# Supplementary material for: Human Genes Encoding Transcription Factors and Chromatin-Modifying Proteins Have Low Levels of Promoter Polymorphism: A Study of 1000 Genomes Project Data
Source: Int J Genomics. 2015 Aug 31;2015:260159. doi: 10.1155/2015/260159 (PMC4568383; doi:10.1155/2015/260159)
Supplement: Supplementary file 1 — Figure S1: Human promoter variability in the whole-genome dataset (Table 1) compared with promoter variability in datasets from chromosomes 1-22 (autosomes) or chromosome X, or chromosome Y. Cumulative percentage plots for the fractions of human transcripts, possessing certain numbers of SNPs in [–600/+100] regions relative to annotated transcription start sites are presented. Figure S2: The comparison of SNP content distributions in upstream regions of seven groups of human transcripts (All TFs, ZNF, HTH, Basic, Other, Chr Mod, Sperm) from chromosomes 1-22 (transcripts from the chromosomes X and Y were excluded from analysis) with the distribution in the whole-genome dataset from which transcripts located on the chromosomes X and Y were also excluded. The significances of the t test (Y axis), which compares SNP contents in seven groups of human transcripts with the content in the whole genome dataset as a function of the SNP content (X axis) are presented. Panel A: All TFs, ZNF, HTH, Basic, Other; Panel B: Chr Mod; Panel C: Sperm. Table S1:Datasets of transcripts, described in the Table 1: All TFs, ZNF, HTH, Basic, Other, Chr Mod, Sperm. HGNC Gene Name, Ensembl Gene ID, Ensembl, Transcript ID, SNP count are presented. Table S2:The full list of the most overrepresented (fold enrichment > 1.5 and p value < 10-3) GO categories for each SNP-depleted dataset. Table S3: The joint list of overrepresented (fold enrichment > 1.5 and p value < 10-3) GO terms revealed from analysis of all SNP-depleted datasets (The duplicates of GO terms were removed). Columns from C to I present the occurrence of each GO term among the overrepresented terms for each SNP-depleted dataset. [file 260159.f1.zip › Table_S1.xls]

## Sheet: All_TFs
Table S1
HGNC Gene Name	Ensembl Gene ID	Ensembl Transcript ID	SNP count				unique HGNC Gene Name only		Genes	1454	Transcripts	3957
HES4	ENSG00000188290	ENST00000304952	8				HES4
HES4	ENSG00000188290	ENST00000428771	8				HES5
HES5	ENSG00000197921	ENST00000378453	4				PRDM16
PRDM16	ENSG00000142611	ENST00000378398	4				TP73
PRDM16	ENSG00000142611	ENST00000270722	4				HES3
PRDM16	ENSG00000142611	ENST00000509860	6				HES2
TP73	ENSG00000078900	ENST00000378295	2				ZBTB48
TP73	ENSG00000078900	ENST00000354437	1				THAP3
TP73	ENSG00000078900	ENST00000603362	9				RERE
TP73	ENSG00000078900	ENST00000378285	4				CASZ1
HES3	ENSG00000173673	ENST00000377898	2				PRDM2
HES2	ENSG00000069812	ENST00000377836	2				ZBTB17
HES2	ENSG00000069812	ENST00000377834	2				PAX7
HES2	ENSG00000069812	ENST00000377837	5				ZBTB40
ZBTB48	ENSG00000204859	ENST00000319084	6				ZNF436
ZBTB48	ENSG00000204859	ENST00000435905	6				E2F2
ZBTB48	ENSG00000204859	ENST00000377674	6				ID3
THAP3	ENSG00000041988	ENST00000054650	1				GRHL3
THAP3	ENSG00000041988	ENST00000307896	2				RUNX3
THAP3	ENSG00000041988	ENST00000377627	2				ZNF683
RERE	ENSG00000142599	ENST00000476556	3				ARID1A
RERE	ENSG00000142599	ENST00000488215	1				NR0B2
RERE	ENSG00000142599	ENST00000468247	0				GMEB1
RERE	ENSG00000142599	ENST00000337907	5				ZNF362
RERE	ENSG00000142599	ENST00000400908	4				ZSCAN20
CASZ1	ENSG00000130940	ENST00000377022	4				SFPQ
CASZ1	ENSG00000130940	ENST00000344008	5				TFAP2E
PRDM2	ENSG00000116731	ENST00000376048	0				MTF1
PRDM2	ENSG00000116731	ENST00000311066	1				POU3F1
PRDM2	ENSG00000116731	ENST00000413440	1				HEYL
PRDM2	ENSG00000116731	ENST00000343137	1				MYCL
PRDM2	ENSG00000116731	ENST00000407521	1				RLF
PRDM2	ENSG00000116731	ENST00000487453	2				ZFP69B
ZBTB17	ENSG00000116809	ENST00000440560	1				ZFP69
ZBTB17	ENSG00000116809	ENST00000444358	5				ZNF684
ZBTB17	ENSG00000116809	ENST00000537142	2				NFYC
ZBTB17	ENSG00000116809	ENST00000448462	2				HIVEP3
ZBTB17	ENSG00000116809	ENST00000375743	2				FOXJ3
ZBTB17	ENSG00000116809	ENST00000375733	2				YBX1
PAX7	ENSG00000009709	ENST00000375375	3				ZNF691
PAX7	ENSG00000009709	ENST00000420770	2				KLF17
PAX7	ENSG00000009709	ENST00000400661	2				DMAP1
ZBTB40	ENSG00000184677	ENST00000404138	1				DMBX1
ZBTB40	ENSG00000184677	ENST00000400239	2				TAL1
ZBTB40	ENSG00000184677	ENST00000374651	2				FOXE3
ZNF436	ENSG00000125945	ENST00000374608	1				FOXD2
ZNF436	ENSG00000125945	ENST00000314011	1				DMRTA2
E2F2	ENSG00000007968	ENST00000361729	3				DMRTB1
ID3	ENSG00000117318	ENST00000374561	0				GLIS1
GRHL3	ENSG00000158055	ENST00000361548	1				JUN
GRHL3	ENSG00000158055	ENST00000342072	1				NFIA
GRHL3	ENSG00000158055	ENST00000350501	1				FOXD3
GRHL3	ENSG00000158055	ENST00000236255	3				MIER1
RUNX3	ENSG00000020633	ENST00000540420	2				LHX8
RUNX3	ENSG00000020633	ENST00000308873	1				BARHL2
RUNX3	ENSG00000020633	ENST00000338888	4				ZNF644
RUNX3	ENSG00000020633	ENST00000399916	4				GFI1
ZNF683	ENSG00000176083	ENST00000451801	4				ALX3
ZNF683	ENSG00000176083	ENST00000403843	2				PHTF1
ZNF683	ENSG00000176083	ENST00000436292	2				NHLH2
ZNF683	ENSG00000176083	ENST00000416125	5				TBX15
ARID1A	ENSG00000117713	ENST00000324856	0				ZNF697
ARID1A	ENSG00000117713	ENST00000540690	0				ARNT
NR0B2	ENSG00000131910	ENST00000254227	2				ZNF687
GMEB1	ENSG00000162419	ENST00000373816	1				RFX5
GMEB1	ENSG00000162419	ENST00000361872	1				POGZ
GMEB1	ENSG00000162419	ENST00000294409	1				RORC
ZNF362	ENSG00000160094	ENST00000539719	0				GATAD2B
ZNF362	ENSG00000160094	ENST00000373428	1				CREB3L4
ZSCAN20	ENSG00000121903	ENST00000361328	1				ZBTB7B
ZSCAN20	ENSG00000121903	ENST00000373413	1				MEF2D
SFPQ	ENSG00000116560	ENST00000357214	4				ETV3
TFAP2E	ENSG00000116819	ENST00000373235	2				NHLH1
MTF1	ENSG00000188786	ENST00000373036	1				USF1
POU3F1	ENSG00000185668	ENST00000373012	1				NR1I3
HEYL	ENSG00000163909	ENST00000535435	2				ATF6
HEYL	ENSG00000163909	ENST00000372852	3				PBX1
MYCL	ENSG00000116990	ENST00000372816	6				LMX1A
MYCL	ENSG00000116990	ENST00000429311	7				RXRG
MYCL	ENSG00000116990	ENST00000450953	3				POU2F1
RLF	ENSG00000117000	ENST00000372771	1				TBX19
ZFP69B	ENSG00000187801	ENST00000361584	6				PRRX1
ZFP69	ENSG00000187815	ENST00000372706	8				ZBTB37
ZFP69	ENSG00000187815	ENST00000372705	4				LHX4
ZNF684	ENSG00000117010	ENST00000372699	4				ZBTB41
ZNF684	ENSG00000117010	ENST00000372697	5				LHX9
NFYC	ENSG00000066136	ENST00000427410	1				NR5A2
NFYC	ENSG00000066136	ENST00000447388	1				ZNF281
NFYC	ENSG00000066136	ENST00000425457	1				ELF3
NFYC	ENSG00000066136	ENST00000453631	1				KDM5B
NFYC	ENSG00000066136	ENST00000456393	1				MYOG
NFYC	ENSG00000066136	ENST00000372654	1				ZBED6
NFYC	ENSG00000066136	ENST00000534399	1				SOX13
NFYC	ENSG00000066136	ENST00000372653	1				ELK4
NFYC	ENSG00000066136	ENST00000372652	1				IRF6
NFYC	ENSG00000066136	ENST00000372651	1				RCOR3
NFYC	ENSG00000066136	ENST00000531464	1				ATF3
NFYC	ENSG00000066136	ENST00000440226	3				BATF3
NFYC	ENSG00000066136	ENST00000308733	1				PROX1
HIVEP3	ENSG00000127124	ENST00000247584	3				ESRRG
HIVEP3	ENSG00000127124	ENST00000372583	0				HLX
HIVEP3	ENSG00000127124	ENST00000372584	3				MIXL1
FOXJ3	ENSG00000198815	ENST00000545068	3				ZNF678
FOXJ3	ENSG00000198815	ENST00000361346	9				ARID4B
FOXJ3	ENSG00000198815	ENST00000372573	3				ZBTB18
YBX1	ENSG00000065978	ENST00000321358	0				ZNF695
YBX1	ENSG00000065978	ENST00000332220	0				ZNF669
YBX1	ENSG00000065978	ENST00000436427	0				ZNF124
ZNF691	ENSG00000164011	ENST00000372508	2				ZNF496
ZNF691	ENSG00000164011	ENST00000372507	2				ZNF672
ZNF691	ENSG00000164011	ENST00000372506	2				ZNF692
ZNF691	ENSG00000164011	ENST00000397044	2				MYT1L
ZNF691	ENSG00000164011	ENST00000372504	2				SOX11
ZNF691	ENSG00000164011	ENST00000397034	0				ID2
ZNF691	ENSG00000164011	ENST00000372503	0				GRHL1
ZNF691	ENSG00000164011	ENST00000372502	3				KLF11
KLF17	ENSG00000171872	ENST00000372299	2				E2F6
DMAP1	ENSG00000178028	ENST00000361745	1				MYCN
DMAP1	ENSG00000178028	ENST00000446292	1				MSGN1
DMAP1	ENSG00000178028	ENST00000440641	1				OSR1
DMAP1	ENSG00000178028	ENST00000436069	1				NCOA1
DMAP1	ENSG00000178028	ENST00000315913	1				DNMT3A
DMAP1	ENSG00000178028	ENST00000372289	1				TCF23
DMAP1	ENSG00000178028	ENST00000372290	2				ZNF513
DMBX1	ENSG00000197587	ENST00000371956	5				ZNF512
DMBX1	ENSG00000197587	ENST00000360032	5				FOSL2
TAL1	ENSG00000162367	ENST00000371883	1				MTA3
TAL1	ENSG00000162367	ENST00000371884	3				SIX3
FOXE3	ENSG00000186790	ENST00000335071	0				SIX2
FOXD2	ENSG00000186564	ENST00000334793	3				EPAS1
DMRTA2	ENSG00000142700	ENST00000418121	0				FOXN2
DMRTA2	ENSG00000142700	ENST00000404795	2				BCL11A
DMRTB1	ENSG00000143006	ENST00000371445	1				REL
GLIS1	ENSG00000174332	ENST00000312233	1				OTX1
JUN	ENSG00000177606	ENST00000371222	5				MEIS1
NFIA	ENSG00000162599	ENST00000407417	4				MXD1
NFIA	ENSG00000162599	ENST00000371189	0				FIGLA
NFIA	ENSG00000162599	ENST00000403491	0				VAX2
NFIA	ENSG00000162599	ENST00000371187	1				EMX1
FOXD3	ENSG00000187140	ENST00000371116	4				NOTO
MIER1	ENSG00000198160	ENST00000371018	4				EGR4
MIER1	ENSG00000198160	ENST00000357692	4				LBX2
MIER1	ENSG00000198160	ENST00000401041	4				TLX2
MIER1	ENSG00000198160	ENST00000401042	1				TCF7L1
LHX8	ENSG00000162624	ENST00000294638	3				ATOH8
LHX8	ENSG00000162624	ENST00000356261	3				ZNF514
BARHL2	ENSG00000143032	ENST00000370445	5				ARID5A
ZNF644	ENSG00000122482	ENST00000347275	2				NPAS2
ZNF644	ENSG00000122482	ENST00000370440	2				RFX8
ZNF644	ENSG00000122482	ENST00000337393	0				POU3F3
GFI1	ENSG00000162676	ENST00000370332	0				ZC3H8
GFI1	ENSG00000162676	ENST00000427103	2				ZC3H6
GFI1	ENSG00000162676	ENST00000294702	2				PAX8
ALX3	ENSG00000156150	ENST00000369792	4				FOXD4L1
PHTF1	ENSG00000116793	ENST00000447664	3				EN1
PHTF1	ENSG00000116793	ENST00000393357	3				GLI2
PHTF1	ENSG00000116793	ENST00000446739	3				TFCP2L1
PHTF1	ENSG00000116793	ENST00000369598	3				ZEB2
PHTF1	ENSG00000116793	ENST00000369600	3				NR4A2
PHTF1	ENSG00000116793	ENST00000369604	3				TBR1
NHLH2	ENSG00000177551	ENST00000429731	5				CSRNP3
NHLH2	ENSG00000177551	ENST00000320238	3				SP5
NHLH2	ENSG00000177551	ENST00000369506	4				DLX1
TBX15	ENSG00000092607	ENST00000207157	4				DLX2
ZNF697	ENSG00000143067	ENST00000421812	2				SP3
ARNT	ENSG00000143437	ENST00000505755	2				ATF2
ARNT	ENSG00000143437	ENST00000515192	3				EVX2
ARNT	ENSG00000143437	ENST00000358595	2				HOXD12
ZNF687	ENSG00000143373	ENST00000336715	0				HOXD11
ZNF687	ENSG00000143373	ENST00000324048	0				HOXD10
ZNF687	ENSG00000143373	ENST00000368879	0				HOXD9
ZNF687	ENSG00000143373	ENST00000426871	1				HOXD8
RFX5	ENSG00000143390	ENST00000458484	0				HOXD3
RFX5	ENSG00000143390	ENST00000392746	1				HOXD4
RFX5	ENSG00000143390	ENST00000436271	1				HOXD1
RFX5	ENSG00000143390	ENST00000450506	1				NFE2L2
RFX5	ENSG00000143390	ENST00000422595	1				NEUROD1
RFX5	ENSG00000143390	ENST00000430227	2				STAT1
RFX5	ENSG00000143390	ENST00000290524	2				STAT4
RFX5	ENSG00000143390	ENST00000437327	2				SATB2
RFX5	ENSG00000143390	ENST00000452513	2				KLF7
RFX5	ENSG00000143390	ENST00000368870	2				CREB1
RFX5	ENSG00000143390	ENST00000452671	3				IKZF2
POGZ	ENSG00000143442	ENST00000392723	3				ZNF142
POGZ	ENSG00000143442	ENST00000439756	2				FEV
POGZ	ENSG00000143442	ENST00000533461	1				PAX3
POGZ	ENSG00000143442	ENST00000450842	1				SP110
POGZ	ENSG00000143442	ENST00000368863	2				SP140
POGZ	ENSG00000143442	ENST00000540984	2				SP140L
POGZ	ENSG00000143442	ENST00000361398	1				SP100
POGZ	ENSG00000143442	ENST00000271715	1				GBX2
RORC	ENSG00000143365	ENST00000356728	1				LRRFIP1
RORC	ENSG00000143365	ENST00000392697	0				HES6
RORC	ENSG00000143365	ENST00000318247	1				TWIST2
GATAD2B	ENSG00000143614	ENST00000368655	4				THAP4
CREB3L4	ENSG00000143578	ENST00000405694	1				PPARG
CREB3L4	ENSG00000143578	ENST00000449724	1				NR2C2
CREB3L4	ENSG00000143578	ENST00000368607	1				SATB1
CREB3L4	ENSG00000143578	ENST00000271889	1				NR1D2
CREB3L4	ENSG00000143578	ENST00000368601	1				THRB
CREB3L4	ENSG00000143578	ENST00000368600	1				RARB
CREB3L4	ENSG00000143578	ENST00000431292	1				EOMES
ZBTB7B	ENSG00000160685	ENST00000535420	3				ZNF860
ZBTB7B	ENSG00000160685	ENST00000368426	3				UBP1
ZBTB7B	ENSG00000160685	ENST00000417934	2				LRRFIP2
MEF2D	ENSG00000116604	ENST00000360595	4				CSRNP1
MEF2D	ENSG00000116604	ENST00000340875	0				ZNF619
MEF2D	ENSG00000116604	ENST00000489057	0				ZNF620
MEF2D	ENSG00000116604	ENST00000348159	0				ZNF621
ETV3	ENSG00000117036	ENST00000368192	6				ZBTB47
ETV3	ENSG00000117036	ENST00000326786	6				ZNF662
NHLH1	ENSG00000171786	ENST00000302101	2				ZNF445
USF1	ENSG00000158773	ENST00000368020	5				ZKSCAN7
USF1	ENSG00000158773	ENST00000435396	1				ZNF660
USF1	ENSG00000158773	ENST00000368021	1				ZNF197
NR1I3	ENSG00000143257	ENST00000367979	5				ZNF35
NR1I3	ENSG00000143257	ENST00000512372	2				ZNF502
NR1I3	ENSG00000143257	ENST00000367984	2				ZNF501
NR1I3	ENSG00000143257	ENST00000367982	2				SMARCC1
NR1I3	ENSG00000143257	ENST00000367980	2				ZNF589
NR1I3	ENSG00000143257	ENST00000367983	3				PBRM1
ATF6	ENSG00000118217	ENST00000367942	3				HESX1
PBX1	ENSG00000185630	ENST00000340699	1				FEZF2
PBX1	ENSG00000185630	ENST00000420696	2				MITF
PBX1	ENSG00000185630	ENST00000401534	3				FOXP1
PBX1	ENSG00000185630	ENST00000540246	5				ZNF717
LMX1A	ENSG00000162761	ENST00000367893	6				POU1F1
LMX1A	ENSG00000162761	ENST00000294816	6				ZNF654
LMX1A	ENSG00000162761	ENST00000342310	1				ZBTB11
RXRG	ENSG00000143171	ENST00000359842	4				NFKBIZ
POU2F1	ENSG00000143190	ENST00000367866	2				BBX
POU2F1	ENSG00000143190	ENST00000452019	2				ZBED2
POU2F1	ENSG00000143190	ENST00000541643	2				ZNF80
POU2F1	ENSG00000143190	ENST00000367862	1				ZBTB20
TBX19	ENSG00000143178	ENST00000367821	0				NR1I2
TBX19	ENSG00000143178	ENST00000431969	0				ARGFX
TBX19	ENSG00000143178	ENST00000441464	3				ZNF148
PRRX1	ENSG00000116132	ENST00000367760	5				KLF15
PRRX1	ENSG00000116132	ENST00000239461	9				ZXDC
ZBTB37	ENSG00000185278	ENST00000367704	4				GATA2
ZBTB37	ENSG00000185278	ENST00000432989	4				SOX14
ZBTB37	ENSG00000185278	ENST00000367701	2				FOXL2
LHX4	ENSG00000121454	ENST00000263726	2				ZBTB38
ZBTB41	ENSG00000177888	ENST00000367405	4				TFDP2
LHX9	ENSG00000143355	ENST00000367390	2				ZIC4
LHX9	ENSG00000143355	ENST00000367387	3				ZIC1
NR5A2	ENSG00000116833	ENST00000367362	3				TSC22D2
NR5A2	ENSG00000116833	ENST00000236914	3				SHOX2
NR5A2	ENSG00000116833	ENST00000447034	3				MECOM
NR5A2	ENSG00000116833	ENST00000544748	2				MYNN
NR5A2	ENSG00000116833	ENST00000367357	0				ZNF639
ZNF281	ENSG00000162702	ENST00000367352	1				SOX2
ZNF281	ENSG00000162702	ENST00000367353	2				ETV5
ZNF281	ENSG00000162702	ENST00000294740	2				BCL6
ELF3	ENSG00000163435	ENST00000359651	4				TP63
ELF3	ENSG00000163435	ENST00000367284	5				HES1
ELF3	ENSG00000163435	ENST00000367283	5				ZNF732
ELF3	ENSG00000163435	ENST00000446188	5				ZNF141
KDM5B	ENSG00000117139	ENST00000367264	5				ZNF721
KDM5B	ENSG00000117139	ENST00000367265	2				NKX1-1
MYOG	ENSG00000122180	ENST00000241651	4				WHSC1
ZBED6	ENSG00000257315	ENST00000550078	1				MXD4
SOX13	ENSG00000143842	ENST00000367204	1				LYAR
SOX13	ENSG00000143842	ENST00000525442	2				ZBTB49
SOX13	ENSG00000143842	ENST00000528591	6				MSX1
ELK4	ENSG00000158711	ENST00000357992	3				TADA2B
IRF6	ENSG00000117595	ENST00000456314	2				HMX1
IRF6	ENSG00000117595	ENST00000367021	4				ZNF518B
IRF6	ENSG00000117595	ENST00000542854	6				NKX3-2
RCOR3	ENSG00000117625	ENST00000534478	1				RBPJ
RCOR3	ENSG00000117625	ENST00000533469	1				KLF3
RCOR3	ENSG00000117625	ENST00000367006	2				PHOX2B
RCOR3	ENSG00000117625	ENST00000452621	1				NFXL1
RCOR3	ENSG00000117625	ENST00000367005	2				GSX2
ATF3	ENSG00000162772	ENST00000366981	3				CLOCK
ATF3	ENSG00000162772	ENST00000366987	3				HOPX
ATF3	ENSG00000162772	ENST00000341491	1				REST
ATF3	ENSG00000162772	ENST00000366985	1				THAP6
ATF3	ENSG00000162772	ENST00000336937	2				PRDM8
BATF3	ENSG00000123685	ENST00000243440	4				THAP9
PROX1	ENSG00000117707	ENST00000471129	4				NKX6-1
PROX1	ENSG00000117707	ENST00000498508	2				ATOH1
PROX1	ENSG00000117707	ENST00000366958	2				NFKB1
PROX1	ENSG00000117707	ENST00000435016	4				LEF1
PROX1	ENSG00000117707	ENST00000607425	4				PITX2
PROX1	ENSG00000117707	ENST00000261454	1				NEUROG2
ESRRG	ENSG00000196482	ENST00000475275	1				PRDM5
ESRRG	ENSG00000196482	ENST00000469486	1				ELF2
ESRRG	ENSG00000196482	ENST00000481543	1				SMARCA5
ESRRG	ENSG00000196482	ENST00000459955	1				SMAD1
ESRRG	ENSG00000196482	ENST00000408911	1				ZNF827
ESRRG	ENSG00000196482	ENST00000360012	7				POU4F2
ESRRG	ENSG00000196482	ENST00000487276	5				NR3C2
ESRRG	ENSG00000196482	ENST00000361395	5				HAND2
ESRRG	ENSG00000196482	ENST00000493748	6				IRF2
ESRRG	ENSG00000196482	ENST00000359162	2				HELT
ESRRG	ENSG00000196482	ENST00000361525	3				ZFP42
ESRRG	ENSG00000196482	ENST00000493603	6				AHRR
ESRRG	ENSG00000196482	ENST00000366940	6				IRX4
HLX	ENSG00000136630	ENST00000366903	5				IRX2
MIXL1	ENSG00000185155	ENST00000366810	4				IRX1
ZNF678	ENSG00000181450	ENST00000397097	2				PRDM9
ARID4B	ENSG00000054267	ENST00000366603	1				ZNF131
ARID4B	ENSG00000054267	ENST00000418304	3				ISL1
ARID4B	ENSG00000054267	ENST00000264183	3				MIER3
ARID4B	ENSG00000054267	ENST00000349213	3				ZNF366
ZBTB18	ENSG00000179456	ENST00000358704	2				FOXD1
ZNF695	ENSG00000197472	ENST00000339986	5				ZBED3
ZNF695	ENSG00000197472	ENST00000487338	6				OTP
ZNF669	ENSG00000188295	ENST00000448299	2				MEF2C
ZNF669	ENSG00000188295	ENST00000358785	2				NR2F1
ZNF124	ENSG00000196418	ENST00000543802	4				PRDM6
ZNF124	ENSG00000196418	ENST00000472531	4				IRF1
ZNF124	ENSG00000196418	ENST00000340684	4				TCF7
ZNF496	ENSG00000162714	ENST00000294753	2				PITX1
ZNF672	ENSG00000171161	ENST00000306562	3				NEUROG1
ZNF672	ENSG00000171161	ENST00000505503	3				SMAD5
ZNF672	ENSG00000171161	ENST00000428515	3				EGR1
ZNF672	ENSG00000171161	ENST00000423362	3				PURA
ZNF692	ENSG00000171163	ENST00000451251	4				NR3C1
ZNF692	ENSG00000171163	ENST00000496231	2				POU4F3
ZNF692	ENSG00000171163	ENST00000306601	2				HMGXB3
ZNF692	ENSG00000171163	ENST00000366471	2				CDX1
MYT1L	ENSG00000186487	ENST00000407844	7				ZNF300
MYT1L	ENSG00000186487	ENST00000428368	5				HAND1
MYT1L	ENSG00000186487	ENST00000399161	5				SOX30
SOX11	ENSG00000176887	ENST00000322002	4				EBF1
ID2	ENSG00000115738	ENST00000234091	5				FOXI1
ID2	ENSG00000115738	ENST00000396290	3				TLX3
ID2	ENSG00000115738	ENST00000331129	4				NKX2-5
GRHL1	ENSG00000134317	ENST00000405379	5				MSX2
GRHL1	ENSG00000134317	ENST00000324883	5				MXD3
GRHL1	ENSG00000134317	ENST00000324907	5				PROP1
KLF11	ENSG00000172059	ENST00000305883	4				ZNF354A
KLF11	ENSG00000172059	ENST00000540845	3				ZNF354B
KLF11	ENSG00000172059	ENST00000535335	9				ZFP2
E2F6	ENSG00000169016	ENST00000307236	0				ZNF454
E2F6	ENSG00000169016	ENST00000381525	3				ZNF879
MYCN	ENSG00000134323	ENST00000281043	0				ZNF354C
MSGN1	ENSG00000151379	ENST00000281047	4				ZFP62
OSR1	ENSG00000143867	ENST00000536433	2				IRF4
OSR1	ENSG00000143867	ENST00000272223	3				FOXQ1
NCOA1	ENSG00000084676	ENST00000406961	1				FOXF2
NCOA1	ENSG00000084676	ENST00000405141	3				FOXC1
NCOA1	ENSG00000084676	ENST00000538539	0				RREB1
NCOA1	ENSG00000084676	ENST00000348332	1				TFAP2A
NCOA1	ENSG00000084676	ENST00000395856	1				GCM2
DNMT3A	ENSG00000119772	ENST00000380746	0				HIVEP1
DNMT3A	ENSG00000119772	ENST00000321117	1				JARID2
DNMT3A	ENSG00000119772	ENST00000264709	1				ID4
TCF23	ENSG00000163792	ENST00000296096	0				E2F3
ZNF513	ENSG00000163795	ENST00000323703	2				SOX4
ZNF512	ENSG00000243943	ENST00000355467	0				ZNF322
ZNF512	ENSG00000243943	ENST00000556601	0				ZNF391
ZNF512	ENSG00000243943	ENST00000416005	0				ZNF184
ZNF512	ENSG00000243943	ENST00000413371	0				ZNF165
FOSL2	ENSG00000075426	ENST00000264716	0				ZSCAN16
FOSL2	ENSG00000075426	ENST00000545753	6				ZKSCAN8
MTA3	ENSG00000057935	ENST00000407270	3				ZSCAN9
MTA3	ENSG00000057935	ENST00000405094	4				ZKSCAN4
SIX3	ENSG00000138083	ENST00000260653	1				ZSCAN31
SIX2	ENSG00000170577	ENST00000303077	1				ZKSCAN3
EPAS1	ENSG00000116016	ENST00000449347	4				ZSCAN12
EPAS1	ENSG00000116016	ENST00000263734	6				ZSCAN23
FOXN2	ENSG00000170802	ENST00000413569	0				ZNF311
FOXN2	ENSG00000170802	ENST00000340553	0				ZFP57
BCL11A	ENSG00000119866	ENST00000538214	0				POU5F1
BCL11A	ENSG00000119866	ENST00000358510	0				NFKBIL1
BCL11A	ENSG00000119866	ENST00000537768	0				ZBTB12
BCL11A	ENSG00000119866	ENST00000335712	0				ATF6B
BCL11A	ENSG00000119866	ENST00000356842	0				PBX2
BCL11A	ENSG00000119866	ENST00000359629	2				RXRB
REL	ENSG00000162924	ENST00000295025	1				ZBTB22
OTX1	ENSG00000115507	ENST00000366671	0				HMGA1
OTX1	ENSG00000115507	ENST00000282549	1				SPDEF
MEIS1	ENSG00000143995	ENST00000407092	1				ZNF76
MEIS1	ENSG00000143995	ENST00000398506	1				PPARD
MEIS1	ENSG00000143995	ENST00000444274	1				TEAD3
MXD1	ENSG00000059728	ENST00000264444	0				ETV7
MXD1	ENSG00000059728	ENST00000540449	0				NFYA
FIGLA	ENSG00000183733	ENST00000332372	2				FOXP4
VAX2	ENSG00000116035	ENST00000234392	6				TFEB
EMX1	ENSG00000135638	ENST00000258106	4				TRERF1
NOTO	ENSG00000214513	ENST00000398468	2				SRF
EGR4	ENSG00000135625	ENST00000545030	2				NFKBIE
EGR4	ENSG00000135625	ENST00000436467	2				CDC5L
LBX2	ENSG00000179528	ENST00000377566	3				RUNX2
LBX2	ENSG00000179528	ENST00000460508	2				TFAP2B
TLX2	ENSG00000115297	ENST00000233638	1				GCM1
TCF7L1	ENSG00000152284	ENST00000282111	0				ZNF451
ATOH8	ENSG00000168874	ENST00000306279	1				TBX18
ZNF514	ENSG00000144026	ENST00000411425	1				ZNF292
ZNF514	ENSG00000144026	ENST00000295208	1				BACH2
ARID5A	ENSG00000196843	ENST00000357485	2				POU3F2
NPAS2	ENSG00000170485	ENST00000335681	5				PRDM13
NPAS2	ENSG00000170485	ENST00000542504	3				SIM1
RFX8	ENSG00000196460	ENST00000376826	6				PRDM1
RFX8	ENSG00000196460	ENST00000428343	6				NR2E1
POU3F3	ENSG00000198914	ENST00000361360	2				FOXO3
ZC3H8	ENSG00000144161	ENST00000272570	3				ZBTB24
ZC3H8	ENSG00000144161	ENST00000409573	3				RFX6
ZC3H6	ENSG00000188177	ENST00000409871	0				HSF2
ZC3H6	ENSG00000188177	ENST00000343936	0				HEY2
PAX8	ENSG00000125618	ENST00000263334	2				TCF21
PAX8	ENSG00000125618	ENST00000263335	2				TBPL1
PAX8	ENSG00000125618	ENST00000429538	2				MYB
FOXD4L1	ENSG00000184492	ENST00000306507	4				OLIG3
EN1	ENSG00000163064	ENST00000295206	4				HIVEP2
GLI2	ENSG00000074047	ENST00000314490	4				PLAGL1
TFCP2L1	ENSG00000115112	ENST00000263707	6				ZBTB2
ZEB2	ENSG00000169554	ENST00000431672	4				ESR1
ZEB2	ENSG00000169554	ENST00000427902	1				ARID1B
ZEB2	ENSG00000169554	ENST00000409487	1				T
ZEB2	ENSG00000169554	ENST00000435831	1				TBP
ZEB2	ENSG00000169554	ENST00000392861	0				UNCX
ZEB2	ENSG00000169554	ENST00000409211	0				MAFK
ZEB2	ENSG00000169554	ENST00000303660	2				FOXK1
ZEB2	ENSG00000169554	ENST00000539609	2				RBAK
ZEB2	ENSG00000169554	ENST00000444559	2				ZNF853
ZEB2	ENSG00000169554	ENST00000558170	2				ETV1
NR4A2	ENSG00000153234	ENST00000539077	1				MEOX2
NR4A2	ENSG00000153234	ENST00000424077	1				AHR
NR4A2	ENSG00000153234	ENST00000339562	1				TWIST1
NR4A2	ENSG00000153234	ENST00000409572	1				FERD3L
TBR1	ENSG00000136535	ENST00000389554	1				SP8
CSRNP3	ENSG00000178662	ENST00000421875	1				SP4
CSRNP3	ENSG00000178662	ENST00000409664	1				NFE2L3
CSRNP3	ENSG00000178662	ENST00000342316	2				HOXA1
SP5	ENSG00000204335	ENST00000375281	3				HOXA2
DLX1	ENSG00000144355	ENST00000361609	3				HOXA3
DLX1	ENSG00000144355	ENST00000469444	3				HOXA4
DLX1	ENSG00000144355	ENST00000361725	0				HOXA5
DLX1	ENSG00000144355	ENST00000341900	2				HOXA6
DLX2	ENSG00000115844	ENST00000234198	3				HOXA7
SP3	ENSG00000172845	ENST00000418194	0				HOXA9
SP3	ENSG00000172845	ENST00000310015	1				HOXA10
ATF2	ENSG00000115966	ENST00000392544	4				HOXA11
ATF2	ENSG00000115966	ENST00000264110	5				HOXA13
EVX2	ENSG00000174279	ENST00000308618	4				EVX1
HOXD12	ENSG00000170178	ENST00000406506	3				CREB5
HOXD11	ENSG00000128713	ENST00000249504	2				NEUROD6
HOXD10	ENSG00000128710	ENST00000249501	5				TBX20
HOXD9	ENSG00000128709	ENST00000249499	2				POU6F2
HOXD8	ENSG00000175879	ENST00000313173	0				GLI3
HOXD8	ENSG00000175879	ENST00000544999	2				PURB
HOXD3	ENSG00000128652	ENST00000432796	3				IKZF1
HOXD3	ENSG00000128652	ENST00000468418	1				ZNF713
HOXD4	ENSG00000170166	ENST00000306324	3				ZNF479
HOXD3	ENSG00000128652	ENST00000410016	2				ZNF716
HOXD3	ENSG00000128652	ENST00000249440	3				ZNF679
HOXD1	ENSG00000128645	ENST00000331462	3				ZNF736
NFE2L2	ENSG00000116044	ENST00000448782	3				ZNF680
NFE2L2	ENSG00000116044	ENST00000397063	2				ZNF107
NFE2L2	ENSG00000116044	ENST00000397062	6				ZNF138
NFE2L2	ENSG00000116044	ENST00000588123	3				ZNF273
NFE2L2	ENSG00000116044	ENST00000464747	5				ZNF117
NEUROD1	ENSG00000162992	ENST00000295108	0				ZNF92
STAT1	ENSG00000115415	ENST00000540176	3				MLXIPL
STAT1	ENSG00000115415	ENST00000409465	6				PHTF2
STAT1	ENSG00000115415	ENST00000392322	6				DMTF1
STAT1	ENSG00000115415	ENST00000424722	6				GATAD1
STAT1	ENSG00000115415	ENST00000361099	7				DLX6
STAT1	ENSG00000115415	ENST00000454414	2				DLX5
STAT1	ENSG00000115415	ENST00000432058	5				BHLHA15
STAT4	ENSG00000138378	ENST00000392320	2				ZNF789
STAT4	ENSG00000138378	ENST00000358470	3				ZNF394
STAT4	ENSG00000138378	ENST00000432798	3				ZKSCAN5
STAT4	ENSG00000138378	ENST00000450994	3				ZNF655
SATB2	ENSG00000119042	ENST00000417098	2				ZSCAN25
SATB2	ENSG00000119042	ENST00000260926	2				ZKSCAN1
SATB2	ENSG00000119042	ENST00000457245	2				ZSCAN21
KLF7	ENSG00000118263	ENST00000412414	4				ZNF3
KLF7	ENSG00000118263	ENST00000309446	2				TSC22D4
KLF7	ENSG00000118263	ENST00000426163	4				CUX1
KLF7	ENSG00000118263	ENST00000457962	1				DNAJC2
CREB1	ENSG00000118260	ENST00000430624	4				HBP1
CREB1	ENSG00000118260	ENST00000432329	2				THAP5
CREB1	ENSG00000118260	ENST00000353267	2				ZNF277
CREB1	ENSG00000118260	ENST00000445803	2				FOXP2
CREB1	ENSG00000118260	ENST00000536726	3				TFEC
CREB1	ENSG00000118260	ENST00000374397	3				FEZF1
CREB1	ENSG00000118260	ENST00000452474	3				ZNF800
CREB1	ENSG00000118260	ENST00000414681	3				PAX4
CREB1	ENSG00000118260	ENST00000539789	3				IRF5
IKZF2	ENSG00000030419	ENST00000451136	0				NRF1
IKZF2	ENSG00000030419	ENST00000457361	8				CNOT4
IKZF2	ENSG00000030419	ENST00000434687	2				CREB3L2
IKZF2	ENSG00000030419	ENST00000452786	3				NOBOX
ZNF142	ENSG00000115568	ENST00000450560	2				ZNF786
ZNF142	ENSG00000115568	ENST00000449707	2				ZNF425
ZNF142	ENSG00000115568	ENST00000432460	2				ZNF398
ZNF142	ENSG00000115568	ENST00000411696	2				ZNF282
FEV	ENSG00000163497	ENST00000295727	2				ZNF212
PAX3	ENSG00000135903	ENST00000409828	5				ZNF777
PAX3	ENSG00000135903	ENST00000350526	5				ZNF746
PAX3	ENSG00000135903	ENST00000258387	6				ZNF467
PAX3	ENSG00000135903	ENST00000409551	6				ZNF775
PAX3	ENSG00000135903	ENST00000392069	6				GBX1
PAX3	ENSG00000135903	ENST00000344493	6				EN2
SP110	ENSG00000135899	ENST00000409815	3				MNX1
SP110	ENSG00000135899	ENST00000258381	5				ZNF596
SP110	ENSG00000135899	ENST00000358662	5				ZNF705G
SP110	ENSG00000135899	ENST00000392048	5				SOX7
SP110	ENSG00000135899	ENST00000258382	5				GATA4
SP110	ENSG00000135899	ENST00000540870	1				ZNF705D
SP140	ENSG00000079263	ENST00000350136	3				EGR3
SP140	ENSG00000079263	ENST00000392045	3				NKX3-1
SP140	ENSG00000079263	ENST00000420434	3				NKX2-6
SP140L	ENSG00000185404	ENST00000444636	6				EBF2
SP140L	ENSG00000185404	ENST00000243810	5				HMBOX1
SP140L	ENSG00000185404	ENST00000458341	9				PURG
SP100	ENSG00000067066	ENST00000264052	10				NKX6-3
SP100	ENSG00000067066	ENST00000427101	7				KAT6A
SP100	ENSG00000067066	ENST00000409341	7				THAP1
SP100	ENSG00000067066	ENST00000341950	6				CEBPD
GBX2	ENSG00000168505	ENST00000306318	6				SNAI2
LRRFIP1	ENSG00000124831	ENST00000289175	10				ST18
LRRFIP1	ENSG00000124831	ENST00000244815	10				SOX17
LRRFIP1	ENSG00000124831	ENST00000392000	8				PLAG1
HES6	ENSG00000144485	ENST00000409160	4				TOX
HES6	ENSG00000144485	ENST00000272937	3				BHLHE22
TWIST2	ENSG00000233608	ENST00000448943	2				MYBL1
THAP4	ENSG00000176946	ENST00000402136	4				PRDM14
THAP4	ENSG00000176946	ENST00000407315	2				NCOA2
PPARG	ENSG00000132170	ENST00000397010	1				MSC
PPARG	ENSG00000132170	ENST00000397029	1				HNF4G
PPARG	ENSG00000132170	ENST00000309576	6				ZFHX4
PPARG	ENSG00000132170	ENST00000397015	7				HEY1
PPARG	ENSG00000132170	ENST00000455517	4				E2F5
PPARG	ENSG00000132170	ENST00000438682	5				OSR2
PPARG	ENSG00000132170	ENST00000539812	2				GRHL2
PPARG	ENSG00000132170	ENST00000287820	0				KLF10
NR2C2	ENSG00000177463	ENST00000435454	5				ZFPM2
NR2C2	ENSG00000177463	ENST00000323373	5				TRPS1
NR2C2	ENSG00000177463	ENST00000437120	0				ZHX2
NR2C2	ENSG00000177463	ENST00000406272	0				ZHX1
SATB1	ENSG00000182568	ENST00000452260	4				ZNF572
SATB1	ENSG00000182568	ENST00000417717	5				POU5F1B
SATB1	ENSG00000182568	ENST00000457005	5				MYC
SATB1	ENSG00000182568	ENST00000338745	2				ZFAT
SATB1	ENSG00000182568	ENST00000450898	2				ZFP41
SATB1	ENSG00000182568	ENST00000444341	0				GLI4
SATB1	ENSG00000182568	ENST00000414509	4				ZNF696
SATB1	ENSG00000182568	ENST00000454909	4				MAFA
SATB1	ENSG00000182568	ENST00000440737	0				ZNF623
SATB1	ENSG00000182568	ENST00000415069	2				ZNF707
NR1D2	ENSG00000174738	ENST00000312521	6				HSF1
THRB	ENSG00000151090	ENST00000396671	3				TONSL
THRB	ENSG00000151090	ENST00000416420	3				FOXH1
THRB	ENSG00000151090	ENST00000356447	3				ZNF251
THRB	ENSG00000151090	ENST00000453729	3				ZNF34
RARB	ENSG00000077092	ENST00000404969	4				ZNF517
RARB	ENSG00000077092	ENST00000437042	0				ZNF7
RARB	ENSG00000077092	ENST00000330688	0				ZNF250
RARB	ENSG00000077092	ENST00000458646	5				ZNF16
EOMES	ENSG00000163508	ENST00000449599	2				FOXD4
EOMES	ENSG00000163508	ENST00000295743	2				DMRT1
EOMES	ENSG00000163508	ENST00000537516	3				DMRT3
ZNF860	ENSG00000197385	ENST00000360311	5				DMRT2
UBP1	ENSG00000153560	ENST00000447368	2				RFX3
UBP1	ENSG00000153560	ENST00000283629	4				GLIS3
UBP1	ENSG00000153560	ENST00000283628	3				NFIB
UBP1	ENSG00000153560	ENST00000456378	3				BNC2
LRRFIP2	ENSG00000093167	ENST00000336686	3				DMRTA1
LRRFIP2	ENSG00000093167	ENST00000434749	0				NFX1
LRRFIP2	ENSG00000093167	ENST00000436858	0				ARID3C
LRRFIP2	ENSG00000093167	ENST00000452742	1				CREB3
LRRFIP2	ENSG00000093167	ENST00000421307	1				PAX5
CSRNP1	ENSG00000144655	ENST00000273153	5				ZBTB5
CSRNP1	ENSG00000144655	ENST00000514182	5				FOXD4L5
ZNF619	ENSG00000177873	ENST00000314686	1				FOXD4L4
ZNF619	ENSG00000177873	ENST00000456778	1				FOXD4L3
ZNF619	ENSG00000177873	ENST00000522736	2				KLF9
ZNF619	ENSG00000177873	ENST00000521353	2				RORB
ZNF620	ENSG00000177842	ENST00000420891	0				FOXB2
ZNF620	ENSG00000177842	ENST00000314529	0				NFIL3
ZNF621	ENSG00000172888	ENST00000403205	1				ZNF484
ZNF621	ENSG00000172888	ENST00000339296	1				BARX1
ZNF621	ENSG00000172888	ENST00000453351	0				ZNF169
ZBTB47	ENSG00000114853	ENST00000232974	2				ZNF510
ZNF662	ENSG00000182983	ENST00000440367	1				ZNF782
ZNF662	ENSG00000182983	ENST00000328199	3				FOXE1
ZNF445	ENSG00000185219	ENST00000425708	1				NR4A3
ZKSCAN7	ENSG00000196345	ENST00000426540	1				ZNF189
ZKSCAN7	ENSG00000196345	ENST00000341840	1				TAL2
ZKSCAN7	ENSG00000196345	ENST00000273320	1				ZNF462
ZNF660	ENSG00000144792	ENST00000416644	5				KLF4
ZNF197	ENSG00000186448	ENST00000412641	2				ZNF483
ZNF660	ENSG00000144792	ENST00000441021	2				ZFP37
ZNF197	ENSG00000186448	ENST00000344387	2				ZNF618
ZNF197	ENSG00000186448	ENST00000396058	2				DEC1
ZNF35	ENSG00000169981	ENST00000396056	1				LHX6
ZNF35	ENSG00000169981	ENST00000432115	1				RC3H2
ZNF35	ENSG00000169981	ENST00000542250	1				ZBTB6
ZNF502	ENSG00000196653	ENST00000449836	1				ZBTB26
ZNF502	ENSG00000196653	ENST00000436624	1				LHX2
ZNF502	ENSG00000196653	ENST00000411443	1				NR5A1
ZNF501	ENSG00000186446	ENST00000396048	5				NR6A1
SMARCC1	ENSG00000173473	ENST00000254480	1				PBX3
ZNF589	ENSG00000164048	ENST00000354698	5				LMX1B
PBRM1	ENSG00000163939	ENST00000296302	0				ZBTB43
PBRM1	ENSG00000163939	ENST00000356770	0				ZBTB34
PBRM1	ENSG00000163939	ENST00000439181	3				ZNF79
PBRM1	ENSG00000163939	ENST00000449505	3				PRRX2
PBRM1	ENSG00000163939	ENST00000424867	3				BARHL1
PBRM1	ENSG00000163939	ENST00000394830	3				GFI1B
PBRM1	ENSG00000163939	ENST00000431678	3				RXRA
PBRM1	ENSG00000163939	ENST00000458294	4				SOHLH1
PBRM1	ENSG00000163939	ENST00000420148	3				LHX3
HESX1	ENSG00000163666	ENST00000295934	1				SNAPC4
HESX1	ENSG00000163666	ENST00000495160	2				KLF6
FEZF2	ENSG00000153266	ENST00000475839	1				GATA3
FEZF2	ENSG00000153266	ENST00000283268	1				DNAJC1
FEZF2	ENSG00000153266	ENST00000486811	4				PTF1A
MITF	ENSG00000187098	ENST00000352241	2				MKX
MITF	ENSG00000187098	ENST00000448226	2				ZNF438
MITF	ENSG00000187098	ENST00000457080	1				ZEB1
MITF	ENSG00000187098	ENST00000451708	0				CREM
MITF	ENSG00000187098	ENST00000314589	0				ZNF248
MITF	ENSG00000187098	ENST00000394355	1				ZNF25
MITF	ENSG00000187098	ENST00000314557	1				ZNF33A
MITF	ENSG00000187098	ENST00000394351	1				ZNF37A
MITF	ENSG00000187098	ENST00000531774	1				ZNF33B
FOXP1	ENSG00000114861	ENST00000485326	1				ZNF239
FOXP1	ENSG00000114861	ENST00000497553	3				ZNF485
FOXP1	ENSG00000114861	ENST00000498215	2				ZNF32
FOXP1	ENSG00000114861	ENST00000475937	4				ZNF22
FOXP1	ENSG00000114861	ENST00000318789	2				DRGX
ZNF717	ENSG00000227124	ENST00000422325	9				TFAM
ZNF717	ENSG00000227124	ENST00000400845	6				ARID5B
POU1F1	ENSG00000064835	ENST00000344265	4				EGR2
POU1F1	ENSG00000064835	ENST00000350375	4				ATOH7
ZNF654	ENSG00000175105	ENST00000309495	0				TET1
ZBTB11	ENSG00000066422	ENST00000312938	2				NEUROG3
NFKBIZ	ENSG00000144802	ENST00000461724	1				KAT6B
NFKBIZ	ENSG00000144802	ENST00000483180	1				HHEX
NFKBIZ	ENSG00000144802	ENST00000326151	2				NKX2-3
NFKBIZ	ENSG00000144802	ENST00000491281	0				PAX2
BBX	ENSG00000114439	ENST00000415149	2				TLX1
BBX	ENSG00000114439	ENST00000325805	2				LBX1
BBX	ENSG00000114439	ENST00000427402	1				NFKB2
BBX	ENSG00000114439	ENST00000454540	2				MXI1
BBX	ENSG00000114439	ENST00000449335	0				TCF7L2
BBX	ENSG00000114439	ENST00000456817	0				VAX1
BBX	ENSG00000114439	ENST00000456419	3				EMX2
BBX	ENSG00000114439	ENST00000402163	3				IKZF5
BBX	ENSG00000114439	ENST00000406780	0				HMX3
BBX	ENSG00000114439	ENST00000413213	1				HMX2
BBX	ENSG00000114439	ENST00000449271	1				NKX1-2
BBX	ENSG00000114439	ENST00000425868	1				FOXI2
BBX	ENSG00000114439	ENST00000449213	1				EBF3
BBX	ENSG00000114439	ENST00000457496	2				NKX6-2
BBX	ENSG00000114439	ENST00000429270	4				UTF1
ZBED2	ENSG00000177494	ENST00000317012	0				VENTX
ZNF80	ENSG00000174255	ENST00000482457	6				ZNF511
ZBTB20	ENSG00000181722	ENST00000474710	4				IRF7
ZBTB20	ENSG00000181722	ENST00000470311	5				DEAF1
ZBTB20	ENSG00000181722	ENST00000482689	5				ASCL2
ZBTB20	ENSG00000181722	ENST00000481632	0				ZNF195
ZBTB20	ENSG00000181722	ENST00000393785	3				ZNF215
ZBTB20	ENSG00000181722	ENST00000464560	1				ZNF214
ZBTB20	ENSG00000181722	ENST00000471418	3				ASCL3
ZBTB20	ENSG00000181722	ENST00000462705	1				ZNF143
ZBTB20	ENSG00000181722	ENST00000357258	2				TEAD1
NR1I2	ENSG00000144852	ENST00000393716	4				ARNTL
NR1I2	ENSG00000144852	ENST00000337940	6				SOX6
ARGFX	ENSG00000186103	ENST00000334384	2				MYOD1
ZNF148	ENSG00000163848	ENST00000495019	5				E2F8
ZNF148	ENSG00000163848	ENST00000465763	2				DBX1
ZNF148	ENSG00000163848	ENST00000492394	3				PAX6
ZNF148	ENSG00000163848	ENST00000471196	3				WT1
ZNF148	ENSG00000163848	ENST00000544464	3				ELF5
ZNF148	ENSG00000163848	ENST00000485866	3				EHF
ZNF148	ENSG00000163848	ENST00000360647	3				ALX4
KLF15	ENSG00000163884	ENST00000296233	2				CREB3L1
ZXDC	ENSG00000070476	ENST00000336332	8				ZNF408
ZXDC	ENSG00000070476	ENST00000389709	8				NR1H3
GATA2	ENSG00000179348	ENST00000430265	2				SPI1
GATA2	ENSG00000179348	ENST00000487848	2				SSRP1
GATA2	ENSG00000179348	ENST00000492608	5				ZFP91
GATA2	ENSG00000179348	ENST00000498200	2				MYRF
GATA2	ENSG00000179348	ENST00000341105	2				MTA2
SOX14	ENSG00000168875	ENST00000306087	2				RCOR2
FOXL2	ENSG00000183770	ENST00000330315	2				ESRRA
ZBTB38	ENSG00000177311	ENST00000509842	2				BATF2
ZBTB38	ENSG00000177311	ENST00000507722	1				RELA
ZBTB38	ENSG00000177311	ENST00000503809	1				KAT5
ZBTB38	ENSG00000177311	ENST00000513258	1				OVOL1
ZBTB38	ENSG00000177311	ENST00000509883	1				FOSL1
ZBTB38	ENSG00000177311	ENST00000514251	1				NPAS4
ZBTB38	ENSG00000177311	ENST00000510338	0				KDM2A
ZBTB38	ENSG00000177311	ENST00000504673	0				TBX10
ZBTB38	ENSG00000177311	ENST00000513570	4				PHOX2A
ZBTB38	ENSG00000177311	ENST00000321464	4				PRKRIR
ZBTB38	ENSG00000177311	ENST00000510726	4				CREBZF
ZBTB38	ENSG00000177311	ENST00000509813	3				PGR
TFDP2	ENSG00000114126	ENST00000397991	3				ZBTB16
TFDP2	ENSG00000114126	ENST00000479040	4				KMT2A
TFDP2	ENSG00000114126	ENST00000310282	5				FOXR1
TFDP2	ENSG00000114126	ENST00000497579	5				HINFP
TFDP2	ENSG00000114126	ENST00000488107	1				POU2F3
TFDP2	ENSG00000114126	ENST00000467634	4				BSX
TFDP2	ENSG00000114126	ENST00000317104	4				ZNF202
TFDP2	ENSG00000114126	ENST00000494358	4				PKNOX2
TFDP2	ENSG00000114126	ENST00000489671	4				ETS1
TFDP2	ENSG00000114126	ENST00000467072	4				FLI1
TFDP2	ENSG00000114126	ENST00000499676	4				BARX2
ZIC4	ENSG00000174963	ENST00000484586	3				PRDM10
ZIC4	ENSG00000174963	ENST00000525172	1				ZBTB44
ZIC4	ENSG00000174963	ENST00000425731	0				KDM5A
ZIC4	ENSG00000174963	ENST00000462748	0				FOXM1
ZIC4	ENSG00000174963	ENST00000463250	4				TEAD4
ZIC4	ENSG00000174963	ENST00000383075	5				ZNF384
ZIC1	ENSG00000152977	ENST00000282928	0				NANOGNB
TSC22D2	ENSG00000196428	ENST00000361136	2				NANOG
SHOX2	ENSG00000168779	ENST00000490689	2				FOXJ2
SHOX2	ENSG00000168779	ENST00000425436	4				ZNF705A
SHOX2	ENSG00000168779	ENST00000389589	5				YBX3
SHOX2	ENSG00000168779	ENST00000441443	5				ETV6
SHOX2	ENSG00000168779	ENST00000483851	2				CREBL2
MECOM	ENSG00000085276	ENST00000466623	4				AEBP2
MECOM	ENSG00000085276	ENST00000460890	4				SOX5
MECOM	ENSG00000085276	ENST00000264674	4				BHLHE41
MECOM	ENSG00000085276	ENST00000475754	3				ARNTL2
MECOM	ENSG00000085276	ENST00000468789	2				DBX2
MECOM	ENSG00000085276	ENST00000481315	3				ARID2
MECOM	ENSG00000085276	ENST00000494292	6				VDR
MYNN	ENSG00000085274	ENST00000349841	3				ZNF641
MYNN	ENSG00000085274	ENST00000392733	2				KMT2D
MYNN	ENSG00000085274	ENST00000356716	2				ATF1
MYNN	ENSG00000085274	ENST00000544106	4				CSRNP2
ZNF639	ENSG00000121864	ENST00000496856	5				TFCP2
ZNF639	ENSG00000121864	ENST00000491818	6				POU6F1
ZNF639	ENSG00000121864	ENST00000481587	6				NR4A1
ZNF639	ENSG00000121864	ENST00000326361	4				ZNF740
ZNF639	ENSG00000121864	ENST00000466264	1				RARG
ZNF639	ENSG00000121864	ENST00000484866	3				SP7
ZNF639	ENSG00000121864	ENST00000494234	5				SP1
SOX2	ENSG00000181449	ENST00000431565	0				ATF7
SOX2	ENSG00000181449	ENST00000325404	0				HOXC13
ETV5	ENSG00000244405	ENST00000537818	4				HOXC12
ETV5	ENSG00000244405	ENST00000434744	4				HOXC11
ETV5	ENSG00000244405	ENST00000413301	3				HOXC10
ETV5	ENSG00000244405	ENST00000421809	3				HOXC6
ETV5	ENSG00000244405	ENST00000306376	1				HOXC9
ETV5	ENSG00000244405	ENST00000440773	1				HOXC8
BCL6	ENSG00000113916	ENST00000430339	5				HOXC5
BCL6	ENSG00000113916	ENST00000232014	4				HOXC4
BCL6	ENSG00000113916	ENST00000438077	4				NFE2
BCL6	ENSG00000113916	ENST00000406870	3				NEUROD4
TP63	ENSG00000073282	ENST00000264731	4				IKZF4
TP63	ENSG00000073282	ENST00000418709	4				SMARCC2
TP63	ENSG00000073282	ENST00000392460	4				STAT2
TP63	ENSG00000073282	ENST00000354600	5				ZBTB39
TP63	ENSG00000073282	ENST00000437221	5				STAT6
HES1	ENSG00000114315	ENST00000232424	3				GLI1
ZNF732	ENSG00000186777	ENST00000419098	3				DDIT3
ZNF141	ENSG00000131127	ENST00000240499	8				HMGA2
ZNF721	ENSG00000182903	ENST00000338977	2				THAP2
ZNF721	ENSG00000182903	ENST00000511833	2				E2F7
NKX1-1	ENSG00000235608	ENST00000422806	4				MYF6
WHSC1	ENSG00000109685	ENST00000508803	0				MYF5
WHSC1	ENSG00000109685	ENST00000507820	0				ALX1
WHSC1	ENSG00000109685	ENST00000514045	0				NR2C1
WHSC1	ENSG00000109685	ENST00000515806	2				ELK3
WHSC1	ENSG00000109685	ENST00000436793	3				NR1H4
WHSC1	ENSG00000109685	ENST00000420906	3				SPIC
WHSC1	ENSG00000109685	ENST00000503128	3				ASCL1
WHSC1	ENSG00000109685	ENST00000509115	1				NFYB
WHSC1	ENSG00000109685	ENST00000398261	1				RFX4
WHSC1	ENSG00000109685	ENST00000382888	1				PRDM4
MXD4	ENSG00000123933	ENST00000337190	7				ASCL4
LYAR	ENSG00000145220	ENST00000452476	7				FOXN4
LYAR	ENSG00000145220	ENST00000513174	8				CUX2
LYAR	ENSG00000145220	ENST00000343470	9				LHX5
ZBTB49	ENSG00000168826	ENST00000355834	8				TBX5
ZBTB49	ENSG00000168826	ENST00000538529	8				TBX3
ZBTB49	ENSG00000168826	ENST00000502918	8				HNF1A
MSX1	ENSG00000163132	ENST00000382723	3				MLXIP
TADA2B	ENSG00000173011	ENST00000506692	2				ZNF664
TADA2B	ENSG00000173011	ENST00000310074	3				NCOR2
TADA2B	ENSG00000173011	ENST00000512388	2				ZNF605
TADA2B	ENSG00000173011	ENST00000515646	2				ZNF26
TADA2B	ENSG00000173011	ENST00000510704	2				ZNF84
HMX1	ENSG00000215612	ENST00000400677	7				ZNF140
ZNF518B	ENSG00000178163	ENST00000326756	1				ZNF891
ZNF518B	ENSG00000178163	ENST00000507515	1				ZNF10
NKX3-2	ENSG00000109705	ENST00000382438	3				ZNF268
RBPJ	ENSG00000168214	ENST00000512351	10				PSPC1
RBPJ	ENSG00000168214	ENST00000506956	0				GSX1
RBPJ	ENSG00000168214	ENST00000512671	0				PDX1
RBPJ	ENSG00000168214	ENST00000345843	0				CDX2
RBPJ	ENSG00000168214	ENST00000361572	4				SOHLH2
RBPJ	ENSG00000168214	ENST00000514807	3				RFXAP
RBPJ	ENSG00000168214	ENST00000348160	3				SMAD9
RBPJ	ENSG00000168214	ENST00000509158	3				FOXO1
RBPJ	ENSG00000168214	ENST00000355476	3				ELF1
RBPJ	ENSG00000168214	ENST00000505958	3				TSC22D1
RBPJ	ENSG00000168214	ENST00000507561	4				KLF5
RBPJ	ENSG00000168214	ENST00000514730	1				KLF12
RBPJ	ENSG00000168214	ENST00000507574	2				POU4F1
RBPJ	ENSG00000168214	ENST00000514675	4				SOX21
RBPJ	ENSG00000168214	ENST00000515573	3				ZIC5
RBPJ	ENSG00000168214	ENST00000511546	1				ZIC2
RBPJ	ENSG00000168214	ENST00000342320	1				SOX1
RBPJ	ENSG00000168214	ENST00000504938	1				TFDP1
KLF3	ENSG00000109787	ENST00000261438	1				ZNF219
PHOX2B	ENSG00000109132	ENST00000226382	3				TOX4
NFXL1	ENSG00000170448	ENST00000381538	2				SALL2
GSX2	ENSG00000180613	ENST00000326902	1				CEBPE
CLOCK	ENSG00000134852	ENST00000309964	7				HOMEZ
CLOCK	ENSG00000134852	ENST00000435527	5				ZFHX2
CLOCK	ENSG00000134852	ENST00000513440	3				NRL
HOPX	ENSG00000171476	ENST00000503639	4				IRF9
HOPX	ENSG00000171476	ENST00000553379	3				NFATC4
HOPX	ENSG00000171476	ENST00000381255	3				FOXG1
HOPX	ENSG00000171476	ENST00000317745	3				NPAS3
HOPX	ENSG00000171476	ENST00000555760	3				NFKBIA
HOPX	ENSG00000171476	ENST00000556614	3				INSM2
HOPX	ENSG00000171476	ENST00000508121	3				NKX2-1
HOPX	ENSG00000171476	ENST00000556376	3				NKX2-8
HOPX	ENSG00000171476	ENST00000381260	5				PAX9
HOPX	ENSG00000171476	ENST00000420433	5				FOXA1
HOPX	ENSG00000171476	ENST00000337881	6				TBPL2
REST	ENSG00000084093	ENST00000309042	6				OTX2
THAP6	ENSG00000174796	ENST00000506261	3				ARID4A
THAP6	ENSG00000174796	ENST00000504218	1				SIX6
THAP6	ENSG00000174796	ENST00000311638	0				SIX1
THAP6	ENSG00000174796	ENST00000514480	0				SIX4
PRDM8	ENSG00000152784	ENST00000504452	4				HIF1A
PRDM8	ENSG00000152784	ENST00000515013	6				ESR2
PRDM8	ENSG00000152784	ENST00000415738	4				ZBTB1
THAP9	ENSG00000168152	ENST00000302236	1				ZBTB25
NKX6-1	ENSG00000163623	ENST00000295886	5				MAX
ATOH1	ENSG00000172238	ENST00000306011	4				ELMSAN1
NFKB1	ENSG00000109320	ENST00000226574	2				ZNF410
NFKB1	ENSG00000109320	ENST00000394820	2				VSX2
NFKB1	ENSG00000109320	ENST00000511926	2				PROX2
NFKB1	ENSG00000109320	ENST00000505458	1				FOS
NFKB1	ENSG00000109320	ENST00000509165	1				JDP2
LEF1	ENSG00000138795	ENST00000438313	1				BATF
LEF1	ENSG00000138795	ENST00000265165	1				ESRRB
LEF1	ENSG00000138795	ENST00000379951	2				FOXN3
PITX2	ENSG00000164093	ENST00000306732	2				GSC
PITX2	ENSG00000164093	ENST00000394598	2				BCL11B
PITX2	ENSG00000164093	ENST00000355080	2				YY1
PITX2	ENSG00000164093	ENST00000354925	2				RCOR1
PITX2	ENSG00000164093	ENST00000511990	2				ZBTB42
PITX2	ENSG00000164093	ENST00000511837	2				MTA1
NEUROG2	ENSG00000178403	ENST00000313341	1				KLF13
PRDM5	ENSG00000138738	ENST00000264808	2				ZNF770
PRDM5	ENSG00000138738	ENST00000428209	2				MEIS2
PRDM5	ENSG00000138738	ENST00000394435	2				MGA
ELF2	ENSG00000109381	ENST00000379549	3				ZSCAN29
ELF2	ENSG00000109381	ENST00000358635	3				ONECUT1
ELF2	ENSG00000109381	ENST00000379550	1				RFX7
ELF2	ENSG00000109381	ENST00000394235	3				ZNF280D
SMARCA5	ENSG00000153147	ENST00000283131	0				TCF12
SMAD1	ENSG00000170365	ENST00000514778	2				FOXB1
SMAD1	ENSG00000170365	ENST00000507594	2				RORA
SMAD1	ENSG00000170365	ENST00000514831	7				SMAD6
SMAD1	ENSG00000170365	ENST00000302085	8				SMAD3
SMAD1	ENSG00000170365	ENST00000512019	8				THAP10
SMAD1	ENSG00000170365	ENST00000503324	3				ARID3B
SMAD1	ENSG00000170365	ENST00000507367	2				ISL2
SMAD1	ENSG00000170365	ENST00000394092	2				HMG20A
SMAD1	ENSG00000170365	ENST00000515385	2				ARNT2
ZNF827	ENSG00000151612	ENST00000513320	2				BNC1
ZNF827	ENSG00000151612	ENST00000508784	2				ZSCAN2
POU4F2	ENSG00000151615	ENST00000281321	2				ZNF592
NR3C2	ENSG00000151623	ENST00000512865	3				MESP1
NR3C2	ENSG00000151623	ENST00000355292	2				MESP2
NR3C2	ENSG00000151623	ENST00000344721	4				ZNF710
HAND2	ENSG00000164107	ENST00000359562	3				ZNF774
IRF2	ENSG00000168310	ENST00000510814	5				NR2F2
IRF2	ENSG00000168310	ENST00000507523	5				MEF2A
IRF2	ENSG00000168310	ENST00000506230	3				SOX8
IRF2	ENSG00000168310	ENST00000393593	2				CRAMP1L
HELT	ENSG00000187821	ENST00000505610	0				E4F1
HELT	ENSG00000187821	ENST00000338875	0				ZSCAN10
ZFP42	ENSG00000179059	ENST00000509524	0				ZNF205
AHRR	ENSG00000063438	ENST00000505113	9				ZNF213
IRX4	ENSG00000113430	ENST00000231357	7				ZNF200
IRX4	ENSG00000113430	ENST00000505790	6				ZNF263
IRX4	ENSG00000113430	ENST00000513692	6				ZNF75A
IRX2	ENSG00000170561	ENST00000302057	1				ZSCAN32
IRX2	ENSG00000170561	ENST00000382611	1				ZNF174
IRX1	ENSG00000170549	ENST00000302006	2				ZNF597
PRDM9	ENSG00000164256	ENST00000502755	2				TFAP4
PRDM9	ENSG00000164256	ENST00000296682	3				GLIS2
ZNF131	ENSG00000172262	ENST00000515326	2				ZNF500
ZNF131	ENSG00000172262	ENST00000509156	3				ZKSCAN2
ZNF131	ENSG00000172262	ENST00000508259	3				MAZ
ZNF131	ENSG00000172262	ENST00000306938	3				TBX6
ZNF131	ENSG00000172262	ENST00000505606	2				ZNF48
ZNF131	ENSG00000172262	ENST00000509634	2				ZNF771
ZNF131	ENSG00000172262	ENST00000509341	2				ZNF768
ISL1	ENSG00000016082	ENST00000230658	2				ZNF764
ISL1	ENSG00000016082	ENST00000511384	2				ZNF785
MIER3	ENSG00000155545	ENST00000381199	2				ZNF689
MIER3	ENSG00000155545	ENST00000381213	2				ZNF629
ZNF366	ENSG00000178175	ENST00000318442	5				ZNF668
FOXD1	ENSG00000251493	ENST00000499003	4				ZNF646
ZBED3	ENSG00000132846	ENST00000511587	2				KAT8
ZBED3	ENSG00000132846	ENST00000255198	2				ZNF267
OTP	ENSG00000171540	ENST00000306422	3				ZNF423
MEF2C	ENSG00000081189	ENST00000539796	1				SALL1
MEF2C	ENSG00000081189	ENST00000509373	3				TOX3
MEF2C	ENSG00000081189	ENST00000506716	3				IRX3
MEF2C	ENSG00000081189	ENST00000507984	1				IRX5
MEF2C	ENSG00000081189	ENST00000508610	0				IRX6
MEF2C	ENSG00000081189	ENST00000513252	0				ZNF319
MEF2C	ENSG00000081189	ENST00000510942	1				HSF4
MEF2C	ENSG00000081189	ENST00000514028	1				E2F4
MEF2C	ENSG00000081189	ENST00000514015	1				CTCF
MEF2C	ENSG00000081189	ENST00000503075	1				THAP11
MEF2C	ENSG00000081189	ENST00000437473	1				NFATC3
MEF2C	ENSG00000081189	ENST00000504921	1				ZFP90
MEF2C	ENSG00000081189	ENST00000502983	3				NFAT5
MEF2C	ENSG00000081189	ENST00000424173	1				ZNF23
NR2F1	ENSG00000175745	ENST00000327111	6				ZNF19
PRDM6	ENSG00000061455	ENST00000407847	10				ZFHX3
IRF1	ENSG00000125347	ENST00000476613	3				ZFP1
IRF1	ENSG00000125347	ENST00000405885	7				MAF
IRF1	ENSG00000125347	ENST00000458069	7				IRF8
IRF1	ENSG00000125347	ENST00000245414	8				FOXF1
TCF7	ENSG00000081059	ENST00000378564	2				FOXC2
TCF7	ENSG00000081059	ENST00000518887	3				FOXL1
TCF7	ENSG00000081059	ENST00000521639	3				ZNF469
TCF7	ENSG00000081059	ENST00000432532	3				ZFPM1
TCF7	ENSG00000081059	ENST00000520958	3				SNAI3
TCF7	ENSG00000081059	ENST00000518915	3				ZNF778
PITX1	ENSG00000069011	ENST00000265340	2				ZNF276
PITX1	ENSG00000069011	ENST00000506438	2				TCF25
PITX1	ENSG00000069011	ENST00000502676	2				BHLHA9
PITX1	ENSG00000069011	ENST00000507253	2				HIC1
NEUROG1	ENSG00000181965	ENST00000314744	2				MNT
SMAD5	ENSG00000113658	ENST00000507118	1				ZFP3
SMAD5	ENSG00000113658	ENST00000509297	2				ZNF232
SMAD5	ENSG00000113658	ENST00000506223	3				ZNF594
EGR1	ENSG00000120738	ENST00000239938	1				BCL6B
PURA	ENSG00000185129	ENST00000331327	1				YBX2
NR3C1	ENSG00000113580	ENST00000424646	7				ZBTB4
NR3C1	ENSG00000113580	ENST00000502500	2				SOX15
NR3C1	ENSG00000113580	ENST00000510170	7				TP53
NR3C1	ENSG00000113580	ENST00000415690	12				HES7
NR3C1	ENSG00000113580	ENST00000231509	7				ZNF18
NR3C1	ENSG00000113580	ENST00000394464	7				NCOR1
NR3C1	ENSG00000113580	ENST00000508760	4				ZNF287
NR3C1	ENSG00000113580	ENST00000394466	6				ZNF624
NR3C1	ENSG00000113580	ENST00000416954	9				SREBF1
NR3C1	ENSG00000113580	ENST00000503201	7				ZNF286B
NR3C1	ENSG00000113580	ENST00000502892	5				VTN
NR3C1	ENSG00000113580	ENST00000514699	5				FOXN1
NR3C1	ENSG00000113580	ENST00000504572	5				NEUROD2
NR3C1	ENSG00000113580	ENST00000343796	6				IKZF3
POU4F3	ENSG00000091010	ENST00000230732	1				THRA
HMGXB3	ENSG00000113716	ENST00000502717	3				NR1D1
CDX1	ENSG00000113722	ENST00000231656	3				RARA
ZNF300	ENSG00000145908	ENST00000394226	6				SMARCE1
ZNF300	ENSG00000145908	ENST00000446148	6				STAT5B
HAND1	ENSG00000113196	ENST00000231121	2				STAT5A
SOX30	ENSG00000039600	ENST00000311371	4				STAT3
SOX30	ENSG00000039600	ENST00000265007	3				MLX
EBF1	ENSG00000164330	ENST00000380654	3				ETV4
EBF1	ENSG00000164330	ENST00000313708	3				MEOX1
FOXI1	ENSG00000168269	ENST00000306268	5				UBTF
FOXI1	ENSG00000168269	ENST00000449804	5				TBX21
TLX3	ENSG00000164438	ENST00000296921	4				SP6
NKX2-5	ENSG00000183072	ENST00000424406	3				SP2
NKX2-5	ENSG00000183072	ENST00000329198	2				NFE2L1
MSX2	ENSG00000120149	ENST00000239243	2				HOXB1
MXD3	ENSG00000213347	ENST00000427908	2				HOXB2
MXD3	ENSG00000213347	ENST00000439742	2				HOXB3
MXD3	ENSG00000213347	ENST00000513063	4				HOXB4
PROP1	ENSG00000175325	ENST00000308304	4				HOXB5
ZNF354A	ENSG00000169131	ENST00000520331	8				HOXB6
ZNF354A	ENSG00000169131	ENST00000335815	4				HOXB7
ZNF354B	ENSG00000178338	ENST00000322434	7				HOXB8
ZNF354B	ENSG00000178338	ENST00000520377	11				HOXB9
ZFP2	ENSG00000198939	ENST00000361362	13				HOXB13
ZFP2	ENSG00000198939	ENST00000520660	13				ZNF652
ZFP2	ENSG00000198939	ENST00000520805	13				KAT7
ZFP2	ENSG00000198939	ENST00000520301	0				DLX4
ZNF454	ENSG00000178187	ENST00000320129	5				DLX3
ZNF454	ENSG00000178187	ENST00000519564	5				HLF
ZNF879	ENSG00000234284	ENST00000444149	7				VEZF1
ZNF879	ENSG00000234284	ENST00000522442	7				HSF5
ZNF879	ENSG00000234284	ENST00000521285	9				TBX4
ZNF354C	ENSG00000177932	ENST00000315475	4				SOX9
ZFP62	ENSG00000196670	ENST00000509066	7				FOXJ1
ZFP62	ENSG00000196670	ENST00000504225	6				MAFG
ZFP62	ENSG00000196670	ENST00000512132	6				FOXK2
ZFP62	ENSG00000196670	ENST00000359141	6				TGIF1
IRF4	ENSG00000137265	ENST00000380956	2				ZBTB14
FOXQ1	ENSG00000164379	ENST00000296839	6				ZNF519
FOXF2	ENSG00000137273	ENST00000259806	2				GATA6
FOXC1	ENSG00000054598	ENST00000380874	3				ZNF521
RREB1	ENSG00000124782	ENST00000379933	3				ZNF397
RREB1	ENSG00000124782	ENST00000491191	2				ZSCAN30
RREB1	ENSG00000124782	ENST00000379938	2				ZNF24
RREB1	ENSG00000124782	ENST00000471433	2				ZNF396
RREB1	ENSG00000124782	ENST00000467782	3				SMAD2
RREB1	ENSG00000124782	ENST00000334984	3				ZBTB7C
RREB1	ENSG00000124782	ENST00000483150	2				SMAD7
TFAP2A	ENSG00000137203	ENST00000379608	5				MBD1
TFAP2A	ENSG00000137203	ENST00000379604	1				CXXC1
TFAP2A	ENSG00000137203	ENST00000482890	5				SMAD4
TFAP2A	ENSG00000137203	ENST00000319516	3				TCF4
GCM2	ENSG00000124827	ENST00000379491	3				ONECUT2
HIVEP1	ENSG00000095951	ENST00000491710	1				ZNF532
HIVEP1	ENSG00000095951	ENST00000487103	3				RAX
HIVEP1	ENSG00000095951	ENST00000379388	1				ZNF407
HIVEP1	ENSG00000095951	ENST00000478545	2				TSHZ1
HIVEP1	ENSG00000095951	ENST00000541134	1				ZNF516
JARID2	ENSG00000008083	ENST00000341776	1				ZNF236
JARID2	ENSG00000008083	ENST00000397311	2				SALL3
JARID2	ENSG00000008083	ENST00000541660	3				NFATC1
ID4	ENSG00000172201	ENST00000378700	7				ADNP2
E2F3	ENSG00000112242	ENST00000346618	1				MIER2
E2F3	ENSG00000112242	ENST00000535432	1				ARID3A
SOX4	ENSG00000124766	ENST00000244745	0				TCF3
SOX4	ENSG00000124766	ENST00000543472	0				ONECUT3
ZNF322	ENSG00000181315	ENST00000471278	2				KLF16
ZNF322	ENSG00000181315	ENST00000480036	1				ZNF554
ZNF322	ENSG00000181315	ENST00000415922	3				ZNF555
ZNF391	ENSG00000124613	ENST00000244576	6				ZNF556
ZNF391	ENSG00000124613	ENST00000461521	7				ZNF57
ZNF184	ENSG00000096654	ENST00000377419	3				ZNF77
ZNF184	ENSG00000096654	ENST00000211936	3				NFIC
ZNF165	ENSG00000197279	ENST00000377325	5				HMG20B
ZSCAN16	ENSG00000196812	ENST00000340487	3				RAX2
ZKSCAN8	ENSG00000198315	ENST00000457389	2				ZBTB7A
ZSCAN9	ENSG00000137185	ENST00000531941	2				CREB3L3
ZSCAN9	ENSG00000137185	ENST00000252207	3				RFX2
ZSCAN9	ENSG00000137185	ENST00000526391	4				ZNF557
ZKSCAN4	ENSG00000187626	ENST00000377294	3				ZNF358
ZKSCAN4	ENSG00000187626	ENST00000423974	4				ZNF414
ZSCAN31	ENSG00000235109	ENST00000439636	4				ZNF558
ZSCAN31	ENSG00000235109	ENST00000447021	3				ZNF317
ZSCAN31	ENSG00000235109	ENST00000439158	5				ZNF699
ZSCAN31	ENSG00000235109	ENST00000344279	5				ZNF559
ZSCAN31	ENSG00000235109	ENST00000453745	5				ZNF177
ZSCAN31	ENSG00000235109	ENST00000426756	6				ZNF266
ZKSCAN3	ENSG00000189298	ENST00000252211	4				ZNF560
ZKSCAN3	ENSG00000189298	ENST00000341464	4				ZNF426
ZSCAN31	ENSG00000235109	ENST00000444081	6				ZNF121
ZSCAN31	ENSG00000235109	ENST00000446222	5				ZNF561
ZSCAN31	ENSG00000235109	ENST00000396838	5				ZNF562
ZSCAN31	ENSG00000235109	ENST00000434036	6				ZNF812
ZSCAN31	ENSG00000235109	ENST00000414429	5				ZNF846
ZSCAN12	ENSG00000158691	ENST00000396827	10				DNMT1
ZSCAN12	ENSG00000158691	ENST00000361028	10				ZGLP1
ZSCAN23	ENSG00000187987	ENST00000289788	8				ZNF653
ZNF311	ENSG00000197935	ENST00000377179	3				ZNF627
ZFP57	ENSG00000204644	ENST00000376881	3				ZNF823
ZFP57	ENSG00000204644	ENST00000488757	4				ZNF441
ZFP57	ENSG00000204644	ENST00000376883	13				ZNF491
POU5F1	ENSG00000204531	ENST00000259915	10				ZNF440
NFKBIL1	ENSG00000204498	ENST00000376146	4				ZNF439
NFKBIL1	ENSG00000204498	ENST00000376148	5				ZNF69
NFKBIL1	ENSG00000204498	ENST00000376145	4				ZNF763
ZBTB12	ENSG00000204366	ENST00000375527	4				ZNF433
ATF6B	ENSG00000213676	ENST00000453203	2				ZNF878
ATF6B	ENSG00000213676	ENST00000375203	0				ZNF844
ATF6B	ENSG00000213676	ENST00000375201	0				ZNF20
PBX2	ENSG00000204304	ENST00000375050	1				ZNF136
RXRB	ENSG00000204231	ENST00000413614	1				ZNF44
RXRB	ENSG00000204231	ENST00000374680	1				ZNF563
RXRB	ENSG00000204231	ENST00000544186	1				ZNF442
ZBTB22	ENSG00000236104	ENST00000431845	1				ZNF799
ZBTB22	ENSG00000236104	ENST00000441117	1				ZNF443
ZBTB22	ENSG00000236104	ENST00000418724	1				ZNF709
HMGA1	ENSG00000137309	ENST00000447654	3				ZNF564
HMGA1	ENSG00000137309	ENST00000395004	3				ZNF490
HMGA1	ENSG00000137309	ENST00000374116	6				ZNF791
SPDEF	ENSG00000124664	ENST00000374037	3				JUNB
SPDEF	ENSG00000124664	ENST00000544425	4				KLF1
ZNF76	ENSG00000065029	ENST00000469195	1				NFIX
ZNF76	ENSG00000065029	ENST00000373953	3				LYL1
ZNF76	ENSG00000065029	ENST00000440666	3				RFX1
ZNF76	ENSG00000065029	ENST00000339411	3				ZNF333
PPARD	ENSG00000112033	ENST00000444397	2				WIZ
PPARD	ENSG00000112033	ENST00000337400	2				KLF2
PPARD	ENSG00000112033	ENST00000540939	2				NR2F6
TEAD3	ENSG00000007866	ENST00000338863	5				JUND
ETV7	ENSG00000010030	ENST00000538992	11				MEF2B
ETV7	ENSG00000010030	ENST00000340181	10				RFXANK
ETV7	ENSG00000010030	ENST00000339796	3				GATAD2A
NFYA	ENSG00000001167	ENST00000341376	0				PBX4
NFYA	ENSG00000001167	ENST00000353205	0				ZNF101
FOXP4	ENSG00000137166	ENST00000373060	2				ZNF14
FOXP4	ENSG00000137166	ENST00000373057	3				ZNF506
FOXP4	ENSG00000137166	ENST00000307972	6				ZNF253
TFEB	ENSG00000112561	ENST00000419574	4				ZNF93
TFEB	ENSG00000112561	ENST00000416140	8				ZNF682
TFEB	ENSG00000112561	ENST00000424495	2				ZNF90
TFEB	ENSG00000112561	ENST00000445700	1				ZNF737
TFEB	ENSG00000112561	ENST00000433032	2				ZNF626
TFEB	ENSG00000112561	ENST00000419396	5				ZNF85
TFEB	ENSG00000112561	ENST00000230323	4				ZNF430
TFEB	ENSG00000112561	ENST00000373033	0				ZNF714
TFEB	ENSG00000112561	ENST00000403298	1				ZNF431
TRERF1	ENSG00000124496	ENST00000372922	1				ZNF708
TRERF1	ENSG00000124496	ENST00000541110	1				ZNF493
SRF	ENSG00000112658	ENST00000265354	0				ZNF100
SRF	ENSG00000112658	ENST00000457278	1				ZNF43
NFKBIE	ENSG00000146232	ENST00000443607	4				ZNF257
NFKBIE	ENSG00000146232	ENST00000275015	9				ZNF676
CDC5L	ENSG00000096401	ENST00000371477	1				ZNF729
RUNX2	ENSG00000124813	ENST00000352853	3				ZNF98
RUNX2	ENSG00000124813	ENST00000371438	1				ZNF492
RUNX2	ENSG00000124813	ENST00000371436	0				ZNF99
RUNX2	ENSG00000124813	ENST00000371432	1				ZNF730
RUNX2	ENSG00000124813	ENST00000359524	2				ZNF91
TFAP2B	ENSG00000008196	ENST00000344788	4				ZNF675
TFAP2B	ENSG00000008196	ENST00000263046	4				ZNF681
GCM1	ENSG00000137270	ENST00000259803	1				ZNF726
ZNF451	ENSG00000112200	ENST00000370706	4				ZNF254
ZNF451	ENSG00000112200	ENST00000357489	4				ZNF536
ZNF451	ENSG00000112200	ENST00000370708	4				TSHZ3
TBX18	ENSG00000112837	ENST00000369663	0				ZNF507
ZNF292	ENSG00000188994	ENST00000369577	1				CEBPA
BACH2	ENSG00000112182	ENST00000257749	2				CEBPG
BACH2	ENSG00000112182	ENST00000537989	1				ZNF302
POU3F2	ENSG00000184486	ENST00000328345	2				ZNF181
PRDM13	ENSG00000112238	ENST00000369215	1				ZNF599
SIM1	ENSG00000112246	ENST00000262901	3				ZNF30
SIM1	ENSG00000112246	ENST00000369208	4				ZNF792
PRDM1	ENSG00000057657	ENST00000369096	0				USF2
NR2E1	ENSG00000112333	ENST00000368986	1				ETV2
FOXO3	ENSG00000118689	ENST00000343882	4				ZBTB32
FOXO3	ENSG00000118689	ENST00000406360	1				NFKBID
FOXO3	ENSG00000118689	ENST00000540898	2				THAP8
ZBTB24	ENSG00000112365	ENST00000230122	4				OVOL3
RFX6	ENSG00000185002	ENST00000332958	7				ZNF565
HSF2	ENSG00000025156	ENST00000368455	4				ZNF146
HSF2	ENSG00000025156	ENST00000452194	4				ZFP14
HEY2	ENSG00000135547	ENST00000368365	1				ZFP82
HEY2	ENSG00000135547	ENST00000368364	6				ZNF566
TCF21	ENSG00000118526	ENST00000367882	4				ZNF260
TCF21	ENSG00000118526	ENST00000237316	4				ZNF529
TBPL1	ENSG00000028839	ENST00000416965	7				ZNF382
TBPL1	ENSG00000028839	ENST00000457715	7				ZNF461
TBPL1	ENSG00000028839	ENST00000367871	5				ZNF567
TBPL1	ENSG00000028839	ENST00000367869	5				ZNF790
MYB	ENSG00000118513	ENST00000341911	2				ZNF345
MYB	ENSG00000118513	ENST00000367814	2				ZNF829
OLIG3	ENSG00000177468	ENST00000367734	6				ZNF568
HIVEP2	ENSG00000010818	ENST00000367604	3				ZNF420
HIVEP2	ENSG00000010818	ENST00000367603	0				ZNF585A
PLAGL1	ENSG00000118495	ENST00000367571	2				ZNF383
PLAGL1	ENSG00000118495	ENST00000367572	0				HKR1
PLAGL1	ENSG00000118495	ENST00000360537	2				ZNF527
PLAGL1	ENSG00000118495	ENST00000354765	2				ZNF569
PLAGL1	ENSG00000118495	ENST00000417959	3				ZNF570
PLAGL1	ENSG00000118495	ENST00000429150	3				ZNF793
PLAGL1	ENSG00000118495	ENST00000444202	2				ZNF540
ZBTB2	ENSG00000181472	ENST00000325144	2				ZNF571
ESR1	ENSG00000091831	ENST00000404742	0				ZFP30
ESR1	ENSG00000091831	ENST00000338799	5				ZNF781
ESR1	ENSG00000091831	ENST00000456483	2				ZNF607
ESR1	ENSG00000091831	ENST00000446550	1				ZNF573
ESR1	ENSG00000091831	ENST00000443427	1				NFKBIB
ESR1	ENSG00000091831	ENST00000206249	3				ZNF546
ESR1	ENSG00000091831	ENST00000406599	3				ZNF780B
ARID1B	ENSG00000049618	ENST00000350026	2				ZNF780A
ARID1B	ENSG00000049618	ENST00000367148	2				DMRTC2
ARID1B	ENSG00000049618	ENST00000275248	2				ZNF574
T	ENSG00000164458	ENST00000296946	2				POU2F2
T	ENSG00000164458	ENST00000461348	2				ZNF526
TBP	ENSG00000112592	ENST00000392092	5				ERF
TBP	ENSG00000112592	ENST00000230354	6				CIC
UNCX	ENSG00000164853	ENST00000316333	1				ZNF575
MAFK	ENSG00000198517	ENST00000343242	4				ZNF576
MAFK	ENSG00000198517	ENST00000406174	0				ZNF283
FOXK1	ENSG00000164916	ENST00000446823	8				ZNF404
FOXK1	ENSG00000164916	ENST00000328914	4				ZNF45
RBAK	ENSG00000146587	ENST00000353796	9				ZNF221
RBAK	ENSG00000146587	ENST00000396912	8				ZNF155
ZNF853	ENSG00000236609	ENST00000457543	2				ZNF230
ETV1	ENSG00000006468	ENST00000420159	3				ZNF222
ETV1	ENSG00000006468	ENST00000433547	4				ZNF223
ETV1	ENSG00000006468	ENST00000430479	8				ZNF284
ETV1	ENSG00000006468	ENST00000405218	8				ZNF224
ETV1	ENSG00000006468	ENST00000343495	10				ZNF225
ETV1	ENSG00000006468	ENST00000403685	2				ZNF226
ETV1	ENSG00000006468	ENST00000431887	1				ZNF227
ETV1	ENSG00000006468	ENST00000242066	1				ZNF233
MEOX2	ENSG00000106511	ENST00000262041	4				ZNF235
AHR	ENSG00000106546	ENST00000242057	4				ZNF112
TWIST1	ENSG00000122691	ENST00000242261	2				ZNF180
FERD3L	ENSG00000146618	ENST00000275461	2				BCL3
SP8	ENSG00000164651	ENST00000418710	1				RELB
SP4	ENSG00000105866	ENST00000222584	4				ZNF296
NFE2L3	ENSG00000050344	ENST00000056233	2				PPP1R13L
HOXA1	ENSG00000105991	ENST00000343060	0				FOSB
HOXA1	ENSG00000105991	ENST00000355633	0				SIX5
HOXA2	ENSG00000105996	ENST00000222718	1				FOXA3
HOXA3	ENSG00000105997	ENST00000522456	3				HIF3A
HOXA3	ENSG00000105997	ENST00000396352	2				NPAS1
HOXA3	ENSG00000105997	ENST00000317201	6				ZC3H4
HOXA4	ENSG00000197576	ENST00000428284	2				MEIS3
HOXA4	ENSG00000197576	ENST00000360046	2				ZNF541
HOXA3	ENSG00000105997	ENST00000522788	2				TPRX1
HOXA3	ENSG00000105997	ENST00000521779	2				CRX
HOXA5	ENSG00000106004	ENST00000222726	3				ZNF114
HOXA6	ENSG00000106006	ENST00000222728	2				DBP
HOXA7	ENSG00000122592	ENST00000242159	4				TEAD2
HOXA7	ENSG00000122592	ENST00000519842	5				IRF3
HOXA9	ENSG00000078399	ENST00000343483	5				ATF5
HOXA10	ENSG00000253293	ENST00000283921	2				NR1H2
HOXA10	ENSG00000253293	ENST00000396344	2				ZNF175
HOXA11	ENSG00000005073	ENST00000006015	1				ZNF577
HOXA13	ENSG00000106031	ENST00000222753	1				ZNF649
EVX1	ENSG00000106038	ENST00000496902	3				ZNF613
EVX1	ENSG00000106038	ENST00000535619	4				ZNF350
CREB5	ENSG00000146592	ENST00000396299	0				ZNF615
CREB5	ENSG00000146592	ENST00000424599	3				ZNF614
CREB5	ENSG00000146592	ENST00000357727	2				ZNF432
CREB5	ENSG00000146592	ENST00000396300	3				ZNF841
CREB5	ENSG00000146592	ENST00000409603	3				ZNF616
CREB5	ENSG00000146592	ENST00000396298	5				ZNF836
NEUROD6	ENSG00000164600	ENST00000297142	6				ZNF766
TBX20	ENSG00000164532	ENST00000408931	4				ZNF480
POU6F2	ENSG00000106536	ENST00000403058	1				ZNF610
POU6F2	ENSG00000106536	ENST00000518318	1				ZNF880
GLI3	ENSG00000106571	ENST00000448703	4				ZNF528
GLI3	ENSG00000106571	ENST00000395925	4				ZNF534
PURB	ENSG00000146676	ENST00000395699	3				ZNF578
IKZF1	ENSG00000185811	ENST00000359197	4				ZNF808
IKZF1	ENSG00000185811	ENST00000438033	2				ZNF701
IKZF1	ENSG00000185811	ENST00000439701	2				ZNF83
ZNF713	ENSG00000178665	ENST00000429591	1				ZNF611
ZNF479	ENSG00000185177	ENST00000331162	3				ZNF600
ZNF716	ENSG00000182111	ENST00000420713	7				ZNF28
ZNF679	ENSG00000197123	ENST00000421025	7				ZNF468
ZNF679	ENSG00000197123	ENST00000255746	3				ZNF320
ZNF736	ENSG00000234444	ENST00000355095	4				ZNF816
ZNF680	ENSG00000173041	ENST00000309683	6				ZNF160
ZNF107	ENSG00000196247	ENST00000360117	4				ZNF415
ZNF107	ENSG00000196247	ENST00000344930	4				ZNF347
ZNF107	ENSG00000196247	ENST00000423627	8				ZNF665
ZNF107	ENSG00000196247	ENST00000395391	7				ZNF677
ZNF138	ENSG00000197008	ENST00000359735	6				ZNF845
ZNF138	ENSG00000197008	ENST00000397136	3				ZNF765
ZNF273	ENSG00000198039	ENST00000476120	4				ZNF813
ZNF273	ENSG00000198039	ENST00000319636	4				ZNF331
ZNF273	ENSG00000198039	ENST00000545510	4				DPRX
ZNF117	ENSG00000152926	ENST00000282869	6				ZNF628
ZNF92	ENSG00000146757	ENST00000328747	2				ZNF579
ZNF92	ENSG00000146757	ENST00000357512	1				FIZ1
ZNF92	ENSG00000146757	ENST00000450302	1				ZNF524
MLXIPL	ENSG00000009950	ENST00000414749	4				ZNF784
MLXIPL	ENSG00000009950	ENST00000313375	4				ZNF580
PHTF2	ENSG00000006576	ENST00000422959	0				ZNF581
PHTF2	ENSG00000006576	ENST00000275575	0				ZNF787
PHTF2	ENSG00000006576	ENST00000416283	5				ZNF444
PHTF2	ENSG00000006576	ENST00000248550	5				ZSCAN5B
DMTF1	ENSG00000135164	ENST00000394702	3				ZSCAN5A
DMTF1	ENSG00000135164	ENST00000446796	3				ZNF582
DMTF1	ENSG00000135164	ENST00000420131	3				ZNF583
DMTF1	ENSG00000135164	ENST00000414630	3				ZNF667
DMTF1	ENSG00000135164	ENST00000453049	3				ZNF471
DMTF1	ENSG00000135164	ENST00000428819	3				ZFP28
DMTF1	ENSG00000135164	ENST00000432937	2				ZNF470
DMTF1	ENSG00000135164	ENST00000432366	2				ZNF71
DMTF1	ENSG00000135164	ENST00000423590	2				ZNF835
DMTF1	ENSG00000135164	ENST00000394703	2				PEG3
DMTF1	ENSG00000135164	ENST00000579592	2				ZIM3
DMTF1	ENSG00000135164	ENST00000434534	2				DUXA
DMTF1	ENSG00000135164	ENST00000582925	4				ZNF264
DMTF1	ENSG00000135164	ENST00000414194	4				ZNF805
DMTF1	ENSG00000135164	ENST00000425705	6				ZNF460
GATAD1	ENSG00000157259	ENST00000287957	3				ZNF543
DLX6	ENSG00000006377	ENST00000518156	3				ZNF304
DLX6	ENSG00000006377	ENST00000007660	1				ZNF547
DLX5	ENSG00000105880	ENST00000222598	4				ZNF548
BHLHA15	ENSG00000180535	ENST00000609256	3				ZNF17
BHLHA15	ENSG00000180535	ENST00000314018	4				ZNF749
ZNF789	ENSG00000198556	ENST00000331410	6				ZNF772
ZNF789	ENSG00000198556	ENST00000379724	5				ZNF419
ZNF394	ENSG00000160908	ENST00000337673	2				ZNF773
ZKSCAN5	ENSG00000196652	ENST00000326775	4				ZNF549
ZKSCAN5	ENSG00000196652	ENST00000451158	4				ZNF550
ZKSCAN5	ENSG00000196652	ENST00000394170	2				ZNF416
ZNF655	ENSG00000197343	ENST00000320583	0				ZIK1
ZNF655	ENSG00000197343	ENST00000357864	0				ZNF530
ZNF655	ENSG00000197343	ENST00000452314	1				ZNF134
ZNF655	ENSG00000197343	ENST00000252713	1				ZNF211
ZNF655	ENSG00000197343	ENST00000493277	1				ZSCAN4
ZNF655	ENSG00000197343	ENST00000422164	4				ZNF551
ZNF655	ENSG00000197343	ENST00000422647	4				ZNF154
ZNF655	ENSG00000197343	ENST00000424881	4				ZNF671
ZNF655	ENSG00000197343	ENST00000440391	4				ZNF776
ZNF655	ENSG00000197343	ENST00000394163	4				ZNF586
ZSCAN25	ENSG00000197037	ENST00000394152	2				ZNF552
ZSCAN25	ENSG00000197037	ENST00000431485	3				ZNF587
ZSCAN25	ENSG00000197037	ENST00000334715	1				ZNF814
ZSCAN25	ENSG00000197037	ENST00000262941	1				ZNF417
ZKSCAN1	ENSG00000106261	ENST00000324306	1				ZNF418
ZKSCAN1	ENSG00000106261	ENST00000535170	1				ZNF256
ZKSCAN1	ENSG00000106261	ENST00000432317	2				ZNF606
ZSCAN21	ENSG00000166529	ENST00000543588	1				ZSCAN1
ZSCAN21	ENSG00000166529	ENST00000292450	1				ZNF135
ZSCAN21	ENSG00000166529	ENST00000438937	1				ZNF329
ZNF3	ENSG00000166526	ENST00000415068	3				ZNF274
ZNF3	ENSG00000166526	ENST00000303915	0				ZNF544
ZNF3	ENSG00000166526	ENST00000413658	3				ZSCAN22
ZNF3	ENSG00000166526	ENST00000449785	3				ZNF497
ZNF3	ENSG00000166526	ENST00000299667	3				ZNF837
ZNF3	ENSG00000166526	ENST00000424697	3				ZNF584
ZNF3	ENSG00000166526	ENST00000428683	0				ZNF132
TSC22D4	ENSG00000166925	ENST00000300181	2				ZNF324B
CUX1	ENSG00000257923	ENST00000437600	3				ZNF324
CUX1	ENSG00000257923	ENST00000292538	3				ZNF446
CUX1	ENSG00000257923	ENST00000393824	3				ZBTB45
CUX1	ENSG00000257923	ENST00000547394	3				MZF1
CUX1	ENSG00000257923	ENST00000360264	3				SOX12
CUX1	ENSG00000257923	ENST00000292535	3				TCF15
CUX1	ENSG00000257923	ENST00000550008	3				SCRT2
DNAJC2	ENSG00000105821	ENST00000249270	2				ZNF343
DNAJC2	ENSG00000105821	ENST00000379263	1				EBF4
HBP1	ENSG00000105856	ENST00000468410	2				OVOL2
HBP1	ENSG00000105856	ENST00000478930	2				ZNF133
HBP1	ENSG00000105856	ENST00000464009	2				INSM1
HBP1	ENSG00000105856	ENST00000222574	2				NKX2-4
HBP1	ENSG00000105856	ENST00000468401	7				NKX2-2
HBP1	ENSG00000105856	ENST00000497535	8				PAX1
HBP1	ENSG00000105856	ENST00000485846	8				FOXA2
HBP1	ENSG00000105856	ENST00000479011	3				GZF1
HBP1	ENSG00000105856	ENST00000498408	1				VSX1
THAP5	ENSG00000177683	ENST00000313516	2				ZNF337
THAP5	ENSG00000177683	ENST00000415914	2				ID1
ZNF277	ENSG00000198839	ENST00000361822	1				FOXS1
FOXP2	ENSG00000128573	ENST00000393500	1				PLAGL2
FOXP2	ENSG00000128573	ENST00000393494	0				DNMT3B
FOXP2	ENSG00000128573	ENST00000403559	2				E2F1
FOXP2	ENSG00000128573	ENST00000350908	2				ZNF341
FOXP2	ENSG00000128573	ENST00000393489	2				TGIF2
FOXP2	ENSG00000128573	ENST00000360232	0				MAFB
FOXP2	ENSG00000128573	ENST00000393491	0				ZHX3
TFEC	ENSG00000105967	ENST00000457268	1				L3MBTL1
TFEC	ENSG00000105967	ENST00000265440	0				MYBL2
TFEC	ENSG00000105967	ENST00000393485	0				TOX2
TFEC	ENSG00000105967	ENST00000320239	1				HNF4A
FEZF1	ENSG00000128610	ENST00000331178	4				RBPJL
FEZF1	ENSG00000128610	ENST00000427185	4				ZNF335
FEZF1	ENSG00000128610	ENST00000442488	4				ZNF334
FEZF1	ENSG00000128610	ENST00000418046	2				NCOA3
ZNF800	ENSG00000048405	ENST00000436992	6				ZNFX1
ZNF800	ENSG00000048405	ENST00000393312	7				SNAI1
ZNF800	ENSG00000048405	ENST00000393313	3				CEBPB
ZNF800	ENSG00000048405	ENST00000265827	3				ADNP
ZNF800	ENSG00000048405	ENST00000434602	1				NFATC2
ZNF800	ENSG00000048405	ENST00000439506	5				SALL4
PAX4	ENSG00000106331	ENST00000341640	3				ZFP64
PAX4	ENSG00000106331	ENST00000338516	3				TSHZ2
IRF5	ENSG00000128604	ENST00000489702	7				ZNF217
IRF5	ENSG00000128604	ENST00000357234	3				TFAP2C
IRF5	ENSG00000128604	ENST00000479582	4				CTCFL
IRF5	ENSG00000128604	ENST00000464557	4				GATA5
IRF5	ENSG00000128604	ENST00000402030	5				TCFL5
IRF5	ENSG00000128604	ENST00000249375	8				BHLHE23
IRF5	ENSG00000128604	ENST00000467002	5				GMEB2
IRF5	ENSG00000128604	ENST00000473745	3				ZGPAT
NRF1	ENSG00000106459	ENST00000393232	5				ZBTB46
NRF1	ENSG00000106459	ENST00000539636	5				ZNF512B
NRF1	ENSG00000106459	ENST00000454688	5				SOX18
NRF1	ENSG00000106459	ENST00000223190	5				MYT1
NRF1	ENSG00000106459	ENST00000393230	3				GABPA
NRF1	ENSG00000106459	ENST00000393231	1				BACH1
CNOT4	ENSG00000080802	ENST00000414802	1				OLIG2
CNOT4	ENSG00000080802	ENST00000428680	2				OLIG1
CNOT4	ENSG00000080802	ENST00000423368	2				RUNX1
CNOT4	ENSG00000080802	ENST00000361528	2				SIM2
CNOT4	ENSG00000080802	ENST00000356162	2				ERG
CNOT4	ENSG00000080802	ENST00000541284	2				ETS2
CREB3L2	ENSG00000182158	ENST00000452463	2				PRDM15
CREB3L2	ENSG00000182158	ENST00000330387	2				ZBTB21
CREB3L2	ENSG00000182158	ENST00000456390	2				PKNOX1
NOBOX	ENSG00000106410	ENST00000223140	2				DNMT3L
NOBOX	ENSG00000106410	ENST00000467773	4				AIRE
ZNF786	ENSG00000197362	ENST00000491431	2				GSC2
ZNF786	ENSG00000197362	ENST00000451334	2				TBX1
ZNF425	ENSG00000204947	ENST00000378061	4				ZNF74
ZNF398	ENSG00000197024	ENST00000426851	3				THAP7
ZNF398	ENSG00000197024	ENST00000420008	3				HIC2
ZNF398	ENSG00000197024	ENST00000475153	3				ZNF280A
ZNF398	ENSG00000197024	ENST00000483892	1				ZNF70
ZNF398	ENSG00000197024	ENST00000491174	1				XBP1
ZNF398	ENSG00000197024	ENST00000540950	1				PATZ1
ZNF398	ENSG00000197024	ENST00000335901	6				ISX
ZNF282	ENSG00000170265	ENST00000262085	0				HMGXB4
ZNF212	ENSG00000170260	ENST00000335870	3				SOX10
ZNF777	ENSG00000196453	ENST00000247930	2				MAFF
ZNF746	ENSG00000181220	ENST00000458143	1				ATF4
ZNF746	ENSG00000181220	ENST00000340622	1				TEF
ZNF467	ENSG00000181444	ENST00000302017	1				PHF5A
ZNF775	ENSG00000196456	ENST00000329630	2				SREBF2
ZNF775	ENSG00000196456	ENST00000490973	3				PPARA
GBX1	ENSG00000164900	ENST00000297537	4				ZBED4
EN2	ENSG00000164778	ENST00000297375	2				SHOX
MNX1	ENSG00000130675	ENST00000543409	3				ZBED1
MNX1	ENSG00000130675	ENST00000252971	4				YY2
ZNF596	ENSG00000172748	ENST00000320552	7				ZFX
ZNF596	ENSG00000172748	ENST00000522866	7				ARX
ZNF705G	ENSG00000215372	ENST00000400078	2				NR0B1
ZNF705G	ENSG00000215372	ENST00000400156	2				ZNF674
SOX7	ENSG00000171056	ENST00000304501	3				ZNF157
SOX7	ENSG00000171056	ENST00000553390	7				ZNF41
GATA4	ENSG00000136574	ENST00000532977	2				ELK1
GATA4	ENSG00000136574	ENST00000526974	1				ZNF81
GATA4	ENSG00000136574	ENST00000335135	3				ZNF182
ZNF705D	ENSG00000215343	ENST00000400085	0				GATA1
EGR3	ENSG00000179388	ENST00000317216	0				TFE3
NKX3-1	ENSG00000167034	ENST00000523261	6				FOXP3
NKX3-1	ENSG00000167034	ENST00000380871	6				KDM5C
NKX2-6	ENSG00000180053	ENST00000418222	3				FOXR2
NKX2-6	ENSG00000180053	ENST00000325017	3				KLF8
EBF2	ENSG00000221818	ENST00000535548	5				ZXDB
EBF2	ENSG00000221818	ENST00000520164	4				ZXDA
HMBOX1	ENSG00000147421	ENST00000403668	0				AR
HMBOX1	ENSG00000147421	ENST00000519662	0				FOXO4
HMBOX1	ENSG00000147421	ENST00000397358	0				NONO
HMBOX1	ENSG00000147421	ENST00000524238	0				TAF1
PURG	ENSG00000172733	ENST00000523392	3				DMRTC1B
PURG	ENSG00000172733	ENST00000339382	4				CDX4
NKX6-3	ENSG00000165066	ENST00000524115	4				ATRX
NKX6-3	ENSG00000165066	ENST00000518699	6				TBX22
KAT6A	ENSG00000083168	ENST00000265713	3				POU3F4
KAT6A	ENSG00000083168	ENST00000426524	3				HDX
THAP1	ENSG00000131931	ENST00000345117	0				ZNF711
THAP1	ENSG00000131931	ENST00000254250	1				TGIF2LX
CEBPD	ENSG00000221869	ENST00000408965	3				ESX1
SNAI2	ENSG00000019549	ENST00000020945	2				TSC22D3
SNAI2	ENSG00000019549	ENST00000396822	2				RHOXF2B
ST18	ENSG00000147488	ENST00000519118	3				RHOXF1
ST18	ENSG00000147488	ENST00000276480	5				RHOXF2
ST18	ENSG00000147488	ENST00000517580	5				ZBTB33
SOX17	ENSG00000164736	ENST00000297316	1				SMARCA1
PLAG1	ENSG00000181690	ENST00000316981	0				ELF4
PLAG1	ENSG00000181690	ENST00000423799	0				ZNF280C
TOX	ENSG00000198846	ENST00000361421	3				ZNF75D
BHLHE22	ENSG00000180828	ENST00000321870	0				ZNF449
MYBL1	ENSG00000185697	ENST00000524176	2				ZIC3
MYBL1	ENSG00000185697	ENST00000522677	3				SOX3
PRDM14	ENSG00000147596	ENST00000276594	2				HSFX1
PRDM14	ENSG00000147596	ENST00000426346	3				ZNF275
NCOA2	ENSG00000140396	ENST00000267974	0				SRY
NCOA2	ENSG00000140396	ENST00000519724	3				ZFY
NCOA2	ENSG00000140396	ENST00000520416	3				TGIF2LY
NCOA2	ENSG00000140396	ENST00000452400	6				HSFY1
MSC	ENSG00000178860	ENST00000325509	1				KDM5D
HNF4G	ENSG00000164749	ENST00000354370	5
HNF4G	ENSG00000164749	ENST00000396423	3
ZFHX4	ENSG00000091656	ENST00000521891	5
ZFHX4	ENSG00000091656	ENST00000050961	5
ZFHX4	ENSG00000091656	ENST00000520307	4
ZFHX4	ENSG00000091656	ENST00000523885	4
ZFHX4	ENSG00000091656	ENST00000517585	1
ZFHX4	ENSG00000091656	ENST00000523809	2
ZFHX4	ENSG00000091656	ENST00000518282	0
HEY1	ENSG00000164683	ENST00000337919	1
HEY1	ENSG00000164683	ENST00000354724	1
E2F5	ENSG00000133740	ENST00000418930	2
E2F5	ENSG00000133740	ENST00000256117	4
E2F5	ENSG00000133740	ENST00000416274	4
E2F5	ENSG00000133740	ENST00000517476	5
E2F5	ENSG00000133740	ENST00000518234	2
OSR2	ENSG00000164920	ENST00000297565	3
OSR2	ENSG00000164920	ENST00000435298	3
OSR2	ENSG00000164920	ENST00000522510	3
OSR2	ENSG00000164920	ENST00000518199	2
GRHL2	ENSG00000083307	ENST00000251808	2
GRHL2	ENSG00000083307	ENST00000521085	2
GRHL2	ENSG00000083307	ENST00000395927	3
KLF10	ENSG00000155090	ENST00000285407	5
ZFPM2	ENSG00000169946	ENST00000407775	1
ZFPM2	ENSG00000169946	ENST00000378472	2
TRPS1	ENSG00000104447	ENST00000520276	1
TRPS1	ENSG00000104447	ENST00000220888	2
TRPS1	ENSG00000104447	ENST00000395715	1
ZHX2	ENSG00000178764	ENST00000314393	2
ZHX2	ENSG00000178764	ENST00000534247	3
ZHX1	ENSG00000165156	ENST00000602651	1
ZHX1	ENSG00000165156	ENST00000297857	1
ZHX1	ENSG00000165156	ENST00000395571	2
ZHX1	ENSG00000165156	ENST00000522655	0
ZNF572	ENSG00000180938	ENST00000319286	1
POU5F1B	ENSG00000212993	ENST00000465342	4
POU5F1B	ENSG00000212993	ENST00000391675	5
MYC	ENSG00000136997	ENST00000377970	2
ZFAT	ENSG00000066827	ENST00000520727	3
ZFAT	ENSG00000066827	ENST00000377838	2
ZFP41	ENSG00000181638	ENST00000520584	4
ZFP41	ENSG00000181638	ENST00000330701	2
GLI4	ENSG00000250571	ENST00000340042	2
GLI4	ENSG00000250571	ENST00000523522	3
ZNF696	ENSG00000185730	ENST00000518575	3
ZNF696	ENSG00000185730	ENST00000330143	7
ZNF696	ENSG00000185730	ENST00000518432	7
MAFA	ENSG00000182759	ENST00000333480	4
ZNF623	ENSG00000183309	ENST00000526926	6
ZNF623	ENSG00000183309	ENST00000458270	4
ZNF623	ENSG00000183309	ENST00000501748	5
ZNF707	ENSG00000181135	ENST00000454097	7
ZNF707	ENSG00000181135	ENST00000534303	7
ZNF707	ENSG00000181135	ENST00000529833	7
ZNF707	ENSG00000181135	ENST00000358656	7
ZNF707	ENSG00000181135	ENST00000526970	8
ZNF707	ENSG00000181135	ENST00000532158	8
ZNF707	ENSG00000181135	ENST00000532205	7
ZNF707	ENSG00000181135	ENST00000418203	4
HSF1	ENSG00000185122	ENST00000528838	0
TONSL	ENSG00000160949	ENST00000409379	2
FOXH1	ENSG00000160973	ENST00000377317	5
ZNF251	ENSG00000198169	ENST00000292562	2
ZNF34	ENSG00000196378	ENST00000343459	9
ZNF34	ENSG00000196378	ENST00000429371	8
ZNF517	ENSG00000197363	ENST00000359971	12
ZNF517	ENSG00000197363	ENST00000531720	6
ZNF7	ENSG00000147789	ENST00000325241	6
ZNF7	ENSG00000147789	ENST00000544249	5
ZNF7	ENSG00000147789	ENST00000528372	4
ZNF250	ENSG00000196150	ENST00000543949	1
ZNF250	ENSG00000196150	ENST00000292579	1
ZNF250	ENSG00000196150	ENST00000342660	1
ZNF16	ENSG00000170631	ENST00000527811	5
ZNF16	ENSG00000170631	ENST00000532351	3
ZNF16	ENSG00000170631	ENST00000276816	2
FOXD4	ENSG00000170122	ENST00000382500	9
DMRT1	ENSG00000137090	ENST00000382276	4
DMRT3	ENSG00000064218	ENST00000190165	9
DMRT3	ENSG00000064218	ENST00000417254	8
DMRT2	ENSG00000173253	ENST00000382255	2
DMRT2	ENSG00000173253	ENST00000412350	2
DMRT2	ENSG00000173253	ENST00000302441	6
DMRT2	ENSG00000173253	ENST00000358146	2
RFX3	ENSG00000080298	ENST00000449234	3
RFX3	ENSG00000080298	ENST00000458034	3
RFX3	ENSG00000080298	ENST00000442560	5
RFX3	ENSG00000080298	ENST00000381984	4
RFX3	ENSG00000080298	ENST00000358730	4
RFX3	ENSG00000080298	ENST00000457373	2
RFX3	ENSG00000080298	ENST00000451859	2
RFX3	ENSG00000080298	ENST00000382004	5
RFX3	ENSG00000080298	ENST00000449190	5
GLIS3	ENSG00000107249	ENST00000462164	14
GLIS3	ENSG00000107249	ENST00000478315	4
GLIS3	ENSG00000107249	ENST00000324333	4
GLIS3	ENSG00000107249	ENST00000478844	4
GLIS3	ENSG00000107249	ENST00000381971	6
NFIB	ENSG00000147862	ENST00000543693	3
NFIB	ENSG00000147862	ENST00000380953	1
NFIB	ENSG00000147862	ENST00000380959	2
NFIB	ENSG00000147862	ENST00000397575	2
NFIB	ENSG00000147862	ENST00000397581	3
NFIB	ENSG00000147862	ENST00000380934	7
BNC2	ENSG00000173068	ENST00000545497	3
BNC2	ENSG00000173068	ENST00000380672	4
BNC2	ENSG00000173068	ENST00000380666	5
DMRTA1	ENSG00000176399	ENST00000325870	8
NFX1	ENSG00000086102	ENST00000379540	4
NFX1	ENSG00000086102	ENST00000379521	4
NFX1	ENSG00000086102	ENST00000318524	3
ARID3C	ENSG00000205143	ENST00000378909	2
CREB3	ENSG00000107175	ENST00000353704	2
PAX5	ENSG00000196092	ENST00000358127	3
ZBTB5	ENSG00000168795	ENST00000307750	4
FOXD4L5	ENSG00000204779	ENST00000377420	1
FOXD4L4	ENSG00000184659	ENST00000377413	0
FOXD4L3	ENSG00000187559	ENST00000342833	0
KLF9	ENSG00000119138	ENST00000377126	1
RORB	ENSG00000198963	ENST00000376896	2
RORB	ENSG00000198963	ENST00000396204	3
FOXB2	ENSG00000204612	ENST00000376708	2
NFIL3	ENSG00000165030	ENST00000297689	2
ZNF484	ENSG00000127081	ENST00000395505	7
ZNF484	ENSG00000127081	ENST00000395506	1
ZNF484	ENSG00000127081	ENST00000375495	1
ZNF484	ENSG00000127081	ENST00000332591	1
BARX1	ENSG00000131668	ENST00000401724	3
BARX1	ENSG00000131668	ENST00000253968	0
ZNF169	ENSG00000175787	ENST00000395395	2
ZNF169	ENSG00000175787	ENST00000375354	3
ZNF510	ENSG00000081386	ENST00000223428	5
ZNF510	ENSG00000081386	ENST00000375231	5
ZNF510	ENSG00000081386	ENST00000374641	5
ZNF782	ENSG00000196597	ENST00000478850	8
ZNF782	ENSG00000196597	ENST00000481138	7
ZNF782	ENSG00000196597	ENST00000535338	0
FOXE1	ENSG00000178919	ENST00000375123	6
NR4A3	ENSG00000119508	ENST00000338488	1
NR4A3	ENSG00000119508	ENST00000330847	0
ZNF189	ENSG00000136870	ENST00000374861	2
ZNF189	ENSG00000136870	ENST00000339664	2
TAL2	ENSG00000186051	ENST00000334077	2
ZNF462	ENSG00000148143	ENST00000457913	3
ZNF462	ENSG00000148143	ENST00000542028	0
KLF4	ENSG00000136826	ENST00000374672	2
KLF4	ENSG00000136826	ENST00000420475	2
ZNF483	ENSG00000173258	ENST00000358151	6
ZNF483	ENSG00000173258	ENST00000355824	6
ZNF483	ENSG00000173258	ENST00000374374	6
ZNF483	ENSG00000173258	ENST00000309235	7
ZFP37	ENSG00000136866	ENST00000553380	2
ZFP37	ENSG00000136866	ENST00000374227	2
ZFP37	ENSG00000136866	ENST00000555206	2
ZNF618	ENSG00000157657	ENST00000374126	1
ZNF618	ENSG00000157657	ENST00000452710	1
DEC1	ENSG00000173077	ENST00000374016	4
LHX6	ENSG00000106852	ENST00000559895	2
LHX6	ENSG00000106852	ENST00000373755	0
LHX6	ENSG00000106852	ENST00000541397	3
LHX6	ENSG00000106852	ENST00000560485	3
LHX6	ENSG00000106852	ENST00000394319	1
LHX6	ENSG00000106852	ENST00000340587	1
RC3H2	ENSG00000056586	ENST00000471874	3
RC3H2	ENSG00000056586	ENST00000373670	4
RC3H2	ENSG00000056586	ENST00000335387	1
RC3H2	ENSG00000056586	ENST00000357244	1
RC3H2	ENSG00000056586	ENST00000423239	1
ZBTB6	ENSG00000186130	ENST00000373659	2
ZBTB26	ENSG00000171448	ENST00000373654	3
ZBTB26	ENSG00000171448	ENST00000373656	3
LHX2	ENSG00000106689	ENST00000373615	2
NR5A1	ENSG00000136931	ENST00000373587	0
NR5A1	ENSG00000136931	ENST00000455734	0
NR5A1	ENSG00000136931	ENST00000373588	0
NR6A1	ENSG00000148200	ENST00000487099	0
NR6A1	ENSG00000148200	ENST00000416460	0
PBX3	ENSG00000167081	ENST00000342287	3
PBX3	ENSG00000167081	ENST00000373489	2
PBX3	ENSG00000167081	ENST00000373483	2
PBX3	ENSG00000167081	ENST00000491787	4
PBX3	ENSG00000167081	ENST00000447726	4
LMX1B	ENSG00000136944	ENST00000526117	1
LMX1B	ENSG00000136944	ENST00000561065	1
ZBTB43	ENSG00000169155	ENST00000449886	9
ZBTB43	ENSG00000169155	ENST00000373464	9
ZBTB43	ENSG00000169155	ENST00000450858	9
ZBTB43	ENSG00000169155	ENST00000373457	5
ZBTB34	ENSG00000177125	ENST00000319119	4
ZBTB34	ENSG00000177125	ENST00000373452	3
ZNF79	ENSG00000196152	ENST00000342483	2
ZNF79	ENSG00000196152	ENST00000543471	1
PRRX2	ENSG00000167157	ENST00000372469	3
BARHL1	ENSG00000125492	ENST00000263610	7
BARHL1	ENSG00000125492	ENST00000542090	3
GFI1B	ENSG00000165702	ENST00000372124	5
GFI1B	ENSG00000165702	ENST00000339463	5
GFI1B	ENSG00000165702	ENST00000450530	4
GFI1B	ENSG00000165702	ENST00000372123	5
RXRA	ENSG00000186350	ENST00000481739	1
RXRA	ENSG00000186350	ENST00000540193	4
SOHLH1	ENSG00000165643	ENST00000298466	6
LHX3	ENSG00000107187	ENST00000371746	5
LHX3	ENSG00000107187	ENST00000371748	9
SNAPC4	ENSG00000165684	ENST00000298532	3
KLF6	ENSG00000067082	ENST00000469435	5
KLF6	ENSG00000067082	ENST00000497571	5
KLF6	ENSG00000067082	ENST00000542957	5
GATA3	ENSG00000107485	ENST00000379328	6
GATA3	ENSG00000107485	ENST00000346208	6
DNAJC1	ENSG00000136770	ENST00000447548	2
DNAJC1	ENSG00000136770	ENST00000376980	0
DNAJC1	ENSG00000136770	ENST00000376946	0
PTF1A	ENSG00000168267	ENST00000376504	5
MKX	ENSG00000150051	ENST00000561227	2
MKX	ENSG00000150051	ENST00000419761	1
MKX	ENSG00000150051	ENST00000375790	1
ZNF438	ENSG00000183621	ENST00000444692	3
ZNF438	ENSG00000183621	ENST00000331737	0
ZNF438	ENSG00000183621	ENST00000538351	0
ZNF438	ENSG00000183621	ENST00000436087	11
ZEB1	ENSG00000148516	ENST00000320985	0
ZEB1	ENSG00000148516	ENST00000361642	0
ZEB1	ENSG00000148516	ENST00000560721	0
ZEB1	ENSG00000148516	ENST00000424869	0
ZEB1	ENSG00000148516	ENST00000542815	0
ZEB1	ENSG00000148516	ENST00000446923	2
ZEB1	ENSG00000148516	ENST00000559476	2
CREM	ENSG00000095794	ENST00000374726	5
CREM	ENSG00000095794	ENST00000354759	5
CREM	ENSG00000095794	ENST00000489321	3
CREM	ENSG00000095794	ENST00000427847	3
CREM	ENSG00000095794	ENST00000395895	3
CREM	ENSG00000095794	ENST00000333809	5
CREM	ENSG00000095794	ENST00000337656	5
CREM	ENSG00000095794	ENST00000348787	4
CREM	ENSG00000095794	ENST00000361599	4
CREM	ENSG00000095794	ENST00000484283	4
CREM	ENSG00000095794	ENST00000342105	5
CREM	ENSG00000095794	ENST00000463960	5
CREM	ENSG00000095794	ENST00000487763	2
CREM	ENSG00000095794	ENST00000488328	2
CREM	ENSG00000095794	ENST00000356917	2
CREM	ENSG00000095794	ENST00000488741	0
CREM	ENSG00000095794	ENST00000474931	0
CREM	ENSG00000095794	ENST00000344351	0
CREM	ENSG00000095794	ENST00000490511	1
ZNF248	ENSG00000198105	ENST00000374648	3
ZNF248	ENSG00000198105	ENST00000395867	4
ZNF248	ENSG00000198105	ENST00000395873	2
ZNF248	ENSG00000198105	ENST00000357328	3
ZNF248	ENSG00000198105	ENST00000395874	3
ZNF25	ENSG00000175395	ENST00000302609	1
ZNF33A	ENSG00000189180	ENST00000374618	2
ZNF33A	ENSG00000189180	ENST00000432900	2
ZNF33A	ENSG00000189180	ENST00000458705	2
ZNF33A	ENSG00000189180	ENST00000307441	2
ZNF37A	ENSG00000075407	ENST00000351773	18
ZNF37A	ENSG00000075407	ENST00000361085	18
ZNF33B	ENSG00000196693	ENST00000359467	8
ZNF239	ENSG00000196793	ENST00000306006	3
ZNF239	ENSG00000196793	ENST00000374446	1
ZNF239	ENSG00000196793	ENST00000426961	1
ZNF485	ENSG00000198298	ENST00000374437	3
ZNF485	ENSG00000198298	ENST00000430885	3
ZNF485	ENSG00000198298	ENST00000374435	3
ZNF32	ENSG00000169740	ENST00000395797	4
ZNF32	ENSG00000169740	ENST00000374433	7
ZNF22	ENSG00000165512	ENST00000298299	4
DRGX	ENSG00000165606	ENST00000434016	1
DRGX	ENSG00000165606	ENST00000374139	1
TFAM	ENSG00000108064	ENST00000487519	1
TFAM	ENSG00000108064	ENST00000373895	6
TFAM	ENSG00000108064	ENST00000395377	7
ARID5B	ENSG00000150347	ENST00000279873	2
ARID5B	ENSG00000150347	ENST00000309334	5
EGR2	ENSG00000122877	ENST00000242480	1
EGR2	ENSG00000122877	ENST00000411732	1
EGR2	ENSG00000122877	ENST00000439032	6
ATOH7	ENSG00000179774	ENST00000373673	1
TET1	ENSG00000138336	ENST00000373644	4
NEUROG3	ENSG00000122859	ENST00000242462	2
KAT6B	ENSG00000156650	ENST00000372724	1
KAT6B	ENSG00000156650	ENST00000287239	1
HHEX	ENSG00000152804	ENST00000282728	3
NKX2-3	ENSG00000119919	ENST00000344586	8
PAX2	ENSG00000075891	ENST00000361791	4
TLX1	ENSG00000107807	ENST00000370196	3
TLX1	ENSG00000107807	ENST00000467928	1
LBX1	ENSG00000138136	ENST00000370193	1
NFKB2	ENSG00000077150	ENST00000601386	2
NFKB2	ENSG00000077150	ENST00000428099	3
NFKB2	ENSG00000077150	ENST00000369966	2
NFKB2	ENSG00000077150	ENST00000471698	1
NFKB2	ENSG00000077150	ENST00000189444	1
MXI1	ENSG00000119950	ENST00000332674	2
MXI1	ENSG00000119950	ENST00000453116	3
MXI1	ENSG00000119950	ENST00000361248	2
MXI1	ENSG00000119950	ENST00000239007	2
MXI1	ENSG00000119950	ENST00000393134	1
MXI1	ENSG00000119950	ENST00000442296	6
MXI1	ENSG00000119950	ENST00000369612	9
TCF7L2	ENSG00000148737	ENST00000534894	4
TCF7L2	ENSG00000148737	ENST00000349937	4
TCF7L2	ENSG00000148737	ENST00000352065	6
TCF7L2	ENSG00000148737	ENST00000369395	6
TCF7L2	ENSG00000148737	ENST00000542695	7
TCF7L2	ENSG00000148737	ENST00000346198	5
TCF7L2	ENSG00000148737	ENST00000369389	1
TCF7L2	ENSG00000148737	ENST00000277945	0
TCF7L2	ENSG00000148737	ENST00000369386	2
VAX1	ENSG00000148704	ENST00000369206	7
VAX1	ENSG00000148704	ENST00000277905	4
EMX2	ENSG00000170370	ENST00000553456	4
EMX2	ENSG00000170370	ENST00000442245	3
IKZF5	ENSG00000095574	ENST00000368886	9
HMX3	ENSG00000188620	ENST00000357878	1
HMX2	ENSG00000188816	ENST00000339992	5
NKX1-2	ENSG00000229544	ENST00000440536	9
FOXI2	ENSG00000186766	ENST00000388920	4
EBF3	ENSG00000108001	ENST00000440978	4
EBF3	ENSG00000108001	ENST00000368648	2
NKX6-2	ENSG00000148826	ENST00000368592	2
UTF1	ENSG00000171794	ENST00000304477	5
VENTX	ENSG00000151650	ENST00000325980	2
ZNF511	ENSG00000198546	ENST00000361518	4
ZNF511	ENSG00000198546	ENST00000359035	5
ZNF511	ENSG00000198546	ENST00000368554	2
IRF7	ENSG00000185507	ENST00000348655	3
IRF7	ENSG00000185507	ENST00000397566	3
IRF7	ENSG00000185507	ENST00000397562	2
IRF7	ENSG00000185507	ENST00000330243	2
IRF7	ENSG00000185507	ENST00000397570	2
DEAF1	ENSG00000177030	ENST00000338675	0
DEAF1	ENSG00000177030	ENST00000382409	7
ASCL2	ENSG00000183734	ENST00000331289	8
ZNF195	ENSG00000005801	ENST00000343338	4
ZNF195	ENSG00000005801	ENST00000005082	7
ZNF195	ENSG00000005801	ENST00000534569	7
ZNF195	ENSG00000005801	ENST00000529678	7
ZNF195	ENSG00000005801	ENST00000354599	7
ZNF195	ENSG00000005801	ENST00000526601	7
ZNF195	ENSG00000005801	ENST00000399602	7
ZNF195	ENSG00000005801	ENST00000429541	6
ZNF215	ENSG00000149054	ENST00000278319	2
ZNF215	ENSG00000149054	ENST00000414517	2
ZNF214	ENSG00000149050	ENST00000536068	3
ZNF214	ENSG00000149050	ENST00000278314	3
ASCL3	ENSG00000176009	ENST00000531618	8
ASCL3	ENSG00000176009	ENST00000325884	3
ZNF143	ENSG00000166478	ENST00000531943	3
ZNF143	ENSG00000166478	ENST00000396602	4
ZNF143	ENSG00000166478	ENST00000396597	4
ZNF143	ENSG00000166478	ENST00000438144	4
ZNF143	ENSG00000166478	ENST00000534265	4
ZNF143	ENSG00000166478	ENST00000412390	4
ZNF143	ENSG00000166478	ENST00000414370	5
ZNF143	ENSG00000166478	ENST00000417726	5
TEAD1	ENSG00000187079	ENST00000361905	2
TEAD1	ENSG00000187079	ENST00000527636	2
TEAD1	ENSG00000187079	ENST00000527376	2
TEAD1	ENSG00000187079	ENST00000334310	2
TEAD1	ENSG00000187079	ENST00000361985	0
ARNTL	ENSG00000133794	ENST00000529050	5
ARNTL	ENSG00000133794	ENST00000527998	7
ARNTL	ENSG00000133794	ENST00000396441	6
ARNTL	ENSG00000133794	ENST00000533520	6
ARNTL	ENSG00000133794	ENST00000529825	6
ARNTL	ENSG00000133794	ENST00000389707	6
ARNTL	ENSG00000133794	ENST00000529388	6
ARNTL	ENSG00000133794	ENST00000530357	5
ARNTL	ENSG00000133794	ENST00000361003	5
ARNTL	ENSG00000133794	ENST00000403510	5
ARNTL	ENSG00000133794	ENST00000482049	5
SOX6	ENSG00000110693	ENST00000316399	2
SOX6	ENSG00000110693	ENST00000526673	1
SOX6	ENSG00000110693	ENST00000533411	3
SOX6	ENSG00000110693	ENST00000528429	2
SOX6	ENSG00000110693	ENST00000528252	4
SOX6	ENSG00000110693	ENST00000529469	3
SOX6	ENSG00000110693	ENST00000352083	1
MYOD1	ENSG00000129152	ENST00000250003	4
E2F8	ENSG00000129173	ENST00000250024	1
E2F8	ENSG00000129173	ENST00000527884	2
DBX1	ENSG00000109851	ENST00000227256	6
DBX1	ENSG00000109851	ENST00000524983	2
PAX6	ENSG00000007372	ENST00000379107	1
PAX6	ENSG00000007372	ENST00000379109	1
PAX6	ENSG00000007372	ENST00000379111	0
PAX6	ENSG00000007372	ENST00000438681	0
PAX6	ENSG00000007372	ENST00000241001	0
PAX6	ENSG00000007372	ENST00000379115	0
PAX6	ENSG00000007372	ENST00000379123	1
PAX6	ENSG00000007372	ENST00000524853	1
PAX6	ENSG00000007372	ENST00000525535	2
PAX6	ENSG00000007372	ENST00000423822	2
PAX6	ENSG00000007372	ENST00000419022	3
WT1	ENSG00000184937	ENST00000379079	7
WT1	ENSG00000184937	ENST00000452863	2
WT1	ENSG00000184937	ENST00000448076	5
WT1	ENSG00000184937	ENST00000332351	6
ELF5	ENSG00000135374	ENST00000312319	3
ELF5	ENSG00000135374	ENST00000257832	4
EHF	ENSG00000135373	ENST00000257831	3
EHF	ENSG00000135373	ENST00000530286	3
ALX4	ENSG00000052850	ENST00000329255	1
CREB3L1	ENSG00000157613	ENST00000529193	1
CREB3L1	ENSG00000157613	ENST00000288400	1
ZNF408	ENSG00000175213	ENST00000311764	2
NR1H3	ENSG00000025434	ENST00000436778	2
NR1H3	ENSG00000025434	ENST00000407404	2
NR1H3	ENSG00000025434	ENST00000444396	2
NR1H3	ENSG00000025434	ENST00000457932	2
NR1H3	ENSG00000025434	ENST00000449369	2
NR1H3	ENSG00000025434	ENST00000441012	2
NR1H3	ENSG00000025434	ENST00000437276	2
NR1H3	ENSG00000025434	ENST00000467728	1
NR1H3	ENSG00000025434	ENST00000405853	0
SPI1	ENSG00000066336	ENST00000227163	1
SPI1	ENSG00000066336	ENST00000378538	2
SSRP1	ENSG00000149136	ENST00000278412	6
ZFP91	ENSG00000186660	ENST00000316059	5
MYRF	ENSG00000124920	ENST00000278836	3
MYRF	ENSG00000124920	ENST00000265460	1
MYRF	ENSG00000124920	ENST00000327797	2
MTA2	ENSG00000149480	ENST00000278823	4
RCOR2	ENSG00000167771	ENST00000301459	2
ESRRA	ENSG00000173153	ENST00000406310	3
ESRRA	ENSG00000173153	ENST00000000442	3
ESRRA	ENSG00000173153	ENST00000405666	2
ESRRA	ENSG00000173153	ENST00000468670	3
BATF2	ENSG00000168062	ENST00000301887	2
RELA	ENSG00000173039	ENST00000308639	3
RELA	ENSG00000173039	ENST00000406246	3
KAT5	ENSG00000172977	ENST00000377046	1
KAT5	ENSG00000172977	ENST00000352980	1
KAT5	ENSG00000172977	ENST00000341318	0
OVOL1	ENSG00000172818	ENST00000335987	3
FOSL1	ENSG00000175592	ENST00000312562	3
NPAS4	ENSG00000174576	ENST00000311034	1
KDM2A	ENSG00000173120	ENST00000398645	1
KDM2A	ENSG00000173120	ENST00000529006	0
KDM2A	ENSG00000173120	ENST00000308783	0
TBX10	ENSG00000167800	ENST00000335385	6
PHOX2A	ENSG00000165462	ENST00000298231	2
PRKRIR	ENSG00000137492	ENST00000260045	4
CREBZF	ENSG00000137504	ENST00000398294	1
CREBZF	ENSG00000137504	ENST00000527447	1
PGR	ENSG00000082175	ENST00000325455	3
ZBTB16	ENSG00000109906	ENST00000335953	2
ZBTB16	ENSG00000109906	ENST00000544220	1
ZBTB16	ENSG00000109906	ENST00000535700	2
ZBTB16	ENSG00000109906	ENST00000392996	3
KMT2A	ENSG00000118058	ENST00000389506	0
FOXR1	ENSG00000176302	ENST00000317011	7
HINFP	ENSG00000172273	ENST00000350777	1
POU2F3	ENSG00000137709	ENST00000260264	2
POU2F3	ENSG00000137709	ENST00000543440	3
BSX	ENSG00000188909	ENST00000343035	1
ZNF202	ENSG00000166261	ENST00000336139	3
PKNOX2	ENSG00000165495	ENST00000298282	1
PKNOX2	ENSG00000165495	ENST00000527238	1
PKNOX2	ENSG00000165495	ENST00000542175	0
PKNOX2	ENSG00000165495	ENST00000531212	3
PKNOX2	ENSG00000165495	ENST00000558705	12
ETS1	ENSG00000134954	ENST00000526145	2
ETS1	ENSG00000134954	ENST00000319397	2
ETS1	ENSG00000134954	ENST00000345075	2
ETS1	ENSG00000134954	ENST00000392668	2
FLI1	ENSG00000151702	ENST00000525560	2
FLI1	ENSG00000151702	ENST00000344954	2
FLI1	ENSG00000151702	ENST00000527767	1
FLI1	ENSG00000151702	ENST00000527786	6
FLI1	ENSG00000151702	ENST00000534087	5
FLI1	ENSG00000151702	ENST00000281428	4
BARX2	ENSG00000043039	ENST00000281437	1
PRDM10	ENSG00000170325	ENST00000526082	0
PRDM10	ENSG00000170325	ENST00000304538	0
PRDM10	ENSG00000170325	ENST00000423662	0
PRDM10	ENSG00000170325	ENST00000358825	2
ZBTB44	ENSG00000196323	ENST00000530205	2
ZBTB44	ENSG00000196323	ENST00000357899	3
ZBTB44	ENSG00000196323	ENST00000397753	3
ZBTB44	ENSG00000196323	ENST00000525842	3
KDM5A	ENSG00000073614	ENST00000399788	5
FOXM1	ENSG00000111206	ENST00000359843	6
FOXM1	ENSG00000111206	ENST00000342628	5
FOXM1	ENSG00000111206	ENST00000361953	5
TEAD4	ENSG00000197905	ENST00000358409	4
TEAD4	ENSG00000197905	ENST00000540314	3
TEAD4	ENSG00000197905	ENST00000536826	3
TEAD4	ENSG00000197905	ENST00000359864	3
TEAD4	ENSG00000197905	ENST00000543035	3
TEAD4	ENSG00000197905	ENST00000397122	4
ZNF384	ENSG00000126746	ENST00000396795	0
ZNF384	ENSG00000126746	ENST00000361959	1
ZNF384	ENSG00000126746	ENST00000319770	1
ZNF384	ENSG00000126746	ENST00000396799	1
NANOGNB	ENSG00000205857	ENST00000382119	1
NANOG	ENSG00000111704	ENST00000229307	5
NANOG	ENSG00000111704	ENST00000526286	3
FOXJ2	ENSG00000065970	ENST00000162391	1
FOXJ2	ENSG00000065970	ENST00000428177	2
ZNF705A	ENSG00000196946	ENST00000402465	4
ZNF705A	ENSG00000196946	ENST00000396570	6
ZNF705A	ENSG00000196946	ENST00000359286	3
YBX3	ENSG00000060138	ENST00000279550	5
YBX3	ENSG00000060138	ENST00000228251	5
ETV6	ENSG00000139083	ENST00000396373	1
CREBL2	ENSG00000111269	ENST00000228865	4
AEBP2	ENSG00000139154	ENST00000398864	3
AEBP2	ENSG00000139154	ENST00000266508	3
AEBP2	ENSG00000139154	ENST00000360995	2
SOX5	ENSG00000134532	ENST00000396007	7
SOX5	ENSG00000134532	ENST00000546136	0
SOX5	ENSG00000134532	ENST00000541536	0
SOX5	ENSG00000134532	ENST00000309359	4
BHLHE41	ENSG00000123095	ENST00000242728	4
ARNTL2	ENSG00000029153	ENST00000544915	2
ARNTL2	ENSG00000029153	ENST00000395901	2
ARNTL2	ENSG00000029153	ENST00000311001	3
ARNTL2	ENSG00000029153	ENST00000542388	6
DBX2	ENSG00000185610	ENST00000332700	3
ARID2	ENSG00000189079	ENST00000334344	1
VDR	ENSG00000111424	ENST00000550314	2
VDR	ENSG00000111424	ENST00000546653	2
VDR	ENSG00000111424	ENST00000549336	2
VDR	ENSG00000111424	ENST00000229022	2
VDR	ENSG00000111424	ENST00000548664	2
VDR	ENSG00000111424	ENST00000395324	12
ZNF641	ENSG00000167528	ENST00000550342	3
ZNF641	ENSG00000167528	ENST00000544117	4
ZNF641	ENSG00000167528	ENST00000548932	4
ZNF641	ENSG00000167528	ENST00000301042	4
ZNF641	ENSG00000167528	ENST00000448928	3
ZNF641	ENSG00000167528	ENST00000550181	1
KMT2D	ENSG00000167548	ENST00000301067	1
KMT2D	ENSG00000167548	ENST00000547610	0
ATF1	ENSG00000123268	ENST00000552510	6
ATF1	ENSG00000123268	ENST00000262053	1
ATF1	ENSG00000123268	ENST00000539132	5
ATF1	ENSG00000123268	ENST00000552487	5
CSRNP2	ENSG00000110925	ENST00000552899	0
[truncated: 1,959 more rows]

## Sheet: HTH
HGNC Gene Name	Ensembl Gene ID	Ensembl Transcript ID	SNP count				unique HGNC Gene Name only		Genes	383	Transcripts	921
RERE	ENSG00000142599	ENST00000476556	3				RERE
RERE	ENSG00000142599	ENST00000488215	1				PAX7
RERE	ENSG00000142599	ENST00000468247	0				E2F2
RERE	ENSG00000142599	ENST00000337907	5				ARID1A
RERE	ENSG00000142599	ENST00000400908	4				POU3F1
PAX7	ENSG00000009709	ENST00000375375	3				FOXJ3
PAX7	ENSG00000009709	ENST00000420770	2				DMAP1
PAX7	ENSG00000009709	ENST00000400661	2				DMBX1
E2F2	ENSG00000007968	ENST00000361729	3				FOXE3
ARID1A	ENSG00000117713	ENST00000324856	0				FOXD2
ARID1A	ENSG00000117713	ENST00000540690	0				FOXD3
POU3F1	ENSG00000185668	ENST00000373012	1				MIER1
FOXJ3	ENSG00000198815	ENST00000545068	3				LHX8
FOXJ3	ENSG00000198815	ENST00000361346	9				BARHL2
FOXJ3	ENSG00000198815	ENST00000372573	3				ALX3
DMAP1	ENSG00000178028	ENST00000361745	1				PHTF1
DMAP1	ENSG00000178028	ENST00000446292	1				RFX5
DMAP1	ENSG00000178028	ENST00000440641	1				ETV3
DMAP1	ENSG00000178028	ENST00000436069	1				PBX1
DMAP1	ENSG00000178028	ENST00000315913	1				LMX1A
DMAP1	ENSG00000178028	ENST00000372289	1				POU2F1
DMAP1	ENSG00000178028	ENST00000372290	2				PRRX1
DMBX1	ENSG00000197587	ENST00000371956	5				LHX4
DMBX1	ENSG00000197587	ENST00000360032	5				LHX9
FOXE3	ENSG00000186790	ENST00000335071	0				ELF3
FOXD2	ENSG00000186564	ENST00000334793	3				KDM5B
FOXD3	ENSG00000187140	ENST00000371116	4				ELK4
MIER1	ENSG00000198160	ENST00000371018	4				IRF6
MIER1	ENSG00000198160	ENST00000357692	4				RCOR3
MIER1	ENSG00000198160	ENST00000401041	4				PROX1
MIER1	ENSG00000198160	ENST00000401042	1				HLX
LHX8	ENSG00000162624	ENST00000294638	3				MIXL1
LHX8	ENSG00000162624	ENST00000356261	3				ARID4B
BARHL2	ENSG00000143032	ENST00000370445	5				E2F6
ALX3	ENSG00000156150	ENST00000369792	4				MTA3
PHTF1	ENSG00000116793	ENST00000447664	3				SIX3
PHTF1	ENSG00000116793	ENST00000393357	3				SIX2
PHTF1	ENSG00000116793	ENST00000446739	3				FOXN2
PHTF1	ENSG00000116793	ENST00000369598	3				OTX1
PHTF1	ENSG00000116793	ENST00000369600	3				MEIS1
PHTF1	ENSG00000116793	ENST00000369604	3				VAX2
RFX5	ENSG00000143390	ENST00000458484	0				EMX1
RFX5	ENSG00000143390	ENST00000392746	1				NOTO
RFX5	ENSG00000143390	ENST00000436271	1				LBX2
RFX5	ENSG00000143390	ENST00000450506	1				TLX2
RFX5	ENSG00000143390	ENST00000422595	1				ARID5A
RFX5	ENSG00000143390	ENST00000430227	2				RFX8
RFX5	ENSG00000143390	ENST00000290524	2				POU3F3
RFX5	ENSG00000143390	ENST00000437327	2				PAX8
RFX5	ENSG00000143390	ENST00000452513	2				FOXD4L1
RFX5	ENSG00000143390	ENST00000368870	2				EN1
RFX5	ENSG00000143390	ENST00000452671	3				ZEB2
ETV3	ENSG00000117036	ENST00000368192	6				DLX1
ETV3	ENSG00000117036	ENST00000326786	6				DLX2
PBX1	ENSG00000185630	ENST00000340699	1				EVX2
PBX1	ENSG00000185630	ENST00000420696	2				HOXD12
PBX1	ENSG00000185630	ENST00000401534	3				HOXD11
PBX1	ENSG00000185630	ENST00000540246	5				HOXD10
LMX1A	ENSG00000162761	ENST00000367893	6				HOXD9
LMX1A	ENSG00000162761	ENST00000294816	6				HOXD8
LMX1A	ENSG00000162761	ENST00000342310	1				HOXD3
POU2F1	ENSG00000143190	ENST00000367866	2				HOXD4
POU2F1	ENSG00000143190	ENST00000452019	2				HOXD1
POU2F1	ENSG00000143190	ENST00000541643	2				SATB2
POU2F1	ENSG00000143190	ENST00000367862	1				FEV
PRRX1	ENSG00000116132	ENST00000367760	5				PAX3
PRRX1	ENSG00000116132	ENST00000239461	9				GBX2
LHX4	ENSG00000121454	ENST00000263726	2				SATB1
LHX9	ENSG00000143355	ENST00000367390	2				SMARCC1
LHX9	ENSG00000143355	ENST00000367387	3				HESX1
ELF3	ENSG00000163435	ENST00000359651	4				FOXP1
ELF3	ENSG00000163435	ENST00000367284	5				POU1F1
ELF3	ENSG00000163435	ENST00000367283	5				ARGFX
ELF3	ENSG00000163435	ENST00000446188	5				FOXL2
KDM5B	ENSG00000117139	ENST00000367264	5				TFDP2
KDM5B	ENSG00000117139	ENST00000367265	2				SHOX2
ELK4	ENSG00000158711	ENST00000357992	3				ETV5
IRF6	ENSG00000117595	ENST00000456314	2				NKX1-1
IRF6	ENSG00000117595	ENST00000367021	4				MSX1
IRF6	ENSG00000117595	ENST00000542854	6				TADA2B
RCOR3	ENSG00000117625	ENST00000534478	1				HMX1
RCOR3	ENSG00000117625	ENST00000533469	1				NKX3-2
RCOR3	ENSG00000117625	ENST00000367006	2				PHOX2B
RCOR3	ENSG00000117625	ENST00000452621	1				GSX2
RCOR3	ENSG00000117625	ENST00000367005	2				HOPX
PROX1	ENSG00000117707	ENST00000471129	4				NKX6-1
PROX1	ENSG00000117707	ENST00000498508	2				PITX2
PROX1	ENSG00000117707	ENST00000366958	2				ELF2
PROX1	ENSG00000117707	ENST00000435016	4				SMARCA5
PROX1	ENSG00000117707	ENST00000607425	4				POU4F2
PROX1	ENSG00000117707	ENST00000261454	1				IRF2
HLX	ENSG00000136630	ENST00000366903	5				IRX4
MIXL1	ENSG00000185155	ENST00000366810	4				IRX2
ARID4B	ENSG00000054267	ENST00000366603	1				IRX1
ARID4B	ENSG00000054267	ENST00000418304	3				ISL1
ARID4B	ENSG00000054267	ENST00000264183	3				MIER3
ARID4B	ENSG00000054267	ENST00000349213	3				FOXD1
E2F6	ENSG00000169016	ENST00000307236	0				OTP
E2F6	ENSG00000169016	ENST00000381525	3				IRF1
MTA3	ENSG00000057935	ENST00000407270	3				PITX1
MTA3	ENSG00000057935	ENST00000405094	4				POU4F3
SIX3	ENSG00000138083	ENST00000260653	1				CDX1
SIX2	ENSG00000170577	ENST00000303077	1				FOXI1
FOXN2	ENSG00000170802	ENST00000413569	0				TLX3
FOXN2	ENSG00000170802	ENST00000340553	0				NKX2-5
OTX1	ENSG00000115507	ENST00000366671	0				MSX2
OTX1	ENSG00000115507	ENST00000282549	1				PROP1
MEIS1	ENSG00000143995	ENST00000407092	1				IRF4
MEIS1	ENSG00000143995	ENST00000398506	1				FOXQ1
MEIS1	ENSG00000143995	ENST00000444274	1				FOXF2
VAX2	ENSG00000116035	ENST00000234392	6				FOXC1
EMX1	ENSG00000135638	ENST00000258106	4				JARID2
NOTO	ENSG00000214513	ENST00000398468	2				E2F3
LBX2	ENSG00000179528	ENST00000377566	3				POU5F1
LBX2	ENSG00000179528	ENST00000460508	2				PBX2
TLX2	ENSG00000115297	ENST00000233638	1				SPDEF
ARID5A	ENSG00000196843	ENST00000357485	2				TEAD3
RFX8	ENSG00000196460	ENST00000376826	6				ETV7
RFX8	ENSG00000196460	ENST00000428343	6				FOXP4
POU3F3	ENSG00000198914	ENST00000361360	2				TRERF1
PAX8	ENSG00000125618	ENST00000263334	2				CDC5L
PAX8	ENSG00000125618	ENST00000263335	2				POU3F2
PAX8	ENSG00000125618	ENST00000429538	2				FOXO3
FOXD4L1	ENSG00000184492	ENST00000306507	4				RFX6
EN1	ENSG00000163064	ENST00000295206	4				HSF2
ZEB2	ENSG00000169554	ENST00000431672	4				MYB
ZEB2	ENSG00000169554	ENST00000427902	1				ARID1B
ZEB2	ENSG00000169554	ENST00000409487	1				UNCX
ZEB2	ENSG00000169554	ENST00000435831	1				FOXK1
ZEB2	ENSG00000169554	ENST00000392861	0				ETV1
ZEB2	ENSG00000169554	ENST00000409211	0				MEOX2
ZEB2	ENSG00000169554	ENST00000303660	2				HOXA1
ZEB2	ENSG00000169554	ENST00000539609	2				HOXA2
ZEB2	ENSG00000169554	ENST00000444559	2				HOXA3
ZEB2	ENSG00000169554	ENST00000558170	2				HOXA4
DLX1	ENSG00000144355	ENST00000361609	3				HOXA5
DLX1	ENSG00000144355	ENST00000469444	3				HOXA6
DLX1	ENSG00000144355	ENST00000361725	0				HOXA7
DLX1	ENSG00000144355	ENST00000341900	2				HOXA9
DLX2	ENSG00000115844	ENST00000234198	3				HOXA10
EVX2	ENSG00000174279	ENST00000308618	4				HOXA11
HOXD12	ENSG00000170178	ENST00000406506	3				HOXA13
HOXD11	ENSG00000128713	ENST00000249504	2				EVX1
HOXD10	ENSG00000128710	ENST00000249501	5				POU6F2
HOXD9	ENSG00000128709	ENST00000249499	2				PHTF2
HOXD8	ENSG00000175879	ENST00000313173	0				DMTF1
HOXD8	ENSG00000175879	ENST00000544999	2				DLX6
HOXD3	ENSG00000128652	ENST00000432796	3				DLX5
HOXD3	ENSG00000128652	ENST00000468418	1				CUX1
HOXD4	ENSG00000170166	ENST00000306324	3				DNAJC2
HOXD3	ENSG00000128652	ENST00000410016	2				FOXP2
HOXD3	ENSG00000128652	ENST00000249440	3				PAX4
HOXD1	ENSG00000128645	ENST00000331462	3				IRF5
SATB2	ENSG00000119042	ENST00000417098	2				NOBOX
SATB2	ENSG00000119042	ENST00000260926	2				GBX1
SATB2	ENSG00000119042	ENST00000457245	2				EN2
FEV	ENSG00000163497	ENST00000295727	2				MNX1
PAX3	ENSG00000135903	ENST00000409828	5				NKX3-1
PAX3	ENSG00000135903	ENST00000350526	5				NKX2-6
PAX3	ENSG00000135903	ENST00000258387	6				HMBOX1
PAX3	ENSG00000135903	ENST00000409551	6				NKX6-3
PAX3	ENSG00000135903	ENST00000392069	6				MYBL1
PAX3	ENSG00000135903	ENST00000344493	6				ZFHX4
GBX2	ENSG00000168505	ENST00000306318	6				E2F5
SATB1	ENSG00000182568	ENST00000452260	4				ZHX2
SATB1	ENSG00000182568	ENST00000417717	5				ZHX1
SATB1	ENSG00000182568	ENST00000457005	5				POU5F1B
SATB1	ENSG00000182568	ENST00000338745	2				HSF1
SATB1	ENSG00000182568	ENST00000450898	2				FOXH1
SATB1	ENSG00000182568	ENST00000444341	0				FOXD4
SATB1	ENSG00000182568	ENST00000414509	4				RFX3
SATB1	ENSG00000182568	ENST00000454909	4				ARID3C
SATB1	ENSG00000182568	ENST00000440737	0				PAX5
SATB1	ENSG00000182568	ENST00000415069	2				FOXD4L5
SMARCC1	ENSG00000173473	ENST00000254480	1				FOXD4L4
HESX1	ENSG00000163666	ENST00000295934	1				FOXD4L3
HESX1	ENSG00000163666	ENST00000495160	2				FOXB2
FOXP1	ENSG00000114861	ENST00000485326	1				BARX1
FOXP1	ENSG00000114861	ENST00000497553	3				FOXE1
FOXP1	ENSG00000114861	ENST00000498215	2				LHX6
FOXP1	ENSG00000114861	ENST00000475937	4				LHX2
FOXP1	ENSG00000114861	ENST00000318789	2				PBX3
POU1F1	ENSG00000064835	ENST00000344265	4				LMX1B
POU1F1	ENSG00000064835	ENST00000350375	4				PRRX2
ARGFX	ENSG00000186103	ENST00000334384	2				BARHL1
FOXL2	ENSG00000183770	ENST00000330315	2				LHX3
TFDP2	ENSG00000114126	ENST00000397991	3				SNAPC4
TFDP2	ENSG00000114126	ENST00000479040	4				DNAJC1
TFDP2	ENSG00000114126	ENST00000310282	5				MKX
TFDP2	ENSG00000114126	ENST00000497579	5				ZEB1
TFDP2	ENSG00000114126	ENST00000488107	1				DRGX
TFDP2	ENSG00000114126	ENST00000467634	4				ARID5B
TFDP2	ENSG00000114126	ENST00000317104	4				HHEX
TFDP2	ENSG00000114126	ENST00000494358	4				NKX2-3
TFDP2	ENSG00000114126	ENST00000489671	4				PAX2
TFDP2	ENSG00000114126	ENST00000467072	4				TLX1
TFDP2	ENSG00000114126	ENST00000499676	4				LBX1
SHOX2	ENSG00000168779	ENST00000490689	2				VAX1
SHOX2	ENSG00000168779	ENST00000425436	4				EMX2
SHOX2	ENSG00000168779	ENST00000389589	5				HMX3
SHOX2	ENSG00000168779	ENST00000441443	5				HMX2
SHOX2	ENSG00000168779	ENST00000483851	2				NKX1-2
ETV5	ENSG00000244405	ENST00000537818	4				FOXI2
ETV5	ENSG00000244405	ENST00000434744	4				NKX6-2
ETV5	ENSG00000244405	ENST00000413301	3				VENTX
ETV5	ENSG00000244405	ENST00000421809	3				IRF7
ETV5	ENSG00000244405	ENST00000306376	1				TEAD1
ETV5	ENSG00000244405	ENST00000440773	1				E2F8
NKX1-1	ENSG00000235608	ENST00000422806	4				DBX1
MSX1	ENSG00000163132	ENST00000382723	3				PAX6
TADA2B	ENSG00000173011	ENST00000506692	2				ELF5
TADA2B	ENSG00000173011	ENST00000310074	3				EHF
TADA2B	ENSG00000173011	ENST00000512388	2				ALX4
TADA2B	ENSG00000173011	ENST00000515646	2				SPI1
TADA2B	ENSG00000173011	ENST00000510704	2				MTA2
HMX1	ENSG00000215612	ENST00000400677	7				RCOR2
NKX3-2	ENSG00000109705	ENST00000382438	3				PHOX2A
PHOX2B	ENSG00000109132	ENST00000226382	3				FOXR1
GSX2	ENSG00000180613	ENST00000326902	1				POU2F3
HOPX	ENSG00000171476	ENST00000503639	4				BSX
HOPX	ENSG00000171476	ENST00000553379	3				PKNOX2
HOPX	ENSG00000171476	ENST00000381255	3				ETS1
HOPX	ENSG00000171476	ENST00000317745	3				FLI1
HOPX	ENSG00000171476	ENST00000555760	3				BARX2
HOPX	ENSG00000171476	ENST00000556614	3				KDM5A
HOPX	ENSG00000171476	ENST00000508121	3				FOXM1
HOPX	ENSG00000171476	ENST00000556376	3				TEAD4
HOPX	ENSG00000171476	ENST00000381260	5				NANOGNB
HOPX	ENSG00000171476	ENST00000420433	5				NANOG
HOPX	ENSG00000171476	ENST00000337881	6				FOXJ2
NKX6-1	ENSG00000163623	ENST00000295886	5				ETV6
PITX2	ENSG00000164093	ENST00000306732	2				DBX2
PITX2	ENSG00000164093	ENST00000394598	2				ARID2
PITX2	ENSG00000164093	ENST00000355080	2				POU6F1
PITX2	ENSG00000164093	ENST00000354925	2				HOXC13
PITX2	ENSG00000164093	ENST00000511990	2				HOXC12
PITX2	ENSG00000164093	ENST00000511837	2				HOXC11
ELF2	ENSG00000109381	ENST00000379549	3				HOXC10
ELF2	ENSG00000109381	ENST00000358635	3				HOXC6
ELF2	ENSG00000109381	ENST00000379550	1				HOXC9
ELF2	ENSG00000109381	ENST00000394235	3				HOXC8
SMARCA5	ENSG00000153147	ENST00000283131	0				HOXC5
POU4F2	ENSG00000151615	ENST00000281321	2				HOXC4
IRF2	ENSG00000168310	ENST00000510814	5				SMARCC2
IRF2	ENSG00000168310	ENST00000507523	5				E2F7
IRF2	ENSG00000168310	ENST00000506230	3				ALX1
IRF2	ENSG00000168310	ENST00000393593	2				ELK3
IRX4	ENSG00000113430	ENST00000231357	7				SPIC
IRX4	ENSG00000113430	ENST00000505790	6				RFX4
IRX4	ENSG00000113430	ENST00000513692	6				FOXN4
IRX2	ENSG00000170561	ENST00000302057	1				CUX2
IRX2	ENSG00000170561	ENST00000382611	1				LHX5
IRX1	ENSG00000170549	ENST00000302006	2				HNF1A
ISL1	ENSG00000016082	ENST00000230658	2				NCOR2
ISL1	ENSG00000016082	ENST00000511384	2				GSX1
MIER3	ENSG00000155545	ENST00000381199	2				PDX1
MIER3	ENSG00000155545	ENST00000381213	2				CDX2
FOXD1	ENSG00000251493	ENST00000499003	4				FOXO1
OTP	ENSG00000171540	ENST00000306422	3				ELF1
IRF1	ENSG00000125347	ENST00000476613	3				POU4F1
IRF1	ENSG00000125347	ENST00000405885	7				TFDP1
IRF1	ENSG00000125347	ENST00000458069	7				HOMEZ
IRF1	ENSG00000125347	ENST00000245414	8				ZFHX2
PITX1	ENSG00000069011	ENST00000265340	2				IRF9
PITX1	ENSG00000069011	ENST00000506438	2				FOXG1
PITX1	ENSG00000069011	ENST00000502676	2				NKX2-1
PITX1	ENSG00000069011	ENST00000507253	2				NKX2-8
POU4F3	ENSG00000091010	ENST00000230732	1				PAX9
CDX1	ENSG00000113722	ENST00000231656	3				FOXA1
FOXI1	ENSG00000168269	ENST00000306268	5				OTX2
FOXI1	ENSG00000168269	ENST00000449804	5				ARID4A
TLX3	ENSG00000164438	ENST00000296921	4				SIX6
NKX2-5	ENSG00000183072	ENST00000424406	3				SIX1
NKX2-5	ENSG00000183072	ENST00000329198	2				SIX4
MSX2	ENSG00000120149	ENST00000239243	2				ELMSAN1
PROP1	ENSG00000175325	ENST00000308304	4				VSX2
IRF4	ENSG00000137265	ENST00000380956	2				PROX2
FOXQ1	ENSG00000164379	ENST00000296839	6				FOXN3
FOXF2	ENSG00000137273	ENST00000259806	2				GSC
FOXC1	ENSG00000054598	ENST00000380874	3				RCOR1
JARID2	ENSG00000008083	ENST00000341776	1				MTA1
JARID2	ENSG00000008083	ENST00000397311	2				MEIS2
JARID2	ENSG00000008083	ENST00000541660	3				ONECUT1
E2F3	ENSG00000112242	ENST00000346618	1				RFX7
E2F3	ENSG00000112242	ENST00000535432	1				FOXB1
POU5F1	ENSG00000204531	ENST00000259915	10				ARID3B
PBX2	ENSG00000204304	ENST00000375050	1				ISL2
SPDEF	ENSG00000124664	ENST00000374037	3				CRAMP1L
SPDEF	ENSG00000124664	ENST00000544425	4				IRX3
TEAD3	ENSG00000007866	ENST00000338863	5				IRX5
ETV7	ENSG00000010030	ENST00000538992	11				IRX6
ETV7	ENSG00000010030	ENST00000340181	10				HSF4
ETV7	ENSG00000010030	ENST00000339796	3				E2F4
FOXP4	ENSG00000137166	ENST00000373060	2				ZFHX3
FOXP4	ENSG00000137166	ENST00000373057	3				IRF8
FOXP4	ENSG00000137166	ENST00000307972	6				FOXF1
TRERF1	ENSG00000124496	ENST00000372922	1				FOXC2
TRERF1	ENSG00000124496	ENST00000541110	1				FOXL1
CDC5L	ENSG00000096401	ENST00000371477	1				NCOR1
POU3F2	ENSG00000184486	ENST00000328345	2				VTN
FOXO3	ENSG00000118689	ENST00000343882	4				FOXN1
FOXO3	ENSG00000118689	ENST00000406360	1				ETV4
FOXO3	ENSG00000118689	ENST00000540898	2				MEOX1
RFX6	ENSG00000185002	ENST00000332958	7				HOXB1
HSF2	ENSG00000025156	ENST00000368455	4				HOXB2
HSF2	ENSG00000025156	ENST00000452194	4				HOXB3
MYB	ENSG00000118513	ENST00000341911	2				HOXB4
MYB	ENSG00000118513	ENST00000367814	2				HOXB5
ARID1B	ENSG00000049618	ENST00000350026	2				HOXB6
ARID1B	ENSG00000049618	ENST00000367148	2				HOXB7
ARID1B	ENSG00000049618	ENST00000275248	2				HOXB8
UNCX	ENSG00000164853	ENST00000316333	1				HOXB9
FOXK1	ENSG00000164916	ENST00000446823	8				HOXB13
FOXK1	ENSG00000164916	ENST00000328914	4				DLX4
ETV1	ENSG00000006468	ENST00000420159	3				DLX3
ETV1	ENSG00000006468	ENST00000433547	4				HSF5
ETV1	ENSG00000006468	ENST00000430479	8				FOXJ1
ETV1	ENSG00000006468	ENST00000405218	8				FOXK2
ETV1	ENSG00000006468	ENST00000343495	10				TGIF1
ETV1	ENSG00000006468	ENST00000403685	2				ONECUT2
ETV1	ENSG00000006468	ENST00000431887	1				RAX
ETV1	ENSG00000006468	ENST00000242066	1				TSHZ1
MEOX2	ENSG00000106511	ENST00000262041	4				ADNP2
HOXA1	ENSG00000105991	ENST00000343060	0				MIER2
HOXA1	ENSG00000105991	ENST00000355633	0				ARID3A
HOXA2	ENSG00000105996	ENST00000222718	1				ONECUT3
HOXA3	ENSG00000105997	ENST00000522456	3				RAX2
HOXA3	ENSG00000105997	ENST00000396352	2				RFX2
HOXA3	ENSG00000105997	ENST00000317201	6				RFX1
HOXA4	ENSG00000197576	ENST00000428284	2				PBX4
HOXA4	ENSG00000197576	ENST00000360046	2				TSHZ3
HOXA3	ENSG00000105997	ENST00000522788	2				ETV2
HOXA3	ENSG00000105997	ENST00000521779	2				POU2F2
HOXA5	ENSG00000106004	ENST00000222726	3				ERF
HOXA6	ENSG00000106006	ENST00000222728	2				SIX5
HOXA7	ENSG00000122592	ENST00000242159	4				FOXA3
HOXA7	ENSG00000122592	ENST00000519842	5				MEIS3
HOXA9	ENSG00000078399	ENST00000343483	5				ZNF541
HOXA10	ENSG00000253293	ENST00000283921	2				TPRX1
HOXA10	ENSG00000253293	ENST00000396344	2				CRX
HOXA11	ENSG00000005073	ENST00000006015	1				TEAD2
HOXA13	ENSG00000106031	ENST00000222753	1				IRF3
EVX1	ENSG00000106038	ENST00000496902	3				DPRX
EVX1	ENSG00000106038	ENST00000535619	4				DUXA
POU6F2	ENSG00000106536	ENST00000403058	1				NKX2-4
POU6F2	ENSG00000106536	ENST00000518318	1				NKX2-2
PHTF2	ENSG00000006576	ENST00000422959	0				PAX1
PHTF2	ENSG00000006576	ENST00000275575	0				FOXA2
PHTF2	ENSG00000006576	ENST00000416283	5				VSX1
PHTF2	ENSG00000006576	ENST00000248550	5				FOXS1
DMTF1	ENSG00000135164	ENST00000394702	3				E2F1
DMTF1	ENSG00000135164	ENST00000446796	3				TGIF2
DMTF1	ENSG00000135164	ENST00000420131	3				ZHX3
DMTF1	ENSG00000135164	ENST00000414630	3				MYBL2
DMTF1	ENSG00000135164	ENST00000453049	3				ADNP
DMTF1	ENSG00000135164	ENST00000428819	3				TSHZ2
DMTF1	ENSG00000135164	ENST00000432937	2				GABPA
DMTF1	ENSG00000135164	ENST00000432366	2				ERG
DMTF1	ENSG00000135164	ENST00000423590	2				ETS2
DMTF1	ENSG00000135164	ENST00000394703	2				PKNOX1
DMTF1	ENSG00000135164	ENST00000579592	2				GSC2
DMTF1	ENSG00000135164	ENST00000434534	2				ISX
DMTF1	ENSG00000135164	ENST00000582925	4				SHOX
DMTF1	ENSG00000135164	ENST00000414194	4				ARX
DMTF1	ENSG00000135164	ENST00000425705	6				ELK1
DLX6	ENSG00000006377	ENST00000518156	3				FOXP3
DLX6	ENSG00000006377	ENST00000007660	1				KDM5C
DLX5	ENSG00000105880	ENST00000222598	4				FOXR2
CUX1	ENSG00000257923	ENST00000437600	3				FOXO4
CUX1	ENSG00000257923	ENST00000292538	3				CDX4
CUX1	ENSG00000257923	ENST00000393824	3				POU3F4
CUX1	ENSG00000257923	ENST00000547394	3				HDX
CUX1	ENSG00000257923	ENST00000360264	3				TGIF2LX
CUX1	ENSG00000257923	ENST00000292535	3				ESX1
CUX1	ENSG00000257923	ENST00000550008	3				RHOXF2B
DNAJC2	ENSG00000105821	ENST00000249270	2				RHOXF1
DNAJC2	ENSG00000105821	ENST00000379263	1				RHOXF2
FOXP2	ENSG00000128573	ENST00000393500	1				SMARCA1
FOXP2	ENSG00000128573	ENST00000393494	0				ELF4
FOXP2	ENSG00000128573	ENST00000403559	2				HSFX1
FOXP2	ENSG00000128573	ENST00000350908	2				TGIF2LY
FOXP2	ENSG00000128573	ENST00000393489	2				HSFY1
FOXP2	ENSG00000128573	ENST00000360232	0				KDM5D
FOXP2	ENSG00000128573	ENST00000393491	0
PAX4	ENSG00000106331	ENST00000341640	3
PAX4	ENSG00000106331	ENST00000338516	3
IRF5	ENSG00000128604	ENST00000489702	7
IRF5	ENSG00000128604	ENST00000357234	3
IRF5	ENSG00000128604	ENST00000479582	4
IRF5	ENSG00000128604	ENST00000464557	4
IRF5	ENSG00000128604	ENST00000402030	5
IRF5	ENSG00000128604	ENST00000249375	8
IRF5	ENSG00000128604	ENST00000467002	5
IRF5	ENSG00000128604	ENST00000473745	3
NOBOX	ENSG00000106410	ENST00000223140	2
NOBOX	ENSG00000106410	ENST00000467773	4
GBX1	ENSG00000164900	ENST00000297537	4
EN2	ENSG00000164778	ENST00000297375	2
MNX1	ENSG00000130675	ENST00000543409	3
MNX1	ENSG00000130675	ENST00000252971	4
NKX3-1	ENSG00000167034	ENST00000523261	6
NKX3-1	ENSG00000167034	ENST00000380871	6
NKX2-6	ENSG00000180053	ENST00000418222	3
NKX2-6	ENSG00000180053	ENST00000325017	3
HMBOX1	ENSG00000147421	ENST00000403668	0
HMBOX1	ENSG00000147421	ENST00000519662	0
HMBOX1	ENSG00000147421	ENST00000397358	0
HMBOX1	ENSG00000147421	ENST00000524238	0
NKX6-3	ENSG00000165066	ENST00000524115	4
NKX6-3	ENSG00000165066	ENST00000518699	6
MYBL1	ENSG00000185697	ENST00000524176	2
MYBL1	ENSG00000185697	ENST00000522677	3
ZFHX4	ENSG00000091656	ENST00000521891	5
ZFHX4	ENSG00000091656	ENST00000050961	5
ZFHX4	ENSG00000091656	ENST00000520307	4
ZFHX4	ENSG00000091656	ENST00000523885	4
ZFHX4	ENSG00000091656	ENST00000517585	1
ZFHX4	ENSG00000091656	ENST00000523809	2
ZFHX4	ENSG00000091656	ENST00000518282	0
E2F5	ENSG00000133740	ENST00000418930	2
E2F5	ENSG00000133740	ENST00000256117	4
E2F5	ENSG00000133740	ENST00000416274	4
E2F5	ENSG00000133740	ENST00000517476	5
E2F5	ENSG00000133740	ENST00000518234	2
ZHX2	ENSG00000178764	ENST00000314393	2
ZHX2	ENSG00000178764	ENST00000534247	3
ZHX1	ENSG00000165156	ENST00000602651	1
ZHX1	ENSG00000165156	ENST00000297857	1
ZHX1	ENSG00000165156	ENST00000395571	2
ZHX1	ENSG00000165156	ENST00000522655	0
POU5F1B	ENSG00000212993	ENST00000465342	4
POU5F1B	ENSG00000212993	ENST00000391675	5
HSF1	ENSG00000185122	ENST00000528838	0
FOXH1	ENSG00000160973	ENST00000377317	5
FOXD4	ENSG00000170122	ENST00000382500	9
RFX3	ENSG00000080298	ENST00000449234	3
RFX3	ENSG00000080298	ENST00000458034	3
RFX3	ENSG00000080298	ENST00000442560	5
RFX3	ENSG00000080298	ENST00000381984	4
RFX3	ENSG00000080298	ENST00000358730	4
RFX3	ENSG00000080298	ENST00000457373	2
RFX3	ENSG00000080298	ENST00000451859	2
RFX3	ENSG00000080298	ENST00000382004	5
RFX3	ENSG00000080298	ENST00000449190	5
ARID3C	ENSG00000205143	ENST00000378909	2
PAX5	ENSG00000196092	ENST00000358127	3
FOXD4L5	ENSG00000204779	ENST00000377420	1
FOXD4L4	ENSG00000184659	ENST00000377413	0
FOXD4L3	ENSG00000187559	ENST00000342833	0
FOXB2	ENSG00000204612	ENST00000376708	2
BARX1	ENSG00000131668	ENST00000401724	3
BARX1	ENSG00000131668	ENST00000253968	0
FOXE1	ENSG00000178919	ENST00000375123	6
LHX6	ENSG00000106852	ENST00000559895	2
LHX6	ENSG00000106852	ENST00000373755	0
LHX6	ENSG00000106852	ENST00000541397	3
LHX6	ENSG00000106852	ENST00000560485	3
LHX6	ENSG00000106852	ENST00000394319	1
LHX6	ENSG00000106852	ENST00000340587	1
LHX2	ENSG00000106689	ENST00000373615	2
PBX3	ENSG00000167081	ENST00000342287	3
PBX3	ENSG00000167081	ENST00000373489	2
PBX3	ENSG00000167081	ENST00000373483	2
PBX3	ENSG00000167081	ENST00000491787	4
PBX3	ENSG00000167081	ENST00000447726	4
LMX1B	ENSG00000136944	ENST00000526117	1
LMX1B	ENSG00000136944	ENST00000561065	1
PRRX2	ENSG00000167157	ENST00000372469	3
BARHL1	ENSG00000125492	ENST00000263610	7
BARHL1	ENSG00000125492	ENST00000542090	3
LHX3	ENSG00000107187	ENST00000371746	5
LHX3	ENSG00000107187	ENST00000371748	9
SNAPC4	ENSG00000165684	ENST00000298532	3
DNAJC1	ENSG00000136770	ENST00000447548	2
DNAJC1	ENSG00000136770	ENST00000376980	0
DNAJC1	ENSG00000136770	ENST00000376946	0
MKX	ENSG00000150051	ENST00000561227	2
MKX	ENSG00000150051	ENST00000419761	1
MKX	ENSG00000150051	ENST00000375790	1
ZEB1	ENSG00000148516	ENST00000320985	0
ZEB1	ENSG00000148516	ENST00000361642	0
ZEB1	ENSG00000148516	ENST00000560721	0
ZEB1	ENSG00000148516	ENST00000424869	0
ZEB1	ENSG00000148516	ENST00000542815	0
ZEB1	ENSG00000148516	ENST00000446923	2
ZEB1	ENSG00000148516	ENST00000559476	2
DRGX	ENSG00000165606	ENST00000434016	1
DRGX	ENSG00000165606	ENST00000374139	1
ARID5B	ENSG00000150347	ENST00000279873	2
ARID5B	ENSG00000150347	ENST00000309334	5
HHEX	ENSG00000152804	ENST00000282728	3
NKX2-3	ENSG00000119919	ENST00000344586	8
PAX2	ENSG00000075891	ENST00000361791	4
TLX1	ENSG00000107807	ENST00000370196	3
TLX1	ENSG00000107807	ENST00000467928	1
LBX1	ENSG00000138136	ENST00000370193	1
VAX1	ENSG00000148704	ENST00000369206	7
VAX1	ENSG00000148704	ENST00000277905	4
EMX2	ENSG00000170370	ENST00000553456	4
EMX2	ENSG00000170370	ENST00000442245	3
HMX3	ENSG00000188620	ENST00000357878	1
HMX2	ENSG00000188816	ENST00000339992	5
NKX1-2	ENSG00000229544	ENST00000440536	9
FOXI2	ENSG00000186766	ENST00000388920	4
NKX6-2	ENSG00000148826	ENST00000368592	2
VENTX	ENSG00000151650	ENST00000325980	2
IRF7	ENSG00000185507	ENST00000348655	3
IRF7	ENSG00000185507	ENST00000397566	3
IRF7	ENSG00000185507	ENST00000397562	2
IRF7	ENSG00000185507	ENST00000330243	2
IRF7	ENSG00000185507	ENST00000397570	2
TEAD1	ENSG00000187079	ENST00000361905	2
TEAD1	ENSG00000187079	ENST00000527636	2
TEAD1	ENSG00000187079	ENST00000527376	2
TEAD1	ENSG00000187079	ENST00000334310	2
TEAD1	ENSG00000187079	ENST00000361985	0
E2F8	ENSG00000129173	ENST00000250024	1
E2F8	ENSG00000129173	ENST00000527884	2
DBX1	ENSG00000109851	ENST00000227256	6
DBX1	ENSG00000109851	ENST00000524983	2
PAX6	ENSG00000007372	ENST00000379107	1
PAX6	ENSG00000007372	ENST00000379109	1
PAX6	ENSG00000007372	ENST00000379111	0
PAX6	ENSG00000007372	ENST00000438681	0
PAX6	ENSG00000007372	ENST00000241001	0
PAX6	ENSG00000007372	ENST00000379115	0
PAX6	ENSG00000007372	ENST00000379123	1
PAX6	ENSG00000007372	ENST00000524853	1
PAX6	ENSG00000007372	ENST00000525535	2
PAX6	ENSG00000007372	ENST00000423822	2
PAX6	ENSG00000007372	ENST00000419022	3
ELF5	ENSG00000135374	ENST00000312319	3
ELF5	ENSG00000135374	ENST00000257832	4
EHF	ENSG00000135373	ENST00000257831	3
EHF	ENSG00000135373	ENST00000530286	3
ALX4	ENSG00000052850	ENST00000329255	1
SPI1	ENSG00000066336	ENST00000227163	1
SPI1	ENSG00000066336	ENST00000378538	2
MTA2	ENSG00000149480	ENST00000278823	4
RCOR2	ENSG00000167771	ENST00000301459	2
PHOX2A	ENSG00000165462	ENST00000298231	2
FOXR1	ENSG00000176302	ENST00000317011	7
POU2F3	ENSG00000137709	ENST00000260264	2
POU2F3	ENSG00000137709	ENST00000543440	3
BSX	ENSG00000188909	ENST00000343035	1
PKNOX2	ENSG00000165495	ENST00000298282	1
PKNOX2	ENSG00000165495	ENST00000527238	1
PKNOX2	ENSG00000165495	ENST00000542175	0
PKNOX2	ENSG00000165495	ENST00000531212	3
PKNOX2	ENSG00000165495	ENST00000558705	12
ETS1	ENSG00000134954	ENST00000526145	2
ETS1	ENSG00000134954	ENST00000319397	2
ETS1	ENSG00000134954	ENST00000345075	2
ETS1	ENSG00000134954	ENST00000392668	2
FLI1	ENSG00000151702	ENST00000525560	2
FLI1	ENSG00000151702	ENST00000344954	2
FLI1	ENSG00000151702	ENST00000527767	1
FLI1	ENSG00000151702	ENST00000527786	6
FLI1	ENSG00000151702	ENST00000534087	5
FLI1	ENSG00000151702	ENST00000281428	4
BARX2	ENSG00000043039	ENST00000281437	1
KDM5A	ENSG00000073614	ENST00000399788	5
FOXM1	ENSG00000111206	ENST00000359843	6
FOXM1	ENSG00000111206	ENST00000342628	5
FOXM1	ENSG00000111206	ENST00000361953	5
TEAD4	ENSG00000197905	ENST00000358409	4
TEAD4	ENSG00000197905	ENST00000540314	3
TEAD4	ENSG00000197905	ENST00000536826	3
TEAD4	ENSG00000197905	ENST00000359864	3
TEAD4	ENSG00000197905	ENST00000543035	3
TEAD4	ENSG00000197905	ENST00000397122	4
NANOGNB	ENSG00000205857	ENST00000382119	1
NANOG	ENSG00000111704	ENST00000229307	5
NANOG	ENSG00000111704	ENST00000526286	3
FOXJ2	ENSG00000065970	ENST00000162391	1
FOXJ2	ENSG00000065970	ENST00000428177	2
ETV6	ENSG00000139083	ENST00000396373	1
DBX2	ENSG00000185610	ENST00000332700	3
ARID2	ENSG00000189079	ENST00000334344	1
POU6F1	ENSG00000184271	ENST00000550824	2
POU6F1	ENSG00000184271	ENST00000547855	0
POU6F1	ENSG00000184271	ENST00000333640	0
POU6F1	ENSG00000184271	ENST00000389243	5
HOXC13	ENSG00000123364	ENST00000243056	6
HOXC12	ENSG00000123407	ENST00000243103	8
HOXC11	ENSG00000123388	ENST00000546378	0
HOXC10	ENSG00000180818	ENST00000303460	4
HOXC6	ENSG00000197757	ENST00000504315	5
HOXC6	ENSG00000197757	ENST00000509328	6
HOXC9	ENSG00000180806	ENST00000508190	3
HOXC9	ENSG00000180806	ENST00000303450	3
HOXC8	ENSG00000037965	ENST00000040584	2
HOXC6	ENSG00000197757	ENST00000394331	1
HOXC6	ENSG00000197757	ENST00000243108	6
HOXC5	ENSG00000172789	ENST00000312492	2
HOXC4	ENSG00000198353	ENST00000609810	0
SMARCC2	ENSG00000139613	ENST00000347471	3
SMARCC2	ENSG00000139613	ENST00000394023	3
E2F7	ENSG00000165891	ENST00000547316	3
E2F7	ENSG00000165891	ENST00000416496	3
E2F7	ENSG00000165891	ENST00000322886	3
ALX1	ENSG00000180318	ENST00000316824	2
ELK3	ENSG00000111145	ENST00000228741	1
ELK3	ENSG00000111145	ENST00000547249	1
ELK3	ENSG00000111145	ENST00000547860	3
SPIC	ENSG00000166211	ENST00000551346	5
SPIC	ENSG00000166211	ENST00000299272	3
RFX4	ENSG00000111783	ENST00000392842	2
RFX4	ENSG00000111783	ENST00000357881	4
RFX4	ENSG00000111783	ENST00000229387	3
FOXN4	ENSG00000139445	ENST00000355216	1
CUX2	ENSG00000111249	ENST00000261726	0
LHX5	ENSG00000089116	ENST00000261731	5
HNF1A	ENSG00000135100	ENST00000257555	1
HNF1A	ENSG00000135100	ENST00000400024	1
HNF1A	ENSG00000135100	ENST00000543427	1
NCOR2	ENSG00000196498	ENST00000405201	5
NCOR2	ENSG00000196498	ENST00000404621	4
GSX1	ENSG00000169840	ENST00000302945	2
PDX1	ENSG00000139515	ENST00000381033	5
CDX2	ENSG00000165556	ENST00000381020	2
FOXO1	ENSG00000150907	ENST00000379561	2
ELF1	ENSG00000120690	ENST00000442101	3
ELF1	ENSG00000120690	ENST00000239882	3
ELF1	ENSG00000120690	ENST00000405737	2
POU4F1	ENSG00000152192	ENST00000377208	5
TFDP1	ENSG00000198176	ENST00000538138	2
TFDP1	ENSG00000198176	ENST00000375370	2
TFDP1	ENSG00000198176	ENST00000544902	1
TFDP1	ENSG00000198176	ENST00000408980	1
TFDP1	ENSG00000198176	ENST00000453989	2
HOMEZ	ENSG00000215271	ENST00000357460	3
HOMEZ	ENSG00000215271	ENST00000431326	0
ZFHX2	ENSG00000136367	ENST00000555334	2
ZFHX2	ENSG00000136367	ENST00000419474	0
ZFHX2	ENSG00000136367	ENST00000412565	3
IRF9	ENSG00000213928	ENST00000396864	4
FOXG1	ENSG00000176165	ENST00000382535	2
FOXG1	ENSG00000176165	ENST00000313071	4
NKX2-1	ENSG00000136352	ENST00000498187	2
NKX2-1	ENSG00000136352	ENST00000522719	7
NKX2-1	ENSG00000136352	ENST00000354822	7
NKX2-1	ENSG00000136352	ENST00000546983	1
NKX2-1	ENSG00000136352	ENST00000518149	2
NKX2-8	ENSG00000136327	ENST00000258829	4
PAX9	ENSG00000198807	ENST00000402703	6
PAX9	ENSG00000198807	ENST00000361487	4
FOXA1	ENSG00000129514	ENST00000250448	3
FOXA1	ENSG00000129514	ENST00000540786	4
OTX2	ENSG00000165588	ENST00000554845	0
OTX2	ENSG00000165588	ENST00000408990	0
OTX2	ENSG00000165588	ENST00000555006	1
OTX2	ENSG00000165588	ENST00000339475	1
OTX2	ENSG00000165588	ENST00000555804	1
ARID4A	ENSG00000032219	ENST00000355431	1
ARID4A	ENSG00000032219	ENST00000348476	0
ARID4A	ENSG00000032219	ENST00000395168	0
ARID4A	ENSG00000032219	ENST00000424658	3
ARID4A	ENSG00000032219	ENST00000431317	4
SIX6	ENSG00000184302	ENST00000327720	1
SIX1	ENSG00000126778	ENST00000247182	4
SIX4	ENSG00000100625	ENST00000216513	1
SIX4	ENSG00000100625	ENST00000556952	2
ELMSAN1	ENSG00000156030	ENST00000421708	3
ELMSAN1	ENSG00000156030	ENST00000286523	3
ELMSAN1	ENSG00000156030	ENST00000394071	5
VSX2	ENSG00000119614	ENST00000261980	4
PROX2	ENSG00000119608	ENST00000556084	3
FOXN3	ENSG00000053254	ENST00000261302	6
FOXN3	ENSG00000053254	ENST00000557258	4
FOXN3	ENSG00000053254	ENST00000555034	0
FOXN3	ENSG00000053254	ENST00000553904	1
FOXN3	ENSG00000053254	ENST00000345097	3
FOXN3	ENSG00000053254	ENST00000555855	3
FOXN3	ENSG00000053254	ENST00000555353	3
GSC	ENSG00000133937	ENST00000238558	3
RCOR1	ENSG00000089902	ENST00000262241	2
RCOR1	ENSG00000089902	ENST00000570597	2
MTA1	ENSG00000182979	ENST00000331320	2
MTA1	ENSG00000182979	ENST00000435036	3
MEIS2	ENSG00000134138	ENST00000559085	4
MEIS2	ENSG00000134138	ENST00000397624	4
MEIS2	ENSG00000134138	ENST00000557796	2
MEIS2	ENSG00000134138	ENST00000397620	2
MEIS2	ENSG00000134138	ENST00000219869	2
MEIS2	ENSG00000134138	ENST00000559561	2
MEIS2	ENSG00000134138	ENST00000561208	1
MEIS2	ENSG00000134138	ENST00000382766	1
MEIS2	ENSG00000134138	ENST00000424352	1
MEIS2	ENSG00000134138	ENST00000338564	5
MEIS2	ENSG00000134138	ENST00000558313	5
MEIS2	ENSG00000134138	ENST00000340545	5
ONECUT1	ENSG00000169856	ENST00000305901	8
RFX7	ENSG00000181827	ENST00000560792	2
RFX7	ENSG00000181827	ENST00000559447	2
RFX7	ENSG00000181827	ENST00000422057	2
FOXB1	ENSG00000171956	ENST00000396057	2
ARID3B	ENSG00000179361	ENST00000346246	2
ISL2	ENSG00000159556	ENST00000290759	5
CRAMP1L	ENSG00000007545	ENST00000397412	2
CRAMP1L	ENSG00000007545	ENST00000436138	2
CRAMP1L	ENSG00000007545	ENST00000262317	7
IRX3	ENSG00000177508	ENST00000329734	3
IRX5	ENSG00000176842	ENST00000394636	1
IRX5	ENSG00000176842	ENST00000320990	2
IRX6	ENSG00000159387	ENST00000290552	8
HSF4	ENSG00000102878	ENST00000264009	2
HSF4	ENSG00000102878	ENST00000517685	2
E2F4	ENSG00000205250	ENST00000379378	3
ZFHX3	ENSG00000140836	ENST00000268489	2
ZFHX3	ENSG00000140836	ENST00000397992	4
IRF8	ENSG00000140968	ENST00000268638	6
IRF8	ENSG00000140968	ENST00000565552	6
IRF8	ENSG00000140968	ENST00000564617	3
IRF8	ENSG00000140968	ENST00000564803	3
FOXF1	ENSG00000103241	ENST00000262426	7
FOXC2	ENSG00000176692	ENST00000320354	3
FOXL1	ENSG00000176678	ENST00000593625	6
FOXL1	ENSG00000176678	ENST00000320241	2
NCOR1	ENSG00000141027	ENST00000395857	1
NCOR1	ENSG00000141027	ENST00000395851	1
NCOR1	ENSG00000141027	ENST00000436828	6
NCOR1	ENSG00000141027	ENST00000268712	6
NCOR1	ENSG00000141027	ENST00000430577	0
VTN	ENSG00000109072	ENST00000431468	3
VTN	ENSG00000109072	ENST00000438614	2
VTN	ENSG00000109072	ENST00000536498	3
VTN	ENSG00000109072	ENST00000226218	1
VTN	ENSG00000109072	ENST00000542029	1
FOXN1	ENSG00000109101	ENST00000577936	3
FOXN1	ENSG00000109101	ENST00000579795	3
FOXN1	ENSG00000109101	ENST00000226247	2
ETV4	ENSG00000175832	ENST00000393664	2
ETV4	ENSG00000175832	ENST00000538265	3
ETV4	ENSG00000175832	ENST00000319349	2
ETV4	ENSG00000175832	ENST00000586764	4
MEOX1	ENSG00000005102	ENST00000329168	1
MEOX1	ENSG00000005102	ENST00000393661	0
MEOX1	ENSG00000005102	ENST00000318579	0
HOXB1	ENSG00000120094	ENST00000239174	0
HOXB2	ENSG00000173917	ENST00000330070	3
HOXB3	ENSG00000120093	ENST00000470495	0
HOXB3	ENSG00000120093	ENST00000311626	1
HOXB3	ENSG00000120093	ENST00000485909	3
HOXB4	ENSG00000182742	ENST00000332503	2
HOXB3	ENSG00000120093	ENST00000476342	3
HOXB3	ENSG00000120093	ENST00000498678	3
HOXB5	ENSG00000120075	ENST00000239151	3
HOXB6	ENSG00000108511	ENST00000225648	3
HOXB6	ENSG00000108511	ENST00000484302	3
HOXB7	ENSG00000260027	ENST00000239165	2
HOXB8	ENSG00000120068	ENST00000239144	4
HOXB8	ENSG00000120068	ENST00000468443	4
HOXB9	ENSG00000170689	ENST00000311177	4
HOXB13	ENSG00000159184	ENST00000290295	2
DLX4	ENSG00000108813	ENST00000240306	3
DLX4	ENSG00000108813	ENST00000411890	3
DLX3	ENSG00000064195	ENST00000434704	4
HSF5	ENSG00000176160	ENST00000323777	1
FOXJ1	ENSG00000129654	ENST00000322957	2
FOXK2	ENSG00000141568	ENST00000335255	5
TGIF1	ENSG00000177426	ENST00000552383	7
TGIF1	ENSG00000177426	ENST00000401449	6
TGIF1	ENSG00000177426	ENST00000550958	6
TGIF1	ENSG00000177426	ENST00000548489	0
TGIF1	ENSG00000177426	ENST00000549780	6
TGIF1	ENSG00000177426	ENST00000549253	5
TGIF1	ENSG00000177426	ENST00000343820	9
TGIF1	ENSG00000177426	ENST00000407501	9
TGIF1	ENSG00000177426	ENST00000405385	6
TGIF1	ENSG00000177426	ENST00000546979	6
TGIF1	ENSG00000177426	ENST00000551541	3
TGIF1	ENSG00000177426	ENST00000345133	4
TGIF1	ENSG00000177426	ENST00000330513	4
TGIF1	ENSG00000177426	ENST00000549546	4
TGIF1	ENSG00000177426	ENST00000549468	5
TGIF1	ENSG00000177426	ENST00000551333	3
TGIF1	ENSG00000177426	ENST00000472042	0
ONECUT2	ENSG00000119547	ENST00000491143	2
RAX	ENSG00000134438	ENST00000334889	3
RAX	ENSG00000134438	ENST00000555288	2
TSHZ1	ENSG00000179981	ENST00000322038	5
TSHZ1	ENSG00000179981	ENST00000580243	3
TSHZ1	ENSG00000179981	ENST00000560918	1
TSHZ1	ENSG00000179981	ENST00000560661	5
ADNP2	ENSG00000101544	ENST00000262198	1
ADNP2	ENSG00000101544	ENST00000559951	3
MIER2	ENSG00000105556	ENST00000264819	2
ARID3A	ENSG00000116017	ENST00000263620	8
ONECUT3	ENSG00000205922	ENST00000382349	2
RAX2	ENSG00000173976	ENST00000555978	3
RFX2	ENSG00000087903	ENST00000359161	4
RFX2	ENSG00000087903	ENST00000592281	3
RFX2	ENSG00000087903	ENST00000587181	6
RFX2	ENSG00000087903	ENST00000592546	6
RFX2	ENSG00000087903	ENST00000303657	6
RFX2	ENSG00000087903	ENST00000592883	11
RFX1	ENSG00000132005	ENST00000254325	5
PBX4	ENSG00000105717	ENST00000251203	0
TSHZ3	ENSG00000121297	ENST00000240587	1
ETV2	ENSG00000105672	ENST00000402764	2
POU2F2	ENSG00000028277	ENST00000526816	1
POU2F2	ENSG00000028277	ENST00000529067	1
POU2F2	ENSG00000028277	ENST00000529952	1
POU2F2	ENSG00000028277	ENST00000389341	1
ERF	ENSG00000105722	ENST00000222329	1
SIX5	ENSG00000177045	ENST00000317578	2
FOXA3	ENSG00000170608	ENST00000302177	6
MEIS3	ENSG00000105419	ENST00000559524	4
MEIS3	ENSG00000105419	ENST00000561293	2
MEIS3	ENSG00000105419	ENST00000441740	2
ZNF541	ENSG00000118156	ENST00000391901	0
TPRX1	ENSG00000178928	ENST00000543508	2
TPRX1	ENSG00000178928	ENST00000322175	3
TPRX1	ENSG00000178928	ENST00000535759	8
CRX	ENSG00000105392	ENST00000566686	8
CRX	ENSG00000105392	ENST00000221996	5
CRX	ENSG00000105392	ENST00000539067	5
TEAD2	ENSG00000074219	ENST00000311227	6
IRF3	ENSG00000126456	ENST00000377135	2
IRF3	ENSG00000126456	ENST00000309877	5
IRF3	ENSG00000126456	ENST00000596756	6
IRF3	ENSG00000126456	ENST00000599223	6
IRF3	ENSG00000126456	ENST00000598108	4
IRF3	ENSG00000126456	ENST00000600453	3
IRF3	ENSG00000126456	ENST00000597198	3
IRF3	ENSG00000126456	ENST00000601809	3
IRF3	ENSG00000126456	ENST00000377139	2
DPRX	ENSG00000204595	ENST00000376650	1
DUXA	ENSG00000258873	ENST00000554048	2
NKX2-4	ENSG00000125816	ENST00000351817	3
NKX2-2	ENSG00000125820	ENST00000377142	1
PAX1	ENSG00000125813	ENST00000398485	3
FOXA2	ENSG00000125798	ENST00000419308	1
FOXA2	ENSG00000125798	ENST00000377115	6
VSX1	ENSG00000100987	ENST00000429762	3
VSX1	ENSG00000100987	ENST00000424574	4
FOXS1	ENSG00000179772	ENST00000375978	4
E2F1	ENSG00000101412	ENST00000343380	6
TGIF2	ENSG00000118707	ENST00000373874	2
TGIF2	ENSG00000118707	ENST00000373872	3
TGIF2	ENSG00000118707	ENST00000558028	0
TGIF2	ENSG00000118707	ENST00000560025	0
ZHX3	ENSG00000174306	ENST00000419740	1
ZHX3	ENSG00000174306	ENST00000436099	1
ZHX3	ENSG00000174306	ENST00000309060	1
ZHX3	ENSG00000174306	ENST00000540170	1
ZHX3	ENSG00000174306	ENST00000560361	2
ZHX3	ENSG00000174306	ENST00000432768	1
ZHX3	ENSG00000174306	ENST00000558993	4
ZHX3	ENSG00000174306	ENST00000441102	3
ZHX3	ENSG00000174306	ENST00000559234	3
MYBL2	ENSG00000101057	ENST00000396863	8
MYBL2	ENSG00000101057	ENST00000217026	7
ADNP	ENSG00000101126	ENST00000371602	0
ADNP	ENSG00000101126	ENST00000349014	4
ADNP	ENSG00000101126	ENST00000534467	0
ADNP	ENSG00000101126	ENST00000396029	2
ADNP	ENSG00000101126	ENST00000396032	1
TSHZ2	ENSG00000182463	ENST00000371497	4
TSHZ2	ENSG00000182463	ENST00000603338	6
TSHZ2	ENSG00000182463	ENST00000329613	6
GABPA	ENSG00000154727	ENST00000354828	6
GABPA	ENSG00000154727	ENST00000400075	5
ERG	ENSG00000157554	ENST00000429727	1
ERG	ENSG00000157554	ENST00000453032	1
ERG	ENSG00000157554	ENST00000288319	1
ERG	ENSG00000157554	ENST00000398897	5
ERG	ENSG00000157554	ENST00000398911	5
ERG	ENSG00000157554	ENST00000398919	4
ERG	ENSG00000157554	ENST00000417133	2
ERG	ENSG00000157554	ENST00000442448	2
ETS2	ENSG00000157557	ENST00000360214	4
ETS2	ENSG00000157557	ENST00000360938	1
ETS2	ENSG00000157557	ENST00000432278	1
ETS2	ENSG00000157557	ENST00000456966	2
PKNOX1	ENSG00000160199	ENST00000291547	2
PKNOX1	ENSG00000160199	ENST00000432907	1
GSC2	ENSG00000063515	ENST00000086933	6
ISX	ENSG00000175329	ENST00000404699	5
SHOX	ENSG00000185960	ENST00000381578	2
SHOX	ENSG00000185960	ENST00000554971	0
ARX	ENSG00000004848	ENST00000379044	0
ELK1	ENSG00000126767	ENST00000247161	1
ELK1	ENSG00000126767	ENST00000376983	1
ELK1	ENSG00000126767	ENST00000343894	1
FOXP3	ENSG00000049768	ENST00000455775	0
FOXP3	ENSG00000049768	ENST00000518685	0
FOXP3	ENSG00000049768	ENST00000376207	0
KDM5C	ENSG00000126012	ENST00000404049	0
KDM5C	ENSG00000126012	ENST00000452825	0
FOXR2	ENSG00000189299	ENST00000339140	0
FOXO4	ENSG00000184481	ENST00000374259	0
FOXO4	ENSG00000184481	ENST00000341558	0
CDX4	ENSG00000131264	ENST00000373514	1
POU3F4	ENSG00000196767	ENST00000373200	0
HDX	ENSG00000165259	ENST00000373177	1
HDX	ENSG00000165259	ENST00000297977	1
HDX	ENSG00000165259	ENST00000449553	2
TGIF2LX	ENSG00000153779	ENST00000283891	0
TGIF2LX	ENSG00000153779	ENST00000561129	0
ESX1	ENSG00000123576	ENST00000372588	1
RHOXF2B	ENSG00000203989	ENST00000371402	0
RHOXF1	ENSG00000101883	ENST00000217999	1
RHOXF2	ENSG00000131721	ENST00000371388	0
SMARCA1	ENSG00000102038	ENST00000371121	0
SMARCA1	ENSG00000102038	ENST00000371123	0
ELF4	ENSG00000102034	ENST00000434609	1
ELF4	ENSG00000102034	ENST00000308167	1
ELF4	ENSG00000102034	ENST00000335997	1
HSFX1	ENSG00000171116	ENST00000370416	0
TGIF2LY	ENSG00000176679	ENST00000321217	0
TGIF2LY	ENSG00000176679	ENST00000559055	0
HSFY1	ENSG00000172468	ENST00000307393	0
HSFY1	ENSG00000172468	ENST00000309834	0
HSFY1	ENSG00000172468	ENST00000382856	0
KDM5D	ENSG00000012817	ENST00000415360	0
KDM5D	ENSG00000012817	ENST00000447300	1
KDM5D	ENSG00000012817	ENST00000382806	1
KDM5D	ENSG00000012817	ENST00000317961	0
KDM5D	ENSG00000012817	ENST00000541639	0

## Sheet: ZNF
HGNC Gene Name	Ensembl Gene ID	Ensembl Transcript ID	SNP count				unique HGNC Gene Name only		Genes	750	Transcripts	2074
PRDM16	ENSG00000142611	ENST00000378398	4				PRDM16
PRDM16	ENSG00000142611	ENST00000270722	4				ZBTB48
PRDM16	ENSG00000142611	ENST00000509860	6				THAP3
ZBTB48	ENSG00000204859	ENST00000319084	6				RERE
ZBTB48	ENSG00000204859	ENST00000435905	6				CASZ1
ZBTB48	ENSG00000204859	ENST00000377674	6				PRDM2
THAP3	ENSG00000041988	ENST00000054650	1				ZBTB17
THAP3	ENSG00000041988	ENST00000307896	2				ZBTB40
THAP3	ENSG00000041988	ENST00000377627	2				ZNF436
RERE	ENSG00000142599	ENST00000476556	3				ZNF683
RERE	ENSG00000142599	ENST00000488215	1				NR0B2
RERE	ENSG00000142599	ENST00000468247	0				ZNF362
RERE	ENSG00000142599	ENST00000337907	5				ZSCAN20
RERE	ENSG00000142599	ENST00000400908	4				MTF1
CASZ1	ENSG00000130940	ENST00000377022	4				RLF
CASZ1	ENSG00000130940	ENST00000344008	5				ZFP69B
PRDM2	ENSG00000116731	ENST00000376048	0				ZFP69
PRDM2	ENSG00000116731	ENST00000311066	1				ZNF684
PRDM2	ENSG00000116731	ENST00000413440	1				HIVEP3
PRDM2	ENSG00000116731	ENST00000343137	1				ZNF691
PRDM2	ENSG00000116731	ENST00000407521	1				KLF17
PRDM2	ENSG00000116731	ENST00000487453	2				DMRTA2
ZBTB17	ENSG00000116809	ENST00000440560	1				DMRTB1
ZBTB17	ENSG00000116809	ENST00000444358	5				GLIS1
ZBTB17	ENSG00000116809	ENST00000537142	2				ZNF644
ZBTB17	ENSG00000116809	ENST00000448462	2				GFI1
ZBTB17	ENSG00000116809	ENST00000375743	2				ZNF697
ZBTB17	ENSG00000116809	ENST00000375733	2				ZNF687
ZBTB40	ENSG00000184677	ENST00000404138	1				POGZ
ZBTB40	ENSG00000184677	ENST00000400239	2				RORC
ZBTB40	ENSG00000184677	ENST00000374651	2				GATAD2B
ZNF436	ENSG00000125945	ENST00000374608	1				ZBTB7B
ZNF436	ENSG00000125945	ENST00000314011	1				NR1I3
ZNF683	ENSG00000176083	ENST00000451801	4				RXRG
ZNF683	ENSG00000176083	ENST00000403843	2				ZBTB37
ZNF683	ENSG00000176083	ENST00000436292	2				ZBTB41
ZNF683	ENSG00000176083	ENST00000416125	5				NR5A2
NR0B2	ENSG00000131910	ENST00000254227	2				ZNF281
ZNF362	ENSG00000160094	ENST00000539719	0				ZBED6
ZNF362	ENSG00000160094	ENST00000373428	1				ESRRG
ZSCAN20	ENSG00000121903	ENST00000361328	1				ZNF678
ZSCAN20	ENSG00000121903	ENST00000373413	1				ZBTB18
MTF1	ENSG00000188786	ENST00000373036	1				ZNF695
RLF	ENSG00000117000	ENST00000372771	1				ZNF669
ZFP69B	ENSG00000187801	ENST00000361584	6				ZNF124
ZFP69	ENSG00000187815	ENST00000372706	8				ZNF496
ZFP69	ENSG00000187815	ENST00000372705	4				ZNF672
ZNF684	ENSG00000117010	ENST00000372699	4				ZNF692
ZNF684	ENSG00000117010	ENST00000372697	5				MYT1L
HIVEP3	ENSG00000127124	ENST00000247584	3				KLF11
HIVEP3	ENSG00000127124	ENST00000372583	0				OSR1
HIVEP3	ENSG00000127124	ENST00000372584	3				DNMT3A
ZNF691	ENSG00000164011	ENST00000372508	2				ZNF513
ZNF691	ENSG00000164011	ENST00000372507	2				ZNF512
ZNF691	ENSG00000164011	ENST00000372506	2				MTA3
ZNF691	ENSG00000164011	ENST00000397044	2				BCL11A
ZNF691	ENSG00000164011	ENST00000372504	2				EGR4
ZNF691	ENSG00000164011	ENST00000397034	0				ZNF514
ZNF691	ENSG00000164011	ENST00000372503	0				ZC3H8
ZNF691	ENSG00000164011	ENST00000372502	3				ZC3H6
KLF17	ENSG00000171872	ENST00000372299	2				GLI2
DMRTA2	ENSG00000142700	ENST00000418121	0				NR4A2
DMRTA2	ENSG00000142700	ENST00000404795	2				SP5
DMRTB1	ENSG00000143006	ENST00000371445	1				SP3
GLIS1	ENSG00000174332	ENST00000312233	1				KLF7
ZNF644	ENSG00000122482	ENST00000347275	2				IKZF2
ZNF644	ENSG00000122482	ENST00000370440	2				ZNF142
ZNF644	ENSG00000122482	ENST00000337393	0				THAP4
GFI1	ENSG00000162676	ENST00000370332	0				PPARG
GFI1	ENSG00000162676	ENST00000427103	2				NR2C2
GFI1	ENSG00000162676	ENST00000294702	2				NR1D2
ZNF697	ENSG00000143067	ENST00000421812	2				THRB
ZNF687	ENSG00000143373	ENST00000336715	0				RARB
ZNF687	ENSG00000143373	ENST00000324048	0				ZNF860
ZNF687	ENSG00000143373	ENST00000368879	0				ZNF619
ZNF687	ENSG00000143373	ENST00000426871	1				ZNF620
POGZ	ENSG00000143442	ENST00000392723	3				ZNF621
POGZ	ENSG00000143442	ENST00000439756	2				ZBTB47
POGZ	ENSG00000143442	ENST00000533461	1				ZNF662
POGZ	ENSG00000143442	ENST00000450842	1				ZNF445
POGZ	ENSG00000143442	ENST00000368863	2				ZKSCAN7
POGZ	ENSG00000143442	ENST00000540984	2				ZNF660
POGZ	ENSG00000143442	ENST00000361398	1				ZNF197
POGZ	ENSG00000143442	ENST00000271715	1				ZNF35
RORC	ENSG00000143365	ENST00000356728	1				ZNF502
RORC	ENSG00000143365	ENST00000392697	0				ZNF501
RORC	ENSG00000143365	ENST00000318247	1				ZNF589
GATAD2B	ENSG00000143614	ENST00000368655	4				FEZF2
ZBTB7B	ENSG00000160685	ENST00000535420	3				ZNF717
ZBTB7B	ENSG00000160685	ENST00000368426	3				ZNF654
ZBTB7B	ENSG00000160685	ENST00000417934	2				ZBTB11
NR1I3	ENSG00000143257	ENST00000367979	5				ZBED2
NR1I3	ENSG00000143257	ENST00000512372	2				ZNF80
NR1I3	ENSG00000143257	ENST00000367984	2				ZBTB20
NR1I3	ENSG00000143257	ENST00000367982	2				NR1I2
NR1I3	ENSG00000143257	ENST00000367980	2				ZNF148
NR1I3	ENSG00000143257	ENST00000367983	3				KLF15
RXRG	ENSG00000143171	ENST00000359842	4				ZXDC
ZBTB37	ENSG00000185278	ENST00000367704	4				GATA2
ZBTB37	ENSG00000185278	ENST00000432989	4				ZBTB38
ZBTB37	ENSG00000185278	ENST00000367701	2				ZIC4
ZBTB41	ENSG00000177888	ENST00000367405	4				ZIC1
NR5A2	ENSG00000116833	ENST00000367362	3				MECOM
NR5A2	ENSG00000116833	ENST00000236914	3				MYNN
NR5A2	ENSG00000116833	ENST00000447034	3				ZNF639
NR5A2	ENSG00000116833	ENST00000544748	2				BCL6
NR5A2	ENSG00000116833	ENST00000367357	0				ZNF732
ZNF281	ENSG00000162702	ENST00000367352	1				ZNF141
ZNF281	ENSG00000162702	ENST00000367353	2				ZNF721
ZNF281	ENSG00000162702	ENST00000294740	2				LYAR
ZBED6	ENSG00000257315	ENST00000550078	1				ZBTB49
ESRRG	ENSG00000196482	ENST00000475275	1				ZNF518B
ESRRG	ENSG00000196482	ENST00000469486	1				KLF3
ESRRG	ENSG00000196482	ENST00000481543	1				REST
ESRRG	ENSG00000196482	ENST00000459955	1				THAP6
ESRRG	ENSG00000196482	ENST00000408911	1				PRDM8
ESRRG	ENSG00000196482	ENST00000360012	7				THAP9
ESRRG	ENSG00000196482	ENST00000487276	5				PRDM5
ESRRG	ENSG00000196482	ENST00000361395	5				ZNF827
ESRRG	ENSG00000196482	ENST00000493748	6				NR3C2
ESRRG	ENSG00000196482	ENST00000359162	2				ZFP42
ESRRG	ENSG00000196482	ENST00000361525	3				PRDM9
ESRRG	ENSG00000196482	ENST00000493603	6				ZNF131
ESRRG	ENSG00000196482	ENST00000366940	6				ZNF366
ZNF678	ENSG00000181450	ENST00000397097	2				ZBED3
ZBTB18	ENSG00000179456	ENST00000358704	2				NR2F1
ZNF695	ENSG00000197472	ENST00000339986	5				PRDM6
ZNF695	ENSG00000197472	ENST00000487338	6				EGR1
ZNF669	ENSG00000188295	ENST00000448299	2				NR3C1
ZNF669	ENSG00000188295	ENST00000358785	2				ZNF300
ZNF124	ENSG00000196418	ENST00000543802	4				ZNF354A
ZNF124	ENSG00000196418	ENST00000472531	4				ZNF354B
ZNF124	ENSG00000196418	ENST00000340684	4				ZFP2
ZNF496	ENSG00000162714	ENST00000294753	2				ZNF454
ZNF672	ENSG00000171161	ENST00000306562	3				ZNF879
ZNF672	ENSG00000171161	ENST00000505503	3				ZNF354C
ZNF672	ENSG00000171161	ENST00000428515	3				ZFP62
ZNF672	ENSG00000171161	ENST00000423362	3				RREB1
ZNF692	ENSG00000171163	ENST00000451251	4				HIVEP1
ZNF692	ENSG00000171163	ENST00000496231	2				ZNF322
ZNF692	ENSG00000171163	ENST00000306601	2				ZNF391
ZNF692	ENSG00000171163	ENST00000366471	2				ZNF184
MYT1L	ENSG00000186487	ENST00000407844	7				ZNF165
MYT1L	ENSG00000186487	ENST00000428368	5				ZSCAN16
MYT1L	ENSG00000186487	ENST00000399161	5				ZKSCAN8
KLF11	ENSG00000172059	ENST00000305883	4				ZSCAN9
KLF11	ENSG00000172059	ENST00000540845	3				ZKSCAN4
KLF11	ENSG00000172059	ENST00000535335	9				ZSCAN31
OSR1	ENSG00000143867	ENST00000536433	2				ZKSCAN3
OSR1	ENSG00000143867	ENST00000272223	3				ZSCAN12
DNMT3A	ENSG00000119772	ENST00000380746	0				ZSCAN23
DNMT3A	ENSG00000119772	ENST00000321117	1				ZNF311
DNMT3A	ENSG00000119772	ENST00000264709	1				ZFP57
ZNF513	ENSG00000163795	ENST00000323703	2				ZBTB12
ZNF512	ENSG00000243943	ENST00000355467	0				RXRB
ZNF512	ENSG00000243943	ENST00000556601	0				ZBTB22
ZNF512	ENSG00000243943	ENST00000416005	0				ZNF76
ZNF512	ENSG00000243943	ENST00000413371	0				PPARD
MTA3	ENSG00000057935	ENST00000407270	3				TRERF1
MTA3	ENSG00000057935	ENST00000405094	4				ZNF451
BCL11A	ENSG00000119866	ENST00000538214	0				ZNF292
BCL11A	ENSG00000119866	ENST00000358510	0				PRDM13
BCL11A	ENSG00000119866	ENST00000537768	0				PRDM1
BCL11A	ENSG00000119866	ENST00000335712	0				NR2E1
BCL11A	ENSG00000119866	ENST00000356842	0				ZBTB24
BCL11A	ENSG00000119866	ENST00000359629	2				HIVEP2
EGR4	ENSG00000135625	ENST00000545030	2				PLAGL1
EGR4	ENSG00000135625	ENST00000436467	2				ZBTB2
ZNF514	ENSG00000144026	ENST00000411425	1				ESR1
ZNF514	ENSG00000144026	ENST00000295208	1				RBAK
ZC3H8	ENSG00000144161	ENST00000272570	3				ZNF853
ZC3H8	ENSG00000144161	ENST00000409573	3				SP8
ZC3H6	ENSG00000188177	ENST00000409871	0				SP4
ZC3H6	ENSG00000188177	ENST00000343936	0				GLI3
GLI2	ENSG00000074047	ENST00000314490	4				IKZF1
NR4A2	ENSG00000153234	ENST00000539077	1				ZNF713
NR4A2	ENSG00000153234	ENST00000424077	1				ZNF479
NR4A2	ENSG00000153234	ENST00000339562	1				ZNF716
NR4A2	ENSG00000153234	ENST00000409572	1				ZNF679
SP5	ENSG00000204335	ENST00000375281	3				ZNF736
SP3	ENSG00000172845	ENST00000418194	0				ZNF680
SP3	ENSG00000172845	ENST00000310015	1				ZNF107
KLF7	ENSG00000118263	ENST00000412414	4				ZNF138
KLF7	ENSG00000118263	ENST00000309446	2				ZNF273
KLF7	ENSG00000118263	ENST00000426163	4				ZNF117
KLF7	ENSG00000118263	ENST00000457962	1				ZNF92
IKZF2	ENSG00000030419	ENST00000451136	0				GATAD1
IKZF2	ENSG00000030419	ENST00000457361	8				ZNF789
IKZF2	ENSG00000030419	ENST00000434687	2				ZNF394
IKZF2	ENSG00000030419	ENST00000452786	3				ZKSCAN5
ZNF142	ENSG00000115568	ENST00000450560	2				ZNF655
ZNF142	ENSG00000115568	ENST00000449707	2				ZSCAN25
ZNF142	ENSG00000115568	ENST00000432460	2				ZKSCAN1
ZNF142	ENSG00000115568	ENST00000411696	2				ZSCAN21
THAP4	ENSG00000176946	ENST00000402136	4				ZNF3
THAP4	ENSG00000176946	ENST00000407315	2				THAP5
PPARG	ENSG00000132170	ENST00000397010	1				ZNF277
PPARG	ENSG00000132170	ENST00000397029	1				FEZF1
PPARG	ENSG00000132170	ENST00000309576	6				ZNF800
PPARG	ENSG00000132170	ENST00000397015	7				CNOT4
PPARG	ENSG00000132170	ENST00000455517	4				ZNF786
PPARG	ENSG00000132170	ENST00000438682	5				ZNF425
PPARG	ENSG00000132170	ENST00000539812	2				ZNF398
PPARG	ENSG00000132170	ENST00000287820	0				ZNF282
NR2C2	ENSG00000177463	ENST00000435454	5				ZNF212
NR2C2	ENSG00000177463	ENST00000323373	5				ZNF777
NR2C2	ENSG00000177463	ENST00000437120	0				ZNF746
NR2C2	ENSG00000177463	ENST00000406272	0				ZNF467
NR1D2	ENSG00000174738	ENST00000312521	6				ZNF775
THRB	ENSG00000151090	ENST00000396671	3				ZNF596
THRB	ENSG00000151090	ENST00000416420	3				ZNF705G
THRB	ENSG00000151090	ENST00000356447	3				GATA4
THRB	ENSG00000151090	ENST00000453729	3				ZNF705D
RARB	ENSG00000077092	ENST00000404969	4				EGR3
RARB	ENSG00000077092	ENST00000437042	0				KAT6A
RARB	ENSG00000077092	ENST00000330688	0				THAP1
RARB	ENSG00000077092	ENST00000458646	5				SNAI2
ZNF860	ENSG00000197385	ENST00000360311	5				ST18
ZNF619	ENSG00000177873	ENST00000314686	1				PLAG1
ZNF619	ENSG00000177873	ENST00000456778	1				PRDM14
ZNF619	ENSG00000177873	ENST00000522736	2				HNF4G
ZNF619	ENSG00000177873	ENST00000521353	2				OSR2
ZNF620	ENSG00000177842	ENST00000420891	0				KLF10
ZNF620	ENSG00000177842	ENST00000314529	0				ZFPM2
ZNF621	ENSG00000172888	ENST00000403205	1				TRPS1
ZNF621	ENSG00000172888	ENST00000339296	1				ZNF572
ZNF621	ENSG00000172888	ENST00000453351	0				ZFAT
ZBTB47	ENSG00000114853	ENST00000232974	2				ZFP41
ZNF662	ENSG00000182983	ENST00000440367	1				GLI4
ZNF662	ENSG00000182983	ENST00000328199	3				ZNF696
ZNF445	ENSG00000185219	ENST00000425708	1				ZNF623
ZKSCAN7	ENSG00000196345	ENST00000426540	1				ZNF707
ZKSCAN7	ENSG00000196345	ENST00000341840	1				ZNF251
ZKSCAN7	ENSG00000196345	ENST00000273320	1				ZNF34
ZNF660	ENSG00000144792	ENST00000416644	5				ZNF517
ZNF197	ENSG00000186448	ENST00000412641	2				ZNF7
ZNF660	ENSG00000144792	ENST00000441021	2				ZNF250
ZNF197	ENSG00000186448	ENST00000344387	2				ZNF16
ZNF197	ENSG00000186448	ENST00000396058	2				DMRT1
ZNF35	ENSG00000169981	ENST00000396056	1				DMRT3
ZNF35	ENSG00000169981	ENST00000432115	1				DMRT2
ZNF35	ENSG00000169981	ENST00000542250	1				GLIS3
ZNF502	ENSG00000196653	ENST00000449836	1				BNC2
ZNF502	ENSG00000196653	ENST00000436624	1				DMRTA1
ZNF502	ENSG00000196653	ENST00000411443	1				ZBTB5
ZNF501	ENSG00000186446	ENST00000396048	5				KLF9
ZNF589	ENSG00000164048	ENST00000354698	5				RORB
FEZF2	ENSG00000153266	ENST00000475839	1				ZNF484
FEZF2	ENSG00000153266	ENST00000283268	1				ZNF169
FEZF2	ENSG00000153266	ENST00000486811	4				ZNF510
ZNF717	ENSG00000227124	ENST00000422325	9				ZNF782
ZNF717	ENSG00000227124	ENST00000400845	6				NR4A3
ZNF654	ENSG00000175105	ENST00000309495	0				ZNF189
ZBTB11	ENSG00000066422	ENST00000312938	2				ZNF462
ZBED2	ENSG00000177494	ENST00000317012	0				KLF4
ZNF80	ENSG00000174255	ENST00000482457	6				ZNF483
ZBTB20	ENSG00000181722	ENST00000474710	4				ZFP37
ZBTB20	ENSG00000181722	ENST00000470311	5				ZNF618
ZBTB20	ENSG00000181722	ENST00000482689	5				RC3H2
ZBTB20	ENSG00000181722	ENST00000481632	0				ZBTB6
ZBTB20	ENSG00000181722	ENST00000393785	3				ZBTB26
ZBTB20	ENSG00000181722	ENST00000464560	1				NR5A1
ZBTB20	ENSG00000181722	ENST00000471418	3				NR6A1
ZBTB20	ENSG00000181722	ENST00000462705	1				ZBTB43
ZBTB20	ENSG00000181722	ENST00000357258	2				ZBTB34
NR1I2	ENSG00000144852	ENST00000393716	4				ZNF79
NR1I2	ENSG00000144852	ENST00000337940	6				GFI1B
ZNF148	ENSG00000163848	ENST00000495019	5				RXRA
ZNF148	ENSG00000163848	ENST00000465763	2				KLF6
ZNF148	ENSG00000163848	ENST00000492394	3				GATA3
ZNF148	ENSG00000163848	ENST00000471196	3				ZNF438
ZNF148	ENSG00000163848	ENST00000544464	3				ZNF248
ZNF148	ENSG00000163848	ENST00000485866	3				ZNF25
ZNF148	ENSG00000163848	ENST00000360647	3				ZNF33A
KLF15	ENSG00000163884	ENST00000296233	2				ZNF37A
ZXDC	ENSG00000070476	ENST00000336332	8				ZNF33B
ZXDC	ENSG00000070476	ENST00000389709	8				ZNF239
GATA2	ENSG00000179348	ENST00000430265	2				ZNF485
GATA2	ENSG00000179348	ENST00000487848	2				ZNF32
GATA2	ENSG00000179348	ENST00000492608	5				ZNF22
GATA2	ENSG00000179348	ENST00000498200	2				EGR2
GATA2	ENSG00000179348	ENST00000341105	2				TET1
ZBTB38	ENSG00000177311	ENST00000509842	2				KAT6B
ZBTB38	ENSG00000177311	ENST00000507722	1				IKZF5
ZBTB38	ENSG00000177311	ENST00000503809	1				ZNF511
ZBTB38	ENSG00000177311	ENST00000513258	1				ZNF195
ZBTB38	ENSG00000177311	ENST00000509883	1				ZNF215
ZBTB38	ENSG00000177311	ENST00000514251	1				ZNF214
ZBTB38	ENSG00000177311	ENST00000510338	0				ZNF143
ZBTB38	ENSG00000177311	ENST00000504673	0				WT1
ZBTB38	ENSG00000177311	ENST00000513570	4				ZNF408
ZBTB38	ENSG00000177311	ENST00000321464	4				NR1H3
ZBTB38	ENSG00000177311	ENST00000510726	4				ZFP91
ZBTB38	ENSG00000177311	ENST00000509813	3				MTA2
ZIC4	ENSG00000174963	ENST00000484586	3				ESRRA
ZIC4	ENSG00000174963	ENST00000525172	1				KAT5
ZIC4	ENSG00000174963	ENST00000425731	0				OVOL1
ZIC4	ENSG00000174963	ENST00000462748	0				KDM2A
ZIC4	ENSG00000174963	ENST00000463250	4				PRKRIR
ZIC4	ENSG00000174963	ENST00000383075	5				PGR
ZIC1	ENSG00000152977	ENST00000282928	0				ZBTB16
MECOM	ENSG00000085276	ENST00000466623	4				KMT2A
MECOM	ENSG00000085276	ENST00000460890	4				HINFP
MECOM	ENSG00000085276	ENST00000264674	4				ZNF202
MECOM	ENSG00000085276	ENST00000475754	3				PRDM10
MECOM	ENSG00000085276	ENST00000468789	2				ZBTB44
MECOM	ENSG00000085276	ENST00000481315	3				ZNF384
MECOM	ENSG00000085276	ENST00000494292	6				ZNF705A
MYNN	ENSG00000085274	ENST00000349841	3				AEBP2
MYNN	ENSG00000085274	ENST00000392733	2				VDR
MYNN	ENSG00000085274	ENST00000356716	2				ZNF641
MYNN	ENSG00000085274	ENST00000544106	4				KMT2D
ZNF639	ENSG00000121864	ENST00000496856	5				NR4A1
ZNF639	ENSG00000121864	ENST00000491818	6				ZNF740
ZNF639	ENSG00000121864	ENST00000481587	6				RARG
ZNF639	ENSG00000121864	ENST00000326361	4				SP7
ZNF639	ENSG00000121864	ENST00000466264	1				SP1
ZNF639	ENSG00000121864	ENST00000484866	3				IKZF4
ZNF639	ENSG00000121864	ENST00000494234	5				ZBTB39
BCL6	ENSG00000113916	ENST00000430339	5				GLI1
BCL6	ENSG00000113916	ENST00000232014	4				THAP2
BCL6	ENSG00000113916	ENST00000438077	4				NR2C1
BCL6	ENSG00000113916	ENST00000406870	3				NR1H4
ZNF732	ENSG00000186777	ENST00000419098	3				PRDM4
ZNF141	ENSG00000131127	ENST00000240499	8				ZNF664
ZNF721	ENSG00000182903	ENST00000338977	2				ZNF605
ZNF721	ENSG00000182903	ENST00000511833	2				ZNF26
LYAR	ENSG00000145220	ENST00000452476	7				ZNF84
LYAR	ENSG00000145220	ENST00000513174	8				ZNF140
LYAR	ENSG00000145220	ENST00000343470	9				ZNF891
ZBTB49	ENSG00000168826	ENST00000355834	8				ZNF10
ZBTB49	ENSG00000168826	ENST00000538529	8				ZNF268
ZBTB49	ENSG00000168826	ENST00000502918	8				KLF5
ZNF518B	ENSG00000178163	ENST00000326756	1				KLF12
ZNF518B	ENSG00000178163	ENST00000507515	1				ZIC5
KLF3	ENSG00000109787	ENST00000261438	1				ZIC2
REST	ENSG00000084093	ENST00000309042	6				ZNF219
THAP6	ENSG00000174796	ENST00000506261	3				SALL2
THAP6	ENSG00000174796	ENST00000504218	1				INSM2
THAP6	ENSG00000174796	ENST00000311638	0				ESR2
THAP6	ENSG00000174796	ENST00000514480	0				ZBTB1
PRDM8	ENSG00000152784	ENST00000504452	4				ZBTB25
PRDM8	ENSG00000152784	ENST00000515013	6				ZNF410
PRDM8	ENSG00000152784	ENST00000415738	4				ESRRB
THAP9	ENSG00000168152	ENST00000302236	1				BCL11B
PRDM5	ENSG00000138738	ENST00000264808	2				YY1
PRDM5	ENSG00000138738	ENST00000428209	2				ZBTB42
PRDM5	ENSG00000138738	ENST00000394435	2				MTA1
ZNF827	ENSG00000151612	ENST00000513320	2				KLF13
ZNF827	ENSG00000151612	ENST00000508784	2				ZNF770
NR3C2	ENSG00000151623	ENST00000512865	3				ZSCAN29
NR3C2	ENSG00000151623	ENST00000355292	2				ZNF280D
NR3C2	ENSG00000151623	ENST00000344721	4				RORA
ZFP42	ENSG00000179059	ENST00000509524	0				THAP10
PRDM9	ENSG00000164256	ENST00000502755	2				BNC1
PRDM9	ENSG00000164256	ENST00000296682	3				ZSCAN2
ZNF131	ENSG00000172262	ENST00000515326	2				ZNF592
ZNF131	ENSG00000172262	ENST00000509156	3				ZNF710
ZNF131	ENSG00000172262	ENST00000508259	3				ZNF774
ZNF131	ENSG00000172262	ENST00000306938	3				NR2F2
ZNF131	ENSG00000172262	ENST00000505606	2				E4F1
ZNF131	ENSG00000172262	ENST00000509634	2				ZSCAN10
ZNF131	ENSG00000172262	ENST00000509341	2				ZNF205
ZNF366	ENSG00000178175	ENST00000318442	5				ZNF213
ZBED3	ENSG00000132846	ENST00000511587	2				ZNF200
ZBED3	ENSG00000132846	ENST00000255198	2				ZNF263
NR2F1	ENSG00000175745	ENST00000327111	6				ZNF75A
PRDM6	ENSG00000061455	ENST00000407847	10				ZSCAN32
EGR1	ENSG00000120738	ENST00000239938	1				ZNF174
NR3C1	ENSG00000113580	ENST00000424646	7				ZNF597
NR3C1	ENSG00000113580	ENST00000502500	2				GLIS2
NR3C1	ENSG00000113580	ENST00000510170	7				ZNF500
NR3C1	ENSG00000113580	ENST00000415690	12				ZKSCAN2
NR3C1	ENSG00000113580	ENST00000231509	7				MAZ
NR3C1	ENSG00000113580	ENST00000394464	7				ZNF48
NR3C1	ENSG00000113580	ENST00000508760	4				ZNF771
NR3C1	ENSG00000113580	ENST00000394466	6				ZNF768
NR3C1	ENSG00000113580	ENST00000416954	9				ZNF764
NR3C1	ENSG00000113580	ENST00000503201	7				ZNF785
NR3C1	ENSG00000113580	ENST00000502892	5				ZNF689
NR3C1	ENSG00000113580	ENST00000514699	5				ZNF629
NR3C1	ENSG00000113580	ENST00000504572	5				ZNF668
NR3C1	ENSG00000113580	ENST00000343796	6				ZNF646
ZNF300	ENSG00000145908	ENST00000394226	6				KAT8
ZNF300	ENSG00000145908	ENST00000446148	6				ZNF267
ZNF354A	ENSG00000169131	ENST00000520331	8				ZNF423
ZNF354A	ENSG00000169131	ENST00000335815	4				SALL1
ZNF354B	ENSG00000178338	ENST00000322434	7				ZNF319
ZNF354B	ENSG00000178338	ENST00000520377	11				CTCF
ZFP2	ENSG00000198939	ENST00000361362	13				THAP11
ZFP2	ENSG00000198939	ENST00000520660	13				ZFP90
ZFP2	ENSG00000198939	ENST00000520805	13				ZNF23
ZFP2	ENSG00000198939	ENST00000520301	0				ZNF19
ZNF454	ENSG00000178187	ENST00000320129	5				ZFP1
ZNF454	ENSG00000178187	ENST00000519564	5				ZNF469
ZNF879	ENSG00000234284	ENST00000444149	7				ZFPM1
ZNF879	ENSG00000234284	ENST00000522442	7				SNAI3
ZNF879	ENSG00000234284	ENST00000521285	9				ZNF778
ZNF354C	ENSG00000177932	ENST00000315475	4				ZNF276
ZFP62	ENSG00000196670	ENST00000509066	7				HIC1
ZFP62	ENSG00000196670	ENST00000504225	6				ZFP3
ZFP62	ENSG00000196670	ENST00000512132	6				ZNF232
ZFP62	ENSG00000196670	ENST00000359141	6				ZNF594
RREB1	ENSG00000124782	ENST00000379933	3				BCL6B
RREB1	ENSG00000124782	ENST00000491191	2				ZBTB4
RREB1	ENSG00000124782	ENST00000379938	2				ZNF18
RREB1	ENSG00000124782	ENST00000471433	2				ZNF287
RREB1	ENSG00000124782	ENST00000467782	3				ZNF624
RREB1	ENSG00000124782	ENST00000334984	3				ZNF286B
RREB1	ENSG00000124782	ENST00000483150	2				IKZF3
HIVEP1	ENSG00000095951	ENST00000491710	1				THRA
HIVEP1	ENSG00000095951	ENST00000487103	3				NR1D1
HIVEP1	ENSG00000095951	ENST00000379388	1				RARA
HIVEP1	ENSG00000095951	ENST00000478545	2				SP6
HIVEP1	ENSG00000095951	ENST00000541134	1				SP2
ZNF322	ENSG00000181315	ENST00000471278	2				ZNF652
ZNF322	ENSG00000181315	ENST00000480036	1				KAT7
ZNF322	ENSG00000181315	ENST00000415922	3				VEZF1
ZNF391	ENSG00000124613	ENST00000244576	6				ZBTB14
ZNF391	ENSG00000124613	ENST00000461521	7				ZNF519
ZNF184	ENSG00000096654	ENST00000377419	3				GATA6
ZNF184	ENSG00000096654	ENST00000211936	3				ZNF521
ZNF165	ENSG00000197279	ENST00000377325	5				ZNF397
ZSCAN16	ENSG00000196812	ENST00000340487	3				ZSCAN30
ZKSCAN8	ENSG00000198315	ENST00000457389	2				ZNF24
ZSCAN9	ENSG00000137185	ENST00000531941	2				ZNF396
ZSCAN9	ENSG00000137185	ENST00000252207	3				ZBTB7C
ZSCAN9	ENSG00000137185	ENST00000526391	4				MBD1
ZKSCAN4	ENSG00000187626	ENST00000377294	3				CXXC1
ZKSCAN4	ENSG00000187626	ENST00000423974	4				ZNF532
ZSCAN31	ENSG00000235109	ENST00000439636	4				ZNF407
ZSCAN31	ENSG00000235109	ENST00000447021	3				ZNF516
ZSCAN31	ENSG00000235109	ENST00000439158	5				ZNF236
ZSCAN31	ENSG00000235109	ENST00000344279	5				SALL3
ZSCAN31	ENSG00000235109	ENST00000453745	5				ADNP2
ZSCAN31	ENSG00000235109	ENST00000426756	6				KLF16
ZKSCAN3	ENSG00000189298	ENST00000252211	4				ZNF554
ZKSCAN3	ENSG00000189298	ENST00000341464	4				ZNF555
ZSCAN31	ENSG00000235109	ENST00000444081	6				ZNF556
ZSCAN31	ENSG00000235109	ENST00000446222	5				ZNF57
ZSCAN31	ENSG00000235109	ENST00000396838	5				ZNF77
ZSCAN31	ENSG00000235109	ENST00000434036	6				ZBTB7A
ZSCAN31	ENSG00000235109	ENST00000414429	5				ZNF557
ZSCAN12	ENSG00000158691	ENST00000396827	10				ZNF358
ZSCAN12	ENSG00000158691	ENST00000361028	10				ZNF414
ZSCAN23	ENSG00000187987	ENST00000289788	8				ZNF558
ZNF311	ENSG00000197935	ENST00000377179	3				ZNF317
ZFP57	ENSG00000204644	ENST00000376881	3				ZNF699
ZFP57	ENSG00000204644	ENST00000488757	4				ZNF559
ZFP57	ENSG00000204644	ENST00000376883	13				ZNF177
ZBTB12	ENSG00000204366	ENST00000375527	4				ZNF266
RXRB	ENSG00000204231	ENST00000413614	1				ZNF560
RXRB	ENSG00000204231	ENST00000374680	1				ZNF426
RXRB	ENSG00000204231	ENST00000544186	1				ZNF121
ZBTB22	ENSG00000236104	ENST00000431845	1				ZNF561
ZBTB22	ENSG00000236104	ENST00000441117	1				ZNF562
ZBTB22	ENSG00000236104	ENST00000418724	1				ZNF812
ZNF76	ENSG00000065029	ENST00000469195	1				ZNF846
ZNF76	ENSG00000065029	ENST00000373953	3				DNMT1
ZNF76	ENSG00000065029	ENST00000440666	3				ZGLP1
ZNF76	ENSG00000065029	ENST00000339411	3				ZNF653
PPARD	ENSG00000112033	ENST00000444397	2				ZNF627
PPARD	ENSG00000112033	ENST00000337400	2				ZNF823
PPARD	ENSG00000112033	ENST00000540939	2				ZNF441
TRERF1	ENSG00000124496	ENST00000372922	1				ZNF491
TRERF1	ENSG00000124496	ENST00000541110	1				ZNF440
ZNF451	ENSG00000112200	ENST00000370706	4				ZNF439
ZNF451	ENSG00000112200	ENST00000357489	4				ZNF69
ZNF451	ENSG00000112200	ENST00000370708	4				ZNF763
ZNF292	ENSG00000188994	ENST00000369577	1				ZNF433
PRDM13	ENSG00000112238	ENST00000369215	1				ZNF878
PRDM1	ENSG00000057657	ENST00000369096	0				ZNF844
NR2E1	ENSG00000112333	ENST00000368986	1				ZNF20
ZBTB24	ENSG00000112365	ENST00000230122	4				ZNF136
HIVEP2	ENSG00000010818	ENST00000367604	3				ZNF44
HIVEP2	ENSG00000010818	ENST00000367603	0				ZNF563
PLAGL1	ENSG00000118495	ENST00000367571	2				ZNF442
PLAGL1	ENSG00000118495	ENST00000367572	0				ZNF799
PLAGL1	ENSG00000118495	ENST00000360537	2				ZNF443
PLAGL1	ENSG00000118495	ENST00000354765	2				ZNF709
PLAGL1	ENSG00000118495	ENST00000417959	3				ZNF564
PLAGL1	ENSG00000118495	ENST00000429150	3				ZNF490
PLAGL1	ENSG00000118495	ENST00000444202	2				ZNF791
ZBTB2	ENSG00000181472	ENST00000325144	2				KLF1
ESR1	ENSG00000091831	ENST00000404742	0				ZNF333
ESR1	ENSG00000091831	ENST00000338799	5				WIZ
ESR1	ENSG00000091831	ENST00000456483	2				KLF2
ESR1	ENSG00000091831	ENST00000446550	1				NR2F6
ESR1	ENSG00000091831	ENST00000443427	1				GATAD2A
ESR1	ENSG00000091831	ENST00000206249	3				ZNF101
ESR1	ENSG00000091831	ENST00000406599	3				ZNF14
RBAK	ENSG00000146587	ENST00000353796	9				ZNF506
RBAK	ENSG00000146587	ENST00000396912	8				ZNF253
ZNF853	ENSG00000236609	ENST00000457543	2				ZNF93
SP8	ENSG00000164651	ENST00000418710	1				ZNF682
SP4	ENSG00000105866	ENST00000222584	4				ZNF90
GLI3	ENSG00000106571	ENST00000448703	4				ZNF737
GLI3	ENSG00000106571	ENST00000395925	4				ZNF626
IKZF1	ENSG00000185811	ENST00000359197	4				ZNF85
IKZF1	ENSG00000185811	ENST00000438033	2				ZNF430
IKZF1	ENSG00000185811	ENST00000439701	2				ZNF714
ZNF713	ENSG00000178665	ENST00000429591	1				ZNF431
ZNF479	ENSG00000185177	ENST00000331162	3				ZNF708
ZNF716	ENSG00000182111	ENST00000420713	7				ZNF493
ZNF679	ENSG00000197123	ENST00000421025	7				ZNF100
ZNF679	ENSG00000197123	ENST00000255746	3				ZNF43
ZNF736	ENSG00000234444	ENST00000355095	4				ZNF257
ZNF680	ENSG00000173041	ENST00000309683	6				ZNF676
ZNF107	ENSG00000196247	ENST00000360117	4				ZNF729
ZNF107	ENSG00000196247	ENST00000344930	4				ZNF98
ZNF107	ENSG00000196247	ENST00000423627	8				ZNF492
ZNF107	ENSG00000196247	ENST00000395391	7				ZNF99
ZNF138	ENSG00000197008	ENST00000359735	6				ZNF730
ZNF138	ENSG00000197008	ENST00000397136	3				ZNF91
ZNF273	ENSG00000198039	ENST00000476120	4				ZNF675
ZNF273	ENSG00000198039	ENST00000319636	4				ZNF681
ZNF273	ENSG00000198039	ENST00000545510	4				ZNF726
ZNF117	ENSG00000152926	ENST00000282869	6				ZNF254
ZNF92	ENSG00000146757	ENST00000328747	2				ZNF536
ZNF92	ENSG00000146757	ENST00000357512	1				ZNF507
ZNF92	ENSG00000146757	ENST00000450302	1				ZNF302
GATAD1	ENSG00000157259	ENST00000287957	3				ZNF181
ZNF789	ENSG00000198556	ENST00000331410	6				ZNF599
ZNF789	ENSG00000198556	ENST00000379724	5				ZNF30
ZNF394	ENSG00000160908	ENST00000337673	2				ZNF792
ZKSCAN5	ENSG00000196652	ENST00000326775	4				ZBTB32
ZKSCAN5	ENSG00000196652	ENST00000451158	4				THAP8
ZKSCAN5	ENSG00000196652	ENST00000394170	2				OVOL3
ZNF655	ENSG00000197343	ENST00000320583	0				ZNF565
ZNF655	ENSG00000197343	ENST00000357864	0				ZNF146
ZNF655	ENSG00000197343	ENST00000452314	1				ZFP14
ZNF655	ENSG00000197343	ENST00000252713	1				ZFP82
ZNF655	ENSG00000197343	ENST00000493277	1				ZNF566
ZNF655	ENSG00000197343	ENST00000422164	4				ZNF260
ZNF655	ENSG00000197343	ENST00000422647	4				ZNF529
ZNF655	ENSG00000197343	ENST00000424881	4				ZNF382
ZNF655	ENSG00000197343	ENST00000440391	4				ZNF461
ZNF655	ENSG00000197343	ENST00000394163	4				ZNF567
ZSCAN25	ENSG00000197037	ENST00000394152	2				ZNF790
ZSCAN25	ENSG00000197037	ENST00000431485	3				ZNF345
ZSCAN25	ENSG00000197037	ENST00000334715	1				ZNF829
ZSCAN25	ENSG00000197037	ENST00000262941	1				ZNF568
ZKSCAN1	ENSG00000106261	ENST00000324306	1				ZNF420
ZKSCAN1	ENSG00000106261	ENST00000535170	1				ZNF585A
ZKSCAN1	ENSG00000106261	ENST00000432317	2				ZNF383
ZSCAN21	ENSG00000166529	ENST00000543588	1				HKR1
ZSCAN21	ENSG00000166529	ENST00000292450	1				ZNF527
ZSCAN21	ENSG00000166529	ENST00000438937	1				ZNF569
ZNF3	ENSG00000166526	ENST00000415068	3				ZNF570
ZNF3	ENSG00000166526	ENST00000303915	0				ZNF793
ZNF3	ENSG00000166526	ENST00000413658	3				ZNF540
ZNF3	ENSG00000166526	ENST00000449785	3				ZNF571
ZNF3	ENSG00000166526	ENST00000299667	3				ZFP30
ZNF3	ENSG00000166526	ENST00000424697	3				ZNF781
ZNF3	ENSG00000166526	ENST00000428683	0				ZNF607
THAP5	ENSG00000177683	ENST00000313516	2				ZNF573
THAP5	ENSG00000177683	ENST00000415914	2				ZNF546
ZNF277	ENSG00000198839	ENST00000361822	1				ZNF780B
FEZF1	ENSG00000128610	ENST00000331178	4				ZNF780A
FEZF1	ENSG00000128610	ENST00000427185	4				DMRTC2
FEZF1	ENSG00000128610	ENST00000442488	4				ZNF574
FEZF1	ENSG00000128610	ENST00000418046	2				ZNF526
ZNF800	ENSG00000048405	ENST00000436992	6				ZNF575
ZNF800	ENSG00000048405	ENST00000393312	7				ZNF576
ZNF800	ENSG00000048405	ENST00000393313	3				ZNF283
ZNF800	ENSG00000048405	ENST00000265827	3				ZNF404
ZNF800	ENSG00000048405	ENST00000434602	1				ZNF45
ZNF800	ENSG00000048405	ENST00000439506	5				ZNF221
CNOT4	ENSG00000080802	ENST00000414802	1				ZNF155
CNOT4	ENSG00000080802	ENST00000428680	2				ZNF230
CNOT4	ENSG00000080802	ENST00000423368	2				ZNF222
CNOT4	ENSG00000080802	ENST00000361528	2				ZNF223
CNOT4	ENSG00000080802	ENST00000356162	2				ZNF284
CNOT4	ENSG00000080802	ENST00000541284	2				ZNF224
ZNF786	ENSG00000197362	ENST00000491431	2				ZNF225
ZNF786	ENSG00000197362	ENST00000451334	2				ZNF226
ZNF425	ENSG00000204947	ENST00000378061	4				ZNF227
ZNF398	ENSG00000197024	ENST00000426851	3				ZNF233
ZNF398	ENSG00000197024	ENST00000420008	3				ZNF235
ZNF398	ENSG00000197024	ENST00000475153	3				ZNF112
ZNF398	ENSG00000197024	ENST00000483892	1				ZNF180
ZNF398	ENSG00000197024	ENST00000491174	1				ZNF296
ZNF398	ENSG00000197024	ENST00000540950	1				ZC3H4
ZNF398	ENSG00000197024	ENST00000335901	6				ZNF541
ZNF282	ENSG00000170265	ENST00000262085	0				ZNF114
ZNF212	ENSG00000170260	ENST00000335870	3				NR1H2
ZNF777	ENSG00000196453	ENST00000247930	2				ZNF175
ZNF746	ENSG00000181220	ENST00000458143	1				ZNF577
ZNF746	ENSG00000181220	ENST00000340622	1				ZNF649
ZNF467	ENSG00000181444	ENST00000302017	1				ZNF613
ZNF775	ENSG00000196456	ENST00000329630	2				ZNF350
ZNF775	ENSG00000196456	ENST00000490973	3				ZNF615
ZNF596	ENSG00000172748	ENST00000320552	7				ZNF614
ZNF596	ENSG00000172748	ENST00000522866	7				ZNF432
ZNF705G	ENSG00000215372	ENST00000400078	2				ZNF841
ZNF705G	ENSG00000215372	ENST00000400156	2				ZNF616
GATA4	ENSG00000136574	ENST00000532977	2				ZNF836
GATA4	ENSG00000136574	ENST00000526974	1				ZNF766
GATA4	ENSG00000136574	ENST00000335135	3				ZNF480
ZNF705D	ENSG00000215343	ENST00000400085	0				ZNF610
EGR3	ENSG00000179388	ENST00000317216	0				ZNF880
KAT6A	ENSG00000083168	ENST00000265713	3				ZNF528
KAT6A	ENSG00000083168	ENST00000426524	3				ZNF534
THAP1	ENSG00000131931	ENST00000345117	0				ZNF578
THAP1	ENSG00000131931	ENST00000254250	1				ZNF808
SNAI2	ENSG00000019549	ENST00000020945	2				ZNF701
SNAI2	ENSG00000019549	ENST00000396822	2				ZNF83
ST18	ENSG00000147488	ENST00000519118	3				ZNF611
ST18	ENSG00000147488	ENST00000276480	5				ZNF600
ST18	ENSG00000147488	ENST00000517580	5				ZNF28
PLAG1	ENSG00000181690	ENST00000316981	0				ZNF468
PLAG1	ENSG00000181690	ENST00000423799	0				ZNF320
PRDM14	ENSG00000147596	ENST00000276594	2				ZNF816
PRDM14	ENSG00000147596	ENST00000426346	3				ZNF160
HNF4G	ENSG00000164749	ENST00000354370	5				ZNF415
HNF4G	ENSG00000164749	ENST00000396423	3				ZNF347
OSR2	ENSG00000164920	ENST00000297565	3				ZNF665
OSR2	ENSG00000164920	ENST00000435298	3				ZNF677
OSR2	ENSG00000164920	ENST00000522510	3				ZNF845
OSR2	ENSG00000164920	ENST00000518199	2				ZNF765
KLF10	ENSG00000155090	ENST00000285407	5				ZNF813
ZFPM2	ENSG00000169946	ENST00000407775	1				ZNF331
ZFPM2	ENSG00000169946	ENST00000378472	2				ZNF628
TRPS1	ENSG00000104447	ENST00000520276	1				ZNF579
TRPS1	ENSG00000104447	ENST00000220888	2				FIZ1
TRPS1	ENSG00000104447	ENST00000395715	1				ZNF524
ZNF572	ENSG00000180938	ENST00000319286	1				ZNF784
ZFAT	ENSG00000066827	ENST00000520727	3				ZNF580
ZFAT	ENSG00000066827	ENST00000377838	2				ZNF581
ZFP41	ENSG00000181638	ENST00000520584	4				ZNF787
ZFP41	ENSG00000181638	ENST00000330701	2				ZNF444
GLI4	ENSG00000250571	ENST00000340042	2				ZSCAN5B
GLI4	ENSG00000250571	ENST00000523522	3				ZSCAN5A
ZNF696	ENSG00000185730	ENST00000518575	3				ZNF582
ZNF696	ENSG00000185730	ENST00000330143	7				ZNF583
ZNF696	ENSG00000185730	ENST00000518432	7				ZNF667
ZNF623	ENSG00000183309	ENST00000526926	6				ZNF471
ZNF623	ENSG00000183309	ENST00000458270	4				ZFP28
ZNF623	ENSG00000183309	ENST00000501748	5				ZNF470
ZNF707	ENSG00000181135	ENST00000454097	7				ZNF71
ZNF707	ENSG00000181135	ENST00000534303	7				ZNF835
ZNF707	ENSG00000181135	ENST00000529833	7				PEG3
ZNF707	ENSG00000181135	ENST00000358656	7				ZIM3
ZNF707	ENSG00000181135	ENST00000526970	8				ZNF264
ZNF707	ENSG00000181135	ENST00000532158	8				ZNF805
ZNF707	ENSG00000181135	ENST00000532205	7				ZNF460
ZNF707	ENSG00000181135	ENST00000418203	4				ZNF543
ZNF251	ENSG00000198169	ENST00000292562	2				ZNF304
ZNF34	ENSG00000196378	ENST00000343459	9				ZNF547
ZNF34	ENSG00000196378	ENST00000429371	8				ZNF548
ZNF517	ENSG00000197363	ENST00000359971	12				ZNF17
ZNF517	ENSG00000197363	ENST00000531720	6				ZNF749
ZNF7	ENSG00000147789	ENST00000325241	6				ZNF772
ZNF7	ENSG00000147789	ENST00000544249	5				ZNF419
ZNF7	ENSG00000147789	ENST00000528372	4				ZNF773
ZNF250	ENSG00000196150	ENST00000543949	1				ZNF549
ZNF250	ENSG00000196150	ENST00000292579	1				ZNF550
ZNF250	ENSG00000196150	ENST00000342660	1				ZNF416
ZNF16	ENSG00000170631	ENST00000527811	5				ZIK1
ZNF16	ENSG00000170631	ENST00000532351	3				ZNF530
ZNF16	ENSG00000170631	ENST00000276816	2				ZNF134
DMRT1	ENSG00000137090	ENST00000382276	4				ZNF211
DMRT3	ENSG00000064218	ENST00000190165	9				ZSCAN4
DMRT3	ENSG00000064218	ENST00000417254	8				ZNF551
DMRT2	ENSG00000173253	ENST00000382255	2				ZNF154
DMRT2	ENSG00000173253	ENST00000412350	2				ZNF671
DMRT2	ENSG00000173253	ENST00000302441	6				ZNF776
DMRT2	ENSG00000173253	ENST00000358146	2				ZNF586
GLIS3	ENSG00000107249	ENST00000462164	14				ZNF552
GLIS3	ENSG00000107249	ENST00000478315	4				ZNF587
GLIS3	ENSG00000107249	ENST00000324333	4				ZNF814
GLIS3	ENSG00000107249	ENST00000478844	4				ZNF417
GLIS3	ENSG00000107249	ENST00000381971	6				ZNF418
BNC2	ENSG00000173068	ENST00000545497	3				ZNF256
BNC2	ENSG00000173068	ENST00000380672	4				ZNF606
BNC2	ENSG00000173068	ENST00000380666	5				ZSCAN1
DMRTA1	ENSG00000176399	ENST00000325870	8				ZNF135
ZBTB5	ENSG00000168795	ENST00000307750	4				ZNF329
KLF9	ENSG00000119138	ENST00000377126	1				ZNF274
RORB	ENSG00000198963	ENST00000376896	2				ZNF544
RORB	ENSG00000198963	ENST00000396204	3				ZSCAN22
ZNF484	ENSG00000127081	ENST00000395505	7				ZNF497
ZNF484	ENSG00000127081	ENST00000395506	1				ZNF837
ZNF484	ENSG00000127081	ENST00000375495	1				ZNF584
ZNF484	ENSG00000127081	ENST00000332591	1				ZNF132
ZNF169	ENSG00000175787	ENST00000395395	2				ZNF324B
ZNF169	ENSG00000175787	ENST00000375354	3				ZNF324
ZNF510	ENSG00000081386	ENST00000223428	5				ZNF446
ZNF510	ENSG00000081386	ENST00000375231	5				ZBTB45
ZNF510	ENSG00000081386	ENST00000374641	5				MZF1
ZNF782	ENSG00000196597	ENST00000478850	8				SCRT2
ZNF782	ENSG00000196597	ENST00000481138	7				ZNF343
ZNF782	ENSG00000196597	ENST00000535338	0				OVOL2
NR4A3	ENSG00000119508	ENST00000338488	1				ZNF133
NR4A3	ENSG00000119508	ENST00000330847	0				INSM1
ZNF189	ENSG00000136870	ENST00000374861	2				GZF1
ZNF189	ENSG00000136870	ENST00000339664	2				ZNF337
ZNF462	ENSG00000148143	ENST00000457913	3				PLAGL2
ZNF462	ENSG00000148143	ENST00000542028	0				DNMT3B
KLF4	ENSG00000136826	ENST00000374672	2				ZNF341
KLF4	ENSG00000136826	ENST00000420475	2				L3MBTL1
ZNF483	ENSG00000173258	ENST00000358151	6				HNF4A
ZNF483	ENSG00000173258	ENST00000355824	6				ZNF335
ZNF483	ENSG00000173258	ENST00000374374	6				ZNF334
ZNF483	ENSG00000173258	ENST00000309235	7				SNAI1
ZFP37	ENSG00000136866	ENST00000553380	2				ADNP
ZFP37	ENSG00000136866	ENST00000374227	2				SALL4
ZFP37	ENSG00000136866	ENST00000555206	2				ZFP64
ZNF618	ENSG00000157657	ENST00000374126	1				ZNF217
ZNF618	ENSG00000157657	ENST00000452710	1				CTCFL
RC3H2	ENSG00000056586	ENST00000471874	3				GATA5
RC3H2	ENSG00000056586	ENST00000373670	4				ZGPAT
RC3H2	ENSG00000056586	ENST00000335387	1				ZBTB46
RC3H2	ENSG00000056586	ENST00000357244	1				ZNF512B
RC3H2	ENSG00000056586	ENST00000423239	1				MYT1
ZBTB6	ENSG00000186130	ENST00000373659	2				PRDM15
ZBTB26	ENSG00000171448	ENST00000373654	3				ZBTB21
ZBTB26	ENSG00000171448	ENST00000373656	3				DNMT3L
NR5A1	ENSG00000136931	ENST00000373587	0				ZNF74
NR5A1	ENSG00000136931	ENST00000455734	0				THAP7
NR5A1	ENSG00000136931	ENST00000373588	0				HIC2
NR6A1	ENSG00000148200	ENST00000487099	0				ZNF280A
NR6A1	ENSG00000148200	ENST00000416460	0				ZNF70
ZBTB43	ENSG00000169155	ENST00000449886	9				PATZ1
ZBTB43	ENSG00000169155	ENST00000373464	9				PPARA
ZBTB43	ENSG00000169155	ENST00000450858	9				ZBED4
ZBTB43	ENSG00000169155	ENST00000373457	5				ZBED1
ZBTB34	ENSG00000177125	ENST00000319119	4				YY2
ZBTB34	ENSG00000177125	ENST00000373452	3				ZFX
ZNF79	ENSG00000196152	ENST00000342483	2				NR0B1
ZNF79	ENSG00000196152	ENST00000543471	1				ZNF674
GFI1B	ENSG00000165702	ENST00000372124	5				ZNF157
GFI1B	ENSG00000165702	ENST00000339463	5				ZNF41
GFI1B	ENSG00000165702	ENST00000450530	4				ZNF81
GFI1B	ENSG00000165702	ENST00000372123	5				ZNF182
RXRA	ENSG00000186350	ENST00000481739	1				GATA1
RXRA	ENSG00000186350	ENST00000540193	4				KLF8
KLF6	ENSG00000067082	ENST00000469435	5				ZXDB
KLF6	ENSG00000067082	ENST00000497571	5				ZXDA
KLF6	ENSG00000067082	ENST00000542957	5				AR
GATA3	ENSG00000107485	ENST00000379328	6				DMRTC1B
GATA3	ENSG00000107485	ENST00000346208	6				ATRX
ZNF438	ENSG00000183621	ENST00000444692	3				ZNF711
ZNF438	ENSG00000183621	ENST00000331737	0				ZBTB33
ZNF438	ENSG00000183621	ENST00000538351	0				ZNF280C
ZNF438	ENSG00000183621	ENST00000436087	11				ZNF75D
ZNF248	ENSG00000198105	ENST00000374648	3				ZNF449
ZNF248	ENSG00000198105	ENST00000395867	4				ZIC3
ZNF248	ENSG00000198105	ENST00000395873	2				ZNF275
ZNF248	ENSG00000198105	ENST00000357328	3				ZFY
ZNF248	ENSG00000198105	ENST00000395874	3
ZNF25	ENSG00000175395	ENST00000302609	1
ZNF33A	ENSG00000189180	ENST00000374618	2
ZNF33A	ENSG00000189180	ENST00000432900	2
ZNF33A	ENSG00000189180	ENST00000458705	2
ZNF33A	ENSG00000189180	ENST00000307441	2
ZNF37A	ENSG00000075407	ENST00000351773	18
ZNF37A	ENSG00000075407	ENST00000361085	18
ZNF33B	ENSG00000196693	ENST00000359467	8
ZNF239	ENSG00000196793	ENST00000306006	3
ZNF239	ENSG00000196793	ENST00000374446	1
ZNF239	ENSG00000196793	ENST00000426961	1
ZNF485	ENSG00000198298	ENST00000374437	3
ZNF485	ENSG00000198298	ENST00000430885	3
ZNF485	ENSG00000198298	ENST00000374435	3
ZNF32	ENSG00000169740	ENST00000395797	4
ZNF32	ENSG00000169740	ENST00000374433	7
ZNF22	ENSG00000165512	ENST00000298299	4
EGR2	ENSG00000122877	ENST00000242480	1
EGR2	ENSG00000122877	ENST00000411732	1
EGR2	ENSG00000122877	ENST00000439032	6
TET1	ENSG00000138336	ENST00000373644	4
KAT6B	ENSG00000156650	ENST00000372724	1
KAT6B	ENSG00000156650	ENST00000287239	1
IKZF5	ENSG00000095574	ENST00000368886	9
ZNF511	ENSG00000198546	ENST00000361518	4
ZNF511	ENSG00000198546	ENST00000359035	5
ZNF511	ENSG00000198546	ENST00000368554	2
ZNF195	ENSG00000005801	ENST00000343338	4
ZNF195	ENSG00000005801	ENST00000005082	7
ZNF195	ENSG00000005801	ENST00000534569	7
ZNF195	ENSG00000005801	ENST00000529678	7
ZNF195	ENSG00000005801	ENST00000354599	7
ZNF195	ENSG00000005801	ENST00000526601	7
ZNF195	ENSG00000005801	ENST00000399602	7
ZNF195	ENSG00000005801	ENST00000429541	6
ZNF215	ENSG00000149054	ENST00000278319	2
ZNF215	ENSG00000149054	ENST00000414517	2
ZNF214	ENSG00000149050	ENST00000536068	3
ZNF214	ENSG00000149050	ENST00000278314	3
ZNF143	ENSG00000166478	ENST00000531943	3
ZNF143	ENSG00000166478	ENST00000396602	4
ZNF143	ENSG00000166478	ENST00000396597	4
ZNF143	ENSG00000166478	ENST00000438144	4
ZNF143	ENSG00000166478	ENST00000534265	4
ZNF143	ENSG00000166478	ENST00000412390	4
ZNF143	ENSG00000166478	ENST00000414370	5
ZNF143	ENSG00000166478	ENST00000417726	5
WT1	ENSG00000184937	ENST00000379079	7
WT1	ENSG00000184937	ENST00000452863	2
WT1	ENSG00000184937	ENST00000448076	5
WT1	ENSG00000184937	ENST00000332351	6
ZNF408	ENSG00000175213	ENST00000311764	2
NR1H3	ENSG00000025434	ENST00000436778	2
NR1H3	ENSG00000025434	ENST00000407404	2
NR1H3	ENSG00000025434	ENST00000444396	2
NR1H3	ENSG00000025434	ENST00000457932	2
NR1H3	ENSG00000025434	ENST00000449369	2
NR1H3	ENSG00000025434	ENST00000441012	2
NR1H3	ENSG00000025434	ENST00000437276	2
NR1H3	ENSG00000025434	ENST00000467728	1
NR1H3	ENSG00000025434	ENST00000405853	0
ZFP91	ENSG00000186660	ENST00000316059	5
MTA2	ENSG00000149480	ENST00000278823	4
ESRRA	ENSG00000173153	ENST00000406310	3
ESRRA	ENSG00000173153	ENST00000000442	3
ESRRA	ENSG00000173153	ENST00000405666	2
ESRRA	ENSG00000173153	ENST00000468670	3
KAT5	ENSG00000172977	ENST00000377046	1
KAT5	ENSG00000172977	ENST00000352980	1
KAT5	ENSG00000172977	ENST00000341318	0
OVOL1	ENSG00000172818	ENST00000335987	3
KDM2A	ENSG00000173120	ENST00000398645	1
KDM2A	ENSG00000173120	ENST00000529006	0
KDM2A	ENSG00000173120	ENST00000308783	0
PRKRIR	ENSG00000137492	ENST00000260045	4
PGR	ENSG00000082175	ENST00000325455	3
ZBTB16	ENSG00000109906	ENST00000335953	2
ZBTB16	ENSG00000109906	ENST00000544220	1
ZBTB16	ENSG00000109906	ENST00000535700	2
ZBTB16	ENSG00000109906	ENST00000392996	3
KMT2A	ENSG00000118058	ENST00000389506	0
HINFP	ENSG00000172273	ENST00000350777	1
ZNF202	ENSG00000166261	ENST00000336139	3
PRDM10	ENSG00000170325	ENST00000526082	0
PRDM10	ENSG00000170325	ENST00000304538	0
PRDM10	ENSG00000170325	ENST00000423662	0
PRDM10	ENSG00000170325	ENST00000358825	2
ZBTB44	ENSG00000196323	ENST00000530205	2
ZBTB44	ENSG00000196323	ENST00000357899	3
ZBTB44	ENSG00000196323	ENST00000397753	3
ZBTB44	ENSG00000196323	ENST00000525842	3
ZNF384	ENSG00000126746	ENST00000396795	0
ZNF384	ENSG00000126746	ENST00000361959	1
ZNF384	ENSG00000126746	ENST00000319770	1
ZNF384	ENSG00000126746	ENST00000396799	1
ZNF705A	ENSG00000196946	ENST00000402465	4
ZNF705A	ENSG00000196946	ENST00000396570	6
ZNF705A	ENSG00000196946	ENST00000359286	3
AEBP2	ENSG00000139154	ENST00000398864	3
AEBP2	ENSG00000139154	ENST00000266508	3
AEBP2	ENSG00000139154	ENST00000360995	2
VDR	ENSG00000111424	ENST00000550314	2
VDR	ENSG00000111424	ENST00000546653	2
VDR	ENSG00000111424	ENST00000549336	2
VDR	ENSG00000111424	ENST00000229022	2
VDR	ENSG00000111424	ENST00000548664	2
VDR	ENSG00000111424	ENST00000395324	12
ZNF641	ENSG00000167528	ENST00000550342	3
ZNF641	ENSG00000167528	ENST00000544117	4
ZNF641	ENSG00000167528	ENST00000548932	4
ZNF641	ENSG00000167528	ENST00000301042	4
ZNF641	ENSG00000167528	ENST00000448928	3
ZNF641	ENSG00000167528	ENST00000550181	1
KMT2D	ENSG00000167548	ENST00000301067	1
KMT2D	ENSG00000167548	ENST00000547610	0
NR4A1	ENSG00000123358	ENST00000548977	2
NR4A1	ENSG00000123358	ENST00000546842	3
NR4A1	ENSG00000123358	ENST00000553200	2
NR4A1	ENSG00000123358	ENST00000545748	3
NR4A1	ENSG00000123358	ENST00000550082	2
NR4A1	ENSG00000123358	ENST00000243050	2
ZNF740	ENSG00000139651	ENST00000416904	5
RARG	ENSG00000172819	ENST00000338561	3
RARG	ENSG00000172819	ENST00000543726	3
RARG	ENSG00000172819	ENST00000327550	1
RARG	ENSG00000172819	ENST00000546717	1
RARG	ENSG00000172819	ENST00000425354	1
RARG	ENSG00000172819	ENST00000551158	3
RARG	ENSG00000172819	ENST00000550362	2
SP7	ENSG00000170374	ENST00000303846	1
SP7	ENSG00000170374	ENST00000536324	6
SP1	ENSG00000185591	ENST00000327443	0
SP1	ENSG00000185591	ENST00000426431	0
SP1	ENSG00000185591	ENST00000548560	6
IKZF4	ENSG00000123411	ENST00000262032	3
IKZF4	ENSG00000123411	ENST00000552689	2
IKZF4	ENSG00000123411	ENST00000431367	0
IKZF4	ENSG00000123411	ENST00000547167	0
ZBTB39	ENSG00000166860	ENST00000300101	0
GLI1	ENSG00000111087	ENST00000532291	5
GLI1	ENSG00000111087	ENST00000228682	5
GLI1	ENSG00000111087	ENST00000546141	5
GLI1	ENSG00000111087	ENST00000528432	7
GLI1	ENSG00000111087	ENST00000528467	3
THAP2	ENSG00000173451	ENST00000308086	3
NR2C1	ENSG00000120798	ENST00000547469	6
NR2C1	ENSG00000120798	ENST00000330677	4
NR2C1	ENSG00000120798	ENST00000393101	3
NR2C1	ENSG00000120798	ENST00000333003	2
NR1H4	ENSG00000012504	ENST00000548884	1
NR1H4	ENSG00000012504	ENST00000392986	1
NR1H4	ENSG00000012504	ENST00000551379	4
PRDM4	ENSG00000110851	ENST00000547188	7
PRDM4	ENSG00000110851	ENST00000228437	6
ZNF664	ENSG00000179195	ENST00000539644	4
ZNF664	ENSG00000179195	ENST00000392404	2
ZNF664	ENSG00000179195	ENST00000538932	2
ZNF664	ENSG00000179195	ENST00000337815	0
ZNF605	ENSG00000196458	ENST00000360187	0
ZNF26	ENSG00000198393	ENST00000328654	0
ZNF84	ENSG00000198040	ENST00000392319	0
ZNF84	ENSG00000198040	ENST00000543758	0
ZNF84	ENSG00000198040	ENST00000539354	0
ZNF84	ENSG00000198040	ENST00000542874	0
ZNF84	ENSG00000198040	ENST00000438628	0
ZNF84	ENSG00000198040	ENST00000540031	0
ZNF84	ENSG00000198040	ENST00000536123	0
ZNF84	ENSG00000198040	ENST00000327668	0
ZNF84	ENSG00000198040	ENST00000543310	0
ZNF84	ENSG00000198040	ENST00000545299	0
ZNF140	ENSG00000196387	ENST00000355557	0
ZNF140	ENSG00000196387	ENST00000356456	0
ZNF891	ENSG00000214029	ENST00000397313	3
ZNF891	ENSG00000214029	ENST00000537226	6
ZNF10	ENSG00000256223	ENST00000538918	6
ZNF10	ENSG00000256223	ENST00000540609	6
ZNF10	ENSG00000256223	ENST00000248211	6
ZNF10	ENSG00000256223	ENST00000536877	6
ZNF10	ENSG00000256223	ENST00000426665	6
ZNF268	ENSG00000090612	ENST00000416488	6
ZNF268	ENSG00000090612	ENST00000536435	2
ZNF268	ENSG00000090612	ENST00000228289	3
ZNF268	ENSG00000090612	ENST00000541211	3
ZNF268	ENSG00000090612	ENST00000539248	3
ZNF268	ENSG00000090612	ENST00000536899	3
ZNF268	ENSG00000090612	ENST00000541009	3
ZNF268	ENSG00000090612	ENST00000592241	3
KLF5	ENSG00000102554	ENST00000539231	7
KLF5	ENSG00000102554	ENST00000377687	2
KLF12	ENSG00000118922	ENST00000377669	5
KLF12	ENSG00000118922	ENST00000377666	2
ZIC5	ENSG00000139800	ENST00000267294	5
ZIC2	ENSG00000043355	ENST00000376335	1
ZNF219	ENSG00000165804	ENST00000553296	2
ZNF219	ENSG00000165804	ENST00000555270	2
ZNF219	ENSG00000165804	ENST00000360947	1
ZNF219	ENSG00000165804	ENST00000556174	2
ZNF219	ENSG00000165804	ENST00000421093	2
ZNF219	ENSG00000165804	ENST00000555697	5
ZNF219	ENSG00000165804	ENST00000451119	6
SALL2	ENSG00000165821	ENST00000327430	1
INSM2	ENSG00000168348	ENST00000307169	3
ESR2	ENSG00000140009	ENST00000557772	1
ESR2	ENSG00000140009	ENST00000341099	5
ESR2	ENSG00000140009	ENST00000542956	5
ESR2	ENSG00000140009	ENST00000554572	1
ESR2	ENSG00000140009	ENST00000358599	1
ZBTB1	ENSG00000126804	ENST00000553583	1
ZBTB25	ENSG00000089775	ENST00000608382	4
ZBTB1	ENSG00000126804	ENST00000556965	2
ZBTB1	ENSG00000126804	ENST00000554015	2
ZBTB1	ENSG00000126804	ENST00000394712	4
ZBTB25	ENSG00000089775	ENST00000394715	3
ZBTB1	ENSG00000126804	ENST00000555321	4
ZNF410	ENSG00000119725	ENST00000324593	4
ZNF410	ENSG00000119725	ENST00000556659	4
ZNF410	ENSG00000119725	ENST00000555044	4
ZNF410	ENSG00000119725	ENST00000556160	4
ZNF410	ENSG00000119725	ENST00000554797	3
ESRRB	ENSG00000119715	ENST00000509242	6
ESRRB	ENSG00000119715	ENST00000261532	5
BCL11B	ENSG00000127152	ENST00000357195	3
BCL11B	ENSG00000127152	ENST00000345514	3
YY1	ENSG00000100811	ENST00000554371	4
YY1	ENSG00000100811	ENST00000262238	3
ZBTB42	ENSG00000179627	ENST00000555360	2
ZBTB42	ENSG00000179627	ENST00000342537	4
MTA1	ENSG00000182979	ENST00000331320	2
MTA1	ENSG00000182979	ENST00000435036	3
KLF13	ENSG00000169926	ENST00000307145	4
ZNF770	ENSG00000198146	ENST00000559564	2
ZNF770	ENSG00000198146	ENST00000356321	2
ZSCAN29	ENSG00000140265	ENST00000396976	3
ZSCAN29	ENSG00000140265	ENST00000396972	3
ZSCAN29	ENSG00000140265	ENST00000561661	1
ZNF280D	ENSG00000137871	ENST00000559352	3
ZNF280D	ENSG00000137871	ENST00000267807	4
ZNF280D	ENSG00000137871	ENST00000559237	4
RORA	ENSG00000069667	ENST00000449337	5
RORA	ENSG00000069667	ENST00000309157	0
RORA	ENSG00000069667	ENST00000261523	0
RORA	ENSG00000069667	ENST00000335670	6
THAP10	ENSG00000129028	ENST00000249861	1
BNC1	ENSG00000169594	ENST00000345382	1
ZSCAN2	ENSG00000176371	ENST00000448803	3
ZSCAN2	ENSG00000176371	ENST00000546275	3
ZSCAN2	ENSG00000176371	ENST00000546148	3
ZSCAN2	ENSG00000176371	ENST00000442073	3
ZSCAN2	ENSG00000176371	ENST00000334141	3
ZSCAN2	ENSG00000176371	ENST00000502939	3
ZSCAN2	ENSG00000176371	ENST00000379358	3
ZNF592	ENSG00000166716	ENST00000560079	2
ZNF592	ENSG00000166716	ENST00000299927	2
ZNF710	ENSG00000140548	ENST00000268154	5
ZNF710	ENSG00000140548	ENST00000559419	1
ZNF774	ENSG00000196391	ENST00000354377	6
ZNF774	ENSG00000196391	ENST00000558586	15
NR2F2	ENSG00000185551	ENST00000421109	3
NR2F2	ENSG00000185551	ENST00000394166	2
NR2F2	ENSG00000185551	ENST00000559679	2
NR2F2	ENSG00000185551	ENST00000394171	2
NR2F2	ENSG00000185551	ENST00000453270	1
E4F1	ENSG00000167967	ENST00000301727	0
ZSCAN10	ENSG00000130182	ENST00000252463	4
ZSCAN10	ENSG00000130182	ENST00000576483	4
ZSCAN10	ENSG00000130182	ENST00000576985	4
ZNF205	ENSG00000122386	ENST00000382192	0
ZNF205	ENSG00000122386	ENST00000219091	0
ZNF205	ENSG00000122386	ENST00000444510	0
ZNF205	ENSG00000122386	ENST00000414351	0
ZNF213	ENSG00000085644	ENST00000573771	2
ZNF213	ENSG00000085644	ENST00000574902	1
ZNF213	ENSG00000085644	ENST00000396878	1
ZNF213	ENSG00000085644	ENST00000576416	1
ZNF213	ENSG00000085644	ENST00000416391	1
ZNF200	ENSG00000010539	ENST00000575948	1
ZNF200	ENSG00000010539	ENST00000431561	1
ZNF200	ENSG00000010539	ENST00000396870	1
ZNF200	ENSG00000010539	ENST00000396868	3
ZNF200	ENSG00000010539	ENST00000414144	3
ZNF200	ENSG00000010539	ENST00000396871	3
ZNF200	ENSG00000010539	ENST00000575617	4
ZNF263	ENSG00000006194	ENST00000219069	2
ZNF75A	ENSG00000162086	ENST00000574298	7
ZNF75A	ENSG00000162086	ENST00000572999	9
ZSCAN32	ENSG00000140987	ENST00000575350	1
ZSCAN32	ENSG00000140987	ENST00000396846	3
ZSCAN32	ENSG00000140987	ENST00000573327	7
ZSCAN32	ENSG00000140987	ENST00000304926	5
ZSCAN32	ENSG00000140987	ENST00000396852	5
ZNF174	ENSG00000103343	ENST00000575752	7
ZNF174	ENSG00000103343	ENST00000344823	7
ZNF174	ENSG00000103343	ENST00000268655	7
ZNF597	ENSG00000167981	ENST00000301744	6
GLIS2	ENSG00000126603	ENST00000262366	1
GLIS2	ENSG00000126603	ENST00000433375	4
ZNF500	ENSG00000103199	ENST00000588602	2
ZNF500	ENSG00000103199	ENST00000219478	4
ZNF500	ENSG00000103199	ENST00000585977	3
ZKSCAN2	ENSG00000155592	ENST00000328086	10
MAZ	ENSG00000103495	ENST00000322945	0
MAZ	ENSG00000103495	ENST00000219782	1
ZNF48	ENSG00000180035	ENST00000528032	0
ZNF48	ENSG00000180035	ENST00000524644	4
ZNF48	ENSG00000180035	ENST00000320159	2
ZNF771	ENSG00000179965	ENST00000319296	1
ZNF771	ENSG00000179965	ENST00000434417	0
ZNF768	ENSG00000169957	ENST00000380412	5
ZNF764	ENSG00000169951	ENST00000252797	3
ZNF764	ENSG00000169951	ENST00000395091	2
ZNF785	ENSG00000197162	ENST00000470110	1
ZNF785	ENSG00000197162	ENST00000395216	1
ZNF689	ENSG00000156853	ENST00000287461	0
ZNF629	ENSG00000102870	ENST00000262525	1
ZNF668	ENSG00000167394	ENST00000426488	0
ZNF668	ENSG00000167394	ENST00000539836	0
ZNF668	ENSG00000167394	ENST00000535577	0
ZNF668	ENSG00000167394	ENST00000417935	2
ZNF668	ENSG00000167394	ENST00000538906	0
ZNF668	ENSG00000167394	ENST00000300849	3
ZNF646	ENSG00000167395	ENST00000300850	2
ZNF646	ENSG00000167395	ENST00000564189	2
ZNF646	ENSG00000167395	ENST00000428260	2
ZNF646	ENSG00000167395	ENST00000394979	2
KAT8	ENSG00000103510	ENST00000543774	3
KAT8	ENSG00000103510	ENST00000448516	5
ZNF267	ENSG00000185947	ENST00000300870	0
ZNF423	ENSG00000102935	ENST00000561648	2
ZNF423	ENSG00000102935	ENST00000262383	3
ZNF423	ENSG00000102935	ENST00000561874	3
SALL1	ENSG00000103449	ENST00000440970	6
SALL1	ENSG00000103449	ENST00000541611	3
SALL1	ENSG00000103449	ENST00000251020	4
ZNF319	ENSG00000166188	ENST00000299237	0
ZNF319	ENSG00000166188	ENST00000562909	1
CTCF	ENSG00000102974	ENST00000264010	0
THAP11	ENSG00000168286	ENST00000303596	1
ZFP90	ENSG00000184939	ENST00000576305	8
ZFP90	ENSG00000184939	ENST00000571382	9
ZFP90	ENSG00000184939	ENST00000570495	3
ZFP90	ENSG00000184939	ENST00000563169	3
ZFP90	ENSG00000184939	ENST00000562156	4
ZFP90	ENSG00000184939	ENST00000398253	5
ZNF23	ENSG00000167377	ENST00000393539	2
ZNF23	ENSG00000167377	ENST00000428724	2
ZNF23	ENSG00000167377	ENST00000357254	1
ZNF23	ENSG00000167377	ENST00000567340	0
ZNF19	ENSG00000157429	ENST00000568815	1
ZNF19	ENSG00000157429	ENST00000564230	2
ZNF19	ENSG00000157429	ENST00000288177	2
ZNF19	ENSG00000157429	ENST00000569072	2
ZNF19	ENSG00000157429	ENST00000564225	1
ZNF19	ENSG00000157429	ENST00000566202	3
ZFP1	ENSG00000184517	ENST00000570010	6
ZFP1	ENSG00000184517	ENST00000393430	6
ZNF469	ENSG00000225614	ENST00000437464	2
ZFPM1	ENSG00000179588	ENST00000319555	3
SNAI3	ENSG00000185669	ENST00000332281	4
ZNF778	ENSG00000170100	ENST00000564906	4
ZNF778	ENSG00000170100	ENST00000306502	6
ZNF276	ENSG00000158805	ENST00000446326	8
ZNF276	ENSG00000158805	ENST00000289816	5
ZNF276	ENSG00000158805	ENST00000443381	5
HIC1	ENSG00000177374	ENST00000574370	3
HIC1	ENSG00000177374	ENST00000571875	4
HIC1	ENSG00000177374	ENST00000399849	1
HIC1	ENSG00000177374	ENST00000576444	0
HIC1	ENSG00000177374	ENST00000322941	0
ZFP3	ENSG00000180787	ENST00000318833	3
ZNF232	ENSG00000167840	ENST00000575898	7
ZNF232	ENSG00000167840	ENST00000416429	7
ZNF232	ENSG00000167840	ENST00000250076	0
ZNF594	ENSG00000180626	ENST00000399604	5
ZNF594	ENSG00000180626	ENST00000576772	3
ZNF594	ENSG00000180626	ENST00000575779	3
BCL6B	ENSG00000161940	ENST00000293805	2
BCL6B	ENSG00000161940	ENST00000576705	2
BCL6B	ENSG00000161940	ENST00000573503	2
ZBTB4	ENSG00000174282	ENST00000380599	8
ZBTB4	ENSG00000174282	ENST00000311403	4
ZNF18	ENSG00000154957	ENST00000322748	4
ZNF18	ENSG00000154957	ENST00000454073	6
ZNF18	ENSG00000154957	ENST00000580903	6
ZNF18	ENSG00000154957	ENST00000580306	7
ZNF287	ENSG00000141040	ENST00000395824	3
ZNF287	ENSG00000141040	ENST00000448349	3
ZNF287	ENSG00000141040	ENST00000395825	3
ZNF624	ENSG00000197566	ENST00000423860	1
ZNF624	ENSG00000197566	ENST00000311331	1
ZNF624	ENSG00000197566	ENST00000583766	1
ZNF286B	ENSG00000249459	ENST00000545289	12
IKZF3	ENSG00000161405	ENST00000351680	3
IKZF3	ENSG00000161405	ENST00000439016	3
IKZF3	ENSG00000161405	ENST00000346872	3
THRA	ENSG00000126351	ENST00000577288	4
THRA	ENSG00000126351	ENST00000585047	2
THRA	ENSG00000126351	ENST00000578218	2
THRA	ENSG00000126351	ENST00000584985	3
THRA	ENSG00000126351	ENST00000450525	3
THRA	ENSG00000126351	ENST00000546243	2
THRA	ENSG00000126351	ENST00000577486	0
NR1D1	ENSG00000126368	ENST00000246672	2
RARA	ENSG00000131759	ENST00000577646	1
RARA	ENSG00000131759	ENST00000254066	1
RARA	ENSG00000131759	ENST00000394089	1
RARA	ENSG00000131759	ENST00000394081	0
SP6	ENSG00000189120	ENST00000536300	1
SP6	ENSG00000189120	ENST00000342234	7
SP2	ENSG00000167182	ENST00000376741	2
ZNF652	ENSG00000198740	ENST00000430262	2
ZNF652	ENSG00000198740	ENST00000362063	2
KAT7	ENSG00000136504	ENST00000259021	1
KAT7	ENSG00000136504	ENST00000503935	2
VEZF1	ENSG00000136451	ENST00000581208	5
ZBTB14	ENSG00000198081	ENST00000578327	0
ZBTB14	ENSG00000198081	ENST00000582388	2
ZBTB14	ENSG00000198081	ENST00000357006	3
ZBTB14	ENSG00000198081	ENST00000400143	5
ZBTB14	ENSG00000198081	ENST00000582135	3
ZNF519	ENSG00000175322	ENST00000590202	7
GATA6	ENSG00000141448	ENST00000269216	8
GATA6	ENSG00000141448	ENST00000581694	1
ZNF521	ENSG00000198795	ENST00000577461	8
ZNF521	ENSG00000198795	ENST00000580488	3
ZNF521	ENSG00000198795	ENST00000577801	2
ZNF521	ENSG00000198795	ENST00000361524	2
ZNF521	ENSG00000198795	ENST00000538137	2
ZNF397	ENSG00000186812	ENST00000601719	4
ZNF397	ENSG00000186812	ENST00000591206	4
ZNF397	ENSG00000186812	ENST00000261333	4
ZNF397	ENSG00000186812	ENST00000585800	4
ZSCAN30	ENSG00000186814	ENST00000592598	4
ZSCAN30	ENSG00000186814	ENST00000589178	3
ZSCAN30	ENSG00000186814	ENST00000333206	3
ZSCAN30	ENSG00000186814	ENST00000592211	3
ZSCAN30	ENSG00000186814	ENST00000420878	3
ZNF24	ENSG00000172466	ENST00000589881	4
ZNF24	ENSG00000172466	ENST00000593130	3
ZNF24	ENSG00000172466	ENST00000589539	3
ZNF24	ENSG00000172466	ENST00000261332	3
ZNF24	ENSG00000172466	ENST00000590140	2
ZNF396	ENSG00000186496	ENST00000587422	6
ZNF396	ENSG00000186496	ENST00000306346	6
ZBTB7C	ENSG00000184828	ENST00000332053	6
ZBTB7C	ENSG00000184828	ENST00000535628	5
ZBTB7C	ENSG00000184828	ENST00000590437	3
ZBTB7C	ENSG00000184828	ENST00000588982	3
ZBTB7C	ENSG00000184828	ENST00000586047	8
ZBTB7C	ENSG00000184828	ENST00000585404	8
ZBTB7C	ENSG00000184828	ENST00000588566	3
ZBTB7C	ENSG00000184828	ENST00000588053	3
ZBTB7C	ENSG00000184828	ENST00000591405	3
ZBTB7C	ENSG00000184828	ENST00000590178	3
ZBTB7C	ENSG00000184828	ENST00000589194	3
ZBTB7C	ENSG00000184828	ENST00000590800	7
ZBTB7C	ENSG00000184828	ENST00000588149	5
MBD1	ENSG00000141644	ENST00000588937	1
MBD1	ENSG00000141644	ENST00000585595	2
MBD1	ENSG00000141644	ENST00000585672	3
MBD1	ENSG00000141644	ENST00000457839	3
MBD1	ENSG00000141644	ENST00000353909	3
MBD1	ENSG00000141644	ENST00000398493	3
MBD1	ENSG00000141644	ENST00000590208	6
MBD1	ENSG00000141644	ENST00000587605	6
MBD1	ENSG00000141644	ENST00000591416	6
MBD1	ENSG00000141644	ENST00000382948	6
CXXC1	ENSG00000154832	ENST00000586837	7
CXXC1	ENSG00000154832	ENST00000412036	7
CXXC1	ENSG00000154832	ENST00000285106	4
ZNF532	ENSG00000074657	ENST00000336078	3
ZNF532	ENSG00000074657	ENST00000591083	0
ZNF532	ENSG00000074657	ENST00000588601	3
ZNF532	ENSG00000074657	ENST00000590285	3
ZNF532	ENSG00000074657	ENST00000586085	3
ZNF532	ENSG00000074657	ENST00000589288	3
ZNF532	ENSG00000074657	ENST00000591230	1
ZNF532	ENSG00000074657	ENST00000588543	1
ZNF532	ENSG00000074657	ENST00000590287	1
ZNF532	ENSG00000074657	ENST00000591808	2
ZNF532	ENSG00000074657	ENST00000592452	1
ZNF532	ENSG00000074657	ENST00000588456	1
ZNF532	ENSG00000074657	ENST00000589481	1
ZNF532	ENSG00000074657	ENST00000591049	1
ZNF407	ENSG00000215421	ENST00000582337	4
ZNF407	ENSG00000215421	ENST00000309902	5
ZNF407	ENSG00000215421	ENST00000577538	5
ZNF516	ENSG00000101493	ENST00000532857	2
ZNF516	ENSG00000101493	ENST00000443185	4
ZNF236	ENSG00000130856	ENST00000253159	4
SALL3	ENSG00000256463	ENST00000537592	3
ADNP2	ENSG00000101544	ENST00000262198	1
ADNP2	ENSG00000101544	ENST00000559951	3
KLF16	ENSG00000129911	ENST00000250916	3
ZNF554	ENSG00000172006	ENST00000317243	2
ZNF555	ENSG00000186300	ENST00000334241	2
ZNF556	ENSG00000172000	ENST00000307635	5
ZNF57	ENSG00000171970	ENST00000306908	13
ZNF77	ENSG00000175691	ENST00000314531	6
ZBTB7A	ENSG00000178951	ENST00000601588	0
ZBTB7A	ENSG00000178951	ENST00000322357	2
ZNF557	ENSG00000130544	ENST00000252840	2
ZNF557	ENSG00000130544	ENST00000414706	2
ZNF557	ENSG00000130544	ENST00000439035	1
ZNF358	ENSG00000198816	ENST00000596712	3
ZNF358	ENSG00000198816	ENST00000597229	3
ZNF358	ENSG00000198816	ENST00000394341	7
ZNF414	ENSG00000133250	ENST00000255616	8
ZNF414	ENSG00000133250	ENST00000393927	8
ZNF558	ENSG00000167785	ENST00000444186	3
ZNF558	ENSG00000167785	ENST00000301475	2
ZNF558	ENSG00000167785	ENST00000601372	5
ZNF317	ENSG00000130803	ENST00000247956	3
ZNF317	ENSG00000130803	ENST00000360385	3
ZNF699	ENSG00000196110	ENST00000308650	6
ZNF699	ENSG00000196110	ENST00000591998	1
ZNF559	ENSG00000188321	ENST00000603380	7
ZNF559	ENSG00000188321	ENST00000538743	7
ZNF559	ENSG00000188321	ENST00000592298	7
ZNF559	ENSG00000188321	ENST00000393883	7
ZNF177	ENSG00000188629	ENST00000602738	8
ZNF177	ENSG00000188629	ENST00000602856	10
ZNF177	ENSG00000188629	ENST00000343499	5
ZNF177	ENSG00000188629	ENST00000592912	4
ZNF177	ENSG00000188629	ENST00000589262	2
ZNF177	ENSG00000188629	ENST00000434737	4
ZNF266	ENSG00000174652	ENST00000591213	4
ZNF266	ENSG00000174652	ENST00000592904	13
ZNF266	ENSG00000174652	ENST00000590306	7
ZNF266	ENSG00000174652	ENST00000588933	5
ZNF266	ENSG00000174652	ENST00000592292	5
ZNF266	ENSG00000174652	ENST00000588221	5
ZNF266	ENSG00000174652	ENST00000361451	6
ZNF560	ENSG00000198028	ENST00000301480	2
ZNF426	ENSG00000130818	ENST00000535489	6
ZNF426	ENSG00000130818	ENST00000253115	3
ZNF121	ENSG00000197961	ENST00000591447	5
ZNF121	ENSG00000197961	ENST00000586602	2
ZNF561	ENSG00000171469	ENST00000354661	6
ZNF561	ENSG00000171469	ENST00000435550	6
ZNF561	ENSG00000171469	ENST00000421525	6
ZNF561	ENSG00000171469	ENST00000302851	2
ZNF562	ENSG00000171466	ENST00000453372	7
ZNF562	ENSG00000171466	ENST00000585350	7
ZNF562	ENSG00000171466	ENST00000293648	7
ZNF562	ENSG00000171466	ENST00000537617	7
ZNF562	ENSG00000171466	ENST00000541032	7
ZNF562	ENSG00000171466	ENST00000448622	7
ZNF812	ENSG00000224689	ENST00000585964	4
ZNF846	ENSG00000196605	ENST00000397902	6
ZNF846	ENSG00000196605	ENST00000589412	1
ZNF846	ENSG00000196605	ENST00000592587	3
DNMT1	ENSG00000130816	ENST00000540357	1
DNMT1	ENSG00000130816	ENST00000340748	1
ZGLP1	ENSG00000220201	ENST00000403903	3
ZNF653	ENSG00000161914	ENST00000293771	3
ZNF627	ENSG00000198551	ENST00000361113	2
ZNF823	ENSG00000197933	ENST00000341191	6
ZNF441	ENSG00000197044	ENST00000454339	0
ZNF491	ENSG00000177599	ENST00000323169	5
ZNF491	ENSG00000177599	ENST00000450087	4
ZNF440	ENSG00000171295	ENST00000304060	2
ZNF439	ENSG00000171291	ENST00000304030	3
ZNF69	ENSG00000198429	ENST00000429654	3
ZNF69	ENSG00000198429	ENST00000340180	4
ZNF763	ENSG00000197054	ENST00000538752	5
ZNF763	ENSG00000197054	ENST00000545530	3
ZNF763	ENSG00000197054	ENST00000358987	3
ZNF433	ENSG00000197647	ENST00000547560	1
ZNF433	ENSG00000197647	ENST00000552904	1
ZNF433	ENSG00000197647	ENST00000419886	1
ZNF433	ENSG00000197647	ENST00000344980	1
ZNF878	ENSG00000257446	ENST00000602107	2
ZNF844	ENSG00000223547	ENST00000439326	4
ZNF20	ENSG00000132010	ENST00000334213	1
ZNF136	ENSG00000196646	ENST00000343979	1
ZNF136	ENSG00000196646	ENST00000398616	1
ZNF44	ENSG00000197857	ENST00000426973	1
ZNF44	ENSG00000197857	ENST00000355684	2
ZNF563	ENSG00000188868	ENST00000293725	3
ZNF563	ENSG00000188868	ENST00000595977	4
ZNF442	ENSG00000198342	ENST00000242804	4
ZNF799	ENSG00000196466	ENST00000430385	1
ZNF443	ENSG00000180855	ENST00000301547	10
ZNF709	ENSG00000242852	ENST00000397732	2
ZNF564	ENSG00000249709	ENST00000339282	2
ZNF490	ENSG00000188033	ENST00000311437	2
ZNF791	ENSG00000173875	ENST00000343325	2
ZNF791	ENSG00000173875	ENST00000458122	2
ZNF791	ENSG00000173875	ENST00000540038	2
KLF1	ENSG00000105610	ENST00000264834	3
ZNF333	ENSG00000160961	ENST00000536363	7
ZNF333	ENSG00000160961	ENST00000292530	11
WIZ	ENSG00000011451	ENST00000545156	0
WIZ	ENSG00000011451	ENST00000596159	2
WIZ	ENSG00000011451	ENST00000389282	2
KLF2	ENSG00000127528	ENST00000248071	4
NR2F6	ENSG00000160113	ENST00000291442	6
GATAD2A	ENSG00000167491	ENST00000494516	1
GATAD2A	ENSG00000167491	ENST00000360315	1
GATAD2A	ENSG00000167491	ENST00000537887	1
GATAD2A	ENSG00000167491	ENST00000417582	0
GATAD2A	ENSG00000167491	ENST00000457895	2
GATAD2A	ENSG00000167491	ENST00000432704	2
GATAD2A	ENSG00000167491	ENST00000429242	0
GATAD2A	ENSG00000167491	ENST00000358713	1
GATAD2A	ENSG00000167491	ENST00000444839	1
GATAD2A	ENSG00000167491	ENST00000429563	4
ZNF101	ENSG00000181896	ENST00000592502	1
ZNF14	ENSG00000105708	ENST00000344099	1
ZNF506	ENSG00000081665	ENST00000443905	4
ZNF253	ENSG00000256771	ENST00000589717	9
ZNF93	ENSG00000184635	ENST00000343769	2
ZNF682	ENSG00000197124	ENST00000358523	6
ZNF682	ENSG00000197124	ENST00000397162	6
ZNF682	ENSG00000197124	ENST00000601100	6
ZNF682	ENSG00000197124	ENST00000397165	5
ZNF90	ENSG00000213988	ENST00000418063	4
ZNF737	ENSG00000237440	ENST00000427401	4
ZNF626	ENSG00000188171	ENST00000601440	9
ZNF626	ENSG00000188171	ENST00000291750	9
ZNF85	ENSG00000105750	ENST00000328178	0
ZNF430	ENSG00000118620	ENST00000261560	3
ZNF714	ENSG00000160352	ENST00000596143	1
ZNF431	ENSG00000196705	ENST00000311048	3
ZNF708	ENSG00000182141	ENST00000356929	8
ZNF493	ENSG00000196268	ENST00000355504	6
ZNF100	ENSG00000197020	ENST00000358296	4
ZNF43	ENSG00000198521	ENST00000354959	5
ZNF257	ENSG00000197134	ENST00000594947	7
ZNF676	ENSG00000196109	ENST00000397121	5
ZNF729	ENSG00000196350	ENST00000357491	9
ZNF98	ENSG00000197360	ENST00000357774	7
ZNF492	ENSG00000229676	ENST00000456783	13
ZNF99	ENSG00000213973	ENST00000397104	4
ZNF730	ENSG00000183850	ENST00000597761	10
ZNF91	ENSG00000167232	ENST00000397082	1
ZNF91	ENSG00000167232	ENST00000300619	1
ZNF675	ENSG00000197372	ENST00000359788	12
ZNF681	ENSG00000196172	ENST00000395385	4
ZNF681	ENSG00000196172	ENST00000402377	4
ZNF726	ENSG00000213967	ENST00000525354	5
ZNF726	ENSG00000213967	ENST00000531821	5
ZNF726	ENSG00000213967	ENST00000322487	5
ZNF254	ENSG00000213096	ENST00000342944	7
ZNF254	ENSG00000213096	ENST00000357002	1
ZNF536	ENSG00000198597	ENST00000585628	1
ZNF536	ENSG00000198597	ENST00000591488	2
ZNF536	ENSG00000198597	ENST00000355537	0
ZNF507	ENSG00000168813	ENST00000311921	5
ZNF507	ENSG00000168813	ENST00000355898	4
ZNF302	ENSG00000089335	ENST00000457781	6
ZNF302	ENSG00000089335	ENST00000505163	6
ZNF302	ENSG00000089335	ENST00000423823	6
ZNF181	ENSG00000197841	ENST00000599244	3
ZNF181	ENSG00000197841	ENST00000392232	3
ZNF181	ENSG00000197841	ENST00000595708	2
ZNF181	ENSG00000197841	ENST00000459757	4
ZNF181	ENSG00000197841	ENST00000492450	3
ZNF599	ENSG00000153896	ENST00000329285	4
ZNF599	ENSG00000153896	ENST00000587354	4
ZNF30	ENSG00000168661	ENST00000303586	4
ZNF30	ENSG00000168661	ENST00000601540	4
ZNF30	ENSG00000168661	ENST00000601957	4
ZNF30	ENSG00000168661	ENST00000601142	4
ZNF30	ENSG00000168661	ENST00000426813	4
ZNF792	ENSG00000180884	ENST00000605484	3
ZNF792	ENSG00000180884	ENST00000404801	2
ZBTB32	ENSG00000011590	ENST00000392197	3
ZBTB32	ENSG00000011590	ENST00000262630	3
THAP8	ENSG00000161277	ENST00000538849	2
THAP8	ENSG00000161277	ENST00000292894	1
OVOL3	ENSG00000105261	ENST00000585332	2
OVOL3	ENSG00000105261	ENST00000262637	2
ZNF565	ENSG00000196357	ENST00000585994	5
ZNF146	ENSG00000167635	ENST00000456324	2
ZNF565	ENSG00000196357	ENST00000304116	2
ZNF565	ENSG00000196357	ENST00000392173	1
ZNF146	ENSG00000167635	ENST00000443387	2
ZFP14	ENSG00000142065	ENST00000270001	7
ZFP82	ENSG00000181007	ENST00000392161	4
ZNF566	ENSG00000186017	ENST00000434377	5
ZNF566	ENSG00000186017	ENST00000424129	5
ZNF566	ENSG00000186017	ENST00000452939	5
ZNF566	ENSG00000186017	ENST00000427002	5
ZNF566	ENSG00000186017	ENST00000454319	4
ZNF260	ENSG00000254004	ENST00000593142	1
ZNF260	ENSG00000254004	ENST00000592282	4
ZNF260	ENSG00000254004	ENST00000523638	4
ZNF529	ENSG00000186020	ENST00000591340	3
ZNF529	ENSG00000186020	ENST00000334116	3
ZNF529	ENSG00000186020	ENST00000585983	3
ZNF382	ENSG00000161298	ENST00000460670	2
ZNF382	ENSG00000161298	ENST00000292928	2
ZNF382	ENSG00000161298	ENST00000439428	2
ZNF382	ENSG00000161298	ENST00000435416	0
ZNF461	ENSG00000197808	ENST00000588268	1
ZNF567	ENSG00000189042	ENST00000536254	6
ZNF567	ENSG00000189042	ENST00000360729	3
ZNF567	ENSG00000189042	ENST00000585696	6
ZNF567	ENSG00000189042	ENST00000392163	3
ZNF790	ENSG00000197863	ENST00000527645	6
ZNF790	ENSG00000197863	ENST00000525288	6
ZNF790	ENSG00000197863	ENST00000356725	1
ZNF790	ENSG00000197863	ENST00000528994	0
ZNF345	ENSG00000251247	ENST00000589046	1
ZNF790	ENSG00000197863	ENST00000586323	0
ZNF345	ENSG00000251247	ENST00000532141	0
ZNF345	ENSG00000251247	ENST00000420450	0
ZNF345	ENSG00000251247	ENST00000529555	0
ZNF345	ENSG00000251247	ENST00000331800	2
ZNF345	ENSG00000251247	ENST00000586646	2
ZNF345	ENSG00000251247	ENST00000585396	2
ZNF829	ENSG00000185869	ENST00000520965	4
ZNF829	ENSG00000185869	ENST00000391711	3
ZNF568	ENSG00000198453	ENST00000587130	5
ZNF568	ENSG00000198453	ENST00000415168	5
ZNF568	ENSG00000198453	ENST00000455427	4
ZNF420	ENSG00000197050	ENST00000587029	5
ZNF420	ENSG00000197050	ENST00000589245	3
ZNF420	ENSG00000197050	ENST00000337995	3
ZNF585A	ENSG00000196967	ENST00000392157	1
ZNF585A	ENSG00000196967	ENST00000292841	3
ZNF585A	ENSG00000196967	ENST00000356958	3
ZNF383	ENSG00000188283	ENST00000590503	1
ZNF383	ENSG00000188283	ENST00000589413	1
ZNF383	ENSG00000188283	ENST00000352998	2
ZNF383	ENSG00000188283	ENST00000588371	6
HKR1	ENSG00000181666	ENST00000589801	10
HKR1	ENSG00000181666	ENST00000392153	1
HKR1	ENSG00000181666	ENST00000324411	1
ZNF527	ENSG00000189164	ENST00000436120	4
ZNF569	ENSG00000196437	ENST00000392150	3
ZNF569	ENSG00000196437	ENST00000392149	5
ZNF569	ENSG00000196437	ENST00000316950	5
ZNF570	ENSG00000171827	ENST00000330173	1
ZNF570	ENSG00000171827	ENST00000388801	1
ZNF570	ENSG00000171827	ENST00000589725	0
ZNF793	ENSG00000188227	ENST00000542455	0
ZNF793	ENSG00000188227	ENST00000587143	1
ZNF793	ENSG00000188227	ENST00000586138	2
ZNF793	ENSG00000188227	ENST00000445217	2
ZNF540	ENSG00000171817	ENST00000592533	1
ZNF571	ENSG00000180479	ENST00000593133	1
ZNF571	ENSG00000180479	ENST00000358744	1
ZNF571	ENSG00000180479	ENST00000328550	1
ZNF571	ENSG00000180479	ENST00000451802	1
ZNF540	ENSG00000171817	ENST00000589117	3
ZNF540	ENSG00000171817	ENST00000316433	3
ZNF540	ENSG00000171817	ENST00000586134	3
ZNF540	ENSG00000171817	ENST00000343599	1
ZFP30	ENSG00000120784	ENST00000392144	5
ZFP30	ENSG00000120784	ENST00000591444	5
ZFP30	ENSG00000120784	ENST00000351218	5
ZFP30	ENSG00000120784	ENST00000587809	6
ZFP30	ENSG00000120784	ENST00000588979	7
ZFP30	ENSG00000120784	ENST00000514101	3
ZNF781	ENSG00000196381	ENST00000590008	7
ZNF781	ENSG00000196381	ENST00000358582	6
ZFP30	ENSG00000120784	ENST00000587199	6
ZNF607	ENSG00000198182	ENST00000395835	5
ZNF607	ENSG00000198182	ENST00000355202	3
ZNF573	ENSG00000189144	ENST00000590414	2
ZNF573	ENSG00000189144	ENST00000378445	2
ZNF573	ENSG00000189144	ENST00000536220	2
ZNF573	ENSG00000189144	ENST00000392138	3
ZNF546	ENSG00000187187	ENST00000347077	8
ZNF546	ENSG00000187187	ENST00000595225	6
ZNF780B	ENSG00000128000	ENST00000593605	3
ZNF780B	ENSG00000128000	ENST00000434248	3
ZNF780A	ENSG00000197782	ENST00000594395	4
ZNF780A	ENSG00000197782	ENST00000599972	1
ZNF780A	ENSG00000197782	ENST00000450241	1
ZNF780A	ENSG00000197782	ENST00000414720	1
DMRTC2	ENSG00000142025	ENST00000600017	2
DMRTC2	ENSG00000142025	ENST00000269945	3
DMRTC2	ENSG00000142025	ENST00000596258	3
DMRTC2	ENSG00000142025	ENST00000596660	2
ZNF574	ENSG00000105732	ENST00000222339	1
ZNF574	ENSG00000105732	ENST00000600245	0
ZNF574	ENSG00000105732	ENST00000597391	3
ZNF574	ENSG00000105732	ENST00000359044	5
ZNF526	ENSG00000167625	ENST00000301215	2
ZNF526	ENSG00000167625	ENST00000597945	3
ZNF575	ENSG00000176472	ENST00000598080	2
ZNF575	ENSG00000176472	ENST00000314228	4
ZNF575	ENSG00000176472	ENST00000601282	4
ZNF576	ENSG00000124444	ENST00000391965	3
ZNF576	ENSG00000124444	ENST00000525771	3
ZNF576	ENSG00000124444	ENST00000533118	3
ZNF576	ENSG00000124444	ENST00000528387	3
ZNF576	ENSG00000124444	ENST00000529930	3
ZNF576	ENSG00000124444	ENST00000336564	2
ZNF283	ENSG00000167637	ENST00000324461	5
ZNF283	ENSG00000167637	ENST00000310738	6
ZNF404	ENSG00000176222	ENST00000324394	2
ZNF404	ENSG00000176222	ENST00000587539	2
ZNF45	ENSG00000124459	ENST00000589703	6
ZNF45	ENSG00000124459	ENST00000269973	6
ZNF221	ENSG00000159905	ENST00000591168	8
ZNF221	ENSG00000159905	ENST00000251269	8
ZNF221	ENSG00000159905	ENST00000592350	4
ZNF155	ENSG00000204920	ENST00000590411	6
ZNF155	ENSG00000204920	ENST00000591532	6
ZNF155	ENSG00000204920	ENST00000270014	6
ZNF155	ENSG00000204920	ENST00000590615	6
ZNF155	ENSG00000204920	ENST00000586454	6
ZNF230	ENSG00000159882	ENST00000429154	6
ZNF230	ENSG00000159882	ENST00000585491	9
ZNF222	ENSG00000159885	ENST00000187879	6
ZNF222	ENSG00000159885	ENST00000391960	6
ZNF223	ENSG00000178386	ENST00000434772	4
ZNF284	ENSG00000186026	ENST00000421176	2
ZNF224	ENSG00000267680	ENST00000589680	1
ZNF224	ENSG00000267680	ENST00000336976	1
ZNF224	ENSG00000267680	ENST00000589870	5
ZNF224	ENSG00000267680	ENST00000591511	4
ZNF225	ENSG00000256294	ENST00000589155	2
ZNF225	ENSG00000256294	ENST00000262894	5
ZNF225	ENSG00000256294	ENST00000588926	5
ZNF225	ENSG00000256294	ENST00000590612	5
ZNF226	ENSG00000167380	ENST00000590578	1
ZNF226	ENSG00000167380	ENST00000337433	1
ZNF226	ENSG00000167380	ENST00000586286	1
ZNF226	ENSG00000167380	ENST00000585560	1
ZNF226	ENSG00000167380	ENST00000413984	1
ZNF226	ENSG00000167380	ENST00000588742	1
ZNF226	ENSG00000167380	ENST00000586203	1
ZNF226	ENSG00000167380	ENST00000590467	1
ZNF226	ENSG00000167380	ENST00000588127	1
ZNF226	ENSG00000167380	ENST00000590089	2
ZNF226	ENSG00000167380	ENST00000454662	2
ZNF226	ENSG00000167380	ENST00000590524	5
ZNF227	ENSG00000131115	ENST00000313040	1
ZNF227	ENSG00000131115	ENST00000586048	1
ZNF227	ENSG00000131115	ENST00000391961	0
ZNF233	ENSG00000159915	ENST00000334152	5
ZNF233	ENSG00000159915	ENST00000590668	4
ZNF233	ENSG00000159915	ENST00000391958	4
ZNF235	ENSG00000159917	ENST00000291182	1
ZNF112	ENSG00000062370	ENST00000354340	1
ZNF112	ENSG00000062370	ENST00000337401	1
ZNF112	ENSG00000062370	ENST00000590687	13
ZNF112	ENSG00000062370	ENST00000536500	13
ZNF180	ENSG00000167384	ENST00000221327	9
ZNF296	ENSG00000170684	ENST00000303809	2
ZC3H4	ENSG00000130749	ENST00000253048	1
ZNF541	ENSG00000118156	ENST00000391901	0
ZNF114	ENSG00000178150	ENST00000595607	6
ZNF114	ENSG00000178150	ENST00000600687	8
ZNF114	ENSG00000178150	ENST00000315849	10
ZNF114	ENSG00000178150	ENST00000601320	9
NR1H2	ENSG00000131408	ENST00000600355	0
NR1H2	ENSG00000131408	ENST00000542413	0
NR1H2	ENSG00000131408	ENST00000253727	9
NR1H2	ENSG00000131408	ENST00000597790	9
NR1H2	ENSG00000131408	ENST00000593926	9
NR1H2	ENSG00000131408	ENST00000597157	7
ZNF175	ENSG00000105497	ENST00000262259	6
ZNF577	ENSG00000161551	ENST00000446514	1
ZNF577	ENSG00000161551	ENST00000458390	3
ZNF577	ENSG00000161551	ENST00000420592	3
ZNF577	ENSG00000161551	ENST00000592321	3
ZNF577	ENSG00000161551	ENST00000301399	3
ZNF577	ENSG00000161551	ENST00000419138	3
ZNF577	ENSG00000161551	ENST00000453272	0
ZNF649	ENSG00000198093	ENST00000354957	12
ZNF649	ENSG00000198093	ENST00000595418	12
ZNF613	ENSG00000176024	ENST00000293471	5
ZNF613	ENSG00000176024	ENST00000391794	4
ZNF613	ENSG00000176024	ENST00000599683	4
ZNF613	ENSG00000176024	ENST00000600853	4
ZNF350	ENSG00000256683	ENST00000597788	4
ZNF350	ENSG00000256683	ENST00000593596	5
ZNF350	ENSG00000256683	ENST00000243644	4
ZNF350	ENSG00000256683	ENST00000594929	4
ZNF615	ENSG00000197619	ENST00000602063	2
ZNF615	ENSG00000197619	ENST00000594083	2
ZNF615	ENSG00000197619	ENST00000599631	2
ZNF615	ENSG00000197619	ENST00000598071	2
ZNF615	ENSG00000197619	ENST00000376716	2
ZNF614	ENSG00000142556	ENST00000270649	1
ZNF614	ENSG00000142556	ENST00000597952	1
ZNF432	ENSG00000256087	ENST00000601310	4
ZNF432	ENSG00000256087	ENST00000594154	5
ZNF432	ENSG00000256087	ENST00000598745	5
ZNF432	ENSG00000256087	ENST00000221315	6
ZNF432	ENSG00000256087	ENST00000600368	2
ZNF841	ENSG00000197608	ENST00000359973	4
ZNF841	ENSG00000197608	ENST00000594295	6
ZNF841	ENSG00000197608	ENST00000594440	2
ZNF841	ENSG00000197608	ENST00000389534	2
ZNF616	ENSG00000204611	ENST00000600282	2
ZNF616	ENSG00000204611	ENST00000600228	6
ZNF836	ENSG00000196267	ENST00000596428	1
ZNF836	ENSG00000196267	ENST00000597252	3
ZNF836	ENSG00000196267	ENST00000322146	2
ZNF766	ENSG00000196214	ENST00000439461	3
ZNF766	ENSG00000196214	ENST00000359102	1
ZNF480	ENSG00000198464	ENST00000595962	5
ZNF480	ENSG00000198464	ENST00000335090	4
ZNF610	ENSG00000167554	ENST00000321287	10
ZNF610	ENSG00000167554	ENST00000403906	10
ZNF610	ENSG00000167554	ENST00000601151	10
ZNF610	ENSG00000167554	ENST00000593698	4
ZNF610	ENSG00000167554	ENST00000327920	8
ZNF880	ENSG00000221923	ENST00000344085	6
ZNF880	ENSG00000221923	ENST00000422689	6
ZNF528	ENSG00000167555	ENST00000436397	8
ZNF534	ENSG00000198633	ENST00000433050	5
ZNF578	ENSG00000258405	ENST00000421239	4
ZNF578	ENSG00000258405	ENST00000601120	8
ZNF808	ENSG00000198482	ENST00000359798	5
ZNF808	ENSG00000198482	ENST00000465448	6
ZNF808	ENSG00000198482	ENST00000461779	6
ZNF808	ENSG00000198482	ENST00000461321	9
ZNF701	ENSG00000167562	ENST00000391785	7
ZNF701	ENSG00000167562	ENST00000301093	7
ZNF701	ENSG00000167562	ENST00000593941	7
ZNF83	ENSG00000167766	ENST00000391789	3
ZNF83	ENSG00000167766	ENST00000541777	12
ZNF83	ENSG00000167766	ENST00000597597	9
ZNF83	ENSG00000167766	ENST00000545872	6
ZNF83	ENSG00000167766	ENST00000544146	6
ZNF83	ENSG00000167766	ENST00000594682	8
ZNF611	ENSG00000213020	ENST00000595798	11
ZNF611	ENSG00000213020	ENST00000319783	12
ZNF611	ENSG00000213020	ENST00000453741	10
ZNF611	ENSG00000213020	ENST00000543227	10
ZNF600	ENSG00000189190	ENST00000338230	13
ZNF28	ENSG00000198538	ENST00000360272	3
ZNF28	ENSG00000198538	ENST00000457749	12
ZNF28	ENSG00000198538	ENST00000414252	11
ZNF468	ENSG00000204604	ENST00000595646	12
ZNF468	ENSG00000204604	ENST00000396409	13
ZNF320	ENSG00000182986	ENST00000391781	6
ZNF320	ENSG00000182986	ENST00000597265	17
ZNF320	ENSG00000182986	ENST00000595635	2
ZNF320	ENSG00000182986	ENST00000594741	1
ZNF320	ENSG00000182986	ENST00000597111	1
ZNF320	ENSG00000182986	ENST00000593618	1
ZNF816	ENSG00000180257	ENST00000549216	4
ZNF816	ENSG00000180257	ENST00000434371	6
ZNF816	ENSG00000180257	ENST00000444460	6
ZNF816	ENSG00000180257	ENST00000457013	6
ZNF160	ENSG00000170949	ENST00000599056	3
ZNF160	ENSG00000170949	ENST00000599247	3
ZNF160	ENSG00000170949	ENST00000429604	4
ZNF160	ENSG00000170949	ENST00000599637	4
ZNF415	ENSG00000170954	ENST00000500065	5
ZNF415	ENSG00000170954	ENST00000243643	5
ZNF415	ENSG00000170954	ENST00000448501	5
ZNF415	ENSG00000170954	ENST00000596051	5
ZNF415	ENSG00000170954	ENST00000601110	5
ZNF347	ENSG00000197937	ENST00000599096	4
ZNF347	ENSG00000197937	ENST00000334197	4
ZNF347	ENSG00000197937	ENST00000601469	4
ZNF347	ENSG00000197937	ENST00000452676	4
ZNF665	ENSG00000197497	ENST00000396424	5
ZNF677	ENSG00000197928	ENST00000594517	6
ZNF677	ENSG00000197928	ENST00000598513	5
ZNF677	ENSG00000197928	ENST00000333952	5
ZNF845	ENSG00000213799	ENST00000601857	12
ZNF765	ENSG00000196417	ENST00000396408	13
ZNF813	ENSG00000198346	ENST00000396403	5
ZNF813	ENSG00000198346	ENST00000396421	4
ZNF331	ENSG00000130844	ENST00000253144	20
ZNF331	ENSG00000130844	ENST00000502248	5
ZNF331	ENSG00000130844	ENST00000511593	6
ZNF331	ENSG00000130844	ENST00000449416	8
ZNF331	ENSG00000130844	ENST00000514374	9
ZNF331	ENSG00000130844	ENST00000411977	11
ZNF331	ENSG00000130844	ENST00000511154	12
ZNF331	ENSG00000130844	ENST00000509047	10
ZNF331	ENSG00000130844	ENST00000509585	9
ZNF331	ENSG00000130844	ENST00000513999	6
ZNF331	ENSG00000130844	ENST00000512387	2
ZNF331	ENSG00000130844	ENST00000511567	2
ZNF331	ENSG00000130844	ENST00000514022	2
ZNF331	ENSG00000130844	ENST00000505949	2
ZNF331	ENSG00000130844	ENST00000502616	2
ZNF331	ENSG00000130844	ENST00000504493	2
ZNF331	ENSG00000130844	ENST00000505426	2
ZNF628	ENSG00000197483	ENST00000598519	2
ZNF579	ENSG00000218891	ENST00000325421	4
ZNF579	ENSG00000218891	ENST00000592239	5
FIZ1	ENSG00000179943	ENST00000587414	3
FIZ1	ENSG00000179943	ENST00000221665	6
ZNF524	ENSG00000171443	ENST00000589521	6
ZNF524	ENSG00000171443	ENST00000301073	7
ZNF524	ENSG00000171443	ENST00000591046	5
FIZ1	ENSG00000179943	ENST00000590714	0
ZNF784	ENSG00000179922	ENST00000325351	5
ZNF580	ENSG00000213015	ENST00000592881	2
ZNF581	ENSG00000171425	ENST00000587252	2
ZNF580	ENSG00000213015	ENST00000325333	6
ZNF580	ENSG00000213015	ENST00000590190	4
ZNF581	ENSG00000171425	ENST00000585995	4
ZNF580	ENSG00000213015	ENST00000543039	3
ZNF580	ENSG00000213015	ENST00000592461	3
ZNF581	ENSG00000171425	ENST00000270451	7
ZNF581	ENSG00000171425	ENST00000588537	5
ZNF787	ENSG00000142409	ENST00000586787	9
ZNF787	ENSG00000142409	ENST00000270459	6
ZNF444	ENSG00000167685	ENST00000587467	6
ZNF444	ENSG00000167685	ENST00000588358	5
ZNF444	ENSG00000167685	ENST00000337080	7
ZNF444	ENSG00000167685	ENST00000586123	6
ZNF444	ENSG00000167685	ENST00000592949	6
ZNF444	ENSG00000167685	ENST00000593100	3
ZNF444	ENSG00000167685	ENST00000588203	4
ZNF444	ENSG00000167685	ENST00000591564	5
ZSCAN5B	ENSG00000197213	ENST00000358992	2
ZSCAN5B	ENSG00000197213	ENST00000589938	12
ZSCAN5B	ENSG00000197213	ENST00000587032	12
ZSCAN5B	ENSG00000197213	ENST00000586855	14
ZSCAN5A	ENSG00000131848	ENST00000391713	4
ZSCAN5A	ENSG00000131848	ENST00000588955	4
ZSCAN5A	ENSG00000131848	ENST00000592509	2
ZSCAN5A	ENSG00000131848	ENST00000592679	2
ZSCAN5A	ENSG00000131848	ENST00000588442	2
ZSCAN5A	ENSG00000131848	ENST00000254165	2
ZSCAN5A	ENSG00000131848	ENST00000587340	4
ZNF582	ENSG00000018869	ENST00000589895	5
ZNF582	ENSG00000018869	ENST00000301310	4
ZNF582	ENSG00000018869	ENST00000586929	4
ZNF583	ENSG00000198440	ENST00000537943	9
ZNF583	ENSG00000198440	ENST00000333201	9
ZNF583	ENSG00000198440	ENST00000391778	9
ZNF667	ENSG00000198046	ENST00000342634	4
ZNF667	ENSG00000198046	ENST00000589946	2
ZNF667	ENSG00000198046	ENST00000504904	3
ZNF667	ENSG00000198046	ENST00000292069	3
ZNF667	ENSG00000198046	ENST00000587555	7
ZNF471	ENSG00000196263	ENST00000308031	3
ZNF471	ENSG00000196263	ENST00000591759	4
ZFP28	ENSG00000196867	ENST00000301318	5
ZNF470	ENSG00000197016	ENST00000330619	3
ZNF470	ENSG00000197016	ENST00000391709	3
ZNF71	ENSG00000197951	ENST00000599599	5
ZNF71	ENSG00000197951	ENST00000328070	4
ZNF835	ENSG00000127903	ENST00000537055	4
ZNF835	ENSG00000127903	ENST00000601659	4
PEG3	ENSG00000198300	ENST00000599534	2
PEG3	ENSG00000198300	ENST00000326441	2
PEG3	ENSG00000198300	ENST00000594389	2
PEG3	ENSG00000198300	ENST00000423103	2
ZIM3	ENSG00000141946	ENST00000269834	5
ZNF264	ENSG00000083844	ENST00000263095	5
ZNF264	ENSG00000083844	ENST00000594126	5
ZNF264	ENSG00000083844	ENST00000536056	6
ZNF805	ENSG00000204524	ENST00000535550	6
ZNF805	ENSG00000204524	ENST00000354309	3
ZNF805	ENSG00000204524	ENST00000414468	4
ZNF460	ENSG00000197714	ENST00000360338	2
ZNF543	ENSG00000178229	ENST00000321545	9
ZNF304	ENSG00000131845	ENST00000391705	7
ZNF304	ENSG00000131845	ENST00000282286	4
ZNF547	ENSG00000152433	ENST00000282282	6
ZNF548	ENSG00000188785	ENST00000366197	4
ZNF548	ENSG00000188785	ENST00000336128	4
ZNF17	ENSG00000186272	ENST00000601808	7
ZNF749	ENSG00000186230	ENST00000334181	4
ZNF772	ENSG00000197128	ENST00000356584	4
ZNF772	ENSG00000197128	ENST00000343280	4
ZNF419	ENSG00000105136	ENST00000354197	11
ZNF419	ENSG00000105136	ENST00000442920	12
ZNF419	ENSG00000105136	ENST00000424930	11
ZNF419	ENSG00000105136	ENST00000347466	11
ZNF419	ENSG00000105136	ENST00000415379	11
ZNF419	ENSG00000105136	ENST00000521754	11
ZNF419	ENSG00000105136	ENST00000221735	10
ZNF773	ENSG00000152439	ENST00000598770	14
ZNF773	ENSG00000152439	ENST00000282292	14
ZNF549	ENSG00000121406	ENST00000240719	6
ZNF549	ENSG00000121406	ENST00000376233	6
ZNF550	ENSG00000251369	ENST00000344222	0
ZNF550	ENSG00000251369	ENST00000325134	1
ZNF550	ENSG00000251369	ENST00000457177	2
ZNF416	ENSG00000083817	ENST00000196489	2
ZIK1	ENSG00000171649	ENST00000597850	2
ZNF530	ENSG00000183647	ENST00000332854	1
ZNF134	ENSG00000213762	ENST00000396161	5
ZNF134	ENSG00000213762	ENST00000600883	5
ZNF211	ENSG00000121417	ENST00000420680	8
ZNF211	ENSG00000121417	ENST00000347302	12
ZNF211	ENSG00000121417	ENST00000254182	11
ZNF211	ENSG00000121417	ENST00000391703	11
ZNF211	ENSG00000121417	ENST00000544273	11
ZNF211	ENSG00000121417	ENST00000240731	11
ZSCAN4	ENSG00000180532	ENST00000318203	6
ZNF551	ENSG00000204519	ENST00000282296	4
ZNF551	ENSG00000204519	ENST00000356715	5
ZNF154	ENSG00000179909	ENST00000512439	2
ZNF154	ENSG00000179909	ENST00000426889	2
ZNF671	ENSG00000083814	ENST00000335820	1
ZNF671	ENSG00000083814	ENST00000317398	1
ZNF776	ENSG00000152443	ENST00000317178	3
ZNF586	ENSG00000083828	ENST00000391702	6
ZNF586	ENSG00000083828	ENST00000396154	6
ZNF586	ENSG00000083828	ENST00000396150	6
ZNF552	ENSG00000178935	ENST00000391701	1
ZNF587	ENSG00000198466	ENST00000339656	4
ZNF814	ENSG00000204514	ENST00000435989	2
ZNF417	ENSG00000173480	ENST00000312026	3
ZNF417	ENSG00000173480	ENST00000536263	3
ZNF418	ENSG00000196724	ENST00000595830	2
ZNF418	ENSG00000196724	ENST00000593296	4
ZNF418	ENSG00000196724	ENST00000396147	0
ZNF418	ENSG00000196724	ENST00000595569	0
ZNF418	ENSG00000196724	ENST00000601593	0
ZNF256	ENSG00000152454	ENST00000282308	2
ZNF256	ENSG00000152454	ENST00000598928	2
ZNF606	ENSG00000166704	ENST00000536132	7
ZNF606	ENSG00000166704	ENST00000551380	7
ZNF606	ENSG00000166704	ENST00000341164	6
ZSCAN1	ENSG00000152467	ENST00000391700	6
ZSCAN1	ENSG00000152467	ENST00000282326	6
ZSCAN1	ENSG00000152467	ENST00000601162	6
ZNF135	ENSG00000176293	ENST00000439855	1
ZNF135	ENSG00000176293	ENST00000313434	1
ZNF135	ENSG00000176293	ENST00000511556	2
ZNF135	ENSG00000176293	ENST00000506786	2
ZNF329	ENSG00000181894	ENST00000358067	5
ZNF329	ENSG00000181894	ENST00000598312	3
ZNF329	ENSG00000181894	ENST00000601887	8
ZNF274	ENSG00000171606	ENST00000326804	3
ZNF274	ENSG00000171606	ENST00000597528	1
ZNF274	ENSG00000171606	ENST00000594839	1
ZNF544	ENSG00000198131	ENST00000269829	4
ZNF544	ENSG00000198131	ENST00000333581	12
ZNF544	ENSG00000198131	ENST00000415203	6
ZSCAN22	ENSG00000182318	ENST00000329665	2
ZNF497	ENSG00000174586	ENST00000311044	4
ZNF497	ENSG00000174586	ENST00000425453	3
ZNF837	ENSG00000152475	ENST00000427624	10
ZNF837	ENSG00000152475	ENST00000597582	10
ZNF584	ENSG00000171574	ENST00000306910	4
ZNF132	ENSG00000131849	ENST00000254166	5
ZNF324B	ENSG00000249471	ENST00000336614	4
ZNF324B	ENSG00000249471	ENST00000545523	4
ZNF324B	ENSG00000249471	ENST00000599194	4
ZNF324B	ENSG00000249471	ENST00000598244	4
ZNF324B	ENSG00000249471	ENST00000391696	4
ZNF324	ENSG00000083812	ENST00000536459	2
ZNF324	ENSG00000083812	ENST00000196482	1
ZNF324	ENSG00000083812	ENST00000593925	1
ZNF446	ENSG00000083838	ENST00000600013	5
ZNF446	ENSG00000083838	ENST00000594369	5
ZBTB45	ENSG00000119574	ENST00000354590	1
ZBTB45	ENSG00000119574	ENST00000596739	1
ZBTB45	ENSG00000119574	ENST00000600990	0
ZBTB45	ENSG00000119574	ENST00000594051	1
ZBTB45	ENSG00000119574	ENST00000600130	3
MZF1	ENSG00000099326	ENST00000596039	4
MZF1	ENSG00000099326	ENST00000215057	4
SCRT2	ENSG00000215397	ENST00000246104	5
ZNF343	ENSG00000088876	ENST00000421216	2
ZNF343	ENSG00000088876	ENST00000278772	1
ZNF343	ENSG00000088876	ENST00000358413	6
ZNF343	ENSG00000088876	ENST00000445484	2
OVOL2	ENSG00000125850	ENST00000278780	5
ZNF133	ENSG00000125846	ENST00000377671	2
ZNF133	ENSG00000125846	ENST00000360010	2
ZNF133	ENSG00000125846	ENST00000396026	2
ZNF133	ENSG00000125846	ENST00000402618	3
ZNF133	ENSG00000125846	ENST00000401790	3
ZNF133	ENSG00000125846	ENST00000434018	3
ZNF133	ENSG00000125846	ENST00000535822	3
ZNF133	ENSG00000125846	ENST00000316358	3
ZNF133	ENSG00000125846	ENST00000425686	0
INSM1	ENSG00000173404	ENST00000310227	4
GZF1	ENSG00000125812	ENST00000544236	6
GZF1	ENSG00000125812	ENST00000542987	6
GZF1	ENSG00000125812	ENST00000424216	4
GZF1	ENSG00000125812	ENST00000377051	6
ZNF337	ENSG00000130684	ENST00000538750	3
ZNF337	ENSG00000130684	ENST00000376436	4
ZNF337	ENSG00000130684	ENST00000252979	3
PLAGL2	ENSG00000126003	ENST00000246229	5
DNMT3B	ENSG00000088305	ENST00000328111	2
DNMT3B	ENSG00000088305	ENST00000353855	2
DNMT3B	ENSG00000088305	ENST00000443239	2
DNMT3B	ENSG00000088305	ENST00000344505	2
DNMT3B	ENSG00000088305	ENST00000375623	2
DNMT3B	ENSG00000088305	ENST00000456297	2
DNMT3B	ENSG00000088305	ENST00000201963	2
ZNF341	ENSG00000131061	ENST00000342427	3
L3MBTL1	ENSG00000185513	ENST00000427442	2
L3MBTL1	ENSG00000185513	ENST00000439769	2
L3MBTL1	ENSG00000185513	ENST00000444063	2
L3MBTL1	ENSG00000185513	ENST00000373134	2
HNF4A	ENSG00000101076	ENST00000316673	0
HNF4A	ENSG00000101076	ENST00000609795	0
HNF4A	ENSG00000101076	ENST00000443598	1
HNF4A	ENSG00000101076	ENST00000415691	1
ZNF335	ENSG00000198026	ENST00000322927	3
ZNF335	ENSG00000198026	ENST00000426788	3
ZNF334	ENSG00000198185	ENST00000347606	3
SNAI1	ENSG00000124216	ENST00000244050	10
ADNP	ENSG00000101126	ENST00000371602	0
ADNP	ENSG00000101126	ENST00000349014	4
ADNP	ENSG00000101126	ENST00000534467	0
ADNP	ENSG00000101126	ENST00000396029	2
ADNP	ENSG00000101126	ENST00000396032	1
SALL4	ENSG00000101115	ENST00000371539	3
SALL4	ENSG00000101115	ENST00000217086	4
ZFP64	ENSG00000020256	ENST00000371523	5
ZFP64	ENSG00000020256	ENST00000361387	4
ZFP64	ENSG00000020256	ENST00000346617	4
ZFP64	ENSG00000020256	ENST00000371515	4
ZFP64	ENSG00000020256	ENST00000216923	5
ZNF217	ENSG00000171940	ENST00000302342	2
ZNF217	ENSG00000171940	ENST00000371471	2
ZNF217	ENSG00000171940	ENST00000431687	3
CTCFL	ENSG00000124092	ENST00000608440	6
CTCFL	ENSG00000124092	ENST00000608263	7
CTCFL	ENSG00000124092	ENST00000423479	7
CTCFL	ENSG00000124092	ENST00000243914	8
CTCFL	ENSG00000124092	ENST00000371196	6
CTCFL	ENSG00000124092	ENST00000609232	6
GATA5	ENSG00000130700	ENST00000252997	5
ZGPAT	ENSG00000197114	ENST00000448100	1
ZGPAT	ENSG00000197114	ENST00000355969	1
ZGPAT	ENSG00000197114	ENST00000357119	1
ZGPAT	ENSG00000197114	ENST00000431125	1
ZGPAT	ENSG00000197114	ENST00000369967	1
ZGPAT	ENSG00000197114	ENST00000328969	1
ZBTB46	ENSG00000130584	ENST00000395104	4
ZBTB46	ENSG00000130584	ENST00000245663	0
ZBTB46	ENSG00000130584	ENST00000302995	0
ZNF512B	ENSG00000196700	ENST00000369888	2
ZNF512B	ENSG00000196700	ENST00000217130	4
ZNF512B	ENSG00000196700	ENST00000450537	2
MYT1	ENSG00000196132	ENST00000360149	3
MYT1	ENSG00000196132	ENST00000328439	4
PRDM15	ENSG00000141956	ENST00000447207	3
PRDM15	ENSG00000141956	ENST00000398548	4
PRDM15	ENSG00000141956	ENST00000269844	4
ZBTB21	ENSG00000173276	ENST00000425521	4
ZBTB21	ENSG00000173276	ENST00000310826	4
ZBTB21	ENSG00000173276	ENST00000398499	4
ZBTB21	ENSG00000173276	ENST00000398511	4
DNMT3L	ENSG00000142182	ENST00000270172	4
ZNF74	ENSG00000185252	ENST00000400451	3
ZNF74	ENSG00000185252	ENST00000356671	2
ZNF74	ENSG00000185252	ENST00000405993	0
THAP7	ENSG00000184436	ENST00000215742	9
THAP7	ENSG00000184436	ENST00000399133	9
[truncated: 75 more rows]

## Sheet: Basic
HGNC Gene Name	Ensembl Gene ID	Ensembl Transcript ID	SNP count				unique HGNC Gene Name only		Genes	170	Transcripts	432
HES4	ENSG00000188290	ENST00000304952	8				HES4
HES4	ENSG00000188290	ENST00000428771	8				HES5
HES5	ENSG00000197921	ENST00000378453	4				HES3
HES3	ENSG00000173673	ENST00000377898	2				HES2
HES2	ENSG00000069812	ENST00000377836	2				ID3
HES2	ENSG00000069812	ENST00000377834	2				TFAP2E
HES2	ENSG00000069812	ENST00000377837	5				HEYL
ID3	ENSG00000117318	ENST00000374561	0				MYCL
TFAP2E	ENSG00000116819	ENST00000373235	2				TAL1
HEYL	ENSG00000163909	ENST00000535435	2				JUN
HEYL	ENSG00000163909	ENST00000372852	3				NHLH2
MYCL	ENSG00000116990	ENST00000372816	6				ARNT
MYCL	ENSG00000116990	ENST00000429311	7				CREB3L4
MYCL	ENSG00000116990	ENST00000450953	3				NHLH1
TAL1	ENSG00000162367	ENST00000371883	1				USF1
TAL1	ENSG00000162367	ENST00000371884	3				ATF6
JUN	ENSG00000177606	ENST00000371222	5				MYOG
NHLH2	ENSG00000177551	ENST00000429731	5				ATF3
NHLH2	ENSG00000177551	ENST00000320238	3				BATF3
NHLH2	ENSG00000177551	ENST00000369506	4				ID2
ARNT	ENSG00000143437	ENST00000505755	2				MYCN
ARNT	ENSG00000143437	ENST00000515192	3				MSGN1
ARNT	ENSG00000143437	ENST00000358595	2				NCOA1
CREB3L4	ENSG00000143578	ENST00000405694	1				TCF23
CREB3L4	ENSG00000143578	ENST00000449724	1				FOSL2
CREB3L4	ENSG00000143578	ENST00000368607	1				EPAS1
CREB3L4	ENSG00000143578	ENST00000271889	1				MXD1
CREB3L4	ENSG00000143578	ENST00000368601	1				FIGLA
CREB3L4	ENSG00000143578	ENST00000368600	1				ATOH8
CREB3L4	ENSG00000143578	ENST00000431292	1				NPAS2
NHLH1	ENSG00000171786	ENST00000302101	2				ATF2
USF1	ENSG00000158773	ENST00000368020	5				NFE2L2
USF1	ENSG00000158773	ENST00000435396	1				NEUROD1
USF1	ENSG00000158773	ENST00000368021	1				CREB1
ATF6	ENSG00000118217	ENST00000367942	3				HES6
MYOG	ENSG00000122180	ENST00000241651	4				TWIST2
ATF3	ENSG00000162772	ENST00000366981	3				MITF
ATF3	ENSG00000162772	ENST00000366987	3				TSC22D2
ATF3	ENSG00000162772	ENST00000341491	1				HES1
ATF3	ENSG00000162772	ENST00000366985	1				MXD4
ATF3	ENSG00000162772	ENST00000336937	2				CLOCK
BATF3	ENSG00000123685	ENST00000243440	4				ATOH1
ID2	ENSG00000115738	ENST00000234091	5				NEUROG2
ID2	ENSG00000115738	ENST00000396290	3				HAND2
ID2	ENSG00000115738	ENST00000331129	4				HELT
MYCN	ENSG00000134323	ENST00000281043	0				AHRR
MSGN1	ENSG00000151379	ENST00000281047	4				NEUROG1
NCOA1	ENSG00000084676	ENST00000406961	1				HAND1
NCOA1	ENSG00000084676	ENST00000405141	3				MXD3
NCOA1	ENSG00000084676	ENST00000538539	0				TFAP2A
NCOA1	ENSG00000084676	ENST00000348332	1				ID4
NCOA1	ENSG00000084676	ENST00000395856	1				ATF6B
TCF23	ENSG00000163792	ENST00000296096	0				TFEB
FOSL2	ENSG00000075426	ENST00000264716	0				TFAP2B
FOSL2	ENSG00000075426	ENST00000545753	6				BACH2
EPAS1	ENSG00000116016	ENST00000449347	4				SIM1
EPAS1	ENSG00000116016	ENST00000263734	6				HEY2
MXD1	ENSG00000059728	ENST00000264444	0				TCF21
MXD1	ENSG00000059728	ENST00000540449	0				OLIG3
FIGLA	ENSG00000183733	ENST00000332372	2				MAFK
ATOH8	ENSG00000168874	ENST00000306279	1				AHR
NPAS2	ENSG00000170485	ENST00000335681	5				TWIST1
NPAS2	ENSG00000170485	ENST00000542504	3				FERD3L
ATF2	ENSG00000115966	ENST00000392544	4				NFE2L3
ATF2	ENSG00000115966	ENST00000264110	5				CREB5
NFE2L2	ENSG00000116044	ENST00000448782	3				NEUROD6
NFE2L2	ENSG00000116044	ENST00000397063	2				MLXIPL
NFE2L2	ENSG00000116044	ENST00000397062	6				BHLHA15
NFE2L2	ENSG00000116044	ENST00000588123	3				TSC22D4
NFE2L2	ENSG00000116044	ENST00000464747	5				TFEC
NEUROD1	ENSG00000162992	ENST00000295108	0				CREB3L2
CREB1	ENSG00000118260	ENST00000430624	4				CEBPD
CREB1	ENSG00000118260	ENST00000432329	2				BHLHE22
CREB1	ENSG00000118260	ENST00000353267	2				NCOA2
CREB1	ENSG00000118260	ENST00000445803	2				MSC
CREB1	ENSG00000118260	ENST00000536726	3				HEY1
CREB1	ENSG00000118260	ENST00000374397	3				MYC
CREB1	ENSG00000118260	ENST00000452474	3				MAFA
CREB1	ENSG00000118260	ENST00000414681	3				CREB3
CREB1	ENSG00000118260	ENST00000539789	3				NFIL3
HES6	ENSG00000144485	ENST00000409160	4				TAL2
HES6	ENSG00000144485	ENST00000272937	3				DEC1
TWIST2	ENSG00000233608	ENST00000448943	2				SOHLH1
MITF	ENSG00000187098	ENST00000352241	2				PTF1A
MITF	ENSG00000187098	ENST00000448226	2				CREM
MITF	ENSG00000187098	ENST00000457080	1				ATOH7
MITF	ENSG00000187098	ENST00000451708	0				NEUROG3
MITF	ENSG00000187098	ENST00000314589	0				MXI1
MITF	ENSG00000187098	ENST00000394355	1				UTF1
MITF	ENSG00000187098	ENST00000314557	1				ASCL2
MITF	ENSG00000187098	ENST00000394351	1				ASCL3
MITF	ENSG00000187098	ENST00000531774	1				ARNTL
TSC22D2	ENSG00000196428	ENST00000361136	2				MYOD1
HES1	ENSG00000114315	ENST00000232424	3				CREB3L1
MXD4	ENSG00000123933	ENST00000337190	7				BATF2
CLOCK	ENSG00000134852	ENST00000309964	7				FOSL1
CLOCK	ENSG00000134852	ENST00000435527	5				NPAS4
CLOCK	ENSG00000134852	ENST00000513440	3				CREBZF
ATOH1	ENSG00000172238	ENST00000306011	4				CREBL2
NEUROG2	ENSG00000178403	ENST00000313341	1				BHLHE41
HAND2	ENSG00000164107	ENST00000359562	3				ARNTL2
HELT	ENSG00000187821	ENST00000505610	0				ATF1
HELT	ENSG00000187821	ENST00000338875	0				ATF7
AHRR	ENSG00000063438	ENST00000505113	9				NFE2
NEUROG1	ENSG00000181965	ENST00000314744	2				NEUROD4
HAND1	ENSG00000113196	ENST00000231121	2				DDIT3
MXD3	ENSG00000213347	ENST00000427908	2				MYF6
MXD3	ENSG00000213347	ENST00000439742	2				MYF5
MXD3	ENSG00000213347	ENST00000513063	4				ASCL1
TFAP2A	ENSG00000137203	ENST00000379608	5				ASCL4
TFAP2A	ENSG00000137203	ENST00000379604	1				MLXIP
TFAP2A	ENSG00000137203	ENST00000482890	5				SOHLH2
TFAP2A	ENSG00000137203	ENST00000319516	3				TSC22D1
ID4	ENSG00000172201	ENST00000378700	7				CEBPE
ATF6B	ENSG00000213676	ENST00000453203	2				NRL
ATF6B	ENSG00000213676	ENST00000375203	0				NPAS3
ATF6B	ENSG00000213676	ENST00000375201	0				HIF1A
TFEB	ENSG00000112561	ENST00000419574	4				MAX
TFEB	ENSG00000112561	ENST00000416140	8				FOS
TFEB	ENSG00000112561	ENST00000424495	2				JDP2
TFEB	ENSG00000112561	ENST00000445700	1				BATF
TFEB	ENSG00000112561	ENST00000433032	2				MGA
TFEB	ENSG00000112561	ENST00000419396	5				TCF12
TFEB	ENSG00000112561	ENST00000230323	4				ARNT2
TFEB	ENSG00000112561	ENST00000373033	0				MESP1
TFEB	ENSG00000112561	ENST00000403298	1				MESP2
TFAP2B	ENSG00000008196	ENST00000344788	4				TFAP4
TFAP2B	ENSG00000008196	ENST00000263046	4				MAF
BACH2	ENSG00000112182	ENST00000257749	2				BHLHA9
BACH2	ENSG00000112182	ENST00000537989	1				MNT
SIM1	ENSG00000112246	ENST00000262901	3				HES7
SIM1	ENSG00000112246	ENST00000369208	4				SREBF1
HEY2	ENSG00000135547	ENST00000368365	1				NEUROD2
HEY2	ENSG00000135547	ENST00000368364	6				MLX
TCF21	ENSG00000118526	ENST00000367882	4				NFE2L1
TCF21	ENSG00000118526	ENST00000237316	4				HLF
OLIG3	ENSG00000177468	ENST00000367734	6				MAFG
MAFK	ENSG00000198517	ENST00000343242	4				TCF4
MAFK	ENSG00000198517	ENST00000406174	0				TCF3
AHR	ENSG00000106546	ENST00000242057	4				CREB3L3
TWIST1	ENSG00000122691	ENST00000242261	2				JUNB
FERD3L	ENSG00000146618	ENST00000275461	2				LYL1
NFE2L3	ENSG00000050344	ENST00000056233	2				JUND
CREB5	ENSG00000146592	ENST00000396299	0				CEBPA
CREB5	ENSG00000146592	ENST00000424599	3				CEBPG
CREB5	ENSG00000146592	ENST00000357727	2				USF2
CREB5	ENSG00000146592	ENST00000396300	3				FOSB
CREB5	ENSG00000146592	ENST00000409603	3				HIF3A
CREB5	ENSG00000146592	ENST00000396298	5				NPAS1
NEUROD6	ENSG00000164600	ENST00000297142	6				DBP
MLXIPL	ENSG00000009950	ENST00000414749	4				ATF5
MLXIPL	ENSG00000009950	ENST00000313375	4				TCF15
BHLHA15	ENSG00000180535	ENST00000609256	3				ID1
BHLHA15	ENSG00000180535	ENST00000314018	4				MAFB
TSC22D4	ENSG00000166925	ENST00000300181	2				NCOA3
TFEC	ENSG00000105967	ENST00000457268	1				CEBPB
TFEC	ENSG00000105967	ENST00000265440	0				TFAP2C
TFEC	ENSG00000105967	ENST00000393485	0				TCFL5
TFEC	ENSG00000105967	ENST00000320239	1				BHLHE23
CREB3L2	ENSG00000182158	ENST00000452463	2				BACH1
CREB3L2	ENSG00000182158	ENST00000330387	2				OLIG2
CREB3L2	ENSG00000182158	ENST00000456390	2				OLIG1
CEBPD	ENSG00000221869	ENST00000408965	3				SIM2
BHLHE22	ENSG00000180828	ENST00000321870	0				XBP1
NCOA2	ENSG00000140396	ENST00000267974	0				MAFF
NCOA2	ENSG00000140396	ENST00000519724	3				ATF4
NCOA2	ENSG00000140396	ENST00000520416	3				TEF
NCOA2	ENSG00000140396	ENST00000452400	6				SREBF2
MSC	ENSG00000178860	ENST00000325509	1				TFE3
HEY1	ENSG00000164683	ENST00000337919	1				TSC22D3
HEY1	ENSG00000164683	ENST00000354724	1
MYC	ENSG00000136997	ENST00000377970	2
MAFA	ENSG00000182759	ENST00000333480	4
CREB3	ENSG00000107175	ENST00000353704	2
NFIL3	ENSG00000165030	ENST00000297689	2
TAL2	ENSG00000186051	ENST00000334077	2
DEC1	ENSG00000173077	ENST00000374016	4
SOHLH1	ENSG00000165643	ENST00000298466	6
PTF1A	ENSG00000168267	ENST00000376504	5
CREM	ENSG00000095794	ENST00000374726	5
CREM	ENSG00000095794	ENST00000354759	5
CREM	ENSG00000095794	ENST00000489321	3
CREM	ENSG00000095794	ENST00000427847	3
CREM	ENSG00000095794	ENST00000395895	3
CREM	ENSG00000095794	ENST00000333809	5
CREM	ENSG00000095794	ENST00000337656	5
CREM	ENSG00000095794	ENST00000348787	4
CREM	ENSG00000095794	ENST00000361599	4
CREM	ENSG00000095794	ENST00000484283	4
CREM	ENSG00000095794	ENST00000342105	5
CREM	ENSG00000095794	ENST00000463960	5
CREM	ENSG00000095794	ENST00000487763	2
CREM	ENSG00000095794	ENST00000488328	2
CREM	ENSG00000095794	ENST00000356917	2
CREM	ENSG00000095794	ENST00000488741	0
CREM	ENSG00000095794	ENST00000474931	0
CREM	ENSG00000095794	ENST00000344351	0
CREM	ENSG00000095794	ENST00000490511	1
ATOH7	ENSG00000179774	ENST00000373673	1
NEUROG3	ENSG00000122859	ENST00000242462	2
MXI1	ENSG00000119950	ENST00000332674	2
MXI1	ENSG00000119950	ENST00000453116	3
MXI1	ENSG00000119950	ENST00000361248	2
MXI1	ENSG00000119950	ENST00000239007	2
MXI1	ENSG00000119950	ENST00000393134	1
MXI1	ENSG00000119950	ENST00000442296	6
MXI1	ENSG00000119950	ENST00000369612	9
UTF1	ENSG00000171794	ENST00000304477	5
ASCL2	ENSG00000183734	ENST00000331289	8
ASCL3	ENSG00000176009	ENST00000531618	8
ASCL3	ENSG00000176009	ENST00000325884	3
ARNTL	ENSG00000133794	ENST00000529050	5
ARNTL	ENSG00000133794	ENST00000527998	7
ARNTL	ENSG00000133794	ENST00000396441	6
ARNTL	ENSG00000133794	ENST00000533520	6
ARNTL	ENSG00000133794	ENST00000529825	6
ARNTL	ENSG00000133794	ENST00000389707	6
ARNTL	ENSG00000133794	ENST00000529388	6
ARNTL	ENSG00000133794	ENST00000530357	5
ARNTL	ENSG00000133794	ENST00000361003	5
ARNTL	ENSG00000133794	ENST00000403510	5
ARNTL	ENSG00000133794	ENST00000482049	5
MYOD1	ENSG00000129152	ENST00000250003	4
CREB3L1	ENSG00000157613	ENST00000529193	1
CREB3L1	ENSG00000157613	ENST00000288400	1
BATF2	ENSG00000168062	ENST00000301887	2
FOSL1	ENSG00000175592	ENST00000312562	3
NPAS4	ENSG00000174576	ENST00000311034	1
CREBZF	ENSG00000137504	ENST00000398294	1
CREBZF	ENSG00000137504	ENST00000527447	1
CREBL2	ENSG00000111269	ENST00000228865	4
BHLHE41	ENSG00000123095	ENST00000242728	4
ARNTL2	ENSG00000029153	ENST00000544915	2
ARNTL2	ENSG00000029153	ENST00000395901	2
ARNTL2	ENSG00000029153	ENST00000311001	3
ARNTL2	ENSG00000029153	ENST00000542388	6
ATF1	ENSG00000123268	ENST00000552510	6
ATF1	ENSG00000123268	ENST00000262053	1
ATF1	ENSG00000123268	ENST00000539132	5
ATF1	ENSG00000123268	ENST00000552487	5
ATF7	ENSG00000170653	ENST00000328463	2
ATF7	ENSG00000170653	ENST00000588078	3
ATF7	ENSG00000170653	ENST00000548118	3
ATF7	ENSG00000170653	ENST00000456903	3
ATF7	ENSG00000170653	ENST00000548446	3
ATF7	ENSG00000170653	ENST00000420353	3
ATF7	ENSG00000170653	ENST00000591397	3
ATF7	ENSG00000170653	ENST00000415113	3
NFE2	ENSG00000123405	ENST00000540264	0
NFE2	ENSG00000123405	ENST00000312156	0
NFE2	ENSG00000123405	ENST00000553198	2
NFE2	ENSG00000123405	ENST00000553070	0
NFE2	ENSG00000123405	ENST00000435572	0
NEUROD4	ENSG00000123307	ENST00000242994	4
DDIT3	ENSG00000175197	ENST00000547303	7
DDIT3	ENSG00000175197	ENST00000552740	7
DDIT3	ENSG00000175197	ENST00000551116	7
MYF6	ENSG00000111046	ENST00000228641	2
MYF5	ENSG00000111049	ENST00000228644	5
ASCL1	ENSG00000139352	ENST00000266744	1
ASCL4	ENSG00000187855	ENST00000342331	2
MLXIP	ENSG00000175727	ENST00000319080	3
MLXIP	ENSG00000175727	ENST00000538698	2
MLXIP	ENSG00000175727	ENST00000377037	3
SOHLH2	ENSG00000120669	ENST00000379881	4
SOHLH2	ENSG00000120669	ENST00000554962	4
TSC22D1	ENSG00000102804	ENST00000261489	4
TSC22D1	ENSG00000102804	ENST00000472477	3
TSC22D1	ENSG00000102804	ENST00000501704	2
TSC22D1	ENSG00000102804	ENST00000458659	0
TSC22D1	ENSG00000102804	ENST00000493016	3
CEBPE	ENSG00000092067	ENST00000206513	7
NRL	ENSG00000129535	ENST00000397002	0
NRL	ENSG00000129535	ENST00000396997	3
NRL	ENSG00000129535	ENST00000558280	1
NRL	ENSG00000129535	ENST00000561028	1
NPAS3	ENSG00000151322	ENST00000346562	5
NPAS3	ENSG00000151322	ENST00000341321	5
NPAS3	ENSG00000151322	ENST00000548645	4
NPAS3	ENSG00000151322	ENST00000356141	3
NPAS3	ENSG00000151322	ENST00000547068	5
HIF1A	ENSG00000100644	ENST00000337138	3
HIF1A	ENSG00000100644	ENST00000539097	2
MAX	ENSG00000125952	ENST00000341653	1
MAX	ENSG00000125952	ENST00000358664	1
MAX	ENSG00000125952	ENST00000358402	1
MAX	ENSG00000125952	ENST00000246163	1
MAX	ENSG00000125952	ENST00000556979	1
FOS	ENSG00000170345	ENST00000303562	5
JDP2	ENSG00000140044	ENST00000419727	0
JDP2	ENSG00000140044	ENST00000559060	0
JDP2	ENSG00000140044	ENST00000437176	1
JDP2	ENSG00000140044	ENST00000435893	2
JDP2	ENSG00000140044	ENST00000267569	4
BATF	ENSG00000156127	ENST00000286639	0
MGA	ENSG00000174197	ENST00000563576	2
MGA	ENSG00000174197	ENST00000566718	0
MGA	ENSG00000174197	ENST00000566586	2
MGA	ENSG00000174197	ENST00000570161	1
TCF12	ENSG00000140262	ENST00000438423	3
TCF12	ENSG00000140262	ENST00000267811	3
TCF12	ENSG00000140262	ENST00000452095	3
TCF12	ENSG00000140262	ENST00000343827	1
TCF12	ENSG00000140262	ENST00000560836	3
TCF12	ENSG00000140262	ENST00000560948	3
ARNT2	ENSG00000172379	ENST00000303329	3
ARNT2	ENSG00000172379	ENST00000533983	0
ARNT2	ENSG00000172379	ENST00000527771	0
MESP1	ENSG00000166823	ENST00000300057	4
MESP2	ENSG00000188095	ENST00000341735	5
TFAP4	ENSG00000090447	ENST00000204517	0
MAF	ENSG00000178573	ENST00000326043	5
BHLHA9	ENSG00000205899	ENST00000391429	4
MNT	ENSG00000070444	ENST00000174618	2
HES7	ENSG00000179111	ENST00000541682	4
SREBF1	ENSG00000072310	ENST00000435530	2
SREBF1	ENSG00000072310	ENST00000355815	1
SREBF1	ENSG00000072310	ENST00000261646	1
SREBF1	ENSG00000072310	ENST00000338854	1
NEUROD2	ENSG00000171532	ENST00000302584	2
MLX	ENSG00000108788	ENST00000435881	1
MLX	ENSG00000108788	ENST00000246912	1
NFE2L1	ENSG00000082641	ENST00000579889	1
NFE2L1	ENSG00000082641	ENST00000584137	1
NFE2L1	ENSG00000082641	ENST00000585291	1
NFE2L1	ENSG00000082641	ENST00000357480	1
NFE2L1	ENSG00000082641	ENST00000581441	9
HLF	ENSG00000108924	ENST00000226067	1
MAFG	ENSG00000197063	ENST00000392366	3
MAFG	ENSG00000197063	ENST00000574686	2
MAFG	ENSG00000197063	ENST00000357736	2
TCF4	ENSG00000196628	ENST00000561831	1
TCF4	ENSG00000196628	ENST00000570287	0
TCF4	ENSG00000196628	ENST00000457482	2
TCF4	ENSG00000196628	ENST00000537856	0
TCF4	ENSG00000196628	ENST00000570177	2
TCF4	ENSG00000196628	ENST00000544241	2
TCF4	ENSG00000196628	ENST00000543082	2
TCF4	ENSG00000196628	ENST00000566286	1
TCF4	ENSG00000196628	ENST00000564999	1
TCF4	ENSG00000196628	ENST00000354452	1
TCF4	ENSG00000196628	ENST00000565018	2
TCF4	ENSG00000196628	ENST00000564403	1
TCF4	ENSG00000196628	ENST00000537578	1
TCF4	ENSG00000196628	ENST00000562543	1
TCF4	ENSG00000196628	ENST00000398339	5
TCF3	ENSG00000071564	ENST00000585731	5
TCF3	ENSG00000071564	ENST00000587425	4
TCF3	ENSG00000071564	ENST00000592628	5
TCF3	ENSG00000071564	ENST00000593064	6
TCF3	ENSG00000071564	ENST00000588136	0
TCF3	ENSG00000071564	ENST00000586318	2
TCF3	ENSG00000071564	ENST00000344749	0
TCF3	ENSG00000071564	ENST00000262965	2
CREB3L3	ENSG00000060566	ENST00000078445	7
CREB3L3	ENSG00000060566	ENST00000252587	7
JUNB	ENSG00000171223	ENST00000302754	2
LYL1	ENSG00000104903	ENST00000264824	4
JUND	ENSG00000130522	ENST00000252818	8
CEBPA	ENSG00000245848	ENST00000498907	3
CEBPG	ENSG00000153879	ENST00000284000	4
CEBPG	ENSG00000153879	ENST00000585933	4
USF2	ENSG00000105698	ENST00000343550	1
USF2	ENSG00000105698	ENST00000222305	1
FOSB	ENSG00000125740	ENST00000417353	1
HIF3A	ENSG00000124440	ENST00000377670	8
HIF3A	ENSG00000124440	ENST00000244303	6
HIF3A	ENSG00000124440	ENST00000339613	6
HIF3A	ENSG00000124440	ENST00000300862	5
HIF3A	ENSG00000124440	ENST00000420102	3
NPAS1	ENSG00000130751	ENST00000602212	3
NPAS1	ENSG00000130751	ENST00000449844	4
DBP	ENSG00000105516	ENST00000222122	1
ATF5	ENSG00000169136	ENST00000595125	4
ATF5	ENSG00000169136	ENST00000423777	7
ATF5	ENSG00000169136	ENST00000597227	6
ATF5	ENSG00000169136	ENST00000596658	4
TCF15	ENSG00000125878	ENST00000246080	7
ID1	ENSG00000125968	ENST00000376112	10
ID1	ENSG00000125968	ENST00000376105	10
MAFB	ENSG00000204103	ENST00000396967	1
MAFB	ENSG00000204103	ENST00000373313	4
NCOA3	ENSG00000124151	ENST00000341724	3
NCOA3	ENSG00000124151	ENST00000372004	3
NCOA3	ENSG00000124151	ENST00000371998	3
NCOA3	ENSG00000124151	ENST00000371997	3
CEBPB	ENSG00000172216	ENST00000303004	2
TFAP2C	ENSG00000087510	ENST00000201031	2
TFAP2C	ENSG00000087510	ENST00000544508	3
TCFL5	ENSG00000101190	ENST00000335351	12
BHLHE23	ENSG00000125533	ENST00000370346	9
BACH1	ENSG00000156273	ENST00000548219	4
BACH1	ENSG00000156273	ENST00000550131	5
BACH1	ENSG00000156273	ENST00000286800	3
BACH1	ENSG00000156273	ENST00000399921	4
BACH1	ENSG00000156273	ENST00000548467	3
BACH1	ENSG00000156273	ENST00000451655	1
BACH1	ENSG00000156273	ENST00000447177	0
BACH1	ENSG00000156273	ENST00000435072	2
OLIG2	ENSG00000205927	ENST00000382357	2
OLIG2	ENSG00000205927	ENST00000430860	1
OLIG1	ENSG00000184221	ENST00000333063	0
OLIG1	ENSG00000184221	ENST00000426947	2
SIM2	ENSG00000159263	ENST00000290399	5
SIM2	ENSG00000159263	ENST00000430056	2
XBP1	ENSG00000100219	ENST00000344347	7
XBP1	ENSG00000100219	ENST00000216037	7
MAFF	ENSG00000185022	ENST00000338483	3
MAFF	ENSG00000185022	ENST00000538320	2
MAFF	ENSG00000185022	ENST00000417948	2
MAFF	ENSG00000185022	ENST00000426621	3
MAFF	ENSG00000185022	ENST00000407965	1
ATF4	ENSG00000128272	ENST00000404241	1
ATF4	ENSG00000128272	ENST00000337304	5
TEF	ENSG00000167074	ENST00000266304	4
TEF	ENSG00000167074	ENST00000413942	6
SREBF2	ENSG00000198911	ENST00000361204	2
TFE3	ENSG00000068323	ENST00000315869	0
TSC22D3	ENSG00000157514	ENST00000486554	0
TSC22D3	ENSG00000157514	ENST00000372390	0
TSC22D3	ENSG00000157514	ENST00000372397	0
TSC22D3	ENSG00000157514	ENST00000372383	0
TSC22D3	ENSG00000157514	ENST00000315660	0
TSC22D3	ENSG00000157514	ENST00000372384	0
TSC22D3	ENSG00000157514	ENST00000502650	0
TSC22D3	ENSG00000157514	ENST00000506724	0
TSC22D3	ENSG00000157514	ENST00000510887	1
TSC22D3	ENSG00000157514	ENST00000480691	0
TSC22D3	ENSG00000157514	ENST00000506081	0
TSC22D3	ENSG00000157514	ENST00000502961	1
TSC22D3	ENSG00000157514	ENST00000505965	1
TSC22D3	ENSG00000157514	ENST00000514897	1

## Sheet: Other
HGNC Gene Name	Ensembl Gene ID	Ensembl Transcript ID	SNP count				unique HGNC Gene Name only		Genes	160	Transcripts	554
TP73	ENSG00000078900	ENST00000378295	2				TP73
TP73	ENSG00000078900	ENST00000354437	1				GRHL3
TP73	ENSG00000078900	ENST00000603362	9				RUNX3
TP73	ENSG00000078900	ENST00000378285	4				GMEB1
GRHL3	ENSG00000158055	ENST00000361548	1				SFPQ
GRHL3	ENSG00000158055	ENST00000342072	1				NFYC
GRHL3	ENSG00000158055	ENST00000350501	1				YBX1
GRHL3	ENSG00000158055	ENST00000236255	3				NFIA
RUNX3	ENSG00000020633	ENST00000540420	2				TBX15
RUNX3	ENSG00000020633	ENST00000308873	1				MEF2D
RUNX3	ENSG00000020633	ENST00000338888	4				TBX19
RUNX3	ENSG00000020633	ENST00000399916	4				SOX13
GMEB1	ENSG00000162419	ENST00000373816	1				SOX11
GMEB1	ENSG00000162419	ENST00000361872	1				GRHL1
GMEB1	ENSG00000162419	ENST00000294409	1				REL
SFPQ	ENSG00000116560	ENST00000357214	4				TCF7L1
NFYC	ENSG00000066136	ENST00000427410	1				TFCP2L1
NFYC	ENSG00000066136	ENST00000447388	1				TBR1
NFYC	ENSG00000066136	ENST00000425457	1				CSRNP3
NFYC	ENSG00000066136	ENST00000453631	1				STAT1
NFYC	ENSG00000066136	ENST00000456393	1				STAT4
NFYC	ENSG00000066136	ENST00000372654	1				SP110
NFYC	ENSG00000066136	ENST00000534399	1				SP140
NFYC	ENSG00000066136	ENST00000372653	1				SP140L
NFYC	ENSG00000066136	ENST00000372652	1				SP100
NFYC	ENSG00000066136	ENST00000372651	1				LRRFIP1
NFYC	ENSG00000066136	ENST00000531464	1				EOMES
NFYC	ENSG00000066136	ENST00000440226	3				UBP1
NFYC	ENSG00000066136	ENST00000308733	1				LRRFIP2
YBX1	ENSG00000065978	ENST00000321358	0				CSRNP1
YBX1	ENSG00000065978	ENST00000332220	0				PBRM1
YBX1	ENSG00000065978	ENST00000436427	0				NFKBIZ
NFIA	ENSG00000162599	ENST00000407417	4				BBX
NFIA	ENSG00000162599	ENST00000371189	0				SOX14
NFIA	ENSG00000162599	ENST00000403491	0				SOX2
NFIA	ENSG00000162599	ENST00000371187	1				TP63
TBX15	ENSG00000092607	ENST00000207157	4				WHSC1
MEF2D	ENSG00000116604	ENST00000360595	4				RBPJ
MEF2D	ENSG00000116604	ENST00000340875	0				NFXL1
MEF2D	ENSG00000116604	ENST00000489057	0				NFKB1
MEF2D	ENSG00000116604	ENST00000348159	0				LEF1
TBX19	ENSG00000143178	ENST00000367821	0				SMAD1
TBX19	ENSG00000143178	ENST00000431969	0				MEF2C
TBX19	ENSG00000143178	ENST00000441464	3				TCF7
SOX13	ENSG00000143842	ENST00000367204	1				SMAD5
SOX13	ENSG00000143842	ENST00000525442	2				PURA
SOX13	ENSG00000143842	ENST00000528591	6				HMGXB3
SOX11	ENSG00000176887	ENST00000322002	4				SOX30
GRHL1	ENSG00000134317	ENST00000405379	5				EBF1
GRHL1	ENSG00000134317	ENST00000324883	5				GCM2
GRHL1	ENSG00000134317	ENST00000324907	5				SOX4
REL	ENSG00000162924	ENST00000295025	1				NFKBIL1
TCF7L1	ENSG00000152284	ENST00000282111	0				HMGA1
TFCP2L1	ENSG00000115112	ENST00000263707	6				NFYA
TBR1	ENSG00000136535	ENST00000389554	1				SRF
CSRNP3	ENSG00000178662	ENST00000421875	1				NFKBIE
CSRNP3	ENSG00000178662	ENST00000409664	1				RUNX2
CSRNP3	ENSG00000178662	ENST00000342316	2				GCM1
STAT1	ENSG00000115415	ENST00000540176	3				TBX18
STAT1	ENSG00000115415	ENST00000409465	6				TBPL1
STAT1	ENSG00000115415	ENST00000392322	6				T
STAT1	ENSG00000115415	ENST00000424722	6				TBP
STAT1	ENSG00000115415	ENST00000361099	7				TBX20
STAT1	ENSG00000115415	ENST00000454414	2				PURB
STAT1	ENSG00000115415	ENST00000432058	5				HBP1
STAT4	ENSG00000138378	ENST00000392320	2				NRF1
STAT4	ENSG00000138378	ENST00000358470	3				SOX7
STAT4	ENSG00000138378	ENST00000432798	3				EBF2
STAT4	ENSG00000138378	ENST00000450994	3				PURG
SP110	ENSG00000135899	ENST00000409815	3				SOX17
SP110	ENSG00000135899	ENST00000258381	5				TOX
SP110	ENSG00000135899	ENST00000358662	5				GRHL2
SP110	ENSG00000135899	ENST00000392048	5				TONSL
SP110	ENSG00000135899	ENST00000258382	5				NFIB
SP110	ENSG00000135899	ENST00000540870	1				NFX1
SP140	ENSG00000079263	ENST00000350136	3				TFAM
SP140	ENSG00000079263	ENST00000392045	3				NFKB2
SP140	ENSG00000079263	ENST00000420434	3				TCF7L2
SP140L	ENSG00000185404	ENST00000444636	6				EBF3
SP140L	ENSG00000185404	ENST00000243810	5				DEAF1
SP140L	ENSG00000185404	ENST00000458341	9				SOX6
SP100	ENSG00000067066	ENST00000264052	10				SSRP1
SP100	ENSG00000067066	ENST00000427101	7				MYRF
SP100	ENSG00000067066	ENST00000409341	7				RELA
SP100	ENSG00000067066	ENST00000341950	6				TBX10
LRRFIP1	ENSG00000124831	ENST00000289175	10				YBX3
LRRFIP1	ENSG00000124831	ENST00000244815	10				SOX5
LRRFIP1	ENSG00000124831	ENST00000392000	8				CSRNP2
EOMES	ENSG00000163508	ENST00000449599	2				TFCP2
EOMES	ENSG00000163508	ENST00000295743	2				STAT2
EOMES	ENSG00000163508	ENST00000537516	3				STAT6
UBP1	ENSG00000153560	ENST00000447368	2				HMGA2
UBP1	ENSG00000153560	ENST00000283629	4				NFYB
UBP1	ENSG00000153560	ENST00000283628	3				TBX5
UBP1	ENSG00000153560	ENST00000456378	3				TBX3
LRRFIP2	ENSG00000093167	ENST00000336686	3				PSPC1
LRRFIP2	ENSG00000093167	ENST00000434749	0				RFXAP
LRRFIP2	ENSG00000093167	ENST00000436858	0				SMAD9
LRRFIP2	ENSG00000093167	ENST00000452742	1				SOX21
LRRFIP2	ENSG00000093167	ENST00000421307	1				SOX1
CSRNP1	ENSG00000144655	ENST00000273153	5				TOX4
CSRNP1	ENSG00000144655	ENST00000514182	5				NFATC4
PBRM1	ENSG00000163939	ENST00000296302	0				NFKBIA
PBRM1	ENSG00000163939	ENST00000356770	0				TBPL2
PBRM1	ENSG00000163939	ENST00000439181	3				MGA
PBRM1	ENSG00000163939	ENST00000449505	3				SMAD6
PBRM1	ENSG00000163939	ENST00000424867	3				SMAD3
PBRM1	ENSG00000163939	ENST00000394830	3				HMG20A
PBRM1	ENSG00000163939	ENST00000431678	3				MEF2A
PBRM1	ENSG00000163939	ENST00000458294	4				SOX8
PBRM1	ENSG00000163939	ENST00000420148	3				TBX6
NFKBIZ	ENSG00000144802	ENST00000461724	1				TOX3
NFKBIZ	ENSG00000144802	ENST00000483180	1				NFATC3
NFKBIZ	ENSG00000144802	ENST00000326151	2				NFAT5
NFKBIZ	ENSG00000144802	ENST00000491281	0				TCF25
BBX	ENSG00000114439	ENST00000415149	2				YBX2
BBX	ENSG00000114439	ENST00000325805	2				SOX15
BBX	ENSG00000114439	ENST00000427402	1				TP53
BBX	ENSG00000114439	ENST00000454540	2				SMARCE1
BBX	ENSG00000114439	ENST00000449335	0				STAT5B
BBX	ENSG00000114439	ENST00000456817	0				STAT5A
BBX	ENSG00000114439	ENST00000456419	3				STAT3
BBX	ENSG00000114439	ENST00000402163	3				UBTF
BBX	ENSG00000114439	ENST00000406780	0				TBX21
BBX	ENSG00000114439	ENST00000413213	1				TBX4
BBX	ENSG00000114439	ENST00000449271	1				SOX9
BBX	ENSG00000114439	ENST00000425868	1				SMAD2
BBX	ENSG00000114439	ENST00000449213	1				SMAD7
BBX	ENSG00000114439	ENST00000457496	2				SMAD4
BBX	ENSG00000114439	ENST00000429270	4				NFATC1
SOX14	ENSG00000168875	ENST00000306087	2				NFIC
SOX2	ENSG00000181449	ENST00000431565	0				HMG20B
SOX2	ENSG00000181449	ENST00000325404	0				NFIX
TP63	ENSG00000073282	ENST00000264731	4				MEF2B
TP63	ENSG00000073282	ENST00000418709	4				RFXANK
TP63	ENSG00000073282	ENST00000392460	4				NFKBID
TP63	ENSG00000073282	ENST00000354600	5				NFKBIB
TP63	ENSG00000073282	ENST00000437221	5				CIC
WHSC1	ENSG00000109685	ENST00000508803	0				BCL3
WHSC1	ENSG00000109685	ENST00000507820	0				RELB
WHSC1	ENSG00000109685	ENST00000514045	0				PPP1R13L
WHSC1	ENSG00000109685	ENST00000515806	2				SOX12
WHSC1	ENSG00000109685	ENST00000436793	3				EBF4
WHSC1	ENSG00000109685	ENST00000420906	3				TOX2
WHSC1	ENSG00000109685	ENST00000503128	3				RBPJL
WHSC1	ENSG00000109685	ENST00000509115	1				ZNFX1
WHSC1	ENSG00000109685	ENST00000398261	1				NFATC2
WHSC1	ENSG00000109685	ENST00000382888	1				GMEB2
RBPJ	ENSG00000168214	ENST00000512351	10				SOX18
RBPJ	ENSG00000168214	ENST00000506956	0				RUNX1
RBPJ	ENSG00000168214	ENST00000512671	0				AIRE
RBPJ	ENSG00000168214	ENST00000345843	0				TBX1
RBPJ	ENSG00000168214	ENST00000361572	4				HMGXB4
RBPJ	ENSG00000168214	ENST00000514807	3				SOX10
RBPJ	ENSG00000168214	ENST00000348160	3				PHF5A
RBPJ	ENSG00000168214	ENST00000509158	3				NONO
RBPJ	ENSG00000168214	ENST00000355476	3				TAF1
RBPJ	ENSG00000168214	ENST00000505958	3				TBX22
RBPJ	ENSG00000168214	ENST00000507561	4				SOX3
RBPJ	ENSG00000168214	ENST00000514730	1				SRY
RBPJ	ENSG00000168214	ENST00000507574	2
RBPJ	ENSG00000168214	ENST00000514675	4
RBPJ	ENSG00000168214	ENST00000515573	3
RBPJ	ENSG00000168214	ENST00000511546	1
RBPJ	ENSG00000168214	ENST00000342320	1
RBPJ	ENSG00000168214	ENST00000504938	1
NFXL1	ENSG00000170448	ENST00000381538	2
NFKB1	ENSG00000109320	ENST00000226574	2
NFKB1	ENSG00000109320	ENST00000394820	2
NFKB1	ENSG00000109320	ENST00000511926	2
NFKB1	ENSG00000109320	ENST00000505458	1
NFKB1	ENSG00000109320	ENST00000509165	1
LEF1	ENSG00000138795	ENST00000438313	1
LEF1	ENSG00000138795	ENST00000265165	1
LEF1	ENSG00000138795	ENST00000379951	2
SMAD1	ENSG00000170365	ENST00000514778	2
SMAD1	ENSG00000170365	ENST00000507594	2
SMAD1	ENSG00000170365	ENST00000514831	7
SMAD1	ENSG00000170365	ENST00000302085	8
SMAD1	ENSG00000170365	ENST00000512019	8
SMAD1	ENSG00000170365	ENST00000503324	3
SMAD1	ENSG00000170365	ENST00000507367	2
SMAD1	ENSG00000170365	ENST00000394092	2
SMAD1	ENSG00000170365	ENST00000515385	2
MEF2C	ENSG00000081189	ENST00000539796	1
MEF2C	ENSG00000081189	ENST00000509373	3
MEF2C	ENSG00000081189	ENST00000506716	3
MEF2C	ENSG00000081189	ENST00000507984	1
MEF2C	ENSG00000081189	ENST00000508610	0
MEF2C	ENSG00000081189	ENST00000513252	0
MEF2C	ENSG00000081189	ENST00000510942	1
MEF2C	ENSG00000081189	ENST00000514028	1
MEF2C	ENSG00000081189	ENST00000514015	1
MEF2C	ENSG00000081189	ENST00000503075	1
MEF2C	ENSG00000081189	ENST00000437473	1
MEF2C	ENSG00000081189	ENST00000504921	1
MEF2C	ENSG00000081189	ENST00000502983	3
MEF2C	ENSG00000081189	ENST00000424173	1
TCF7	ENSG00000081059	ENST00000378564	2
TCF7	ENSG00000081059	ENST00000518887	3
TCF7	ENSG00000081059	ENST00000521639	3
TCF7	ENSG00000081059	ENST00000432532	3
TCF7	ENSG00000081059	ENST00000520958	3
TCF7	ENSG00000081059	ENST00000518915	3
SMAD5	ENSG00000113658	ENST00000507118	1
SMAD5	ENSG00000113658	ENST00000509297	2
SMAD5	ENSG00000113658	ENST00000506223	3
PURA	ENSG00000185129	ENST00000331327	1
HMGXB3	ENSG00000113716	ENST00000502717	3
SOX30	ENSG00000039600	ENST00000311371	4
SOX30	ENSG00000039600	ENST00000265007	3
EBF1	ENSG00000164330	ENST00000380654	3
EBF1	ENSG00000164330	ENST00000313708	3
GCM2	ENSG00000124827	ENST00000379491	3
SOX4	ENSG00000124766	ENST00000244745	0
SOX4	ENSG00000124766	ENST00000543472	0
NFKBIL1	ENSG00000204498	ENST00000376146	4
NFKBIL1	ENSG00000204498	ENST00000376148	5
NFKBIL1	ENSG00000204498	ENST00000376145	4
HMGA1	ENSG00000137309	ENST00000447654	3
HMGA1	ENSG00000137309	ENST00000395004	3
HMGA1	ENSG00000137309	ENST00000374116	6
NFYA	ENSG00000001167	ENST00000341376	0
NFYA	ENSG00000001167	ENST00000353205	0
SRF	ENSG00000112658	ENST00000265354	0
SRF	ENSG00000112658	ENST00000457278	1
NFKBIE	ENSG00000146232	ENST00000443607	4
NFKBIE	ENSG00000146232	ENST00000275015	9
RUNX2	ENSG00000124813	ENST00000352853	3
RUNX2	ENSG00000124813	ENST00000371438	1
RUNX2	ENSG00000124813	ENST00000371436	0
RUNX2	ENSG00000124813	ENST00000371432	1
RUNX2	ENSG00000124813	ENST00000359524	2
GCM1	ENSG00000137270	ENST00000259803	1
TBX18	ENSG00000112837	ENST00000369663	0
TBPL1	ENSG00000028839	ENST00000416965	7
TBPL1	ENSG00000028839	ENST00000457715	7
TBPL1	ENSG00000028839	ENST00000367871	5
TBPL1	ENSG00000028839	ENST00000367869	5
T	ENSG00000164458	ENST00000296946	2
T	ENSG00000164458	ENST00000461348	2
TBP	ENSG00000112592	ENST00000392092	5
TBP	ENSG00000112592	ENST00000230354	6
TBX20	ENSG00000164532	ENST00000408931	4
PURB	ENSG00000146676	ENST00000395699	3
HBP1	ENSG00000105856	ENST00000468410	2
HBP1	ENSG00000105856	ENST00000478930	2
HBP1	ENSG00000105856	ENST00000464009	2
HBP1	ENSG00000105856	ENST00000222574	2
HBP1	ENSG00000105856	ENST00000468401	7
HBP1	ENSG00000105856	ENST00000497535	8
HBP1	ENSG00000105856	ENST00000485846	8
HBP1	ENSG00000105856	ENST00000479011	3
HBP1	ENSG00000105856	ENST00000498408	1
NRF1	ENSG00000106459	ENST00000393232	5
NRF1	ENSG00000106459	ENST00000539636	5
NRF1	ENSG00000106459	ENST00000454688	5
NRF1	ENSG00000106459	ENST00000223190	5
NRF1	ENSG00000106459	ENST00000393230	3
NRF1	ENSG00000106459	ENST00000393231	1
SOX7	ENSG00000171056	ENST00000304501	3
SOX7	ENSG00000171056	ENST00000553390	7
EBF2	ENSG00000221818	ENST00000535548	5
EBF2	ENSG00000221818	ENST00000520164	4
PURG	ENSG00000172733	ENST00000523392	3
PURG	ENSG00000172733	ENST00000339382	4
SOX17	ENSG00000164736	ENST00000297316	1
TOX	ENSG00000198846	ENST00000361421	3
GRHL2	ENSG00000083307	ENST00000251808	2
GRHL2	ENSG00000083307	ENST00000521085	2
GRHL2	ENSG00000083307	ENST00000395927	3
TONSL	ENSG00000160949	ENST00000409379	2
NFIB	ENSG00000147862	ENST00000543693	3
NFIB	ENSG00000147862	ENST00000380953	1
NFIB	ENSG00000147862	ENST00000380959	2
NFIB	ENSG00000147862	ENST00000397575	2
NFIB	ENSG00000147862	ENST00000397581	3
NFIB	ENSG00000147862	ENST00000380934	7
NFX1	ENSG00000086102	ENST00000379540	4
NFX1	ENSG00000086102	ENST00000379521	4
NFX1	ENSG00000086102	ENST00000318524	3
TFAM	ENSG00000108064	ENST00000487519	1
TFAM	ENSG00000108064	ENST00000373895	6
TFAM	ENSG00000108064	ENST00000395377	7
NFKB2	ENSG00000077150	ENST00000601386	2
NFKB2	ENSG00000077150	ENST00000428099	3
NFKB2	ENSG00000077150	ENST00000369966	2
NFKB2	ENSG00000077150	ENST00000471698	1
NFKB2	ENSG00000077150	ENST00000189444	1
TCF7L2	ENSG00000148737	ENST00000534894	4
TCF7L2	ENSG00000148737	ENST00000349937	4
TCF7L2	ENSG00000148737	ENST00000352065	6
TCF7L2	ENSG00000148737	ENST00000369395	6
TCF7L2	ENSG00000148737	ENST00000542695	7
TCF7L2	ENSG00000148737	ENST00000346198	5
TCF7L2	ENSG00000148737	ENST00000369389	1
TCF7L2	ENSG00000148737	ENST00000277945	0
TCF7L2	ENSG00000148737	ENST00000369386	2
EBF3	ENSG00000108001	ENST00000440978	4
EBF3	ENSG00000108001	ENST00000368648	2
DEAF1	ENSG00000177030	ENST00000338675	0
DEAF1	ENSG00000177030	ENST00000382409	7
SOX6	ENSG00000110693	ENST00000316399	2
SOX6	ENSG00000110693	ENST00000526673	1
SOX6	ENSG00000110693	ENST00000533411	3
SOX6	ENSG00000110693	ENST00000528429	2
SOX6	ENSG00000110693	ENST00000528252	4
SOX6	ENSG00000110693	ENST00000529469	3
SOX6	ENSG00000110693	ENST00000352083	1
SSRP1	ENSG00000149136	ENST00000278412	6
MYRF	ENSG00000124920	ENST00000278836	3
MYRF	ENSG00000124920	ENST00000265460	1
MYRF	ENSG00000124920	ENST00000327797	2
RELA	ENSG00000173039	ENST00000308639	3
RELA	ENSG00000173039	ENST00000406246	3
TBX10	ENSG00000167800	ENST00000335385	6
YBX3	ENSG00000060138	ENST00000279550	5
YBX3	ENSG00000060138	ENST00000228251	5
SOX5	ENSG00000134532	ENST00000396007	7
SOX5	ENSG00000134532	ENST00000546136	0
SOX5	ENSG00000134532	ENST00000541536	0
SOX5	ENSG00000134532	ENST00000309359	4
CSRNP2	ENSG00000110925	ENST00000552899	0
CSRNP2	ENSG00000110925	ENST00000228515	2
CSRNP2	ENSG00000110925	ENST00000546935	2
CSRNP2	ENSG00000110925	ENST00000548981	2
TFCP2	ENSG00000135457	ENST00000257915	3
TFCP2	ENSG00000135457	ENST00000548115	3
TFCP2	ENSG00000135457	ENST00000307660	2
STAT2	ENSG00000170581	ENST00000314128	5
STAT6	ENSG00000166888	ENST00000543873	2
STAT6	ENSG00000166888	ENST00000557635	3
STAT6	ENSG00000166888	ENST00000555849	2
STAT6	ENSG00000166888	ENST00000553397	5
STAT6	ENSG00000166888	ENST00000454075	4
STAT6	ENSG00000166888	ENST00000553275	4
STAT6	ENSG00000166888	ENST00000300134	4
STAT6	ENSG00000166888	ENST00000556155	3
STAT6	ENSG00000166888	ENST00000553499	1
HMGA2	ENSG00000149948	ENST00000403681	5
HMGA2	ENSG00000149948	ENST00000354636	5
NFYB	ENSG00000120837	ENST00000551727	0
NFYB	ENSG00000120837	ENST00000240055	2
TBX5	ENSG00000089225	ENST00000405440	2
TBX5	ENSG00000089225	ENST00000349716	1
TBX5	ENSG00000089225	ENST00000310346	1
TBX3	ENSG00000135111	ENST00000257566	4
TBX3	ENSG00000135111	ENST00000349155	4
PSPC1	ENSG00000121390	ENST00000338910	3
PSPC1	ENSG00000121390	ENST00000427943	3
RFXAP	ENSG00000133111	ENST00000255476	2
SMAD9	ENSG00000120693	ENST00000399275	1
SMAD9	ENSG00000120693	ENST00000350148	5
SMAD9	ENSG00000120693	ENST00000379826	5
SOX21	ENSG00000125285	ENST00000376945	1
SOX1	ENSG00000182968	ENST00000330949	1
TOX4	ENSG00000092203	ENST00000405508	1
TOX4	ENSG00000092203	ENST00000262709	2
TOX4	ENSG00000092203	ENST00000448790	3
NFATC4	ENSG00000100968	ENST00000413692	4
NFATC4	ENSG00000100968	ENST00000554591	4
NFATC4	ENSG00000100968	ENST00000555590	0
NFATC4	ENSG00000100968	ENST00000539237	0
NFATC4	ENSG00000100968	ENST00000556279	0
NFATC4	ENSG00000100968	ENST00000553469	0
NFATC4	ENSG00000100968	ENST00000554050	4
NFATC4	ENSG00000100968	ENST00000554903	5
NFATC4	ENSG00000100968	ENST00000250373	5
NFATC4	ENSG00000100968	ENST00000553708	4
NFATC4	ENSG00000100968	ENST00000553879	1
NFATC4	ENSG00000100968	ENST00000554344	1
NFATC4	ENSG00000100968	ENST00000555453	1
NFATC4	ENSG00000100968	ENST00000554473	3
NFATC4	ENSG00000100968	ENST00000557767	0
NFKBIA	ENSG00000100906	ENST00000216797	6
TBPL2	ENSG00000182521	ENST00000247219	6
MGA	ENSG00000174197	ENST00000563576	2
MGA	ENSG00000174197	ENST00000566718	0
MGA	ENSG00000174197	ENST00000566586	2
MGA	ENSG00000174197	ENST00000570161	1
SMAD6	ENSG00000137834	ENST00000288840	4
SMAD6	ENSG00000137834	ENST00000457357	4
SMAD6	ENSG00000137834	ENST00000338426	1
SMAD3	ENSG00000166949	ENST00000327367	2
HMG20A	ENSG00000140382	ENST00000560498	1
HMG20A	ENSG00000140382	ENST00000336216	3
HMG20A	ENSG00000140382	ENST00000381714	3
HMG20A	ENSG00000140382	ENST00000559099	2
HMG20A	ENSG00000140382	ENST00000560867	2
MEF2A	ENSG00000068305	ENST00000453228	6
MEF2A	ENSG00000068305	ENST00000560493	7
MEF2A	ENSG00000068305	ENST00000354410	5
MEF2A	ENSG00000068305	ENST00000558812	1
MEF2A	ENSG00000068305	ENST00000557785	0
MEF2A	ENSG00000068305	ENST00000558049	0
MEF2A	ENSG00000068305	ENST00000449277	0
MEF2A	ENSG00000068305	ENST00000557942	0
MEF2A	ENSG00000068305	ENST00000559903	2
SOX8	ENSG00000005513	ENST00000293894	4
TBX6	ENSG00000149922	ENST00000279386	2
TBX6	ENSG00000149922	ENST00000395224	2
TOX3	ENSG00000103460	ENST00000219746	4
TOX3	ENSG00000103460	ENST00000407228	1
NFATC3	ENSG00000072736	ENST00000349223	2
NFATC3	ENSG00000072736	ENST00000346183	3
NFAT5	ENSG00000102908	ENST00000432919	6
NFAT5	ENSG00000102908	ENST00000354436	6
NFAT5	ENSG00000102908	ENST00000393742	3
TCF25	ENSG00000141002	ENST00000263346	6
TCF25	ENSG00000141002	ENST00000263347	2
YBX2	ENSG00000006047	ENST00000007699	1
SOX15	ENSG00000129194	ENST00000538513	3
SOX15	ENSG00000129194	ENST00000250055	3
TP53	ENSG00000141510	ENST00000508793	4
TP53	ENSG00000141510	ENST00000503591	2
TP53	ENSG00000141510	ENST00000455263	2
TP53	ENSG00000141510	ENST00000445888	2
TP53	ENSG00000141510	ENST00000269305	2
SMARCE1	ENSG00000073584	ENST00000544009	0
SMARCE1	ENSG00000073584	ENST00000582955	1
SMARCE1	ENSG00000073584	ENST00000348513	1
STAT5B	ENSG00000173757	ENST00000293328	3
STAT5B	ENSG00000173757	ENST00000415845	2
STAT5A	ENSG00000126561	ENST00000345506	0
STAT5A	ENSG00000126561	ENST00000590949	0
STAT5A	ENSG00000126561	ENST00000452307	0
STAT5A	ENSG00000126561	ENST00000444283	0
STAT3	ENSG00000168610	ENST00000404395	5
STAT3	ENSG00000168610	ENST00000588969	5
STAT3	ENSG00000168610	ENST00000264657	4
UBTF	ENSG00000108312	ENST00000526094	1
UBTF	ENSG00000108312	ENST00000533177	3
UBTF	ENSG00000108312	ENST00000436088	2
UBTF	ENSG00000108312	ENST00000393606	2
UBTF	ENSG00000108312	ENST00000343638	1
UBTF	ENSG00000108312	ENST00000302904	3
TBX21	ENSG00000073861	ENST00000177694	1
TBX4	ENSG00000121075	ENST00000393853	0
TBX4	ENSG00000121075	ENST00000240335	3
SOX9	ENSG00000125398	ENST00000245479	1
SMAD2	ENSG00000175387	ENST00000585978	3
SMAD2	ENSG00000175387	ENST00000587421	1
SMAD2	ENSG00000175387	ENST00000262160	0
SMAD2	ENSG00000175387	ENST00000587269	0
SMAD2	ENSG00000175387	ENST00000586514	3
SMAD2	ENSG00000175387	ENST00000591214	3
SMAD2	ENSG00000175387	ENST00000589877	4
SMAD2	ENSG00000175387	ENST00000402690	5
SMAD2	ENSG00000175387	ENST00000356825	5
SMAD7	ENSG00000101665	ENST00000586093	0
SMAD7	ENSG00000101665	ENST00000591805	1
SMAD7	ENSG00000101665	ENST00000262158	5
SMAD4	ENSG00000141646	ENST00000452201	0
SMAD4	ENSG00000141646	ENST00000588860	5
SMAD4	ENSG00000141646	ENST00000398417	0
SMAD4	ENSG00000141646	ENST00000589076	1
SMAD4	ENSG00000141646	ENST00000590061	1
SMAD4	ENSG00000141646	ENST00000589941	2
NFATC1	ENSG00000131196	ENST00000253506	7
NFATC1	ENSG00000131196	ENST00000591814	7
NFATC1	ENSG00000131196	ENST00000397790	7
NFATC1	ENSG00000131196	ENST00000427363	6
NFATC1	ENSG00000131196	ENST00000318065	8
NFATC1	ENSG00000131196	ENST00000545796	8
NFATC1	ENSG00000131196	ENST00000592223	8
NFATC1	ENSG00000131196	ENST00000329101	8
NFIC	ENSG00000141905	ENST00000589123	2
NFIC	ENSG00000141905	ENST00000346156	2
NFIC	ENSG00000141905	ENST00000395111	1
NFIC	ENSG00000141905	ENST00000341919	4
NFIC	ENSG00000141905	ENST00000443272	3
HMG20B	ENSG00000064961	ENST00000416526	1
HMG20B	ENSG00000064961	ENST00000333651	1
HMG20B	ENSG00000064961	ENST00000453933	1
NFIX	ENSG00000008441	ENST00000397661	2
NFIX	ENSG00000008441	ENST00000585575	1
NFIX	ENSG00000008441	ENST00000587260	2
NFIX	ENSG00000008441	ENST00000358552	1
MEF2B	ENSG00000213999	ENST00000424583	3
MEF2B	ENSG00000213999	ENST00000162023	7
RFXANK	ENSG00000064490	ENST00000353145	4
RFXANK	ENSG00000064490	ENST00000421262	4
RFXANK	ENSG00000064490	ENST00000303088	4
RFXANK	ENSG00000064490	ENST00000456252	5
MEF2B	ENSG00000213999	ENST00000602424	3
RFXANK	ENSG00000064490	ENST00000407360	7
RFXANK	ENSG00000064490	ENST00000540981	6
NFKBID	ENSG00000167604	ENST00000340950	3
NFKBID	ENSG00000167604	ENST00000396901	5
NFKBID	ENSG00000167604	ENST00000352614	4
NFKBID	ENSG00000167604	ENST00000606253	4
NFKBIB	ENSG00000104825	ENST00000572515	0
NFKBIB	ENSG00000104825	ENST00000392079	0
NFKBIB	ENSG00000104825	ENST00000313582	0
CIC	ENSG00000079432	ENST00000575354	3
BCL3	ENSG00000069399	ENST00000164227	1
RELB	ENSG00000104856	ENST00000221452	4
RELB	ENSG00000104856	ENST00000540120	3
PPP1R13L	ENSG00000104881	ENST00000360957	3
PPP1R13L	ENSG00000104881	ENST00000592134	3
PPP1R13L	ENSG00000104881	ENST00000593226	6
PPP1R13L	ENSG00000104881	ENST00000418234	6
SOX12	ENSG00000177732	ENST00000544632	2
SOX12	ENSG00000177732	ENST00000342665	1
EBF4	ENSG00000088881	ENST00000380648	1
TOX2	ENSG00000124191	ENST00000341197	4
TOX2	ENSG00000124191	ENST00000423191	1
TOX2	ENSG00000124191	ENST00000372999	1
TOX2	ENSG00000124191	ENST00000358131	4
RBPJL	ENSG00000124232	ENST00000372743	3
ZNFX1	ENSG00000124201	ENST00000455070	1
ZNFX1	ENSG00000124201	ENST00000371744	7
ZNFX1	ENSG00000124201	ENST00000371752	9
ZNFX1	ENSG00000124201	ENST00000396105	12
ZNFX1	ENSG00000124201	ENST00000371754	13
NFATC2	ENSG00000101096	ENST00000371564	2
NFATC2	ENSG00000101096	ENST00000414705	3
GMEB2	ENSG00000101216	ENST00000370069	2
GMEB2	ENSG00000101216	ENST00000266068	7
GMEB2	ENSG00000101216	ENST00000370077	1
SOX18	ENSG00000203883	ENST00000340356	2
RUNX1	ENSG00000159216	ENST00000344691	2
RUNX1	ENSG00000159216	ENST00000325074	4
RUNX1	ENSG00000159216	ENST00000486278	1
RUNX1	ENSG00000159216	ENST00000416754	1
RUNX1	ENSG00000159216	ENST00000437180	1
RUNX1	ENSG00000159216	ENST00000300305	1
RUNX1	ENSG00000159216	ENST00000475045	3
AIRE	ENSG00000160224	ENST00000291582	4
AIRE	ENSG00000160224	ENST00000355347	4
TBX1	ENSG00000184058	ENST00000329705	1
HMGXB4	ENSG00000100281	ENST00000444518	1
HMGXB4	ENSG00000100281	ENST00000216106	1
SOX10	ENSG00000100146	ENST00000427770	1
SOX10	ENSG00000100146	ENST00000396884	2
SOX10	ENSG00000100146	ENST00000360880	3
PHF5A	ENSG00000100410	ENST00000216252	0
NONO	ENSG00000147140	ENST00000535149	0
NONO	ENSG00000147140	ENST00000276079	0
NONO	ENSG00000147140	ENST00000373856	0
NONO	ENSG00000147140	ENST00000373841	0
NONO	ENSG00000147140	ENST00000420903	0
NONO	ENSG00000147140	ENST00000413858	0
NONO	ENSG00000147140	ENST00000450092	0
NONO	ENSG00000147140	ENST00000454976	0
NONO	ENSG00000147140	ENST00000418921	0
TAF1	ENSG00000147133	ENST00000449580	3
TAF1	ENSG00000147133	ENST00000276072	3
TBX22	ENSG00000122145	ENST00000373296	1
TBX22	ENSG00000122145	ENST00000373294	2
TBX22	ENSG00000122145	ENST00000373291	2
SOX3	ENSG00000134595	ENST00000370536	0
SRY	ENSG00000184895	ENST00000525526	0
SRY	ENSG00000184895	ENST00000383070	0

## Sheet: Chr_mod
HGNC Gene Name	Ensembl Gene ID	Ensembl Transcript ID	SNP count				unique only		Genes	167	Transcripts	533
CHD5	ENSG00000116254	ENST00000262450	4				CHD5
PHF13	ENSG00000116273	ENST00000377648	3				PHF13
PADI4	ENSG00000159339	ENST00000375453	4				PADI4
PADI4	ENSG00000159339	ENST00000375448	4				KDM1A
KDM1A	ENSG00000004487	ENST00000356634	3				ARID1A
KDM1A	ENSG00000004487	ENST00000542151	3				HDAC1
ARID1A	ENSG00000117713	ENST00000324856	0				CITED4
ARID1A	ENSG00000117713	ENST00000540690	0				KDM4A
HDAC1	ENSG00000116478	ENST00000373548	4				BRDT
HDAC1	ENSG00000116478	ENST00000373541	0				MTF2
CITED4	ENSG00000179862	ENST00000372638	7				SETDB1
KDM4A	ENSG00000066135	ENST00000372396	0				VPS72
BRDT	ENSG00000137948	ENST00000362005	3				KDM5B
BRDT	ENSG00000137948	ENST00000423434	3				ARID4B
BRDT	ENSG00000137948	ENST00000440509	4				BRE
BRDT	ENSG00000137948	ENST00000449584	5				MTA3
BRDT	ENSG00000137948	ENST00000355011	5				ARID5A
BRDT	ENSG00000137948	ENST00000450792	5				EPC2
BRDT	ENSG00000137948	ENST00000457265	5				BAZ2B
BRDT	ENSG00000137948	ENST00000402388	3				TLK1
MTF2	ENSG00000143033	ENST00000545708	3				HAT1
MTF2	ENSG00000143033	ENST00000370298	3				SMARCAL1
MTF2	ENSG00000143033	ENST00000370303	3				HDAC4
SETDB1	ENSG00000143379	ENST00000525956	0				BRPF1
SETDB1	ENSG00000143379	ENST00000271640	0				HDAC11
SETDB1	ENSG00000143379	ENST00000448029	0				KAT2B
SETDB1	ENSG00000143379	ENST00000368962	0				SMARCC1
SETDB1	ENSG00000143379	ENST00000368969	0				SFMBT1
SETDB1	ENSG00000143379	ENST00000498193	0				HLTF
VPS72	ENSG00000163159	ENST00000368892	1				WHSC1
KDM5B	ENSG00000117139	ENST00000367264	5				UTP3
KDM5B	ENSG00000117139	ENST00000367265	2				FAM175A
ARID4B	ENSG00000054267	ENST00000366603	1				SMARCAD1
ARID4B	ENSG00000054267	ENST00000418304	3				SETD7
ARID4B	ENSG00000054267	ENST00000264183	3				SMARCA5
ARID4B	ENSG00000054267	ENST00000349213	3				ING2
BRE	ENSG00000158019	ENST00000436924	2				BRD9
BRE	ENSG00000158019	ENST00000344773	0				CHD1
BRE	ENSG00000158019	ENST00000379624	0				H2AFY
BRE	ENSG00000158019	ENST00000342045	0				BRD8
BRE	ENSG00000158019	ENST00000379632	0				KDM3B
MTA3	ENSG00000057935	ENST00000407270	3				HDAC3
MTA3	ENSG00000057935	ENST00000405094	4				NR3C1
ARID5A	ENSG00000196843	ENST00000357485	2				CDYL
EPC2	ENSG00000135999	ENST00000258484	1				JARID2
BAZ2B	ENSG00000123636	ENST00000437839	3				DEK
BAZ2B	ENSG00000123636	ENST00000355831	1				BAG6
BAZ2B	ENSG00000123636	ENST00000392783	1				BRD2
TLK1	ENSG00000198586	ENST00000431350	5				PHF1
TLK1	ENSG00000198586	ENST00000442919	3				BRPF3
TLK1	ENSG00000198586	ENST00000521943	0				HMGN3
HAT1	ENSG00000128708	ENST00000392584	0				HDAC2
HAT1	ENSG00000128708	ENST00000264108	0				ASF1A
SMARCAL1	ENSG00000138375	ENST00000430374	3				L3MBTL3
SMARCAL1	ENSG00000138375	ENST00000444508	5				EYA4
SMARCAL1	ENSG00000138375	ENST00000425815	5				CITED2
SMARCAL1	ENSG00000138375	ENST00000358207	5				ARID1B
SMARCAL1	ENSG00000138375	ENST00000434435	6				HDAC9
HDAC4	ENSG00000068024	ENST00000543185	5				IKZF1
HDAC4	ENSG00000068024	ENST00000541256	8				BAZ1B
HDAC4	ENSG00000068024	ENST00000345617	0				WBSCR22
HDAC4	ENSG00000068024	ENST00000544989	2				LRWD1
BRPF1	ENSG00000156983	ENST00000383829	4				DNAJC2
BRPF1	ENSG00000156983	ENST00000302054	4				EZH2
BRPF1	ENSG00000156983	ENST00000420291	3				SMARCD3
BRPF1	ENSG00000156983	ENST00000426583	2				CHD7
BRPF1	ENSG00000156983	ENST00000457855	3				CHRAC1
HDAC11	ENSG00000163517	ENST00000295757	2				SMARCA2
HDAC11	ENSG00000163517	ENST00000446613	2				SPIN1
HDAC11	ENSG00000163517	ENST00000522202	2				PHF19
KAT2B	ENSG00000114166	ENST00000263754	5				GFI1B
SMARCC1	ENSG00000173473	ENST00000254480	1				BRD3
SFMBT1	ENSG00000163935	ENST00000394750	1				WDR5
SFMBT1	ENSG00000163935	ENST00000482396	7				EHMT1
SFMBT1	ENSG00000163935	ENST00000358080	7				ZMYND11
SFMBT1	ENSG00000163935	ENST00000394752	7				TAF3
SFMBT1	ENSG00000163935	ENST00000497586	4				ARID5B
SFMBT1	ENSG00000163935	ENST00000483069	4				JMJD1C
HLTF	ENSG00000071794	ENST00000392912	3				SIRT1
HLTF	ENSG00000071794	ENST00000310053	3				TET1
HLTF	ENSG00000071794	ENST00000494055	3				H2AFY2
WHSC1	ENSG00000109685	ENST00000508803	0				HELLS
WHSC1	ENSG00000109685	ENST00000507820	0				TAF5
WHSC1	ENSG00000109685	ENST00000514045	0				RRP8
WHSC1	ENSG00000109685	ENST00000515806	2				RAG2
WHSC1	ENSG00000109685	ENST00000436793	3				PHF21A
WHSC1	ENSG00000109685	ENST00000420906	3				KDM2A
WHSC1	ENSG00000109685	ENST00000503128	3				C11orf30
WHSC1	ENSG00000109685	ENST00000509115	1				KDM4E
WHSC1	ENSG00000109685	ENST00000398261	1				KDM5A
WHSC1	ENSG00000109685	ENST00000382888	1				CHD4
UTP3	ENSG00000132467	ENST00000254803	2				DPPA3
FAM175A	ENSG00000163322	ENST00000321945	3				AEBP2
SMARCAD1	ENSG00000163104	ENST00000359052	1				ARID2
SMARCAD1	ENSG00000163104	ENST00000457823	1				HDAC7
SMARCAD1	ENSG00000163104	ENST00000354268	2				SMARCD1
SETD7	ENSG00000145391	ENST00000274031	2				SMARCC2
SMARCA5	ENSG00000153147	ENST00000283131	0				BAZ2A
ING2	ENSG00000168556	ENST00000302327	4				TDG
ING2	ENSG00000168556	ENST00000434682	3				RCBTB1
BRD9	ENSG00000028310	ENST00000323510	8				TDRD3
BRD9	ENSG00000028310	ENST00000435709	5				ING1
BRD9	ENSG00000028310	ENST00000467963	9				CHD8
CHD1	ENSG00000153922	ENST00000284049	2				BAZ1A
H2AFY	ENSG00000113648	ENST00000312469	4				ARID4A
H2AFY	ENSG00000113648	ENST00000511689	5				DPF3
BRD8	ENSG00000112983	ENST00000454473	3				ARID3B
BRD8	ENSG00000112983	ENST00000455658	3				CHD2
BRD8	ENSG00000112983	ENST00000230901	3				CREBBP
BRD8	ENSG00000112983	ENST00000411594	3				UBN1
BRD8	ENSG00000112983	ENST00000254900	3				KAT8
KDM3B	ENSG00000120733	ENST00000314358	4				BRD7
KDM3B	ENSG00000120733	ENST00000394866	1				CHD9
KDM3B	ENSG00000120733	ENST00000542866	0				RBL2
HDAC3	ENSG00000171720	ENST00000305264	2				CTCF
NR3C1	ENSG00000113580	ENST00000424646	7				BANP
NR3C1	ENSG00000113580	ENST00000502500	2				C17orf49
NR3C1	ENSG00000113580	ENST00000510170	7				KDM6B
NR3C1	ENSG00000113580	ENST00000415690	12				CHD3
NR3C1	ENSG00000113580	ENST00000231509	7				NCOR1
NR3C1	ENSG00000113580	ENST00000394464	7				SMARCE1
NR3C1	ENSG00000113580	ENST00000508760	4				KAT2A
NR3C1	ENSG00000113580	ENST00000394466	6				EZH1
NR3C1	ENSG00000113580	ENST00000416954	9				HDAC5
NR3C1	ENSG00000113580	ENST00000503201	7				KAT7
NR3C1	ENSG00000113580	ENST00000502892	5				MBTD1
NR3C1	ENSG00000113580	ENST00000514699	5				TLK2
NR3C1	ENSG00000113580	ENST00000504572	5				SMARCD2
NR3C1	ENSG00000113580	ENST00000343796	6				CBX2
CDYL	ENSG00000153046	ENST00000328908	5				CBX4
CDYL	ENSG00000153046	ENST00000397588	0				RAC3
CDYL	ENSG00000153046	ENST00000449732	4				L3MBTL4
CDYL	ENSG00000153046	ENST00000343762	3				ARID3A
JARID2	ENSG00000008083	ENST00000341776	1				DAPK3
JARID2	ENSG00000008083	ENST00000397311	2				SIRT6
JARID2	ENSG00000008083	ENST00000541660	3				KDM4B
DEK	ENSG00000124795	ENST00000244776	0				DNMT1
DEK	ENSG00000124795	ENST00000397239	1				SMARCA4
BAG6	ENSG00000204463	ENST00000422948	2				ASF1B
BAG6	ENSG00000204463	ENST00000441793	1				BRD4
BAG6	ENSG00000204463	ENST00000438149	0				BABAM1
BAG6	ENSG00000204463	ENST00000453833	3				FOXA3
BAG6	ENSG00000204463	ENST00000434444	4				FOXA2
BAG6	ENSG00000204463	ENST00000433828	3				RBL1
BAG6	ENSG00000204463	ENST00000456286	3				CHD6
BAG6	ENSG00000204463	ENST00000454165	4				L3MBTL1
BAG6	ENSG00000204463	ENST00000428326	4				SS18L1
BAG6	ENSG00000204463	ENST00000452994	4				MRGBP
BAG6	ENSG00000204463	ENST00000424176	3				HIRA
BAG6	ENSG00000204463	ENST00000456622	2				SMARCB1
BAG6	ENSG00000204463	ENST00000435080	2				CABIN1
BAG6	ENSG00000204463	ENST00000375976	2				CBX6
BAG6	ENSG00000204463	ENST00000441054	2				CBX7
BAG6	ENSG00000204463	ENST00000451898	2				EP300
BAG6	ENSG00000204463	ENST00000439687	2				L3MBTL2
BAG6	ENSG00000204463	ENST00000424480	2				HDAC10
BAG6	ENSG00000204463	ENST00000437771	2				HDAC6
BAG6	ENSG00000204463	ENST00000404765	2				TSPYL2
BAG6	ENSG00000204463	ENST00000211379	2				KDM5C
BRD2	ENSG00000204256	ENST00000374825	7				PHF8
BRD2	ENSG00000204256	ENST00000374831	7				TAF1
BRD2	ENSG00000204256	ENST00000395289	7				CITED1
BRD2	ENSG00000204256	ENST00000443797	8				HDAC8
BRD2	ENSG00000204256	ENST00000607833	3				HMGN5
BRD2	ENSG00000204256	ENST00000449085	7				MORF4L2
PHF1	ENSG00000112511	ENST00000427004	1				SMARCA1
PHF1	ENSG00000112511	ENST00000428274	2				BCORL1
PHF1	ENSG00000112511	ENST00000374512	1
BRPF3	ENSG00000096070	ENST00000357641	6
BRPF3	ENSG00000096070	ENST00000446974	3
BRPF3	ENSG00000096070	ENST00000454960	3
BRPF3	ENSG00000096070	ENST00000543502	1
HMGN3	ENSG00000118418	ENST00000344726	2
HDAC2	ENSG00000196591	ENST00000398283	3
HDAC2	ENSG00000196591	ENST00000519065	3
ASF1A	ENSG00000111875	ENST00000229595	3
L3MBTL3	ENSG00000198945	ENST00000529410	10
L3MBTL3	ENSG00000198945	ENST00000533560	0
L3MBTL3	ENSG00000198945	ENST00000528385	0
L3MBTL3	ENSG00000198945	ENST00000368139	3
L3MBTL3	ENSG00000198945	ENST00000526019	3
L3MBTL3	ENSG00000198945	ENST00000368136	3
EYA4	ENSG00000112319	ENST00000367895	5
EYA4	ENSG00000112319	ENST00000355167	5
EYA4	ENSG00000112319	ENST00000355286	5
CITED2	ENSG00000164442	ENST00000537332	6
CITED2	ENSG00000164442	ENST00000536159	5
CITED2	ENSG00000164442	ENST00000367651	3
ARID1B	ENSG00000049618	ENST00000350026	2
ARID1B	ENSG00000049618	ENST00000367148	2
ARID1B	ENSG00000049618	ENST00000275248	2
HDAC9	ENSG00000048052	ENST00000433709	4
HDAC9	ENSG00000048052	ENST00000413509	2
HDAC9	ENSG00000048052	ENST00000413380	1
HDAC9	ENSG00000048052	ENST00000405010	0
HDAC9	ENSG00000048052	ENST00000401921	0
HDAC9	ENSG00000048052	ENST00000432645	0
IKZF1	ENSG00000185811	ENST00000359197	4
IKZF1	ENSG00000185811	ENST00000438033	2
IKZF1	ENSG00000185811	ENST00000439701	2
BAZ1B	ENSG00000009954	ENST00000339594	2
BAZ1B	ENSG00000009954	ENST00000404251	2
WBSCR22	ENSG00000071462	ENST00000265758	7
WBSCR22	ENSG00000071462	ENST00000423166	8
LRWD1	ENSG00000161036	ENST00000292616	0
DNAJC2	ENSG00000105821	ENST00000249270	2
DNAJC2	ENSG00000105821	ENST00000379263	1
EZH2	ENSG00000106462	ENST00000460911	3
EZH2	ENSG00000106462	ENST00000350995	3
EZH2	ENSG00000106462	ENST00000320356	3
EZH2	ENSG00000106462	ENST00000536783	3
SMARCD3	ENSG00000082014	ENST00000262188	2
SMARCD3	ENSG00000082014	ENST00000356800	1
SMARCD3	ENSG00000082014	ENST00000392811	3
SMARCD3	ENSG00000082014	ENST00000491651	3
CHD7	ENSG00000171316	ENST00000423902	3
CHD7	ENSG00000171316	ENST00000526846	2
CHRAC1	ENSG00000104472	ENST00000220913	6
SMARCA2	ENSG00000080503	ENST00000349721	2
SMARCA2	ENSG00000080503	ENST00000450198	2
SMARCA2	ENSG00000080503	ENST00000457226	1
SMARCA2	ENSG00000080503	ENST00000439732	3
SMARCA2	ENSG00000080503	ENST00000382203	3
SMARCA2	ENSG00000080503	ENST00000382194	7
SMARCA2	ENSG00000080503	ENST00000452193	4
SMARCA2	ENSG00000080503	ENST00000324954	2
SMARCA2	ENSG00000080503	ENST00000423555	2
SMARCA2	ENSG00000080503	ENST00000382186	2
SMARCA2	ENSG00000080503	ENST00000417599	2
SMARCA2	ENSG00000080503	ENST00000382185	2
SMARCA2	ENSG00000080503	ENST00000382183	2
SMARCA2	ENSG00000080503	ENST00000416751	2
SPIN1	ENSG00000106723	ENST00000375859	3
SPIN1	ENSG00000106723	ENST00000541629	3
PHF19	ENSG00000119403	ENST00000419155	5
PHF19	ENSG00000119403	ENST00000456291	3
PHF19	ENSG00000119403	ENST00000436309	5
PHF19	ENSG00000119403	ENST00000312189	3
PHF19	ENSG00000119403	ENST00000373896	1
GFI1B	ENSG00000165702	ENST00000372124	5
GFI1B	ENSG00000165702	ENST00000339463	5
GFI1B	ENSG00000165702	ENST00000450530	4
GFI1B	ENSG00000165702	ENST00000372123	5
BRD3	ENSG00000169925	ENST00000433041	10
BRD3	ENSG00000169925	ENST00000371842	3
BRD3	ENSG00000169925	ENST00000357885	5
BRD3	ENSG00000169925	ENST00000303407	5
BRD3	ENSG00000169925	ENST00000371834	10
WDR5	ENSG00000196363	ENST00000608937	4
WDR5	ENSG00000196363	ENST00000608739	3
WDR5	ENSG00000196363	ENST00000358625	5
WDR5	ENSG00000196363	ENST00000425041	9
EHMT1	ENSG00000181090	ENST00000334856	2
EHMT1	ENSG00000181090	ENST00000460843	2
ZMYND11	ENSG00000015171	ENST00000381602	1
ZMYND11	ENSG00000015171	ENST00000509513	1
ZMYND11	ENSG00000015171	ENST00000397959	1
ZMYND11	ENSG00000015171	ENST00000381591	1
ZMYND11	ENSG00000015171	ENST00000381607	1
ZMYND11	ENSG00000015171	ENST00000602682	2
ZMYND11	ENSG00000015171	ENST00000381604	2
ZMYND11	ENSG00000015171	ENST00000558098	2
ZMYND11	ENSG00000015171	ENST00000545619	4
ZMYND11	ENSG00000015171	ENST00000535374	4
TAF3	ENSG00000165632	ENST00000344293	3
ARID5B	ENSG00000150347	ENST00000279873	2
ARID5B	ENSG00000150347	ENST00000309334	5
JMJD1C	ENSG00000171988	ENST00000542921	1
JMJD1C	ENSG00000171988	ENST00000402544	1
JMJD1C	ENSG00000171988	ENST00000399262	3
JMJD1C	ENSG00000171988	ENST00000399251	3
SIRT1	ENSG00000096717	ENST00000212015	4
SIRT1	ENSG00000096717	ENST00000432464	2
TET1	ENSG00000138336	ENST00000373644	4
H2AFY2	ENSG00000099284	ENST00000373255	1
HELLS	ENSG00000119969	ENST00000419900	2
HELLS	ENSG00000119969	ENST00000394044	2
HELLS	ENSG00000119969	ENST00000371332	3
TAF5	ENSG00000148835	ENST00000351396	4
RRP8	ENSG00000132275	ENST00000254605	5
RAG2	ENSG00000175097	ENST00000529083	3
RAG2	ENSG00000175097	ENST00000311485	3
PHF21A	ENSG00000135365	ENST00000532010	3
PHF21A	ENSG00000135365	ENST00000525438	3
PHF21A	ENSG00000135365	ENST00000533757	2
PHF21A	ENSG00000135365	ENST00000527782	2
PHF21A	ENSG00000135365	ENST00000418153	0
PHF21A	ENSG00000135365	ENST00000529734	0
PHF21A	ENSG00000135365	ENST00000323180	0
PHF21A	ENSG00000135365	ENST00000257821	1
KDM2A	ENSG00000173120	ENST00000398645	1
KDM2A	ENSG00000173120	ENST00000529006	0
KDM2A	ENSG00000173120	ENST00000308783	0
C11orf30	ENSG00000158636	ENST00000334736	2
C11orf30	ENSG00000158636	ENST00000529032	3
KDM4E	ENSG00000235268	ENST00000450979	3
KDM5A	ENSG00000073614	ENST00000399788	5
CHD4	ENSG00000111642	ENST00000544484	2
CHD4	ENSG00000111642	ENST00000309577	2
CHD4	ENSG00000111642	ENST00000544040	2
DPPA3	ENSG00000187569	ENST00000345088	1
AEBP2	ENSG00000139154	ENST00000398864	3
AEBP2	ENSG00000139154	ENST00000266508	3
AEBP2	ENSG00000139154	ENST00000360995	2
ARID2	ENSG00000189079	ENST00000334344	1
HDAC7	ENSG00000061273	ENST00000380610	0
HDAC7	ENSG00000061273	ENST00000080059	4
HDAC7	ENSG00000061273	ENST00000354334	5
HDAC7	ENSG00000061273	ENST00000552960	5
HDAC7	ENSG00000061273	ENST00000417902	5
SMARCD1	ENSG00000066117	ENST00000394963	4
SMARCD1	ENSG00000066117	ENST00000381513	1
SMARCC2	ENSG00000139613	ENST00000347471	3
SMARCC2	ENSG00000139613	ENST00000394023	3
BAZ2A	ENSG00000076108	ENST00000549787	1
BAZ2A	ENSG00000076108	ENST00000179765	1
TDG	ENSG00000139372	ENST00000392872	5
TDG	ENSG00000139372	ENST00000542036	5
RCBTB1	ENSG00000136144	ENST00000258646	5
RCBTB1	ENSG00000136144	ENST00000546015	2
RCBTB1	ENSG00000136144	ENST00000378302	2
TDRD3	ENSG00000083544	ENST00000196169	4
TDRD3	ENSG00000083544	ENST00000377894	2
TDRD3	ENSG00000083544	ENST00000535286	3
TDRD3	ENSG00000083544	ENST00000377881	2
TDRD3	ENSG00000083544	ENST00000377882	2
ING1	ENSG00000153487	ENST00000338450	2
ING1	ENSG00000153487	ENST00000333219	2
ING1	ENSG00000153487	ENST00000375775	2
ING1	ENSG00000153487	ENST00000375774	3
CHD8	ENSG00000100888	ENST00000399982	2
CHD8	ENSG00000100888	ENST00000430710	3
CHD8	ENSG00000100888	ENST00000557364	3
BAZ1A	ENSG00000198604	ENST00000382422	3
BAZ1A	ENSG00000198604	ENST00000358716	2
ARID4A	ENSG00000032219	ENST00000355431	1
ARID4A	ENSG00000032219	ENST00000348476	0
ARID4A	ENSG00000032219	ENST00000395168	0
ARID4A	ENSG00000032219	ENST00000424658	3
ARID4A	ENSG00000032219	ENST00000431317	4
DPF3	ENSG00000205683	ENST00000541685	5
ARID3B	ENSG00000179361	ENST00000346246	2
CHD2	ENSG00000173575	ENST00000556722	2
CHD2	ENSG00000173575	ENST00000420239	3
CREBBP	ENSG00000005339	ENST00000382070	1
CREBBP	ENSG00000005339	ENST00000262367	6
UBN1	ENSG00000118900	ENST00000262376	3
UBN1	ENSG00000118900	ENST00000545171	1
UBN1	ENSG00000118900	ENST00000396658	7
KAT8	ENSG00000103510	ENST00000543774	3
KAT8	ENSG00000103510	ENST00000448516	5
BRD7	ENSG00000166164	ENST00000394689	5
BRD7	ENSG00000166164	ENST00000394688	5
CHD9	ENSG00000177200	ENST00000447540	2
CHD9	ENSG00000177200	ENST00000565832	1
CHD9	ENSG00000177200	ENST00000564845	6
CHD9	ENSG00000177200	ENST00000563410	6
CHD9	ENSG00000177200	ENST00000398510	3
RBL2	ENSG00000103479	ENST00000262133	4
RBL2	ENSG00000103479	ENST00000544545	2
CTCF	ENSG00000102974	ENST00000264010	0
BANP	ENSG00000172530	ENST00000423252	5
BANP	ENSG00000172530	ENST00000439677	5
BANP	ENSG00000172530	ENST00000393208	5
BANP	ENSG00000172530	ENST00000412691	5
BANP	ENSG00000172530	ENST00000355022	4
BANP	ENSG00000172530	ENST00000436970	3
BANP	ENSG00000172530	ENST00000436274	8
BANP	ENSG00000172530	ENST00000456902	6
BANP	ENSG00000172530	ENST00000393207	16
C17orf49	ENSG00000258315	ENST00000546495	7
C17orf49	ENSG00000258315	ENST00000552402	9
C17orf49	ENSG00000258315	ENST00000439424	9
KDM6B	ENSG00000132510	ENST00000254846	0
KDM6B	ENSG00000132510	ENST00000448097	0
CHD3	ENSG00000170004	ENST00000358181	1
CHD3	ENSG00000170004	ENST00000330494	1
NCOR1	ENSG00000141027	ENST00000395857	1
NCOR1	ENSG00000141027	ENST00000395851	1
NCOR1	ENSG00000141027	ENST00000436828	6
NCOR1	ENSG00000141027	ENST00000268712	6
NCOR1	ENSG00000141027	ENST00000430577	0
SMARCE1	ENSG00000073584	ENST00000544009	0
SMARCE1	ENSG00000073584	ENST00000582955	1
SMARCE1	ENSG00000073584	ENST00000348513	1
KAT2A	ENSG00000108773	ENST00000225916	2
EZH1	ENSG00000108799	ENST00000428826	6
EZH1	ENSG00000108799	ENST00000593214	6
EZH1	ENSG00000108799	ENST00000592743	6
EZH1	ENSG00000108799	ENST00000435174	6
HDAC5	ENSG00000108840	ENST00000586802	2
HDAC5	ENSG00000108840	ENST00000225983	3
HDAC5	ENSG00000108840	ENST00000393622	3
KAT7	ENSG00000136504	ENST00000259021	1
KAT7	ENSG00000136504	ENST00000503935	2
MBTD1	ENSG00000011258	ENST00000415868	4
MBTD1	ENSG00000011258	ENST00000376381	3
MBTD1	ENSG00000011258	ENST00000586178	3
TLK2	ENSG00000146872	ENST00000579450	0
TLK2	ENSG00000146872	ENST00000582195	2
TLK2	ENSG00000146872	ENST00000346027	0
TLK2	ENSG00000146872	ENST00000343388	0
TLK2	ENSG00000146872	ENST00000542523	1
SMARCD2	ENSG00000108604	ENST00000323347	2
SMARCD2	ENSG00000108604	ENST00000448276	3
SMARCD2	ENSG00000108604	ENST00000577990	4
CBX2	ENSG00000173894	ENST00000310942	1
CBX2	ENSG00000173894	ENST00000269399	1
CBX4	ENSG00000141582	ENST00000269397	1
RAC3	ENSG00000169750	ENST00000306897	2
L3MBTL4	ENSG00000154655	ENST00000535782	2
L3MBTL4	ENSG00000154655	ENST00000583054	6
L3MBTL4	ENSG00000154655	ENST00000400105	1
L3MBTL4	ENSG00000154655	ENST00000284898	2
ARID3A	ENSG00000116017	ENST00000263620	8
DAPK3	ENSG00000167657	ENST00000301264	3
DAPK3	ENSG00000167657	ENST00000593844	5
DAPK3	ENSG00000167657	ENST00000601824	4
DAPK3	ENSG00000167657	ENST00000545797	2
DAPK3	ENSG00000167657	ENST00000596311	4
SIRT6	ENSG00000077463	ENST00000305232	3
SIRT6	ENSG00000077463	ENST00000381935	4
SIRT6	ENSG00000077463	ENST00000337491	4
KDM4B	ENSG00000127663	ENST00000588337	4
KDM4B	ENSG00000127663	ENST00000159111	4
KDM4B	ENSG00000127663	ENST00000381759	4
DNMT1	ENSG00000130816	ENST00000540357	1
DNMT1	ENSG00000130816	ENST00000340748	1
SMARCA4	ENSG00000127616	ENST00000358026	7
SMARCA4	ENSG00000127616	ENST00000344626	7
SMARCA4	ENSG00000127616	ENST00000541122	6
SMARCA4	ENSG00000127616	ENST00000589677	6
SMARCA4	ENSG00000127616	ENST00000444061	6
SMARCA4	ENSG00000127616	ENST00000590574	1
SMARCA4	ENSG00000127616	ENST00000413806	2
ASF1B	ENSG00000105011	ENST00000263382	1
BRD4	ENSG00000141867	ENST00000263377	0
BRD4	ENSG00000141867	ENST00000594841	0
BRD4	ENSG00000141867	ENST00000601941	0
BRD4	ENSG00000141867	ENST00000360016	1
BABAM1	ENSG00000105393	ENST00000598188	4
BABAM1	ENSG00000105393	ENST00000359435	4
BABAM1	ENSG00000105393	ENST00000599474	3
BABAM1	ENSG00000105393	ENST00000599057	3
BABAM1	ENSG00000105393	ENST00000602066	5
FOXA3	ENSG00000170608	ENST00000302177	6
FOXA2	ENSG00000125798	ENST00000419308	1
FOXA2	ENSG00000125798	ENST00000377115	6
RBL1	ENSG00000080839	ENST00000344359	2
RBL1	ENSG00000080839	ENST00000373664	2
CHD6	ENSG00000124177	ENST00000440697	0
CHD6	ENSG00000124177	ENST00000440647	3
CHD6	ENSG00000124177	ENST00000373222	4
CHD6	ENSG00000124177	ENST00000373233	4
L3MBTL1	ENSG00000185513	ENST00000427442	2
L3MBTL1	ENSG00000185513	ENST00000439769	2
L3MBTL1	ENSG00000185513	ENST00000444063	2
L3MBTL1	ENSG00000185513	ENST00000373134	2
SS18L1	ENSG00000184402	ENST00000421564	4
SS18L1	ENSG00000184402	ENST00000450482	4
SS18L1	ENSG00000184402	ENST00000370848	4
MRGBP	ENSG00000101189	ENST00000370487	1
HIRA	ENSG00000100084	ENST00000340170	2
HIRA	ENSG00000100084	ENST00000263208	3
HIRA	ENSG00000100084	ENST00000546308	1
HIRA	ENSG00000100084	ENST00000541063	1
SMARCB1	ENSG00000099956	ENST00000263121	8
SMARCB1	ENSG00000099956	ENST00000407422	8
CABIN1	ENSG00000099991	ENST00000263119	9
CABIN1	ENSG00000099991	ENST00000398319	9
CBX6	ENSG00000183741	ENST00000407418	2
CBX7	ENSG00000100307	ENST00000216133	4
EP300	ENSG00000100393	ENST00000263253	8
L3MBTL2	ENSG00000100395	ENST00000216237	0
L3MBTL2	ENSG00000100395	ENST00000449635	6
HDAC10	ENSG00000100429	ENST00000349505	2
HDAC10	ENSG00000100429	ENST00000216271	5
HDAC6	ENSG00000094631	ENST00000423941	1
HDAC6	ENSG00000094631	ENST00000438518	1
HDAC6	ENSG00000094631	ENST00000376643	0
HDAC6	ENSG00000094631	ENST00000444343	0
HDAC6	ENSG00000094631	ENST00000376610	1
HDAC6	ENSG00000094631	ENST00000334136	1
HDAC6	ENSG00000094631	ENST00000376619	1
HDAC6	ENSG00000094631	ENST00000413163	1
HDAC6	ENSG00000094631	ENST00000441703	1
HDAC6	ENSG00000094631	ENST00000426196	1
HDAC6	ENSG00000094631	ENST00000443563	1
HDAC6	ENSG00000094631	ENST00000440653	1
TSPYL2	ENSG00000184205	ENST00000375442	0
KDM5C	ENSG00000126012	ENST00000404049	0
KDM5C	ENSG00000126012	ENST00000452825	0
PHF8	ENSG00000172943	ENST00000425862	0
PHF8	ENSG00000172943	ENST00000433120	0
PHF8	ENSG00000172943	ENST00000445025	0
PHF8	ENSG00000172943	ENST00000415025	1
PHF8	ENSG00000172943	ENST00000338154	1
PHF8	ENSG00000172943	ENST00000357988	1
PHF8	ENSG00000172943	ENST00000453905	0
PHF8	ENSG00000172943	ENST00000437224	0
TAF1	ENSG00000147133	ENST00000449580	3
TAF1	ENSG00000147133	ENST00000276072	3
CITED1	ENSG00000125931	ENST00000429794	0
CITED1	ENSG00000125931	ENST00000427412	0
CITED1	ENSG00000125931	ENST00000450875	0
CITED1	ENSG00000125931	ENST00000417400	0
CITED1	ENSG00000125931	ENST00000431381	0
CITED1	ENSG00000125931	ENST00000454225	0
CITED1	ENSG00000125931	ENST00000246139	0
CITED1	ENSG00000125931	ENST00000453707	0
CITED1	ENSG00000125931	ENST00000373619	0
HDAC8	ENSG00000147099	ENST00000429103	0
HDAC8	ENSG00000147099	ENST00000373573	0
HMGN5	ENSG00000198157	ENST00000373250	0
HMGN5	ENSG00000198157	ENST00000430960	0
HMGN5	ENSG00000198157	ENST00000447319	0
HMGN5	ENSG00000198157	ENST00000451455	0
HMGN5	ENSG00000198157	ENST00000436386	0
HMGN5	ENSG00000198157	ENST00000358130	0
MORF4L2	ENSG00000123562	ENST00000423833	1
MORF4L2	ENSG00000123562	ENST00000441076	2
MORF4L2	ENSG00000123562	ENST00000422355	2
MORF4L2	ENSG00000123562	ENST00000442614	2
MORF4L2	ENSG00000123562	ENST00000422154	2
MORF4L2	ENSG00000123562	ENST00000434230	0
MORF4L2	ENSG00000123562	ENST00000418819	0
MORF4L2	ENSG00000123562	ENST00000360458	0
MORF4L2	ENSG00000123562	ENST00000433176	0
SMARCA1	ENSG00000102038	ENST00000371121	0
SMARCA1	ENSG00000102038	ENST00000371123	0
BCORL1	ENSG00000085185	ENST00000218147	0
BCORL1	ENSG00000085185	ENST00000303743	0
BCORL1	ENSG00000085185	ENST00000540052	0

## Sheet: Sperm
HGNC Gene Name	Ensembl Gene ID	Ensembl Transcript ID	SNP count				unique only		Genes	361	Transcripts	936
CHD5	ENSG00000116254	ENST00000262450	4				ACE
TSSK3	ENSG00000162526	ENST00000373534	2				BRCA2
PHC2	ENSG00000134686	ENST00000373418	2				SOD1
PHC2	ENSG00000134686	ENST00000373422	0				KIT
PHC2	ENSG00000134686	ENST00000431992	2				MLH1
PHC2	ENSG00000134686	ENST00000419414	4				NOTCH1
INPP5B	ENSG00000204084	ENST00000458109	1				APOB
INPP5B	ENSG00000204084	ENST00000373027	8				TP63
INPP5B	ENSG00000204084	ENST00000373026	5				SIRT1
INPP5B	ENSG00000204084	ENST00000373021	5				HTT
INPP5B	ENSG00000204084	ENST00000373024	1				ERCC1
INPP5B	ENSG00000204084	ENST00000373023	1				BCL2L1
MYCBP	ENSG00000214114	ENST00000397572	7				E2F1
SCMH1	ENSG00000010803	ENST00000456518	2				CNR1
SCMH1	ENSG00000010803	ENST00000326197	1				RBP4
SCMH1	ENSG00000010803	ENST00000402904	2				BCL2L11
SCMH1	ENSG00000010803	ENST00000361705	2				H2AFX
SCMH1	ENSG00000010803	ENST00000372595	5				FSHR
SCMH1	ENSG00000010803	ENST00000337495	2				RARA
SCMH1	ENSG00000010803	ENST00000372597	2				CALR
TESK2	ENSG00000070759	ENST00000372084	3				TBP
TESK2	ENSG00000070759	ENST00000538496	5				BCL6
TESK2	ENSG00000070759	ENST00000372086	5				CCNB1
TESK2	ENSG00000070759	ENST00000341771	5				SOX9
TESK2	ENSG00000070759	ENST00000451835	5				YY1
SPATA6	ENSG00000132122	ENST00000371841	3				GLI1
SPATA6	ENSG00000132122	ENST00000371843	8				PTTG1
SPATA6	ENSG00000132122	ENST00000396199	7				HSF1
SPATA6	ENSG00000132122	ENST00000371847	7				DNMT3A
NDC1	ENSG00000058804	ENST00000537333	2				GATA4
NDC1	ENSG00000058804	ENST00000234725	2				CLOCK
NDC1	ENSG00000058804	ENST00000540001	1				GGT1
NDC1	ENSG00000058804	ENST00000371429	0				NR0B1
MSH4	ENSG00000057468	ENST00000263187	3				IGF2R
BRDT	ENSG00000137948	ENST00000362005	3				BIRC3
BRDT	ENSG00000137948	ENST00000423434	3				ATRX
BRDT	ENSG00000137948	ENST00000440509	4				AXL
BRDT	ENSG00000137948	ENST00000449584	5				CADM1
BRDT	ENSG00000137948	ENST00000355011	5				SSTR2
BRDT	ENSG00000137948	ENST00000450792	5				CDC25C
BRDT	ENSG00000137948	ENST00000457265	5				PAX5
BRDT	ENSG00000137948	ENST00000402388	3				HOXA10
SYCP1	ENSG00000198765	ENST00000369522	3				RGS2
SYCP1	ENSG00000198765	ENST00000455987	3				WFDC2
SYCP1	ENSG00000198765	ENST00000369518	2				INSL3
HORMAD1	ENSG00000143452	ENST00000368987	1				CREM
HORMAD1	ENSG00000143452	ENST00000442853	1				HOXA9
HORMAD1	ENSG00000143452	ENST00000368995	1				SERPINA5
HORMAD1	ENSG00000143452	ENST00000322343	1				PIAS1
CELF3	ENSG00000159409	ENST00000392706	3				CCNA1
CELF3	ENSG00000159409	ENST00000290585	5				MERTK
CELF3	ENSG00000159409	ENST00000420342	4				KIAA1524
CELF3	ENSG00000159409	ENST00000290583	4				SIAH1
OAZ3	ENSG00000143450	ENST00000321531	4				RUVBL1
TDRKH	ENSG00000182134	ENST00000526378	0				ACVR2A
TDRKH	ENSG00000182134	ENST00000440583	3				HIST1H1A
TDRKH	ENSG00000182134	ENST00000368825	2				RAD18
TDRKH	ENSG00000182134	ENST00000458431	2				RAD51C
TDRKH	ENSG00000182134	ENST00000368827	2				SKIL
TDRKH	ENSG00000182134	ENST00000368822	2				DAZL
CREB3L4	ENSG00000143578	ENST00000405694	1				RAD23B
CREB3L4	ENSG00000143578	ENST00000449724	1				ARNTL
CREB3L4	ENSG00000143578	ENST00000368607	1				TSPY1
CREB3L4	ENSG00000143578	ENST00000271889	1				ROS1
CREB3L4	ENSG00000143578	ENST00000368601	1				NR2C2
CREB3L4	ENSG00000143578	ENST00000368600	1				MST1
CREB3L4	ENSG00000143578	ENST00000431292	1				ADCYAP1R1
ATP1A4	ENSG00000132681	ENST00000368081	6				BAG6
ATP1A4	ENSG00000132681	ENST00000470705	6				ASPM
DEDD	ENSG00000158796	ENST00000368005	1				KRT9
DEDD	ENSG00000158796	ENST00000458050	0				BCL2L2
DEDD	ENSG00000158796	ENST00000464113	0				BIK
DEDD	ENSG00000158796	ENST00000490843	0				DAZ1
DEDD	ENSG00000158796	ENST00000368006	0				BCAP31
DEDD	ENSG00000158796	ENST00000392188	0				PRDX4
MAEL	ENSG00000143194	ENST00000367872	3				RACGAP1
MAEL	ENSG00000143194	ENST00000367870	1				AKAP9
MAEL	ENSG00000143194	ENST00000447624	2				BRD2
ADCY10	ENSG00000143199	ENST00000367851	2				CETN2
ADCY10	ENSG00000143199	ENST00000545172	4				SOX17
RGS2	ENSG00000116741	ENST00000235382	5				DNAJA1
ASPM	ENSG00000066279	ENST00000367408	0				CTSH
ASPM	ENSG00000066279	ENST00000367409	0				UBE2B
TSNAX	ENSG00000116918	ENST00000366639	3				PRM2
ARID4B	ENSG00000054267	ENST00000366603	1				SPAG9
ARID4B	ENSG00000054267	ENST00000418304	3				SSTR1
ARID4B	ENSG00000054267	ENST00000264183	3				JAG2
ARID4B	ENSG00000054267	ENST00000349213	3				HERC2
APOB	ENSG00000084674	ENST00000233242	9				HOXA11
DNMT3A	ENSG00000119772	ENST00000380746	0				ADCY10
DNMT3A	ENSG00000119772	ENST00000321117	1				ING2
DNMT3A	ENSG00000119772	ENST00000264709	1				PRM1
FSHR	ENSG00000170820	ENST00000541117	4				FSTL3
FSHR	ENSG00000170820	ENST00000304421	5				ADAM28
FSHR	ENSG00000170820	ENST00000346173	5				TRIM27
FSHR	ENSG00000170820	ENST00000406846	5				DNMT3L
PSME4	ENSG00000068878	ENST00000421748	2				MAS1
PSME4	ENSG00000068878	ENST00000404125	8				SSTR3
GMCL1	ENSG00000087338	ENST00000282570	4				PRKAG1
CYP26B1	ENSG00000003137	ENST00000546307	0				LIMK2
CYP26B1	ENSG00000003137	ENST00000001146	0				HSF2
M1AP	ENSG00000159374	ENST00000290536	0				TYRO3
M1AP	ENSG00000159374	ENST00000536235	1				PMCH
TSGA10	ENSG00000135951	ENST00000410001	3				CTSV
TSGA10	ENSG00000135951	ENST00000542655	3				DMC1
TSGA10	ENSG00000135951	ENST00000539964	2				PROK2
TSGA10	ENSG00000135951	ENST00000355053	2				BCL2L10
TSGA10	ENSG00000135951	ENST00000393483	5				CLDN11
BCL2L11	ENSG00000153094	ENST00000432179	5				CYP26B1
BCL2L11	ENSG00000153094	ENST00000337565	4				FANCF
BCL2L11	ENSG00000153094	ENST00000393256	4				SPA17
BCL2L11	ENSG00000153094	ENST00000393252	4				YBX3
MERTK	ENSG00000153208	ENST00000295408	4				EIF5A2
MERTK	ENSG00000153208	ENST00000421804	4				ACOX1
WDR33	ENSG00000136709	ENST00000408998	5				TSNAX
WDR33	ENSG00000136709	ENST00000322313	5				PIWIL2
WDR33	ENSG00000136709	ENST00000393006	5				CATSPER1
ACVR2A	ENSG00000121989	ENST00000535787	6				DMRT1
ACVR2A	ENSG00000121989	ENST00000404590	6				DIAPH3
BOLL	ENSG00000152430	ENST00000433157	7				PRDM9
BOLL	ENSG00000152430	ENST00000392296	4				GAMT
BOLL	ENSG00000152430	ENST00000282278	1				CHD5
BOLL	ENSG00000152430	ENST00000321801	1				NR6A1
SPAG16	ENSG00000144451	ENST00000331683	2				SGPL1
SPAG16	ENSG00000144451	ENST00000432529	2				KHDRBS3
SPAG16	ENSG00000144451	ENST00000413312	2				PGM3
SPAG16	ENSG00000144451	ENST00000272898	2				XRN2
SPAG16	ENSG00000144451	ENST00000374309	2				PRKACG
SPAG16	ENSG00000144451	ENST00000451561	4				B4GALNT1
RAD18	ENSG00000070950	ENST00000264926	5				LGR4
RAD18	ENSG00000070950	ENST00000413832	6				DAZ2
NR2C2	ENSG00000177463	ENST00000435454	5				INPP5B
NR2C2	ENSG00000177463	ENST00000323373	5				USP9Y
NR2C2	ENSG00000177463	ENST00000437120	0				ASF1B
NR2C2	ENSG00000177463	ENST00000406272	0				TAF4B
DAZL	ENSG00000092345	ENST00000399444	4				CDK16
CRTAP	ENSG00000170275	ENST00000320954	3				MSH4
MLH1	ENSG00000076242	ENST00000231790	1				CIT
MLH1	ENSG00000076242	ENST00000539477	1				DDX4
MLH1	ENSG00000076242	ENST00000536378	2				TNP2
WDR48	ENSG00000114742	ENST00000302313	2				WDR48
WDR48	ENSG00000114742	ENST00000418020	2				MYCBP
ZNF35	ENSG00000169981	ENST00000396056	1				FOXJ1
ZNF35	ENSG00000169981	ENST00000432115	1				DAZ3
ZNF35	ENSG00000169981	ENST00000542250	1				GAL3ST1
PRSS42	ENSG00000178055	ENST00000429665	3				ARID4A
MST1	ENSG00000173531	ENST00000383728	1				SYCP3
MST1	ENSG00000173531	ENST00000545762	1				KDM2B
MST1	ENSG00000173531	ENST00000449682	2				MAK
SFMBT1	ENSG00000163935	ENST00000394750	1				ODF1
SFMBT1	ENSG00000163935	ENST00000482396	7				PAFAH1B2
SFMBT1	ENSG00000163935	ENST00000358080	7				ATP1A4
SFMBT1	ENSG00000163935	ENST00000394752	7				FKBP6
SFMBT1	ENSG00000163935	ENST00000497586	4				DAZAP1
SFMBT1	ENSG00000163935	ENST00000483069	4				DAZ4
PROK2	ENSG00000163421	ENST00000295619	3				SBF1
PROK2	ENSG00000163421	ENST00000353065	3				PLEKHA1
KIAA1524	ENSG00000163507	ENST00000491772	4				RNF114
KIAA1524	ENSG00000163507	ENST00000295746	3				CDY1
MORC1	ENSG00000114487	ENST00000232603	2				BOLL
SLC9C1	ENSG00000172139	ENST00000487372	5				SLC22A16
SLC9C1	ENSG00000172139	ENST00000305815	5				PGAM2
ROPN1B	ENSG00000114547	ENST00000514116	1				CRTAP
ROPN1B	ENSG00000114547	ENST00000251776	1				FOXA3
ROPN1B	ENSG00000114547	ENST00000513830	1				ADAMTS2
ROPN1B	ENSG00000114547	ENST00000508088	1				UBR2
ROPN1B	ENSG00000114547	ENST00000505382	1				PATZ1
ROPN1B	ENSG00000114547	ENST00000511082	1				CEP131
RUVBL1	ENSG00000175792	ENST00000417360	0				HIST1H1T
RUVBL1	ENSG00000175792	ENST00000322623	0				BRDT
SKIL	ENSG00000136603	ENST00000476188	3				SOX8
SKIL	ENSG00000136603	ENST00000259119	3				PRSS21
SKIL	ENSG00000136603	ENST00000413427	3				PAIP2
CLDN11	ENSG00000013297	ENST00000064724	3				TRIP13
CLDN11	ENSG00000013297	ENST00000451576	2				AZIN2
EIF5A2	ENSG00000163577	ENST00000295822	3				CDYL
SPATA16	ENSG00000144962	ENST00000351008	4				PAFAH1B3
RPL39L	ENSG00000163923	ENST00000455270	5				SPAG11B
RPL39L	ENSG00000163923	ENST00000296277	3				PIWIL4
RPL39L	ENSG00000163923	ENST00000433055	10				NPAP1
BCL6	ENSG00000113916	ENST00000430339	5				YBX2
BCL6	ENSG00000113916	ENST00000232014	4				DNAH9
BCL6	ENSG00000113916	ENST00000438077	4				SPAG16
BCL6	ENSG00000113916	ENST00000406870	3				DEDD
TP63	ENSG00000073282	ENST00000264731	4				PHC2
TP63	ENSG00000073282	ENST00000418709	4				SPATA2
TP63	ENSG00000073282	ENST00000392460	4				TSGA10
TP63	ENSG00000073282	ENST00000354600	5				SYCP1
TP63	ENSG00000073282	ENST00000437221	5				TCP11
HTT	ENSG00000197386	ENST00000355072	9				CREB3L4
KIT	ENSG00000157404	ENST00000288135	1				STRA8
CLOCK	ENSG00000134852	ENST00000309964	7				HIST1H2BA
CLOCK	ENSG00000134852	ENST00000435527	5				SFMBT1
CLOCK	ENSG00000134852	ENST00000513440	3				NME8
CABS1	ENSG00000145309	ENST00000273936	5				NDRG3
CCNI	ENSG00000118816	ENST00000505609	5				PSME4
CCNI	ENSG00000118816	ENST00000513774	10				ARID4B
CCNI	ENSG00000118816	ENST00000537948	10				TESK1
CCNI	ENSG00000118816	ENST00000237654	10				HORMAD1
SPATA5	ENSG00000145375	ENST00000274008	6				ALKBH5
ADAM29	ENSG00000168594	ENST00000505141	4				SPATA16
ADAM29	ENSG00000168594	ENST00000502940	4				WDR33
ADAM29	ENSG00000168594	ENST00000502305	4				OVOL1
ADAM29	ENSG00000168594	ENST00000404450	3				FAM50A
ADAM29	ENSG00000168594	ENST00000514159	3				VIPAS39
ING2	ENSG00000168556	ENST00000302327	4				TDRD7
ING2	ENSG00000168556	ENST00000434682	3				ATAT1
TRIP13	ENSG00000071539	ENST00000166345	4				ZNF35
PRDM9	ENSG00000164256	ENST00000502755	2				CHTF18
PRDM9	ENSG00000164256	ENST00000296682	3				NANOS3
SPEF2	ENSG00000152582	ENST00000282469	4				NDC1
SPEF2	ENSG00000152582	ENST00000303129	1				REC8
DDX4	ENSG00000152670	ENST00000514278	3				PCYT1B
DDX4	ENSG00000152670	ENST00000505374	3				TUBD1
DDX4	ENSG00000152670	ENST00000506848	3				SPANXA1
DDX4	ENSG00000152670	ENST00000514679	3				CDY2A
DDX4	ENSG00000152670	ENST00000354991	2				DEFB118
CCNB1	ENSG00000134057	ENST00000256442	5				CDY1B
SPATA9	ENSG00000145757	ENST00000395899	3				CCT6B
SPATA9	ENSG00000145757	ENST00000274432	3				MAEL
SLCO4C1	ENSG00000173930	ENST00000310954	4				CATSPER2
UBE2B	ENSG00000119048	ENST00000265339	2				OAZ3
NME5	ENSG00000112981	ENST00000265191	1				SPAG4
CDC25C	ENSG00000158402	ENST00000415130	4				SPO11
CDC25C	ENSG00000158402	ENST00000356505	3				SPATA5
CDC25C	ENSG00000158402	ENST00000323760	3				SUN5
CDC25C	ENSG00000158402	ENST00000503022	3				SLCO4C1
CDC25C	ENSG00000158402	ENST00000513970	3				SOX30
PAIP2	ENSG00000120727	ENST00000507755	1				HERC4
PAIP2	ENSG00000120727	ENST00000265192	1				IMMP2L
PAIP2	ENSG00000120727	ENST00000394795	2				SOHLH1
PAIP2	ENSG00000120727	ENST00000510080	3				GGNBP2
SPATA24	ENSG00000170469	ENST00000451821	2				CCNI
SPATA24	ENSG00000170469	ENST00000450845	2				RPL39L
PCDHGA4	ENSG00000262576	ENST00000571252	1				DZIP1
PCDHGA9	ENSG00000261934	ENST00000573521	1				ADAM29
SOX30	ENSG00000039600	ENST00000311371	4				DUSP13
SOX30	ENSG00000039600	ENST00000265007	3				TCFL5
PTTG1	ENSG00000164611	ENST00000352433	2				TAF7L
PTTG1	ENSG00000164611	ENST00000520452	3				TXNDC2
PTTG1	ENSG00000164611	ENST00000393964	2				WIPF3
ADAMTS2	ENSG00000087116	ENST00000251582	4				NANOS2
CDYL	ENSG00000153046	ENST00000328908	5				ELL3
CDYL	ENSG00000153046	ENST00000397588	0				KATNAL1
CDYL	ENSG00000153046	ENST00000449732	4				ODF4
CDYL	ENSG00000153046	ENST00000343762	3				SPANXA2
MAK	ENSG00000111837	ENST00000354489	1				CELF3
MAK	ENSG00000111837	ENST00000538030	1				ADGRG2
MAK	ENSG00000111837	ENST00000313243	2				SLC2A14
MAK	ENSG00000111837	ENST00000536370	2				CALR3
MAK	ENSG00000111837	ENST00000474039	2				SPEF2
HIST1H2BA	ENSG00000146047	ENST00000274764	6				ASZ1
HIST1H1A	ENSG00000124610	ENST00000244573	1				USP42
HIST1H1T	ENSG00000187475	ENST00000338379	2				NME5
TRIM27	ENSG00000204713	ENST00000414543	3				BPY2
TRIM27	ENSG00000204713	ENST00000377194	2				TSSK4
TRIM27	ENSG00000204713	ENST00000377199	2				SPATA19
ATAT1	ENSG00000137343	ENST00000318999	5				RPL10L
ATAT1	ENSG00000137343	ENST00000376478	5				TDRKH
ATAT1	ENSG00000137343	ENST00000319027	5				ACSBG2
ATAT1	ENSG00000137343	ENST00000376483	5				VCX
ATAT1	ENSG00000137343	ENST00000329992	5				HILS1
BAG6	ENSG00000204463	ENST00000422948	2				GMCL1
BAG6	ENSG00000204463	ENST00000441793	1				TESK2
BAG6	ENSG00000204463	ENST00000438149	0				SCMH1
BAG6	ENSG00000204463	ENST00000453833	3				CDY2B
BAG6	ENSG00000204463	ENST00000434444	4				NLRP14
BAG6	ENSG00000204463	ENST00000433828	3				TDRD1
BAG6	ENSG00000204463	ENST00000456286	3				AK7
BAG6	ENSG00000204463	ENST00000454165	4				MTL5
BAG6	ENSG00000204463	ENST00000428326	4				UTP14C
BAG6	ENSG00000204463	ENST00000452994	4				CYLC2
BAG6	ENSG00000204463	ENST00000424176	3				TXNRD3
BAG6	ENSG00000204463	ENST00000456622	2				MOV10L1
BAG6	ENSG00000204463	ENST00000435080	2				PRM3
BAG6	ENSG00000204463	ENST00000375976	2				MYCBPAP
BAG6	ENSG00000204463	ENST00000441054	2				IFT81
BAG6	ENSG00000204463	ENST00000451898	2				SPATA20
BAG6	ENSG00000204463	ENST00000439687	2				SOHLH2
BAG6	ENSG00000204463	ENST00000424480	2				TBATA
BAG6	ENSG00000204463	ENST00000437771	2				CYLC1
BAG6	ENSG00000204463	ENST00000404765	2				GGN
BAG6	ENSG00000204463	ENST00000211379	2				SPATA9
BRD2	ENSG00000204256	ENST00000374825	7				ZNF296
BRD2	ENSG00000204256	ENST00000374831	7				STYX
BRD2	ENSG00000204256	ENST00000395289	7				ODF3
BRD2	ENSG00000204256	ENST00000443797	8				TEX15
BRD2	ENSG00000204256	ENST00000607833	3				SLC9C1
BRD2	ENSG00000204256	ENST00000449085	7				HSF2BP
GGNBP1	ENSG00000204188	ENST00000374458	1				C9orf24
TCP11	ENSG00000124678	ENST00000373979	4				PIWIL3
TCP11	ENSG00000124678	ENST00000492680	5				MEA1
TCP11	ENSG00000124678	ENST00000244645	4				TSSK3
TCP11	ENSG00000124678	ENST00000311875	3				MORC1
UBR2	ENSG00000024048	ENST00000372903	1				THEG
UBR2	ENSG00000024048	ENST00000372883	1				TDRD6
MEA1	ENSG00000124733	ENST00000244711	1				MEIG1
TDRD6	ENSG00000180113	ENST00000544460	1				TSNAXIP1
TDRD6	ENSG00000180113	ENST00000316081	3				CCIN
TDRD6	ENSG00000180113	ENST00000450697	0				SPATA6
PGM3	ENSG00000013375	ENST00000513973	3				CATSPERB
PGM3	ENSG00000013375	ENST00000507554	2				ADAM18
CNR1	ENSG00000118432	ENST00000549716	3				M1AP
CNR1	ENSG00000118432	ENST00000468898	3				PCDHGA9
CNR1	ENSG00000118432	ENST00000549890	3				DPCD
CNR1	ENSG00000118432	ENST00000537554	4				ADIG
CNR1	ENSG00000118432	ENST00000428600	5				RBMY1F
CNR1	ENSG00000118432	ENST00000369499	0				ZGLP1
CNR1	ENSG00000118432	ENST00000551417	0				PCDHGA4
CNR1	ENSG00000118432	ENST00000535130	0				MICALCL
CNR1	ENSG00000118432	ENST00000369501	4				CATSPERG
SLC22A16	ENSG00000004809	ENST00000451557	5				RBMY1B
SLC22A16	ENSG00000004809	ENST00000330550	4				TEX40
SLC22A16	ENSG00000004809	ENST00000424139	21				TXNDC8
SLC22A16	ENSG00000004809	ENST00000437378	21				DRC7
SLC22A16	ENSG00000004809	ENST00000434949	22				SPATA24
SLC22A16	ENSG00000004809	ENST00000456137	12				SPATA31A7
SLC22A16	ENSG00000004809	ENST00000368919	12				ZSCAN2
ROS1	ENSG00000047936	ENST00000403284	3				AKAP14
ROS1	ENSG00000047936	ENST00000368508	3				TDRD9
HSF2	ENSG00000025156	ENST00000368455	4				TDRP
HSF2	ENSG00000025156	ENST00000452194	4				CABS1
MAS1	ENSG00000130368	ENST00000252660	1				RBMY1J
IGF2R	ENSG00000197081	ENST00000356956	1				CCDC155
TBP	ENSG00000112592	ENST00000392092	5				GGNBP1
TBP	ENSG00000112592	ENST00000230354	6				HERPUD2
USP42	ENSG00000106346	ENST00000306177	4				SYCE3
HOXA9	ENSG00000078399	ENST00000343483	5				BPY2C
HOXA10	ENSG00000253293	ENST00000283921	2				BPY2B
HOXA10	ENSG00000253293	ENST00000396344	2				OR7C1
HOXA11	ENSG00000005073	ENST00000006015	1				RAD21L1
WIPF3	ENSG00000122574	ENST00000409123	3				PXT1
WIPF3	ENSG00000122574	ENST00000242140	2				SPATA32
ADCYAP1R1	ENSG00000078549	ENST00000304166	2				TDRD12
ADCYAP1R1	ENSG00000078549	ENST00000431811	3				SPATA25
HERPUD2	ENSG00000122557	ENST00000396081	3				TSPY2
HERPUD2	ENSG00000122557	ENST00000603731	4				ZFP41
NME8	ENSG00000086288	ENST00000199447	15				ROPN1B
NME8	ENSG00000086288	ENST00000440017	11				GMCL1P1
PGAM2	ENSG00000164708	ENST00000297283	4				TEX19
FKBP6	ENSG00000077800	ENST00000431982	1				SPATA31A3
FKBP6	ENSG00000077800	ENST00000252037	1				RNF151
AKAP9	ENSG00000127914	ENST00000356239	2				CATSPERD
AKAP9	ENSG00000127914	ENST00000359028	3				SPATA31A1
IMMP2L	ENSG00000184903	ENST00000415362	3				ZNF541
IMMP2L	ENSG00000184903	ENST00000405709	3				SPATA31E1
IMMP2L	ENSG00000184903	ENST00000452895	5				CNBD2
IMMP2L	ENSG00000184903	ENST00000452753	5				MEI4
IMMP2L	ENSG00000184903	ENST00000331762	5				TSPY4
ASZ1	ENSG00000154438	ENST00000284629	2				SPATA31A5
STRA8	ENSG00000146857	ENST00000275764	0				SPATA31A6
TDRP	ENSG00000180190	ENST00000427263	4				PRSS42
TDRP	ENSG00000180190	ENST00000324079	3				TSPY10
SPAG11B	ENSG00000164871	ENST00000359758	0				TSPY8
SPAG11B	ENSG00000164871	ENST00000398462	0				SPATA31D3
SPAG11B	ENSG00000164871	ENST00000297498	0				TSPY3
SPAG11B	ENSG00000164871	ENST00000317900	0				SPATA31D1
GATA4	ENSG00000136574	ENST00000532977	2				SPATA31C2
GATA4	ENSG00000136574	ENST00000526974	1				SPATA31D4
GATA4	ENSG00000136574	ENST00000335135	3				SPATA31C1
PIWIL2	ENSG00000197181	ENST00000356766	3				SPATA31B1P
ADAM28	ENSG00000042980	ENST00000265769	4
ADAM28	ENSG00000042980	ENST00000540823	4
ADAM28	ENSG00000042980	ENST00000437154	4
TEX15	ENSG00000133863	ENST00000256246	2
ADAM18	ENSG00000168619	ENST00000265707	1
ADAM18	ENSG00000168619	ENST00000379866	1
ADAM18	ENSG00000168619	ENST00000541111	1
SOX17	ENSG00000164736	ENST00000297316	1
ODF1	ENSG00000155087	ENST00000285402	2
KHDRBS3	ENSG00000131773	ENST00000355849	3
ZFP41	ENSG00000181638	ENST00000520584	4
ZFP41	ENSG00000181638	ENST00000330701	2
HSF1	ENSG00000185122	ENST00000528838	0
DMRT1	ENSG00000137090	ENST00000382276	4
DNAJA1	ENSG00000086061	ENST00000330899	9
DNAJA1	ENSG00000086061	ENST00000544625	8
C9orf24	ENSG00000164972	ENST00000379124	0
C9orf24	ENSG00000164972	ENST00000379126	0
C9orf24	ENSG00000164972	ENST00000379127	0
C9orf24	ENSG00000164972	ENST00000379133	1
C9orf24	ENSG00000164972	ENST00000444429	2
C9orf24	ENSG00000164972	ENST00000297623	1
TESK1	ENSG00000107140	ENST00000336395	2
CCIN	ENSG00000185972	ENST00000335119	4
PAX5	ENSG00000196092	ENST00000358127	3
SPATA31A1	ENSG00000204849	ENST00000377647	4
SPATA31A3	ENSG00000147926	ENST00000356699	0
SPATA31A5	ENSG00000233788	ENST00000377621	0
SPATA31A6	ENSG00000185775	ENST00000332857	8
SPATA31A7	ENSG00000234734	ENST00000355045	0
PRKACG	ENSG00000165059	ENST00000377276	2
SPATA31D1	ENSG00000214929	ENST00000344803	0
SPATA31E1	ENSG00000177992	ENST00000325643	0
CTSV	ENSG00000136943	ENST00000259470	4
CTSV	ENSG00000136943	ENST00000538255	5
TDRD7	ENSG00000196116	ENST00000355295	1
TDRD7	ENSG00000196116	ENST00000422139	2
TDRD7	ENSG00000196116	ENST00000540902	3
CYLC2	ENSG00000155833	ENST00000374798	2
CYLC2	ENSG00000155833	ENST00000487798	2
RAD23B	ENSG00000119318	ENST00000419616	4
RAD23B	ENSG00000119318	ENST00000358015	4
RAD23B	ENSG00000119318	ENST00000416373	5
RAD23B	ENSG00000119318	ENST00000442587	4
RAD23B	ENSG00000119318	ENST00000457811	5
TXNDC8	ENSG00000204193	ENST00000374510	2
TXNDC8	ENSG00000204193	ENST00000374511	1
NR6A1	ENSG00000148200	ENST00000487099	0
NR6A1	ENSG00000148200	ENST00000416460	0
SOHLH1	ENSG00000165643	ENST00000298466	6
NOTCH1	ENSG00000148400	ENST00000277541	4
MEIG1	ENSG00000197889	ENST00000407572	4
MEIG1	ENSG00000197889	ENST00000378240	7
CREM	ENSG00000095794	ENST00000374726	5
CREM	ENSG00000095794	ENST00000354759	5
CREM	ENSG00000095794	ENST00000489321	3
CREM	ENSG00000095794	ENST00000427847	3
CREM	ENSG00000095794	ENST00000395895	3
CREM	ENSG00000095794	ENST00000333809	5
CREM	ENSG00000095794	ENST00000337656	5
CREM	ENSG00000095794	ENST00000348787	4
CREM	ENSG00000095794	ENST00000361599	4
CREM	ENSG00000095794	ENST00000484283	4
CREM	ENSG00000095794	ENST00000342105	5
CREM	ENSG00000095794	ENST00000463960	5
CREM	ENSG00000095794	ENST00000487763	2
CREM	ENSG00000095794	ENST00000488328	2
CREM	ENSG00000095794	ENST00000356917	2
CREM	ENSG00000095794	ENST00000488741	0
CREM	ENSG00000095794	ENST00000474931	0
CREM	ENSG00000095794	ENST00000344351	0
CREM	ENSG00000095794	ENST00000490511	1
SIRT1	ENSG00000096717	ENST00000212015	4
SIRT1	ENSG00000096717	ENST00000432464	2
HERC4	ENSG00000148634	ENST00000277817	3
HERC4	ENSG00000148634	ENST00000506515	3
HERC4	ENSG00000148634	ENST00000395187	5
HERC4	ENSG00000148634	ENST00000412272	5
HERC4	ENSG00000148634	ENST00000373700	3
TBATA	ENSG00000166220	ENST00000545575	4
TBATA	ENSG00000166220	ENST00000456372	4
TBATA	ENSG00000166220	ENST00000299290	2
SGPL1	ENSG00000166224	ENST00000373202	2
SGPL1	ENSG00000166224	ENST00000299297	4
SGPL1	ENSG00000166224	ENST00000409118	4
DUSP13	ENSG00000079393	ENST00000472493	2
DUSP13	ENSG00000079393	ENST00000491677	0
DUSP13	ENSG00000079393	ENST00000372702	0
RBP4	ENSG00000138207	ENST00000371464	2
RBP4	ENSG00000138207	ENST00000371467	2
DPCD	ENSG00000166171	ENST00000416979	1
DPCD	ENSG00000166171	ENST00000370151	1
DPCD	ENSG00000166171	ENST00000370147	3
DPCD	ENSG00000166171	ENST00000370148	3
DPCD	ENSG00000166171	ENST00000434727	3
TDRD1	ENSG00000095627	ENST00000369282	3
TDRD1	ENSG00000095627	ENST00000369280	2
PLEKHA1	ENSG00000107679	ENST00000368990	1
PLEKHA1	ENSG00000107679	ENST00000368988	1
PLEKHA1	ENSG00000107679	ENST00000463663	2
PLEKHA1	ENSG00000107679	ENST00000538022	7
PLEKHA1	ENSG00000107679	ENST00000392799	6
PLEKHA1	ENSG00000107679	ENST00000433307	0
ODF3	ENSG00000177947	ENST00000325113	8
ODF3	ENSG00000177947	ENST00000342593	8
NLRP14	ENSG00000158077	ENST00000299481	3
MICALCL	ENSG00000133808	ENST00000533534	10
MICALCL	ENSG00000133808	ENST00000256186	4
ARNTL	ENSG00000133794	ENST00000529050	5
ARNTL	ENSG00000133794	ENST00000527998	7
ARNTL	ENSG00000133794	ENST00000396441	6
ARNTL	ENSG00000133794	ENST00000533520	6
ARNTL	ENSG00000133794	ENST00000529825	6
ARNTL	ENSG00000133794	ENST00000389707	6
ARNTL	ENSG00000133794	ENST00000529388	6
ARNTL	ENSG00000133794	ENST00000530357	5
ARNTL	ENSG00000133794	ENST00000361003	5
ARNTL	ENSG00000133794	ENST00000403510	5
ARNTL	ENSG00000133794	ENST00000482049	5
FANCF	ENSG00000183161	ENST00000327470	3
LGR4	ENSG00000205213	ENST00000379214	3
TEX40	ENSG00000219435	ENST00000328404	1
OVOL1	ENSG00000172818	ENST00000335987	3
CATSPER1	ENSG00000175294	ENST00000312106	2
MTL5	ENSG00000132749	ENST00000544963	2
MTL5	ENSG00000132749	ENST00000443940	2
MTL5	ENSG00000132749	ENST00000255087	2
PIWIL4	ENSG00000134627	ENST00000299001	3
BIRC3	ENSG00000023445	ENST00000263464	2
BIRC3	ENSG00000023445	ENST00000532808	3
CADM1	ENSG00000182985	ENST00000452722	1
CADM1	ENSG00000182985	ENST00000542447	0
PAFAH1B2	ENSG00000168092	ENST00000527958	4
PAFAH1B2	ENSG00000168092	ENST00000419197	4
H2AFX	ENSG00000188486	ENST00000530167	6
SPATA19	ENSG00000166118	ENST00000299140	4
SPATA19	ENSG00000166118	ENST00000532889	4
SLC2A14	ENSG00000173262	ENST00000542546	3
SLC2A14	ENSG00000173262	ENST00000542916	2
SLC2A14	ENSG00000173262	ENST00000535344	3
SLC2A14	ENSG00000173262	ENST00000543909	4
SLC2A14	ENSG00000173262	ENST00000340749	4
SLC2A14	ENSG00000173262	ENST00000546234	4
SLC2A14	ENSG00000173262	ENST00000535587	4
SLC2A14	ENSG00000173262	ENST00000537557	4
SLC2A14	ENSG00000173262	ENST00000431042	4
SLC2A14	ENSG00000173262	ENST00000542782	4
SLC2A14	ENSG00000173262	ENST00000396589	4
SLC2A14	ENSG00000173262	ENST00000535266	5
SLC2A14	ENSG00000173262	ENST00000542505	3
SLC2A14	ENSG00000173262	ENST00000535383	5
YBX3	ENSG00000060138	ENST00000279550	5
YBX3	ENSG00000060138	ENST00000228251	5
PRKAG1	ENSG00000181929	ENST00000395170	2
PRKAG1	ENSG00000181929	ENST00000548065	3
RACGAP1	ENSG00000161800	ENST00000551016	3
RACGAP1	ENSG00000161800	ENST00000551876	2
RACGAP1	ENSG00000161800	ENST00000454520	1
RACGAP1	ENSG00000161800	ENST00000548824	1
RACGAP1	ENSG00000161800	ENST00000549777	1
RACGAP1	ENSG00000161800	ENST00000546723	1
RACGAP1	ENSG00000161800	ENST00000427314	1
RACGAP1	ENSG00000161800	ENST00000552310	2
RACGAP1	ENSG00000161800	ENST00000312377	2
RACGAP1	ENSG00000161800	ENST00000546764	2
RACGAP1	ENSG00000161800	ENST00000552004	2
RACGAP1	ENSG00000161800	ENST00000547905	2
RACGAP1	ENSG00000161800	ENST00000434422	2
RACGAP1	ENSG00000161800	ENST00000552921	2
GLI1	ENSG00000111087	ENST00000532291	5
GLI1	ENSG00000111087	ENST00000228682	5
GLI1	ENSG00000111087	ENST00000546141	5
GLI1	ENSG00000111087	ENST00000528432	7
GLI1	ENSG00000111087	ENST00000528467	3
B4GALNT1	ENSG00000135454	ENST00000548888	2
B4GALNT1	ENSG00000135454	ENST00000551220	2
B4GALNT1	ENSG00000135454	ENST00000341156	3
SYCP3	ENSG00000139351	ENST00000392924	10
SYCP3	ENSG00000139351	ENST00000266743	9
SYCP3	ENSG00000139351	ENST00000392927	9
PMCH	ENSG00000183395	ENST00000329406	0
IFT81	ENSG00000122970	ENST00000361948	3
IFT81	ENSG00000122970	ENST00000242591	3
CIT	ENSG00000122966	ENST00000261833	1
KDM2B	ENSG00000089094	ENST00000377069	2
KDM2B	ENSG00000089094	ENST00000536437	1
KDM2B	ENSG00000089094	ENST00000377071	1
KATNAL1	ENSG00000102781	ENST00000414289	7
KATNAL1	ENSG00000102781	ENST00000380617	6
KATNAL1	ENSG00000102781	ENST00000441394	6
KATNAL1	ENSG00000102781	ENST00000380615	5
BRCA2	ENSG00000139618	ENST00000380152	2
BRCA2	ENSG00000139618	ENST00000544455	2
SOHLH2	ENSG00000120669	ENST00000379881	4
SOHLH2	ENSG00000120669	ENST00000554962	4
CCNA1	ENSG00000133101	ENST00000440264	1
CCNA1	ENSG00000133101	ENST00000418263	1
CCNA1	ENSG00000133101	ENST00000255465	2
UTP14C	ENSG00000253797	ENST00000521776	1
DIAPH3	ENSG00000139734	ENST00000400330	2
DIAPH3	ENSG00000139734	ENST00000400324	2
DZIP1	ENSG00000134874	ENST00000347108	4
DZIP1	ENSG00000134874	ENST00000361396	3
DZIP1	ENSG00000134874	ENST00000376829	3
BCL2L2	ENSG00000129473	ENST00000553824	0
BCL2L2	ENSG00000129473	ENST00000250405	2
BCL2L2	ENSG00000129473	ENST00000557236	2
BCL2L2	ENSG00000129473	ENST00000557579	2
BCL2L2	ENSG00000129473	ENST00000554635	0
REC8	ENSG00000100918	ENST00000311457	4
REC8	ENSG00000100918	ENST00000557806	3
REC8	ENSG00000100918	ENST00000559919	3
TSSK4	ENSG00000139908	ENST00000339917	9
TSSK4	ENSG00000139908	ENST00000556621	9
TSSK4	ENSG00000139908	ENST00000287913	9
SSTR1	ENSG00000139874	ENST00000267377	3
RPL10L	ENSG00000165496	ENST00000298283	8
STYX	ENSG00000198252	ENST00000442123	2
STYX	ENSG00000198252	ENST00000354586	2
ARID4A	ENSG00000032219	ENST00000355431	1
ARID4A	ENSG00000032219	ENST00000348476	0
ARID4A	ENSG00000032219	ENST00000395168	0
ARID4A	ENSG00000032219	ENST00000424658	3
ARID4A	ENSG00000032219	ENST00000431317	4
VIPAS39	ENSG00000151445	ENST00000343765	2
VIPAS39	ENSG00000151445	ENST00000557466	2
VIPAS39	ENSG00000151445	ENST00000448935	2
VIPAS39	ENSG00000151445	ENST00000553888	2
VIPAS39	ENSG00000151445	ENST00000557658	2
CATSPERB	ENSG00000133962	ENST00000256343	3
CATSPERB	ENSG00000133962	ENST00000556661	2
CATSPERB	ENSG00000133962	ENST00000554560	2
SERPINA5	ENSG00000188488	ENST00000554760	8
SERPINA5	ENSG00000188488	ENST00000556775	8
SERPINA5	ENSG00000188488	ENST00000553511	10
SERPINA5	ENSG00000188488	ENST00000554633	10
SERPINA5	ENSG00000188488	ENST00000555681	10
SERPINA5	ENSG00000188488	ENST00000554276	9
SERPINA5	ENSG00000188488	ENST00000557598	6
SERPINA5	ENSG00000188488	ENST00000556064	6
AK7	ENSG00000140057	ENST00000267584	3
YY1	ENSG00000100811	ENST00000554371	4
YY1	ENSG00000100811	ENST00000262238	3
TDRD9	ENSG00000156414	ENST00000409874	7
TDRD9	ENSG00000156414	ENST00000339063	7
TDRD9	ENSG00000156414	ENST00000557332	4
JAG2	ENSG00000184916	ENST00000331782	2
NPAP1	ENSG00000185823	ENST00000329468	7
HERC2	ENSG00000128731	ENST00000261609	0
TYRO3	ENSG00000092445	ENST00000263798	2
CATSPER2	ENSG00000166762	ENST00000432420	8
CATSPER2	ENSG00000166762	ENST00000321596	8
CATSPER2	ENSG00000166762	ENST00000354127	8
CATSPER2	ENSG00000166762	ENST00000396879	8
CATSPER2	ENSG00000166762	ENST00000409481	0
ELL3	ENSG00000128886	ENST00000319359	3
BCL2L10	ENSG00000137875	ENST00000260442	5
PIAS1	ENSG00000033800	ENST00000249636	2
CTSH	ENSG00000103811	ENST00000220166	7
ZSCAN2	ENSG00000176371	ENST00000448803	3
ZSCAN2	ENSG00000176371	ENST00000546275	3
ZSCAN2	ENSG00000176371	ENST00000546148	3
ZSCAN2	ENSG00000176371	ENST00000442073	3
ZSCAN2	ENSG00000176371	ENST00000334141	3
ZSCAN2	ENSG00000176371	ENST00000502939	3
ZSCAN2	ENSG00000176371	ENST00000379358	3
CHTF18	ENSG00000127586	ENST00000317063	4
CHTF18	ENSG00000127586	ENST00000262315	3
CHTF18	ENSG00000127586	ENST00000455171	3
SOX8	ENSG00000005513	ENST00000293894	4
RNF151	ENSG00000179580	ENST00000569714	10
RNF151	ENSG00000179580	ENST00000321392	3
PRSS21	ENSG00000007038	ENST00000455114	4
PRSS21	ENSG00000007038	ENST00000450020	4
PRSS21	ENSG00000007038	ENST00000005995	3
TNP2	ENSG00000178279	ENST00000312693	3
PRM3	ENSG00000178257	ENST00000327157	2
PRM2	ENSG00000122304	ENST00000241808	7
PRM1	ENSG00000175646	ENST00000312511	3
SIAH1	ENSG00000196470	ENST00000380006	2
SIAH1	ENSG00000196470	ENST00000356721	5
SIAH1	ENSG00000196470	ENST00000394725	3
SIAH1	ENSG00000196470	ENST00000563745	0
TSNAXIP1	ENSG00000102904	ENST00000388833	0
YBX2	ENSG00000006047	ENST00000007699	1
ODF4	ENSG00000184650	ENST00000328248	1
DNAH9	ENSG00000007174	ENST00000262442	4
DNAH9	ENSG00000007174	ENST00000608377	5
ALKBH5	ENSG00000091542	ENST00000399138	2
CCT6B	ENSG00000132141	ENST00000421975	5
CCT6B	ENSG00000132141	ENST00000436961	5
CCT6B	ENSG00000132141	ENST00000314144	5
GGNBP2	ENSG00000005955	ENST00000304718	5
GGNBP2	ENSG00000005955	ENST00000593016	6
RARA	ENSG00000131759	ENST00000577646	1
RARA	ENSG00000131759	ENST00000254066	1
RARA	ENSG00000131759	ENST00000394089	1
RARA	ENSG00000131759	ENST00000394081	0
KRT9	ENSG00000171403	ENST00000246662	4
SPATA32	ENSG00000184361	ENST00000543122	4
SPATA32	ENSG00000184361	ENST00000331780	4
MYCBPAP	ENSG00000136449	ENST00000323776	3
MYCBPAP	ENSG00000136449	ENST00000436259	2
SPATA20	ENSG00000006282	ENST00000006658	3
SPATA20	ENSG00000006282	ENST00000356488	3
SPATA20	ENSG00000006282	ENST00000393244	3
SPAG9	ENSG00000008294	ENST00000505279	2
SPAG9	ENSG00000008294	ENST00000262013	2
RAD51C	ENSG00000108384	ENST00000337432	4
TUBD1	ENSG00000108423	ENST00000376094	2
TUBD1	ENSG00000108423	ENST00000346141	0
TUBD1	ENSG00000108423	ENST00000394239	0
TUBD1	ENSG00000108423	ENST00000539018	0
TUBD1	ENSG00000108423	ENST00000340993	0
TUBD1	ENSG00000108423	ENST00000325752	0
ACE	ENSG00000159640	ENST00000538928	3
ACE	ENSG00000159640	ENST00000290866	3
ACE	ENSG00000159640	ENST00000428043	3
ACE	ENSG00000159640	ENST00000490216	2
ACE	ENSG00000159640	ENST00000290863	2
ACE	ENSG00000159640	ENST00000421982	2
SOX9	ENSG00000125398	ENST00000245479	1
SSTR2	ENSG00000180616	ENST00000357585	4
SSTR2	ENSG00000180616	ENST00000315332	2
ACOX1	ENSG00000161533	ENST00000587927	3
ACOX1	ENSG00000161533	ENST00000301608	2
ACOX1	ENSG00000161533	ENST00000293217	3
ACOX1	ENSG00000161533	ENST00000537812	3
FOXJ1	ENSG00000129654	ENST00000322957	2
TEX19	ENSG00000182459	ENST00000333437	7
TXNDC2	ENSG00000168454	ENST00000584255	4
TXNDC2	ENSG00000168454	ENST00000357775	4
TXNDC2	ENSG00000168454	ENST00000306084	4
TAF4B	ENSG00000141384	ENST00000269142	3
TAF4B	ENSG00000141384	ENST00000400466	2
THEG	ENSG00000105549	ENST00000346878	9
THEG	ENSG00000105549	ENST00000342640	11
FSTL3	ENSG00000070404	ENST00000166139	3
GAMT	ENSG00000130005	ENST00000252288	1
GAMT	ENSG00000130005	ENST00000447102	1
DAZAP1	ENSG00000071626	ENST00000233078	2
CATSPERD	ENSG00000174898	ENST00000381614	4
ACSBG2	ENSG00000130377	ENST00000591738	4
ACSBG2	ENSG00000130377	ENST00000588304	3
ACSBG2	ENSG00000130377	ENST00000588485	3
ACSBG2	ENSG00000130377	ENST00000588722	3
ACSBG2	ENSG00000130377	ENST00000591403	3
ACSBG2	ENSG00000130377	ENST00000586696	3
ACSBG2	ENSG00000130377	ENST00000589401	4
ACSBG2	ENSG00000130377	ENST00000252669	4
ZGLP1	ENSG00000220201	ENST00000403903	3
CALR	ENSG00000179218	ENST00000316448	3
NANOS3	ENSG00000187556	ENST00000339133	5
NANOS3	ENSG00000187556	ENST00000397555	5
ASF1B	ENSG00000105011	ENST00000263382	1
OR7C1	ENSG00000127530	ENST00000248073	5
CALR3	ENSG00000269058	ENST00000269881	4
INSL3	ENSG00000248099	ENST00000317306	12
TDRD12	ENSG00000173809	ENST00000444215	5
TDRD12	ENSG00000173809	ENST00000421545	8
CATSPERG	ENSG00000099338	ENST00000409235	5
CATSPERG	ENSG00000099338	ENST00000215069	7
GGN	ENSG00000179168	ENST00000334928	1
GGN	ENSG00000179168	ENST00000587676	1
AXL	ENSG00000167601	ENST00000301178	6
AXL	ENSG00000167601	ENST00000359092	6
PAFAH1B3	ENSG00000079462	ENST00000262890	3
PAFAH1B3	ENSG00000079462	ENST00000595530	3
PAFAH1B3	ENSG00000079462	ENST00000538771	3
PAFAH1B3	ENSG00000079462	ENST00000599778	3
ZNF296	ENSG00000170684	ENST00000303809	2
ERCC1	ENSG00000012061	ENST00000013807	8
ERCC1	ENSG00000012061	ENST00000592023	8
ERCC1	ENSG00000012061	ENST00000340192	8
ERCC1	ENSG00000012061	ENST00000300853	6
ERCC1	ENSG00000012061	ENST00000589165	6
ERCC1	ENSG00000012061	ENST00000589214	2
ERCC1	ENSG00000012061	ENST00000592083	3
FOXA3	ENSG00000170608	ENST00000302177	6
NANOS2	ENSG00000188425	ENST00000341294	2
ZNF541	ENSG00000118156	ENST00000391901	0
CCDC155	ENSG00000161609	ENST00000447857	12
CCDC155	ENSG00000161609	ENST00000594043	15
RAD21L1	ENSG00000244588	ENST00000402452	4
RAD21L1	ENSG00000244588	ENST00000409241	5
RAD21L1	ENSG00000244588	ENST00000246108	5
XRN2	ENSG00000088930	ENST00000377191	1
XRN2	ENSG00000088930	ENST00000430571	1
XRN2	ENSG00000088930	ENST00000539513	1
DEFB118	ENSG00000131068	ENST00000253381	0
BCL2L1	ENSG00000171552	ENST00000434194	2
BCL2L1	ENSG00000171552	ENST00000376062	1
BCL2L1	ENSG00000171552	ENST00000376055	1
BCL2L1	ENSG00000171552	ENST00000307677	1
BCL2L1	ENSG00000171552	ENST00000420653	1
BCL2L1	ENSG00000171552	ENST00000422920	2
BCL2L1	ENSG00000171552	ENST00000450273	0
BCL2L1	ENSG00000171552	ENST00000456404	0
BCL2L1	ENSG00000171552	ENST00000420488	0
SUN5	ENSG00000167098	ENST00000420875	1
SUN5	ENSG00000167098	ENST00000375519	1
SUN5	ENSG00000167098	ENST00000375523	2
SUN5	ENSG00000167098	ENST00000356173	2
E2F1	ENSG00000101412	ENST00000343380	6
SPAG4	ENSG00000061656	ENST00000374273	2
CNBD2	ENSG00000149646	ENST00000373973	5
CNBD2	ENSG00000149646	ENST00000349339	5
CNBD2	ENSG00000149646	ENST00000538900	5
NDRG3	ENSG00000101079	ENST00000373773	0
NDRG3	ENSG00000101079	ENST00000359675	2
NDRG3	ENSG00000101079	ENST00000540765	2
NDRG3	ENSG00000101079	ENST00000349004	2
ADIG	ENSG00000182035	ENST00000537425	3
WFDC2	ENSG00000101443	ENST00000372676	2
SPATA25	ENSG00000149634	ENST00000372519	4
SPATA2	ENSG00000158480	ENST00000422556	3
SPATA2	ENSG00000158480	ENST00000289431	5
SPATA2	ENSG00000158480	ENST00000543716	5
RNF114	ENSG00000124226	ENST00000244061	3
SPO11	ENSG00000054796	ENST00000371263	0
SPO11	ENSG00000054796	ENST00000345868	0
TCFL5	ENSG00000101190	ENST00000335351	12
SOD1	ENSG00000142168	ENST00000270142	4
HSF2BP	ENSG00000160207	ENST00000542962	4
HSF2BP	ENSG00000160207	ENST00000291560	2
DNMT3L	ENSG00000142182	ENST00000270172	4
GGT1	ENSG00000100031	ENST00000248923	1
GGT1	ENSG00000100031	ENST00000456869	7
GGT1	ENSG00000100031	ENST00000411974	7
GGT1	ENSG00000100031	ENST00000412658	12
GGT1	ENSG00000100031	ENST00000445029	13
GGT1	ENSG00000100031	ENST00000419133	12
GGT1	ENSG00000100031	ENST00000400382	12
GGT1	ENSG00000100031	ENST00000438643	12
GGT1	ENSG00000100031	ENST00000412898	12
GGT1	ENSG00000100031	ENST00000400380	12
GGT1	ENSG00000100031	ENST00000455483	12
GGT1	ENSG00000100031	ENST00000430289	13
GGT1	ENSG00000100031	ENST00000447416	5
GGT1	ENSG00000100031	ENST00000432867	5
GGT1	ENSG00000100031	ENST00000451366	5
GGT1	ENSG00000100031	ENST00000428855	5
GGT1	ENSG00000100031	ENST00000401885	5
GGT1	ENSG00000100031	ENST00000404532	5
GGT1	ENSG00000100031	ENST00000403838	5
PIWIL3	ENSG00000184571	ENST00000332271	11
GAL3ST1	ENSG00000128242	ENST00000453479	6
GAL3ST1	ENSG00000128242	ENST00000338911	2
GAL3ST1	ENSG00000128242	ENST00000437282	2
GAL3ST1	ENSG00000128242	ENST00000406955	2
GAL3ST1	ENSG00000128242	ENST00000401975	3
GAL3ST1	ENSG00000128242	ENST00000428682	3
GAL3ST1	ENSG00000128242	ENST00000423299	3
GAL3ST1	ENSG00000128242	ENST00000402321	4
GAL3ST1	ENSG00000128242	ENST00000441967	4
GAL3ST1	ENSG00000128242	ENST00000443111	1
GAL3ST1	ENSG00000128242	ENST00000426220	1
GAL3ST1	ENSG00000128242	ENST00000445645	1
GAL3ST1	ENSG00000128242	ENST00000416358	1
GAL3ST1	ENSG00000128242	ENST00000411821	1
GAL3ST1	ENSG00000128242	ENST00000402369	2
GAL3ST1	ENSG00000128242	ENST00000406361	2
LIMK2	ENSG00000182541	ENST00000444929	4
LIMK2	ENSG00000182541	ENST00000331728	4
LIMK2	ENSG00000182541	ENST00000333611	0
PATZ1	ENSG00000100105	ENST00000215919	2
PATZ1	ENSG00000100105	ENST00000266269	4
SSTR3	ENSG00000183473	ENST00000402501	3
SSTR3	ENSG00000183473	ENST00000328544	2
DMC1	ENSG00000100206	ENST00000428462	8
DMC1	ENSG00000100206	ENST00000439567	4
DMC1	ENSG00000100206	ENST00000216024	4
BIK	ENSG00000100290	ENST00000216115	4
MOV10L1	ENSG00000073146	ENST00000545383	10
MOV10L1	ENSG00000073146	ENST00000262794	9
MOV10L1	ENSG00000073146	ENST00000395858	10
MOV10L1	ENSG00000073146	ENST00000395843	10
MOV10L1	ENSG00000073146	ENST00000540615	10
MOV10L1	ENSG00000073146	ENST00000395852	3
MOV10L1	ENSG00000073146	ENST00000354853	5
SBF1	ENSG00000100241	ENST00000380817	9
SBF1	ENSG00000100241	ENST00000390679	9
VCX	ENSG00000182583	ENST00000341408	0
PRDX4	ENSG00000123131	ENST00000379349	1
PRDX4	ENSG00000123131	ENST00000379341	3
PRDX4	ENSG00000123131	ENST00000379331	1
PRDX4	ENSG00000123131	ENST00000439422	1
PCYT1B	ENSG00000102230	ENST00000356768	3
PCYT1B	ENSG00000102230	ENST00000379144	3
PCYT1B	ENSG00000102230	ENST00000379145	0
NR0B1	ENSG00000169297	ENST00000378963	1
NR0B1	ENSG00000169297	ENST00000453287	0
NR0B1	ENSG00000169297	ENST00000378970	1
CDK16	ENSG00000102225	ENST00000457458	0
CDK16	ENSG00000102225	ENST00000522883	0
CDK16	ENSG00000102225	ENST00000357227	0
CDK16	ENSG00000102225	ENST00000519758	0
CDK16	ENSG00000102225	ENST00000520893	0
CDK16	ENSG00000102225	ENST00000518391	0
CDK16	ENSG00000102225	ENST00000518022	1
CDK16	ENSG00000102225	ENST00000276052	1
ATRX	ENSG00000085224	ENST00000400866	2
ATRX	ENSG00000085224	ENST00000373341	0
ATRX	ENSG00000085224	ENST00000373344	0
CYLC1	ENSG00000183035	ENST00000329312	1
TAF7L	ENSG00000102387	ENST00000324762	0
TAF7L	ENSG00000102387	ENST00000356784	0
TAF7L	ENSG00000102387	ENST00000372907	0
TAF7L	ENSG00000102387	ENST00000372905	0
AKAP14	ENSG00000186471	ENST00000371423	0
AKAP14	ENSG00000186471	ENST00000394594	0
AKAP14	ENSG00000186471	ENST00000371422	0
SPANXA1	ENSG00000198021	ENST00000370519	1
SPANXA2	ENSG00000203926	ENST00000370518	0
CETN2	ENSG00000147400	ENST00000370277	1
BCAP31	ENSG00000185825	ENST00000430088	0
BCAP31	ENSG00000185825	ENST00000423827	0
BCAP31	ENSG00000185825	ENST00000458587	0
BCAP31	ENSG00000185825	ENST00000416815	0
BCAP31	ENSG00000185825	ENST00000441714	0
BCAP31	ENSG00000185825	ENST00000429550	0
BCAP31	ENSG00000185825	ENST00000345046	1
FAM50A	ENSG00000071859	ENST00000393600	0
TSPY2	ENSG00000168757	ENST00000320701	0
TSPY4	ENSG00000233803	ENST00000426950	0
TSPY4	ENSG00000233803	ENST00000383008	0
TSPY8	ENSG00000229549	ENST00000287721	0
TSPY8	ENSG00000229549	ENST00000383000	0
TSPY8	ENSG00000229549	ENST00000537415	0
TSPY3	ENSG00000228927	ENST00000457222	0
TSPY3	ENSG00000228927	ENST00000427871	0
TSPY1	ENSG00000258992	ENST00000451548	0
TSPY10	ENSG00000236424	ENST00000428845	0
TSPY10	ENSG00000236424	ENST00000444056	0
USP9Y	ENSG00000114374	ENST00000338981	0
USP9Y	ENSG00000114374	ENST00000453031	0
CDY2B	ENSG00000129873	ENST00000544303	0
CDY2B	ENSG00000129873	ENST00000382867	0
CDY2A	ENSG00000182415	ENST00000250838	0
CDY2A	ENSG00000182415	ENST00000426790	0
RBMY1B	ENSG00000242875	ENST00000383020	0
RBMY1F	ENSG00000169800	ENST00000303766	0
RBMY1F	ENSG00000169800	ENST00000454978	0
RBMY1J	ENSG00000226941	ENST00000414629	0
RBMY1J	ENSG00000226941	ENST00000250831	0
BPY2	ENSG00000183753	ENST00000602732	0
BPY2	ENSG00000183753	ENST00000331070	0
DAZ1	ENSG00000188120	ENST00000382510	0
DAZ1	ENSG00000188120	ENST00000426000	0
DAZ1	ENSG00000188120	ENST00000540248	0
DAZ1	ENSG00000188120	ENST00000405239	0
DAZ2	ENSG00000205944	ENST00000382449	0
DAZ2	ENSG00000205944	ENST00000382434	0
DAZ2	ENSG00000205944	ENST00000449947	0
DAZ2	ENSG00000205944	ENST00000382294	0
DAZ2	ENSG00000205944	ENST00000382433	0
DAZ2	ENSG00000205944	ENST00000382431	0
CDY1B	ENSG00000172352	ENST00000306882	0
CDY1B	ENSG00000172352	ENST00000382407	0
BPY2B	ENSG00000183795	ENST00000602770	0
BPY2B	ENSG00000183795	ENST00000382392	0
DAZ3	ENSG00000187191	ENST00000400212	0
DAZ3	ENSG00000187191	ENST00000315357	0
DAZ3	ENSG00000187191	ENST00000446723	0
DAZ3	ENSG00000187191	ENST00000382365	0
DAZ4	ENSG00000205916	ENST00000382432	0
DAZ4	ENSG00000205916	ENST00000382314	0
DAZ4	ENSG00000205916	ENST00000415508	0
DAZ4	ENSG00000205916	ENST00000440066	0
DAZ4	ENSG00000205916	ENST00000400494	0
DAZ4	ENSG00000205916	ENST00000382296	0
BPY2C	ENSG00000185894	ENST00000382287	0
BPY2C	ENSG00000185894	ENST00000602680	0
CDY1	ENSG00000172288	ENST00000361963	0
CDY1	ENSG00000172288	ENST00000306609	0

## Sheet: readme
sheets All_TF, HTH, ZNF, Other, Basic, Chr_mod & Sperm contain informations:
	columns A-D - the list of analyzed transcripts and counts of SNPs per [-600 +100] region relative to transcription start site
	column H - the list of unique HGNC Gene Names
	columns J-M - counts of genes/transcripts
