# Supplementary material for: Human Genes Encoding Transcription Factors and Chromatin-Modifying Proteins Have Low Levels of Promoter Polymorphism: A Study of 1000 Genomes Project Data
Source: Int J Genomics. 2015 Aug 31;2015:260159. doi: 10.1155/2015/260159 (PMC4568383; doi:10.1155/2015/260159)
Supplement: Supplementary file 1 — Figure S1: Human promoter variability in the whole-genome dataset (Table 1) compared with promoter variability in datasets from chromosomes 1-22 (autosomes) or chromosome X, or chromosome Y. Cumulative percentage plots for the fractions of human transcripts, possessing certain numbers of SNPs in [–600/+100] regions relative to annotated transcription start sites are presented. Figure S2: The comparison of SNP content distributions in upstream regions of seven groups of human transcripts (All TFs, ZNF, HTH, Basic, Other, Chr Mod, Sperm) from chromosomes 1-22 (transcripts from the chromosomes X and Y were excluded from analysis) with the distribution in the whole-genome dataset from which transcripts located on the chromosomes X and Y were also excluded. The significances of the t test (Y axis), which compares SNP contents in seven groups of human transcripts with the content in the whole genome dataset as a function of the SNP content (X axis) are presented. Panel A: All TFs, ZNF, HTH, Basic, Other; Panel B: Chr Mod; Panel C: Sperm. Table S1:Datasets of transcripts, described in the Table 1: All TFs, ZNF, HTH, Basic, Other, Chr Mod, Sperm. HGNC Gene Name, Ensembl Gene ID, Ensembl, Transcript ID, SNP count are presented. Table S2:The full list of the most overrepresented (fold enrichment > 1.5 and p value < 10-3) GO categories for each SNP-depleted dataset. Table S3: The joint list of overrepresented (fold enrichment > 1.5 and p value < 10-3) GO terms revealed from analysis of all SNP-depleted datasets (The duplicates of GO terms were removed). Columns from C to I present the occurrence of each GO term among the overrepresented terms for each SNP-depleted dataset. [file 260159.f1.zip › Tables_S2_S3.xls]

## Sheet: Table_S2
Table S2
The full list of the most overrepresented		Color legend
GO categories for each SNP-depleted dataset.			Chromatin organization
In all cases, fold enrichment > 1.5 and significance P<10-3			Transcription
			Multicellular organism reproduction / gamete generation
			Regulation of organelle organization
			Signal transduction							Bonferroni	Benjamini	FDR																								Bonferroni	Benjamini	FDR
SNP-depleted within [-300/+100]										0.000198112	4.95318e-05	8.70913e-05																								4.87396e-05	4.87396e-05	2.53134e-05
Term	Count	%	PValue	Genes	Fold Enrichment					0.0347805	0.00186141	0.0155592																								0.00685379	0.00228984	0.00357168
GO:0051129~negative regulation of cellular component organization	68	1.22722	1.07303e-05	DLC1, RTN4, PLXNA3, LIMA1, NRP1, ACVRL1, SNCA, CAPZA1, RHOQ, MBP, ARHGAP6, EIF4EBP1, S1PR1, TMSB15A, PACSIN3, PACSIN2, SEMA3F, TMSB15B, SEMA3A, TPR, SCAMP5, ARHGEF2, ARHGEF1, PTPRF, MID1IP1, TMSB4X, TMSB4Y, ADD2, ADD1, TRIOBP, SHROOM2, CLU, APOC1, CAPZB, POT1, EPHB2, NR1H2, IRAK3, PTK2, SET, NPM1, AVIL, CLASP1, CLASP2, DNMT3B, ARHGDIA, TERF2, APC, NR1H3, SMAD7, SMAD6, MAP1A, SPTBN4, MID1, FOXP3, …	1.59768					0.0802682	0.0037961	0.0367728																								0.131338	0.0155229	0.073098
GO:0008624~induction of apoptosis by extracellular signals	54	0.974553	7.80747e-05	DEDD, ITSN1, ADORA1, DAXX, CRADD, MCF2L, BTK, MAGED1, ARHGAP4, TIAM2, TIAM1, NGFRAP1, PSENEN, CASP2, RPS27A, SPN, ARHGEF3, ARHGEF2, ARHGEF7, ARHGEF6, ARHGEF16, NDUFA13, ARHGEF9, ARHGEF12, ECT2, ARHGEF11, DAPK1, CD38, SSTR3, RASGRF1, PSEN2, UBC, SORT1, MAPK9, BID, FGD1, APH1A, ADORA2A, AKAP13, TIMP3, SOS1, PTH, SOS2, FGD3, FGD4, CFLAR, NGEF, VAV3, MCF2, TRIO, VAV2, VAV1, NCSTN, DAP3	1.60859					0.0888019	0.00403509	0.0408687																								0.234862	0.0156237	0.138932
GO:0035023~regulation of Rho protein signal transduction	49	0.884317	7.86889e-05	DLC1, LPAR2, SLC26A10, ITSN1, MCF2L, TIAM2, TIAM1, ARHGEF3, ARHGEF2, ARHGEF1, RALBP1, ARHGEF7, ARHGEF6, ARHGEF5, SCAI, ARHGEF16, ARHGEF15, ARHGEF9, ARHGEF12, ECT2, FARP1, ARHGEF11, RASGRF1, FGD1, AKAP13, CDH2, SCRIB, PLEKHG4, MCF2L2, PLEKHG3, PTK2B, PLEKHG7, SOS1, SOS2, PAFAH1B1, ARHGEF10L, FGD3, FGD4, NGEF, VAV3, MCF2, TRIO, VAV2, VAV1, DNMBP, TSC1, SYDE1, MTOR, ARAP1	1.65131					0.0931483	0.00390341	0.0429696																								0.234862	0.0156237	0.138932
GO:0010551~regulation of specific transcription from RNA polymerase II promoter	47	0.848222	8.28379e-05	MEF2C, PPARA, HMGB2, THRA, TFE3, TAF9B, PPARG, TFEB, RHOQ, NFKB1, SRF, TCF7L2, CTNNB1, NR1H2, TAL1, GATA2, GATA6, NKX6-2, TAF9, GFI1, BCOR, TCF3, ARHGEF10L, NR1H3, TBL1XR1, WDTC1, LBX1, IKZF2, SMAD7, SMAD3, KAT5, FOXP3, USF2, SCAP, HDAC5, HDAC4, HHEX, DLX1, HNF4A, HDAC1, ETS1, TBL1X, HDAC9, SMARCA2, NCOR1, ENG, SMARCA4	1.66816					0.154774	0.00644647	0.0738855																								0.809214	0.0595113	0.856659
GO:0030509~BMP signaling pathway	26	0.469229	0.000186801	TWSG1, BMP10, NOG, USP9Y, GDF7, USP9X, FST, BMPR2, FSTL1, GREM2, UBE2D3, ZFYVE16, UBE2D1, BMP4, SMAD7, SMAD6, SMAD5, SMAD4, SMAD1, ACVR2B, CHRDL1, TGFBR3, BMPR1B, ENG, CHRD, ACVR1	1.97147					0.632977	0.0260323	0.439617																								0.838589	0.0630597	0.942712
GO:0010639~negative regulation of organelle organization	41	0.739939	0.000255914	DLC1, TRIOBP, SHROOM2, LIMA1, CAPZA1, SNCA, CAPZB, POT1, ARHGAP6, SET, S1PR1, TMSB15A, TMSB15B, NPM1, AVIL, CLASP1, CLASP2, TPR, DNMT3B, TERF2, APC, ARHGEF2, MAP1A, SPTBN4, MID1IP1, MID1, FOXP3, BRCA1, ATM, TRIM54, PSMG2, MAP2, CAPG, SPTBN2, MAP4, DNMT1, TMSB4X, TMSB4Y, ADD2, ARAP1, HDAC6, ADD1	1.66816					0.646048	0.0262791	0.455486																								0.838589	0.0630597	0.942712
GO:0051494~negative regulation of cytoskeleton organization	30	0.541419	0.000340894	DLC1, TRIOBP, LIMA1, SHROOM2, CAPZA1, CAPZB, ARHGAP6, S1PR1, TMSB15A, TMSB15B, AVIL, CLASP1, CLASP2, APC, ARHGEF2, MAP1A, SPTBN4, MID1IP1, MID1, BRCA1, TRIM54, CAPG, MAP2, SPTBN2, MAP4, TMSB4X, TMSB4Y, ARAP1, ADD2, ADD1, HDAC6	1.81981					0.699949	0.0289342	0.527749																								0.878193	0.0677713	1.08743
GO:0043407~negative regulation of MAP kinase activity	22	0.39704	0.000371583	CAV1, NF1, DUSP22, PDCD4, TP73, SPRY4, IRAK3, SPRY2, CBLC, DUSP19, SPRY1, NUP62, RGS3, APOE, DUSP16, TSC2, SPRED2, SPRED3, MAPK8IP1, DUSP9, DUSP8, DUSP6	2.03887					0.884993	0.0449735	0.946163																								0.902436	0.0701448	1.20137
GO:0051318~G1 phase	15	0.270709	0.00055394	CDC6, PPP2R3B, TBRG4, CDK6, RB1, ZNF655, CDC25C, FOXO4, CDK2, CDKN1C, CDC123, MTBP, MDM2, TCF3, MAP3K11	2.38309					0.982949	0.0666816	1.77377																								0.903385	0.0683693	1.20639
GO:0010552~positive regulation of specific transcription from RNA polymerase II promoter	30	0.541419	0.000738096	MEF2C, HMGB2, PPARG, TFE3, TFEB, RHOQ, SRF, TCF7L2, CTNNB1, NR1H2, GATA2, GATA6, TAF9, TCF3, ARHGEF10L, NR1H3, IKZF2, SMAD3, FOXP3, USF2, SCAP, HDAC5, HDAC4, HHEX, HNF4A, HDAC1, ETS1, ENG, SMARCA2, SMARCA4	1.75596																															0.935576	0.0774879	1.41409
GO:0007265~Ras protein signal transduction	48	0.86627	0.000916533	GRAP, GRB2, MRAS, WASF2, MAPKAPK3, RTKN, MAPKAPK2, SRC, RGL2, ARHGAP4, ARHGAP6, ARHGAP5, RASGRP3, ROPN1B, APOE, SOS1, PTH, ARHGAP1, RALB, RRAS, RALA, SHC1, CDC42EP4, SHC3, ARHGDIA, DHCR24, ARHGEF3, ARHGEF1, LIMK1, RREB1, NF1, G3BP2, ARHGAP29, RALGDS, ELMO1, ARHGEF11, LAT, CDH13, DOK1, PLCE1, DOK2, CRKL, SGSM3, GNB1, CFL1, SDCBP, KSR1, GRAP2	1.52518
SNP-depleted within [-400/+100]
Term	Count	%	PValue	Genes	Fold Enrichment
GO:0051129~negative regulation of cellular component organization	56	1.341	8.60474e-06	DLC1, RTN4, LIMA1, PLXNA3, CAPZA1, RHOQ, MBP, EIF4EBP1, ARHGAP6, S1PR1, TMSB15A, PACSIN3, PACSIN2, SEMA3F, TMSB15B, SCAMP5, ARHGEF2, ARHGEF1, PTPRF, MID1IP1, TMSB4X, TMSB4Y, ADD2, ADD1, TRIOBP, SHROOM2, CLU, APOC1, CAPZB, POT1, NR1H2, IRAK3, PTK2, SET, AVIL, CLASP1, CLASP2, DNMT3B, ARHGDIA, TERF2, APC, NR1H3, SMAD7, MAP1A, SPTBN4, MID1, FOXP3, PSMG2, MAP2, CAPG, SPTBN2, TGFBR3, DNMT1, MAP4, OMG, …	1.7539
GO:0051494~negative regulation of cytoskeleton organization	28	0.670498	1.2872e-05	DLC1, TRIOBP, LIMA1, SHROOM2, CAPZA1, CAPZB, ARHGAP6, S1PR1, TMSB15A, TMSB15B, AVIL, CLASP1, CLASP2, APC, ARHGEF2, MAP1A, SPTBN4, MID1IP1, MID1, CAPG, MAP2, SPTBN2, MAP4, TMSB4X, TMSB4Y, ARAP1, ADD2, ADD1, HDAC6	2.26412
GO:0016568~chromatin modification	93	2.22701	1.43035e-05	BMI1, KDM6A, UTY, MORF4L2, HIRA, CBX4, CTCF, CBX8, CBX6, BRPF3, SMARCD1, TLK1, TLK2, KDM5C, KDM5D, TBL1XR1, UBE2A, BRCC3, HDAC10, ARID1A, RB1, RBBP7, UBN1, SUV420H2, EYA3, EYA1, TAF12, KDM2A, SMARCE1, HUWE1, SMARCA5, BRDT, USP22, RUVBL1, SMARCA1, NSD1, SUDS3, MAP3K12, KDM6B, SUV420H1, SUPT6H, SMARCA4, SETD1B, HAT1, TRIM16, VPS72, CHD8, TSPYL2, NPM2, PBRM1, ACTL6A, TAF9, KDM3B, CHD6, BCOR, ASF1B, …	1.50951
GO:0051493~regulation of cytoskeleton organization	53	1.26916	2.27674e-05	DLC1, XPO1, LIMA1, PDGFA, EDN1, CAPZA1, RHOQ, CTNNB1, ARHGAP6, S1PR1, TMSB15A, TMSB15B, ARHGEF2, MID1IP1, NEBL, ARPC1A, NCK2, ARPC1B, NCK1, CFL1, AKAP5, TMSB4X, TMSB4Y, DST, ADD2, ADD1, TRIOBP, CAV2, SHROOM2, CAV1, TAC1, CAPZB, MYCBP2, CDC42EP2, MACF1, AVIL, CLASP1, SKA2, CLASP2, ARHGEF10L, APC, MAP1A, SPTBN4, SMAD3, MID1, PLK4, MAP2, CAPG, TSC2, SPTBN2, MAP4, AMOT, ARAP1, HDAC6	1.73317
GO:0043242~negative regulation of protein complex disassembly	22	0.52682	5.27088e-05	TRIOBP, ARHGEF2, LIMA1, SHROOM2, MAP1A, SPTBN4, CAPZA1, MID1IP1, MID1, CAPZB, IRAK3, CAPG, MAP2, SPTBN2, AVIL, MAP4, CLASP1, CLASP2, ADD2, ADD1, APC, HDAC6	2.3864
GO:0010639~negative regulation of organelle organization	35	0.838123	9.03686e-05	DLC1, TRIOBP, LIMA1, SHROOM2, CAPZA1, CAPZB, POT1, ARHGAP6, SET, S1PR1, TMSB15A, TMSB15B, AVIL, CLASP1, CLASP2, DNMT3B, TERF2, APC, ARHGEF2, MAP1A, SPTBN4, MID1IP1, MID1, FOXP3, PSMG2, CAPG, MAP2, SPTBN2, DNMT1, MAP4, TMSB4X, TMSB4Y, ARAP1, ADD2, ADD1, HDAC6	1.89827
GO:0010551~regulation of specific transcription from RNA polymerase II promoter	38	0.909962	0.000165293	MEF2C, PPARA, HMGB2, THRA, TFE3, PPARG, TAF9B, TFEB, RHOQ, NFKB1, SRF, TCF7L2, CTNNB1, NR1H2, GATA2, TAF9, GFI1, BCOR, TCF3, ARHGEF10L, NR1H3, TBL1XR1, IKZF2, SMAD7, SMAD3, KAT5, FOXP3, SCAP, HDAC4, DLX1, HNF4A, HDAC1, ETS1, HDAC9, TBL1X, NCOR1, ENG, SMARCA4	1.79788
GO:0043244~regulation of protein complex disassembly	24	0.574713	0.000281103	TRIOBP, ARHGEF2, LIMA1, SHROOM2, MAP1A, SPTBN4, CAPZA1, MID1IP1, MID1, CAPZB, IRAK3, CAPG, CFL1, MAP2, SPTBN2, AVIL, MGEA5, MAP4, CLASP1, CLASP2, ADD2, ADD1, APC, HDAC6	2.09289
GO:0035023~regulation of Rho protein signal transduction	38	0.909962	0.000548789	DLC1, FGD1, AKAP13, LPAR2, CDH2, SLC26A10, ITSN1, SCRIB, PLEKHG4, PLEKHG3, TIAM2, TIAM1, PLEKHG7, SOS1, SOS2, PAFAH1B1, ARHGEF10L, NGEF, ARHGEF3, ARHGEF2, VAV3, ARHGEF1, MCF2, ARHGEF7, ARHGEF6, ARHGEF5, ARHGEF16, SCAI, TRIO, ARHGEF15, ARHGEF9, ARHGEF12, VAV2, VAV1, ECT2, DNMBP, ARHGEF11, ARAP1	1.70708
GO:0010552~positive regulation of specific transcription from RNA polymerase II promoter	25	0.598659	0.000722137	MEF2C, HMGB2, PPARG, TFE3, TFEB, RHOQ, TCF7L2, SRF, CTNNB1, NR1H2, GATA2, TAF9, TCF3, ARHGEF10L, NR1H3, IKZF2, SMAD3, FOXP3, SCAP, HDAC4, HNF4A, HDAC1, ETS1, ENG, SMARCA4	1.95061
GO:0043407~negative regulation of MAP kinase activity	18	0.431034	0.000907533	CAV1, NF1, DUSP22, PDCD4, TP73, SPRY4, IRAK3, CBLC, SPRY1, NUP62, RGS3, DUSP16, TSC2, SPRED2, SPRED3, DUSP9, DUSP8, DUSP6	2.22369
GO:0008624~induction of apoptosis by extracellular signals	41	0.981801	0.000956166	FGD1, ADORA2A, DEDD, AKAP13, ITSN1, ADORA1, TIMP3, DAXX, CRADD, BTK, MAGED1, ARHGAP4, TIAM2, TIAM1, SOS1, SOS2, NGFRAP1, PSENEN, CASP2, SPN, NGEF, CFLAR, ARHGEF3, ARHGEF2, VAV3, MCF2, ARHGEF7, ARHGEF6, ARHGEF16, NDUFA13, TRIO, ARHGEF9, ARHGEF12, VAV2, VAV1, ECT2, ARHGEF11, CD38, PSEN2, MAPK9, DAP3	1.62806
SNP-depleted within [-500/+100]
Term	Count	%	PValue	Genes	Fold Enrichment
GO:0006325~chromatin organization	105	3.23475	3.70735e-07	MORF4L2, CBX4, CBX8, HIST1H2BO, BRPF3, SMARCD1, TLK1, TLK2, H1F0, SATB1, ARID1A, KDM2A, SMARCE1, HUWE1, SMARCA5, SMARCA1, SUDS3, SUV420H1, SUPT6H, HMGB2, SETD1B, SOX2, VPS72, H2AFB2, H2AFB1, NPM2, CDY1B, PBRM1, BCOR, HIST1H4I, DNMT3B, HIST2H3A, SETDB1, DNMT3A, NFE2, CREBBP, SUV39H1, WHSC1, FOXP3, KAT5, EHMT2, HIST2H3C, UIMC1, MSL3, HDAC4, HDAC1, CDY2B, DNMT1, H3F3A, CDY2A, VCX, HDAC9, HDAC8, NCOR…	1.60438
GO:0045892~negative regulation of transcription, DNA-dependent	99	3.04991	7.80001e-07	MEF2C, JDP2, FST, CBX4, MAF1, CTNNB1, SIN3A, RARB, SATB1, ZHX1, MECP2, ZHX3, NR0B1, FOXN3, HOXD8, SMARCE1, TGIF1, PRDM1, TAF9B, SOX2, VPS72, HEXIM2, ATN1, HEXIM1, BCOR, TCF4, DNMT3B, DNMT3A, SMAD7, RFX5, SMAD4, SMAD2, FOXP3, KAT5, FOXP2, CDKN1C, HDAC4, DLX1, HDAC1, DNMT1, HDAC9, RBPJ, HDAC8, ENG, NCOR1, CRYM, PPARA, ARID4A, HELT, E2F6, PPARG, NR6A1, NFKB1, CTCF, ZEB1, DAXX, CBFA2T2, ZNF345, KCNIP…	1.60619
GO:0051253~negative regulation of RNA metabolic process	99	3.04991	1.76152e-06	MEF2C, JDP2, FST, CBX4, MAF1, CTNNB1, SIN3A, RARB, SATB1, ZHX1, MECP2, ZHX3, NR0B1, FOXN3, HOXD8, SMARCE1, TGIF1, PRDM1, TAF9B, SOX2, VPS72, HEXIM2, ATN1, HEXIM1, BCOR, TCF4, DNMT3B, DNMT3A, SMAD7, RFX5, SMAD4, SMAD2, FOXP3, KAT5, FOXP2, CDKN1C, HDAC4, DLX1, HDAC1, DNMT1, HDAC9, RBPJ, HDAC8, ENG, NCOR1, CRYM, PPARA, ARID4A, HELT, E2F6, PPARG, NR6A1, NFKB1, CTCF, ZEB1, DAXX, CBFA2T2, ZNF345, KCNIP…	1.57956
GO:0016568~chromatin modification	77	2.37215	9.80915e-06	BMI1, KDM6A, UTY, MORF4L2, CBX4, CTCF, CBX8, BRPF3, SMARCD1, TLK1, TLK2, KDM5C, KDM5D, TBL1XR1, UBE2A, BRCC3, ARID1A, RB1, RBBP7, EYA3, TAF12, KDM2A, SMARCE1, HUWE1, SMARCA5, USP22, RUVBL1, SMARCA1, NSD1, SUDS3, MAP3K12, KDM6B, SUV420H1, SUPT6H, SETD1B, HAT1, TRIM16, VPS72, TSPYL2, NPM2, PBRM1, ACTL6A, KDM3B, BCOR, CHD6, DNMT3B, BAZ2A, TERF2, SETDB1, DNMT3A, L3MBTL2, NASP, CREBBP, SUV39H1, WHSC1,…	1.62312
GO:0051129~negative regulation of cellular component organization	46	1.41713	1.92312e-05	DLC1, RTN4, TRIOBP, SHROOM2, PLXNA3, LIMA1, CLU, APOC1, RHOQ, POT1, MBP, NR1H2, IRAK3, ARHGAP6, PTK2, S1PR1, TMSB15A, PACSIN3, PACSIN2, SEMA3F, TMSB15B, DNMT3B, TERF2, ARHGDIA, NR1H3, APC, ARHGEF2, ARHGEF1, PTPRF, SMAD7, MAP1A, SPTBN4, MID1IP1, MID1, FOXP3, MAP2, CAPG, SPTBN2, TGFBR3, MAP4, DNMT1, TMSB4X, TMSB4Y, ADD2, ARAP1, HDAC6, ADD1	1.87103
GO:0051494~negative regulation of cytoskeleton organization	23	0.708564	5.82393e-05	DLC1, TRIOBP, ARHGEF2, LIMA1, SHROOM2, MAP1A, SPTBN4, MID1IP1, MID1, ARHGAP6, S1PR1, TMSB15A, TMSB15B, CAPG, MAP2, SPTBN2, MAP4, TMSB4X, TMSB4Y, ARAP1, ADD2, ADD1, APC, HDAC6	2.41533
GO:0051493~regulation of cytoskeleton organization	42	1.2939	0.00015363	DLC1, TRIOBP, XPO1, SHROOM2, CAV1, LIMA1, EDN1, RHOQ, TAC1, CTNNB1, ARHGAP6, CDC42EP2, S1PR1, MACF1, TMSB15A, TMSB15B, SKA2, ARHGEF10L, APC, ARHGEF2, MAP1A, SPTBN4, MID1IP1, MID1, ARPC1A, NCK2, ARPC1B, PLK4, NCK1, CFL1, MAP2, TSC2, CAPG, SPTBN2, AMOT, MAP4, TMSB4X, TMSB4Y, DST, ADD2, ARAP1, HDAC6, ADD1	1.7837
GO:0010551~regulation of specific transcription from RNA polymerase II promoter	32	0.985829	0.000161554	MEF2C, PPARA, HMGB2, THRA, PPARG, TAF9B, TFE3, TFEB, RHOQ, NFKB1, SRF, TCF7L2, CTNNB1, NR1H2, GFI1, BCOR, TCF3, ARHGEF10L, NR1H3, TBL1XR1, IKZF2, SMAD7, FOXP3, KAT5, HDAC4, DLX1, HNF4A, HDAC1, HDAC9, TBL1X, NCOR1, ENG	1.96622
GO:0032583~regulation of gene-specific transcription	41	1.26309	0.000231476	MEF2C, PPARA, HMGB2, THRA, TFE3, TAF9B, PPARG, TFEB, RHOQ, NFKB1, TRIM16, SRF, TCF7L2, CTNNB1, NR1H2, GFI1, NR2F2, BCOR, TCF3, ARHGEF10L, NR1H3, TBL1XR1, IKZF2, TNFSF4, SMAD7, SMAD2, ESR2, KAT5, FOXP3, CDKN1C, HDAC4, DLX1, HNF4A, HDAC1, HDAC9, SMARCA1, NR5A2, TBL1X, MAPRE3, NCOR1, ENG	1.76722
GO:0000122~negative regulation of transcription from RNA polymerase II promoter	70	2.1565	0.000231872	MEF2C, PPARA, JDP2, HELT, E2F6, FST, NR6A1, PPARG, CBX4, NFKB1, ZEB1, ZNF345, CTNNB1, KCNIP3, SAP30, SIN3A, SOX15, RARB, NR2F2, ZNF281, ATF7IP, SATB1, TBL1XR1, MECP2, RB1, NR0B1, MBD2, RBBP7, NRIP1, CTNNBIP1, HOXD8, NCOA2, HIPK2, TGIF1, ZFPM2, PRDM1, MDM4, LCOR, NSD1, KDM6B, ZMYND11, SOX2, TAF9B, VPS72, ATN1, HEXIM2, HEXIM1, GFI1, BCOR, TCF4, DNMT3A, ZBTB7A, RFX5, JARID2, SMAD7, KAT5, FOXP2, CDKN…	1.51994
GO:0010639~negative regulation of organelle organization	28	0.8626	0.000428571	DLC1, TRIOBP, LIMA1, SHROOM2, POT1, ARHGAP6, S1PR1, TMSB15A, TMSB15B, DNMT3B, TERF2, APC, ARHGEF2, MAP1A, SPTBN4, MID1IP1, MID1, FOXP3, CAPG, MAP2, SPTBN2, DNMT1, MAP4, TMSB4X, TMSB4Y, ARAP1, ADD2, ADD1, HDAC6	1.97222
GO:0030521~androgen receptor signaling pathway	16	0.492914	0.000514943	AR, GRIP1, FHL2, MED24, ARID1A, MED14, RB1, KAT5, DAXX, NRIP1, CTNNB1, NCOA1, THRAP3, TGFB1I1, PMEPA1, RNF14	2.56701
GO:0043242~negative regulation of protein complex disassembly	17	0.523722	0.000805427	TRIOBP, ARHGEF2, LIMA1, SHROOM2, MAP1A, SPTBN4, MID1IP1, MID1, IRAK3, MAP2, CAPG, SPTBN2, MAP4, ADD2, ADD1, APC, HDAC6	2.39483
GO:0033043~regulation of organelle organization	57	1.75601	0.000978918	DLC1, XPO1, EDN3, LIMA1, EDN1, RHOQ, CTCF, CTNNB1, ARHGAP6, S1PR1, TMSB15A, TMSB15B, TLK1, TLK2, LTB, IL1A, ARHGEF2, MID1IP1, HERC2, ARPC1A, NCK2, ARPC1B, NCK1, CFL1, TMSB4X, TMSB4Y, DST, ADD2, NEK6, ADD1, TRIOBP, SHROOM2, CAV1, TAC1, ANAPC10, POT1, PIN1, CDC42EP2, MACF1, SKA2, DNMT3B, TERF2, ARHGEF10L, APC, MAP1A, SPTBN4, MID1, FOXP3, PLK4, MAP2, CAPG, TSC2, SPTBN2, AMOT, DNMT1, MAP4, ARAP1, HDA…	1.51714
SNP-depleted within [-600/+100]
Term	Count	%	PValue	Genes	Fold Enrichment
GO:0006325~chromatin organization	89	3.54864	4.65536e-08	MORF4L2, HIST1H2BO, TLK1, TLK2, H1F0, SATB1, ARID1A, HUWE1, SMARCE1, KDM2A, SMARCA5, SMARCA1, SUPT6H, SUV420H1, HMGB2, SETD1B, SOX2, H2AFB2, H2AFB1, NPM2, CDY1B, PBRM1, BCOR, HIST1H4I, SETDB1, HIST2H3A, DNMT3A, NFE2, SUV39H1, WHSC1, EHMT2, KAT5, FOXP3, UIMC1, HIST2H3C, MSL3, HDAC4, HDAC1, CDY2B, H3F3A, CDY2A, HDAC9, VCX, NCOR1, HDAC8, HDAC7, RERE, HIST1H3H, HDAC6, BMI1, KDM6A, ARID4A, UTY, HP1BP3…	1.78019
GO:0051276~chromosome organization	99	3.94737	8.31757e-06	MORF4L2, HIST1H2BO, TLK1, TLK2, CDCA5, H1F0, SATB1, ARID1A, SMARCE1, HUWE1, KDM2A, SMARCA5, AKAP8, SMARCA1, SUV420H1, SUPT6H, HMGB2, SETD1B, SOX2, H2AFB2, H2AFB1, NPM2, CDY1B, PBRM1, BCOR, HIST1H4I, HIST2H3A, SETDB1, DNMT3A, NFE2, SUV39H1, WHSC1, FOXP3, KAT5, EHMT2, HIST2H3C, UIMC1, MSL3, HDAC4, HDAC1, CDY2B, H3F3A, CDY2A, VCX, SMC1A, HDAC9, HDAC8, NCOR1, HIST1H3H, RERE, HDAC7, HDAC6, BMI1, KDM6A…	1.54334
GO:0010551~regulation of specific transcription from RNA polymerase II promoter	29	1.1563	1.96599e-05	MEF2C, PPARA, HMGB2, THRA, PPARG, TAF9B, TFE3, TFEB, SRF, TCF7L2, CTNNB1, NR1H2, GFI1, BCOR, TCF3, NR1H3, TBL1XR1, IKZF2, SMAD7, FOXP3, KAT5, HDAC4, DLX1, HNF4A, HDAC1, HDAC9, TBL1X, NCOR1, ENG	2.33258
GO:0045892~negative regulation of transcription, DNA-dependent	76	3.0303	2.18501e-05	MEF2C, PPARA, JDP2, HELT, ARID4A, E2F6, FST, NR6A1, PPARG, CTCF, ZEB1, DAXX, ZNF345, CBFA2T2, CTNNB1, KCNIP3, SIN3A, RARB, ATF7IP, TBL1XR1, SATB1, ZHX1, MECP2, NDUFA13, RBBP7, MBD2, NR0B1, FOXN3, NRIP1, CTNNBIP1, HOXD8, NCOA2, SMARCE1, HIPK2, TGIF1, RIPPLY1, PRDM1, CUX2, MDM4, LCOR, NSD1, KDM6B, SOX2, TAF9B, HAT1, TCF7L1, HIC2, HEXIM2, ATN1, GATAD2A, GFI1, BCOR, TCF4, DNMT3A, ZBTB7A, TNFSF4, RFX5…	1.6141
GO:0016568~chromatin modification	62	2.47209	2.29735e-05	BMI1, KDM6A, UTY, MORF4L2, CTCF, TLK1, TLK2, KDM5C, KDM5D, TBL1XR1, BRCC3, ARID1A, RBBP7, EYA3, TAF12, KDM2A, HUWE1, SMARCE1, SMARCA5, RUVBL1, USP22, SMARCA1, NSD1, KDM6B, MAP3K12, SUV420H1, SUPT6H, SETD1B, HAT1, TSPYL2, NPM2, PBRM1, ACTL6A, KDM3B, BCOR, CHD6, TERF2, SETDB1, DNMT3A, L3MBTL2, NASP, SUV39H1, WHSC1, KAT5, FOXP3, EHMT2, UIMC1, ATXN7L3, MSL3, HDAC4, HDAC1, BCORL1, WHSC1L1, BRE, PHF21A…	1.71084
GO:0051253~negative regulation of RNA metabolic process	76	3.0303	3.95084e-05	MEF2C, PPARA, JDP2, HELT, ARID4A, E2F6, FST, NR6A1, PPARG, CTCF, ZEB1, DAXX, ZNF345, CBFA2T2, CTNNB1, KCNIP3, SIN3A, RARB, ATF7IP, TBL1XR1, SATB1, ZHX1, MECP2, NDUFA13, RBBP7, MBD2, NR0B1, FOXN3, NRIP1, CTNNBIP1, HOXD8, NCOA2, SMARCE1, HIPK2, TGIF1, RIPPLY1, PRDM1, CUX2, MDM4, LCOR, NSD1, KDM6B, SOX2, TAF9B, HAT1, TCF7L1, HIC2, HEXIM2, ATN1, GATAD2A, GFI1, BCOR, TCF4, DNMT3A, ZBTB7A, TNFSF4, RFX5…	1.58735
GO:0000122~negative regulation of transcription from RNA polymerase II promoter	57	2.27273	0.000235482	MEF2C, PPARA, JDP2, HELT, E2F6, FST, PPARG, NR6A1, ZEB1, ZNF345, CTNNB1, KCNIP3, SIN3A, RARB, ATF7IP, SATB1, TBL1XR1, MECP2, NR0B1, MBD2, RBBP7, NRIP1, CTNNBIP1, HOXD8, NCOA2, HIPK2, TGIF1, MDM4, PRDM1, LCOR, NSD1, KDM6B, SOX2, TAF9B, ATN1, HEXIM2, GFI1, TCF4, BCOR, DNMT3A, ZBTB7A, RFX5, SMAD7, KAT5, FOXP2, CDKN1C, HDAC4, DLX1, HDAC1, PHF21A, ID3, HDAC9, TBL1X, ENG, NCOR1, HDAC8, CRYM	1.62017
GO:0032583~regulation of gene-specific transcription	34	1.35566	0.000244001	MEF2C, PPARA, HMGB2, THRA, TFE3, PPARG, TAF9B, TFEB, SRF, TCF7L2, CTNNB1, NR1H2, GFI1, BCOR, TCF3, NR1H3, TBL1XR1, TNFSF4, IKZF2, SMAD7, SMAD2, KAT5, FOXP3, CDKN1C, HDAC4, DLX1, HNF4A, HDAC1, HDAC9, NR5A2, SMARCA1, TBL1X, NCOR1, ENG	1.91841
GO:0032582~negative regulation of gene-specific transcription	17	0.677831	0.000282809	MEF2C, PPARA, TBL1XR1, TNFSF4, SMAD7, TAF9B, PPARG, KAT5, CDKN1C, HDAC4, HDAC1, GFI1, BCOR, TBL1X, HDAC9, ENG, NCOR1	2.67778
GO:0010553~negative regulation of specific transcription from RNA polymerase II promoter	15	0.598086	0.000508038	MEF2C, TBL1XR1, PPARA, SMAD7, TAF9B, PPARG, KAT5, HDAC4, HDAC1, GFI1, BCOR, TBL1X, HDAC9, ENG, NCOR1	2.76614
GO:0006333~chromatin assembly or disassembly	31	1.23604	0.000956198	TSPY2, TSPY3, HMGB2, TSPY1, ARID4A, HP1BP3, TSPY4, NAP1L3, CTCF, HIST2H4A, H2AFB2, H2AFB1, TSPY10, HIST2H4B, NAP1L6, HIST1H2BO, HIST2H2AB, TSPYL2, CDYL, CDY1B, CHD6, HIST1H4I, HIST2H3A, H1F0, HIST1H1E, NFE2, SUV39H1, KAT5, H2AFB3, HIST2H3C, MSL3, CDY2B, SMARCE1, SMARCA5, H3F3A, CDY2A, HIST1H2AM, CDY1, HDAC8, HIST1H3H	1.84555
SNP-depleted within [-700/+100]
Term	Count	%	PValue	Genes	Fold Enrichment
GO:0006325~chromatin organization	75	3.72393	6.67539e-08	BMI1, KDM6A, HP1BP3, UTY, MORF4L2, NAP1L3, CTCF, HIST2H4A, NAP1L6, HIST2H4B, TLK1, TLK2, KDM5C, KDM5D, H1F0, TBL1XR1, SATB1, HIST1H1E, BRCC3, ARID1A, RBBP7, H2AFB3, TAF12, KDM2A, SMARCE1, HUWE1, SMARCA5, USP22, RUVBL1, SMARCA1, NSD1, MAP3K12, KDM6B, SUV420H1, SUPT6H, TSPY2, TSPY3, H1FNT, HMGB2, TSPY1, SETD1B, TSPY4, SOX2, HAT1, TCF7L1, H2AFB2, TSPY10, H2AFB1, CDYL, TSPYL2, CDY1B, HIST1H4I, BCOR, …	1.89499
GO:0051276~chromosome organization	83	4.12115	7.18998e-06	BMI1, KDM6A, HP1BP3, UTY, MORF4L2, NAP1L3, CTCF, HIST2H4A, NAP1L6, HIST2H4B, STRA8, TLK1, TLK2, CDCA5, KDM5C, KDM5D, H1F0, TBL1XR1, SATB1, HIST1H1E, BRCC3, AIFM1, ARID1A, RBBP7, H2AFB3, TAF12, KDM2A, SMARCE1, HUWE1, SMARCA5, AKAP8, USP22, RUVBL1, SMARCA1, NSD1, MAP3K12, KDM6B, SUV420H1, SUPT6H, TSPY2, TSPY3, H1FNT, HMGB2, TSPY1, SETD1B, TSPY4, SOX2, HAT1, TCF7L1, H2AFB2, TSPY10, H2AFB1, CDYL, TSP…	1.63446
GO:0016568~chromatin modification	51	2.53227	6.19195e-05	BMI1, KDM6A, UTY, MORF4L2, CTCF, TLK1, TLK2, KDM5C, KDM5D, TBL1XR1, BRCC3, ARID1A, RBBP7, TAF12, HUWE1, SMARCE1, KDM2A, SMARCA5, RUVBL1, USP22, SMARCA1, NSD1, KDM6B, MAP3K12, SUPT6H, SUV420H1, SETD1B, HAT1, TSPYL2, BCOR, TERF2, SETDB1, DNMT3A, L3MBTL2, NASP, SUV39H1, WHSC1, EHMT2, FOXP3, ATXN7L3, MSL3, BCORL1, WHSC1L1, BRE, PHF21A, KDM4A, HDAC9, NCOR1, HDAC8, RERE, HDAC6	1.77769
GO:0007283~spermatogenesis	53	2.63158	0.000338806	CADM1, DEDD, NR6A1, TAF7L, SPEM1, STRA8, HSF1, KDM5D, LIMK2, PMCH, ZNF541, HERC2, BCAP31, BPY2B, VCX3A, VCX3B, CATSPER2, BPY2C, BPY2, SIAH1, RUVBL1, TSPY2, TSNAXIP1, TSPY3, H1FNT, HMGB2, TSPY1, USP9Y, CREM, SOX3, ADAD1, GPR64, BCL2L1, NR2C2, C17ORF75, TSPY10, SPANXA2, CDYL, DUSP13, SPAG11B, CYP26B1, CDY1B, SPAG11A, DEFB118, ODF2, PAFAH1B1, PCYT1B, FAM50A, DAZ3, DNMT3A, DAZ4, DAZ1, DAZ2, TMBIM6, R…	1.64347
GO:0048232~male gamete generation	53	2.63158	0.000338806	CADM1, DEDD, NR6A1, TAF7L, SPEM1, STRA8, HSF1, KDM5D, LIMK2, PMCH, ZNF541, HERC2, BCAP31, BPY2B, VCX3A, VCX3B, CATSPER2, BPY2C, BPY2, SIAH1, RUVBL1, TSPY2, TSNAXIP1, TSPY3, H1FNT, HMGB2, TSPY1, USP9Y, CREM, SOX3, ADAD1, GPR64, BCL2L1, NR2C2, C17ORF75, TSPY10, SPANXA2, CDYL, DUSP13, SPAG11B, CYP26B1, CDY1B, SPAG11A, DEFB118, ODF2, PAFAH1B1, PCYT1B, FAM50A, DAZ3, DNMT3A, DAZ4, DAZ1, DAZ2, TMBIM6, R…	1.64347
GO:0034728~nucleosome organization	22	1.09235	0.000507987	TSPY2, TSPY3, HMGB2, TSPY1, HP1BP3, TSPY4, NAP1L3, CTCF, HIST2H4A, H2AFB2, TSPY10, NAP1L6, HIST2H4B, H2AFB1, TSPYL2, HIST1H4I, H1F0, HIST2H3A, HIST1H1E, NFE2, NASP, ARID1A, H2AFB3, HIST2H3C, SMARCE1, SMARCA5, H3F3A, HIST1H2AM, HIST1H3H	2.25932
GO:0007276~gamete generation	63	3.1281	0.000724708	CADM1, DEDD, NR6A1, RPS6KB1, TAF7L, SPEM1, STRA8, HSF1, SPIN3, SPIN4, KDM5D, LIMK2, PMCH, ZNF541, HERC2, NRIP1, BCAP31, BPY2B, VCX3A, VCX3B, CATSPER2, BPY2C, CELF1, BPY2, SIAH1, RUVBL1, TSPY2, TSNAXIP1, TSPY3, H1FNT, HMGB2, TSPY1, TDRD6, USP9Y, CREM, USP9X, SOX3, ADAD1, GPR64, BCL2L1, NR2C2, TSPY10, C17ORF75, SPANXA2, CDYL, DUSP13, SPAG11B, BCL2, SPAG11A, CDY1B, CYP26B1, DEFB118, ODF2, PAFAH1B1, …	1.52328
GO:0006323~DNA packaging	25	1.24131	0.000923952	TSPY2, TSPY3, HMGB2, H1FNT, TSPY1, HP1BP3, TSPY4, HAT1, CTCF, NAP1L3, HIST2H4A, H2AFB2, H2AFB1, HIST2H4B, TSPY10, NAP1L6, TSPYL2, STRA8, HIST1H4I, CDCA5, H1F0, HIST2H3A, HIST1H1E, AIFM1, H2AFB3, HIST2H3C, SMC4, SMARCA5, H3F3A, AKAP8, HIST1H2AM, HIST1H3H	2.04076
SNP-depleted within [-800/+100]
Term	Count	%	PValue	Genes	Fold Enrichment
GO:0006325~chromatin organization	66	4.02439	1.38076e-08	BMI1, KDM6A, HP1BP3, UTY, MORF4L2, NAP1L3, CTCF, HIST2H4A, HIST2H4B, TLK2, KDM5C, KDM5D, H1F0, TBL1XR1, SATB1, HIST1H1E, BRCC3, ARID1A, RBBP7, H2AFB3, TAF12, KDM2A, HUWE1, SMARCE1, USP22, SMARCA1, NSD1, MAP3K12, SUV420H1, SUPT6H, TSPY2, TSPY3, H1FNT, HMGB2, TSPY1, TSPY4, SETD1B, SOX2, HAT1, TCF7L1, H2AFB2, TSPY10, H2AFB1, CDYL, TSPYL2, CDY1B, HIST1H4I, BCOR, TERF2, HIST2H3A, SETDB1, DNMT3A, NFE2,…	2.0905
GO:0051276~chromosome organization	72	4.39024	1.94827e-06	BMI1, KDM6A, HP1BP3, UTY, MORF4L2, NAP1L3, CTCF, HIST2H4A, HIST2H4B, STRA8, TLK2, KDM5C, KDM5D, H1F0, TBL1XR1, SATB1, HIST1H1E, BRCC3, AIFM1, ARID1A, RBBP7, H2AFB3, TAF12, KDM2A, SMARCE1, HUWE1, USP22, AKAP8, SMARCA1, NSD1, MAP3K12, SUV420H1, SUPT6H, TSPY2, TSPY3, H1FNT, HMGB2, TSPY1, TSPY4, SETD1B, SOX2, HAT1, TCF7L1, H2AFB2, TSPY10, H2AFB1, CDYL, TSPYL2, CDY1B, HIST1H4I, BCOR, TERF2, APC, HIST2…	1.77741
GO:0016568~chromatin modification	44	2.68293	3.98863e-05	BMI1, KDM6A, UTY, SETD1B, MORF4L2, HAT1, CTCF, TSPYL2, TLK2, BCOR, TERF2, KDM5C, KDM5D, SETDB1, DNMT3A, TBL1XR1, BRCC3, L3MBTL2, NASP, SUV39H1, WHSC1, ARID1A, EHMT2, RBBP7, FOXP3, ATXN7L3, MSL3, TAF12, HUWE1, SMARCE1, KDM2A, BCORL1, WHSC1L1, PHF21A, USP22, HDAC9, SMARCA1, NSD1, HDAC8, MAP3K12, RERE, SUV420H1, HDAC6, SUPT6H	1.92265
GO:0007283~spermatogenesis	47	2.86585	7.58327e-05	CADM1, DEDD, NR6A1, TAF7L, SPEM1, HSF1, STRA8, KDM5D, LIMK2, PMCH, ZNF541, HERC2, BCAP31, VCX3A, BPY2B, CATSPER2, BPY2C, BPY2, TSNAXIP1, TSPY2, TSPY3, HMGB2, H1FNT, TSPY1, USP9Y, SOX3, CREM, GPR64, BCL2L1, NR2C2, TSPY10, C17ORF75, SPANXA2, CDYL, DUSP13, SPAG11B, SPAG11A, CDY1B, CYP26B1, ODF2, PCYT1B, DAZ3, FAM50A, DNMT3A, DAZ4, DAZ1, DAZ2, TMBIM6, RBMY1B, RBMY1A1, SPANXB2, SPANXB1, RBMY1F, CDY2B,…	1.82703
GO:0048232~male gamete generation	47	2.86585	7.58327e-05	CADM1, DEDD, NR6A1, TAF7L, SPEM1, HSF1, STRA8, KDM5D, LIMK2, PMCH, ZNF541, HERC2, BCAP31, VCX3A, BPY2B, CATSPER2, BPY2C, BPY2, TSNAXIP1, TSPY2, TSPY3, HMGB2, H1FNT, TSPY1, USP9Y, SOX3, CREM, GPR64, BCL2L1, NR2C2, TSPY10, C17ORF75, SPANXA2, CDYL, DUSP13, SPAG11B, SPAG11A, CDY1B, CYP26B1, ODF2, PCYT1B, DAZ3, FAM50A, DNMT3A, DAZ4, DAZ1, DAZ2, TMBIM6, RBMY1B, RBMY1A1, SPANXB2, SPANXB1, RBMY1F, CDY2B,…	1.82703
GO:0051494~negative regulation of cytoskeleton organization	14	0.853659	0.000469182	SHROOM2, MAP1A, MID1IP1, MID1, ARHGAP6, TMSB15A, MAP2, CAPG, TMSB15B, SPTBN2, TMSB4X, TMSB4Y, ARAP1, APC, HDAC6	3.04764
GO:0048609~reproductive process in a multicellular organism	63	3.84146	0.000516524	CADM1, DEDD, STAT5A, NR6A1, TAF7L, SPEM1, ATP2B2, STRA8, HSF1, SPIN3, APLN, SPIN4, KDM5D, LIMK2, PMCH, ZNF541, HERC2, MBD2, BCAP31, BPY2B, VCX3A, CATSPER2, BPY2C, CELF1, BPY2, TSPY2, TSNAXIP1, TSPY3, H1FNT, HMGB2, TSPY1, TDRD6, USP9Y, CREM, USP9X, SOX3, DRD5, GPR64, TAC1, BCL2L1, NR2C2, TSPY10, C17ORF75, SPANXA2, CDYL, DUSP13, SPAG11B, BCL2, SPAG11A, CDY1B, CYP26B1, ODF2, PCYT1B, FAM50A, DAZ3, DN…	1.54885
GO:0032504~multicellular organism reproduction	63	3.84146	0.000516524	CADM1, DEDD, STAT5A, NR6A1, TAF7L, SPEM1, ATP2B2, STRA8, HSF1, SPIN3, APLN, SPIN4, KDM5D, LIMK2, PMCH, ZNF541, HERC2, MBD2, BCAP31, BPY2B, VCX3A, CATSPER2, BPY2C, CELF1, BPY2, TSPY2, TSNAXIP1, TSPY3, H1FNT, HMGB2, TSPY1, TDRD6, USP9Y, CREM, USP9X, SOX3, DRD5, GPR64, TAC1, BCL2L1, NR2C2, TSPY10, C17ORF75, SPANXA2, CDYL, DUSP13, SPAG11B, BCL2, SPAG11A, CDY1B, CYP26B1, ODF2, PCYT1B, FAM50A, DAZ3, DN…	1.54885
GO:0034728~nucleosome organization	19	1.15854	0.000596228	TSPY2, TSPY3, HMGB2, TSPY1, HP1BP3, TSPY4, NAP1L3, CTCF, HIST2H4A, H2AFB2, TSPY10, HIST2H4B, H2AFB1, TSPYL2, HIST1H4I, H1F0, HIST2H3A, HIST1H1E, NFE2, NASP, ARID1A, H2AFB3, HIST2H3C, SMARCE1, H3F3A, HIST1H3H	2.44607
GO:0007276~gamete generation	53	3.23171	0.000659059	CADM1, DEDD, NR6A1, TAF7L, SPEM1, STRA8, HSF1, SPIN3, SPIN4, KDM5D, LIMK2, PMCH, ZNF541, HERC2, BCAP31, BPY2B, VCX3A, CATSPER2, BPY2C, CELF1, BPY2, TSPY2, TSNAXIP1, TSPY3, H1FNT, HMGB2, TSPY1, TDRD6, USP9Y, CREM, USP9X, SOX3, GPR64, BCL2L1, NR2C2, TSPY10, C17ORF75, SPANXA2, CDYL, DUSP13, BCL2, SPAG11B, CDY1B, CYP26B1, SPAG11A, ODF2, PCYT1B, FAM50A, DAZ3, DNMT3A, DAZ4, DAZ1, DAZ2, TMBIM6, RBMY1B, …	1.60648
GO:0051129~negative regulation of cellular component organization	25	1.52439	0.000661827	RTN4, PLXNA3, SHROOM2, MBP, IRAK3, PTK2, ARHGAP6, PACSIN3, TMSB15A, SEMA3F, TMSB15B, TERF2, APC, SMAD7, MAP1A, MID1IP1, FOXP3, MID1, CAPG, MAP2, SPTBN2, TGFBR3, TMSB4X, TMSB4Y, ARAP1, HDAC6	2.1079
GO:0006333~chromatin assembly or disassembly	23	1.40244	0.000776543	TSPY2, TSPY3, HMGB2, TSPY1, HP1BP3, TSPY4, CTCF, NAP1L3, HIST2H4A, H2AFB2, H2AFB1, TSPY10, HIST2H4B, TSPYL2, CDYL, CDY1B, HIST1H4I, H1F0, HIST2H3A, HIST1H1E, NFE2, SUV39H1, H2AFB3, HIST2H3C, MSL3, CDY2B, SMARCE1, H3F3A, CDY2A, CDY1, HDAC8, HIST1H3H	2.16831
SNP-depleted within [-900/+100]
Term	Count	%	PValue	Genes	Fold Enrichment
GO:0006325~chromatin organization	62	4.47653	7.22653e-10	BMI1, KDM6A, HP1BP3, UTY, MORF4L2, NAP1L3, CTCF, HIST2H4A, HIST2H4B, TLK2, KDM5C, KDM5D, H1F0, TBL1XR1, SATB1, HIST1H1E, BRCC3, ARID1A, RBBP7, H2AFB3, TAF12, KDM2A, HUWE1, SMARCE1, NSD1, MAP3K12, SUV420H1, SUPT6H, TSPY2, TSPY3, H1FNT, HMGB2, TSPY1, TSPY4, SETD1B, SOX2, HAT1, TCF7L1, H2AFB2, TSPY10, H2AFB1, TSPYL2, CDY1B, BCOR, HIST1H4I, TERF2, HIST2H3A, DNMT3A, NFE2, L3MBTL2, NASP, SUV39H1, WHSC1…	2.3293
GO:0051276~chromosome organization	68	4.90975	6.83074e-08	BMI1, KDM6A, HP1BP3, UTY, MORF4L2, NAP1L3, CTCF, HIST2H4A, HIST2H4B, STRA8, TLK2, KDM5C, KDM5D, H1F0, TBL1XR1, SATB1, HIST1H1E, BRCC3, AIFM1, ARID1A, RBBP7, H2AFB3, TAF12, KDM2A, HUWE1, SMARCE1, AKAP8, NSD1, MAP3K12, SUV420H1, SUPT6H, TSPY2, TSPY3, H1FNT, HMGB2, TSPY1, TSPY4, SETD1B, SOX2, HAT1, TCF7L1, H2AFB2, TSPY10, H2AFB1, TSPYL2, CDY1B, HIST1H4I, BCOR, TERF2, APC, HIST2H3A, DNMT3A, PDS5B, NF…	1.9911
GO:0016568~chromatin modification	41	2.96029	8.15247e-06	BMI1, KDM6A, UTY, SETD1B, MORF4L2, HAT1, CTCF, TSPYL2, TLK2, BCOR, TERF2, KDM5C, KDM5D, DNMT3A, TBL1XR1, BRCC3, L3MBTL2, NASP, SUV39H1, WHSC1, ARID1A, EHMT2, RBBP7, FOXP3, ATXN7L3, MSL3, TAF12, HUWE1, SMARCE1, KDM2A, BCORL1, WHSC1L1, PHF21A, HDAC9, NSD1, HDAC8, MAP3K12, RERE, SUV420H1, HDAC6, SUPT6H	2.125
GO:0048232~male gamete generation	42	3.03249	5.75727e-05	CADM1, DEDD, NR6A1, TAF7L, STRA8, KDM5D, LIMK2, PMCH, ZNF541, HERC2, BCAP31, BPY2B, VCX3A, CATSPER2, BPY2C, BPY2, TSNAXIP1, TSPY2, TSPY3, H1FNT, HMGB2, TSPY1, USP9Y, SOX3, CREM, GPR64, BCL2L1, NR2C2, TSPY10, C17ORF75, SPANXA2, DUSP13, SPAG11B, SPAG11A, CDY1B, CYP26B1, DAZ3, FAM50A, DNMT3A, DAZ4, DAZ1, DAZ2, TMBIM6, RBMY1B, RBMY1A1, SPANXB2, SPANXB1, RBMY1F, CDY2B, RBMY1J, TUBD1, CDY2A, CDY1, VCX	1.93653
GO:0007283~spermatogenesis	42	3.03249	5.75727e-05	CADM1, DEDD, NR6A1, TAF7L, STRA8, KDM5D, LIMK2, PMCH, ZNF541, HERC2, BCAP31, BPY2B, VCX3A, CATSPER2, BPY2C, BPY2, TSNAXIP1, TSPY2, TSPY3, H1FNT, HMGB2, TSPY1, USP9Y, SOX3, CREM, GPR64, BCL2L1, NR2C2, TSPY10, C17ORF75, SPANXA2, DUSP13, SPAG11B, SPAG11A, CDY1B, CYP26B1, DAZ3, FAM50A, DNMT3A, DAZ4, DAZ1, DAZ2, TMBIM6, RBMY1B, RBMY1A1, SPANXB2, SPANXB1, RBMY1F, CDY2B, RBMY1J, TUBD1, CDY2A, CDY1, VCX	1.93653
GO:0034728~nucleosome organization	19	1.37184	7.18916e-05	TSPY2, TSPY3, HMGB2, TSPY1, HP1BP3, TSPY4, NAP1L3, CTCF, HIST2H4A, H2AFB2, TSPY10, HIST2H4B, H2AFB1, TSPYL2, HIST1H4I, H1F0, HIST2H3A, HIST1H1E, NFE2, NASP, ARID1A, H2AFB3, HIST2H3C, SMARCE1, H3F3A, HIST1H3H	2.90132
GO:0006333~chromatin assembly or disassembly	22	1.58845	0.00020059	TSPY2, TSPY3, HMGB2, TSPY1, HP1BP3, TSPY4, CTCF, NAP1L3, HIST2H4A, H2AFB2, H2AFB1, TSPY10, HIST2H4B, TSPYL2, CDY1B, HIST1H4I, H1F0, HIST2H3A, HIST1H1E, NFE2, SUV39H1, H2AFB3, HIST2H3C, MSL3, CDY2B, SMARCE1, H3F3A, CDY2A, CDY1, HDAC8, HIST1H3H	2.46005
GO:0006323~DNA packaging	20	1.44404	0.000500675	TSPY2, TSPY3, H1FNT, HMGB2, TSPY1, HP1BP3, TSPY4, HAT1, CTCF, NAP1L3, HIST2H4A, H2AFB2, TSPY10, HIST2H4B, H2AFB1, TSPYL2, STRA8, HIST1H4I, H1F0, HIST2H3A, HIST1H1E, AIFM1, H2AFB3, HIST2H3C, H3F3A, AKAP8, HIST1H3H	2.42756
GO:0007276~gamete generation	47	3.3935	0.000502269	CADM1, DEDD, NR6A1, TAF7L, STRA8, SPIN3, SPIN4, KDM5D, LIMK2, PMCH, ZNF541, HERC2, BCAP31, BPY2B, VCX3A, CATSPER2, BPY2C, BPY2, CELF1, TSNAXIP1, TSPY2, TSPY3, HMGB2, H1FNT, TSPY1, TDRD6, USP9Y, SOX3, USP9X, CREM, GPR64, BCL2L1, NR2C2, TSPY10, C17ORF75, SPANXA2, DUSP13, SPAG11B, SPAG11A, CDY1B, CYP26B1, DAZ3, FAM50A, DNMT3A, DAZ4, DAZ1, DAZ2, TMBIM6, RBMY1B, RBMY1A1, SPANXB2, SPANXB1, RBMY1F, CDY2…	1.68976
GO:0034621~cellular macromolecular complex subunit organization	43	3.10469	0.000702145	TUBB2B, HP1BP3, AP2S1, CTCF, NAP1L3, HIST2H4A, NDUFAF3, HIST2H4B, TTLL3, ARHGAP6, MAZ, CLP1, VMA21, KPNB1, H1F0, HIST1H1E, TAZ, ARID1A, MBNL1, SMN2, H2AFB3, SMN1, FLNA, SMARCE1, CELF1, STMN1, TSPY2, TSPY3, HMGB2, TSPY1, TSPY4, NUFIP1, H2AFB2, TSPY10, H2AFB1, PTK2, TSPYL2, USP39, GEMIN8, HIST1H4I, HIST2H3A, NFE2, IPO13, NASP, SMAD4, MRRF, HIST2H3C, TUBD1, H3F3A, VCX, HIST1H3H	1.71051

## Sheet: Tables_S3
Table S3
The joint list of overrepresented (fold enrichment > 1.5 and significance P<10-3)			Color legend
GO terms revealed from analysis of all SNP-depleted datasets				The GO term was overrepresented for this dataset
				The GO term was not found among overrepresented terms for this dataset
				Chromatin organization
				Transcription					Bonferroni	Benjamini	FDR
				Multicellular organism reproduction / gamete generation					0.00170134	0.000154787	0.000699221											Bonferroni	Benjamini	FDR																								Bonferroni	Benjamini
				Regulation of organelle organization					0.00357614	0.000255864	0.00147111											0.000198112	4.95318e-05	8.70913e-05																								4.87396e-05	4.87396e-05
				Signal transduction					0.00805804	0.000449381	0.00332226											0.0347805	0.00186141	0.0155592																								0.00685379	0.00228984
									0.0440538	0.00180052	0.0184989											0.0802682	0.0037961	0.0367728																								0.131338	0.0155229
			SNP-depleted dataset within						0.0845411	0.00294	0.0362648											0.0888019	0.00403509	0.0408687																								0.234862	0.0156237
	GO Term Name	[-300/+100]	[-400/+100]	[-500/+100]	[-600/+100]	[-700/+100]	[-800/+100]	[-900/+100]	0.23471	0.00650317	0.109785											0.0931483	0.00390341	0.0429696																								0.234862	0.0156237
	GO:0016568~chromatin modification		[-400/+100]	[-500/+100]	[-600/+100]	[-700/+100]	[-800/+100]	[-900/+100]	0.506225	0.0125223	0.289356											0.154774	0.00644647	0.0738855																								0.809214	0.0595113
Chromatin organization	GO:0006325~chromatin organization			[-500/+100]	[-600/+100]	[-700/+100]	[-800/+100]	[-900/+100]	0.523875	0.0127129	0.304258											0.632977	0.0260323	0.439617																								0.838589	0.0630597
	GO:0051276~chromosome organization				[-600/+100]	[-700/+100]	[-800/+100]	[-900/+100]	0.654683	0.016736	0.435674											0.646048	0.0262791	0.455486																								0.838589	0.0630597
	GO:0006333~chromatin assembly or disassembly				[-600/+100]		[-800/+100]	[-900/+100]	0.655311	0.0165047	0.436418											0.699949	0.0289342	0.527749																								0.878193	0.0677713
	GO:0034728~nucleosome organization					[-700/+100]	[-800/+100]	[-900/+100]	0.860383	0.0277346	0.805219											0.884993	0.0449735	0.946163																								0.902436	0.0701448
	GO:0006323~DNA packaging					[-700/+100]		[-900/+100]	0.90612	0.0314639	0.966753											0.982949	0.0666816	1.77377																								0.903385	0.0683693
									0.975297	0.0457654	1.5082																																					0.935576	0.0774879
	GO:0010551~regulation of specific transcription from RNA polymerase II promoter	[-300/+100]	[-400/+100]	[-500/+100]	[-600/+100]				0.988873	0.0533806	1.83023
Transcription	GO:0000122~negative regulation of transcription from RNA polymerase II promoter			[-500/+100]	[-600/+100]
	GO:0032583~regulation of gene-specific transcription			[-500/+100]	[-600/+100]
	GO:0045892~negative regulation of transcription, DNA-dependent			[-500/+100]	[-600/+100]
	GO:0010553~negative regulation of specific transcription from RNA polymerase II promoter				[-600/+100]
	GO:0032582~negative regulation of gene-specific transcription				[-600/+100]
	GO:0010552~positive regulation of specific transcription from RNA polymerase II promoter	[-300/+100]	[-400/+100]
Multicellular organism	GO:0007276~gamete generation					[-700/+100]	[-800/+100]	[-900/+100]
reproduction / gamete generation	GO:0048232~male gamete generation					[-700/+100]	[-800/+100]	[-900/+100]
	GO:0007283~spermatogenesis					[-700/+100]	[-800/+100]	[-900/+100]
	GO:0048609~reproductive process in a multicellular organism						[-800/+100]
	GO:0032504~multicellular organism reproduction						[-800/+100]
Regulation of organelle	GO:0051494~negative regulation of cytoskeleton organization	[-300/+100]	[-400/+100]	[-500/+100]			[-800/+100]
organization	GO:0051493~regulation of cytoskeleton organization		[-400/+100]	[-500/+100]
	GO:0010639~negative regulation of organelle organization	[-300/+100]	[-400/+100]	[-500/+100]
	GO:0033043~regulation of organelle organization			[-500/+100]
	GO:0051129~negative regulation of cellular component organization	[-300/+100]	[-400/+100]	[-500/+100]			[-800/+100]
Signal transduction	GO:0030521~androgen receptor signaling pathway			[-500/+100]
	GO:0035023~regulation of Rho protein signal transduction	[-300/+100]	[-400/+100]
	GO:0008624~induction of apoptosis by extracellular signals	[-300/+100]	[-400/+100]
	GO:0043407~negative regulation of MAP kinase activity	[-300/+100]	[-400/+100]
	GO:0030509~BMP signaling pathway	[-300/+100]
	GO:0007265~Ras protein signal transduction	[-300/+100]
Miscellaneous	GO:0051253~negative regulation of RNA metabolic process			[-500/+100]	[-600/+100]
	GO:0051318~G1 phase	[-300/+100]
	GO:0034621~cellular macromolecular complex subunit organization							[-900/+100]
	GO:0043242~negative regulation of protein complex disassembly		[-400/+100]	[-500/+100]
	GO:0043244~regulation of protein complex disassembly		[-400/+100]
[truncated: 1 more columns]
